# Supplementary material for: Dual role of nitroarenes as electrophiles and arylamine surrogates in Buchwald–Hartwig-type coupling for C–N bond construction
Source: Royal Society of Chemistry journal article supplement (doi:10.1039/d3sc06618e), 2024-01-01

# Supporting Information

## Dual role of nitroarenes as electrophiles and arylamine surrogates in Buchwald-Hartwig-type coupling for C–N bond construction

Zhiguo Lei,<sup>[a]</sup> Jiaxin Yao,<sup>[a]</sup> Yuxuan Xiao,<sup>[a]</sup> Wenbo H. Liu,<sup>[c]</sup> Lin Yu,<sup>\*[a]</sup> Wengui Duan,<sup>\*[a]</sup> and Chao-Jun Li <sup>\*[b]</sup>

<sup>[a]</sup> *School of Chemistry and Chemical Engineering, Guangxi Key Laboratory of Electrochemical Energy Materials, Guangxi Colleges and Universities Key Laboratory of Applied Chemistry Technology and Resource Development, Guangxi University, No. 100, East Daxue Road, Nanning, Guangxi 530004, P. R. China.*

<sup>[b]</sup> *Department of Chemistry and FRQNT Center for Green Chemistry and Catalysis, McGill University, 801 Sherbrooke Street West, Montreal, Quebec H3A 0B8, Canada.*

<sup>[c]</sup> *School of Chemistry, Sun Yat-sen University, Guangzhou 510006, China*

\*E-mail: linyu@gxu.edu.cn;

\*E-mail: cj.li@mcgill.ca

## Table of Contents

|                                                                                                   |     |
|---------------------------------------------------------------------------------------------------|-----|
| <b>1. General Information</b> .....                                                               | S2  |
| <b>2. Optimization of Reaction Conditions for the Synthesis of Symmetrical Diarylamines</b> ..... | S2  |
| <b>3. Optimization of Reaction Conditions for the Synthesis of Symmetrical Triarylamine</b> ..... | S6  |
| <b>4. General Procedure for Product 2 or 3</b> .....                                              | S6  |
| <b>5. General Procedure for Product 4 or 5</b> .....                                              | S7  |
| <b>6. Mechanistic Studies</b> .....                                                               | S8  |
| <b>7. General Procedure for Synthesis of Hole-Transporting Material TCTA</b> .....                | S9  |
| <b>8. Scale-Up Experiments</b> .....                                                              | S10 |
| <b>9. Characterization Data of Starting Materials and Products</b> .....                          | S12 |
| <b>10. References</b> .....                                                                       | S40 |
| <b>11. NMR Spectra of Starting Materials and Products</b> .....                                   | S41 |

## 1. General Information

<sup>1</sup>H NMR spectra were recorded on Bruker 500 MHz or 600 MHz spectrometer and the chemical shifts were reported in parts per million ( $\delta$ ) relative to internal solvent signal (7.261 ppm in CDCl<sub>3</sub> or 2.500 ppm in (CD<sub>3</sub>)<sub>2</sub>SO). The peak patterns are indicated as follows: s, singlet; d, doublet; dd, doublet of doublet; t, triplet; q, quartet; m, multiplet. The coupling constants, J, are reported in Hertz (Hz). <sup>13</sup>C NMR spectra were obtained at Bruker 125 MHz and 151 MHz and referenced to the internal solvent signals (central peak is 77.00 ppm in CDCl<sub>3</sub> or 40.000 ppm in (CD<sub>3</sub>)<sub>2</sub>SO). CDCl<sub>3</sub> was used as the NMR solvent. APEX II (Bruker Inc.) was used for HR-MS and APCI-MS.

Unless otherwise noted, all reagents were purchased from commercial suppliers (Energy-Chemical, Bidepharm, Heowns, or TCI) and used without further purification. Flash column chromatography was performed over silica gel 200-300. The reagents were weighed and handled in a glove box. All reactions were heated by metal sand bath (WATTCAS, LAB-500, <https://www.wattcas.com>).

## 2. Optimization of Reaction Conditions for the Synthesis of Symmetrical Diarylamines

Table S1. Screening of reductant <sup>a</sup>

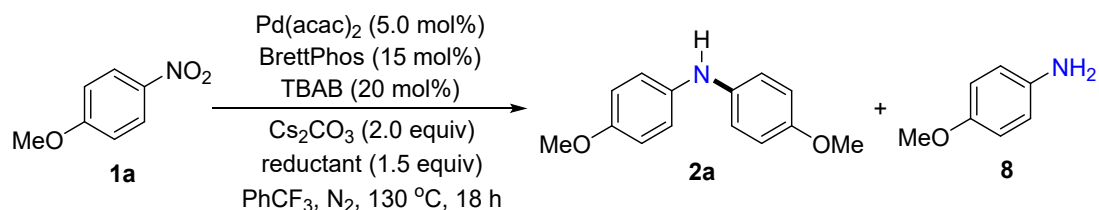

| entry           | reductant                        | <b>2a</b> <sup>b</sup> /yield/% | <b>8</b> <sup>b</sup> /yield/% |
|-----------------|----------------------------------|---------------------------------|--------------------------------|
| 1 <sup>c</sup>  | Fe                               | 0                               | 0                              |
| 2 <sup>c</sup>  | Mn                               | 0                               | 0                              |
| 3 <sup>d</sup>  | Ph <sub>3</sub> P                | 0                               | 0                              |
| 4 <sup>e</sup>  | propan-2-ol                      | trace                           | 0                              |
| 5               | PHMS                             | 0                               | 77                             |
| 6               | HSiEt <sub>3</sub>               | 19                              | 27                             |
| 7               | PHSiH <sub>3</sub>               | 0                               | 81                             |
| 8 <sup>d</sup>  | B <sub>2</sub> cat <sub>2</sub>  | 0                               | 0                              |
| 9               | B <sub>2</sub> (OH) <sub>4</sub> | 0                               | < 20                           |
| 10              | B <sub>2</sub> nep <sub>2</sub>  | 56                              | < 20                           |
| 11 <sup>f</sup> | HBpin                            | 55                              | 0                              |
| 12              | B <sub>2</sub> pin <sub>2</sub>  | 83                              | 0                              |
| 13 <sup>g</sup> | B <sub>2</sub> pin <sub>2</sub>  | 36                              | 0                              |
| 14 <sup>h</sup> | B <sub>2</sub> pin <sub>2</sub>  | 61                              | < 20                           |

<sup>a</sup> Reaction conditions: 4-nitroanisole **1a** (0.30 mmol), Pd(acac)<sub>2</sub> (5.0 mol%), BrettPhos (15 mol%), Cs<sub>2</sub>CO<sub>3</sub> (2.0 equiv), TBAB (20 mol%), and reductant (1.5 equiv) in PhCF<sub>3</sub> (1.5 mL) at 130 °C for 18 hours under N<sub>2</sub>; <sup>b</sup> Isolated yield; <sup>c</sup> Generating a complex mixture containing triarylamines (< 20%); <sup>d</sup> Most all of the starting material remained; <sup>e</sup>

When  $K_3PO_4$  and 1,4-dioxane were used, a denitrative hydrogenation product anisole was formed;<sup>f</sup> A small amount of triarylamine was formed (< 20%);<sup>g</sup> 0.3 mmol  $B_2pin_2$  was used, and a small amount of triarylamine was generated (37%);<sup>h</sup> 0.6 mmol  $B_2pin_2$  were used, and a small amount of *p*-anisidine was formed (< 20%).

**Table S2. Screening of ligand <sup>a</sup>**

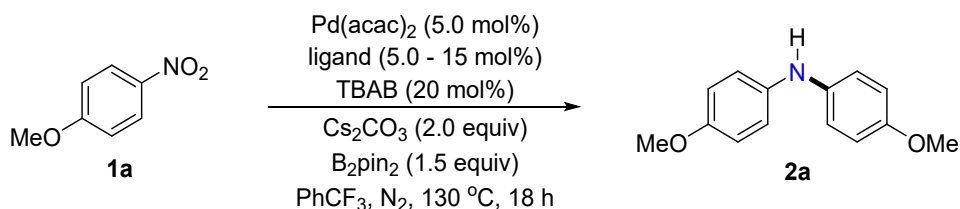

| entry | ligand    | <b>2a</b> <sup>b</sup> /yield/% |
|-------|-----------|---------------------------------|
| 1     | BrettPhos | 83                              |
| 2     | XPhos     | 46                              |
| 3     | SPhos     | 0                               |
| 4     | RuPhos    | 0                               |
| 5     | JohnPhos  | 0                               |
| 6     | XantPhos  | 0                               |
| 7     | DPPF      | 0                               |
| 8     | IPr·HCl   | 0                               |

<sup>a</sup> Reaction conditions: 4-nitroanisole **1a** (0.30 mmol),  $Pd(acac)_2$  (5.0 mol%), ligand (15 mol% for monodentate, 5.0 mol% for bidentate and carbene ligand),  $Cs_2CO_3$  (2.0 equiv), TBAB (20 mol%), and  $B_2pin_2$  (1.5 equiv) in  $PhCF_3$  (1.5 mL) at 130 °C for 18 hours under  $N_2$ ; <sup>b</sup> Isolated yield.

**Table S3. Screening of catalyst <sup>a</sup>**

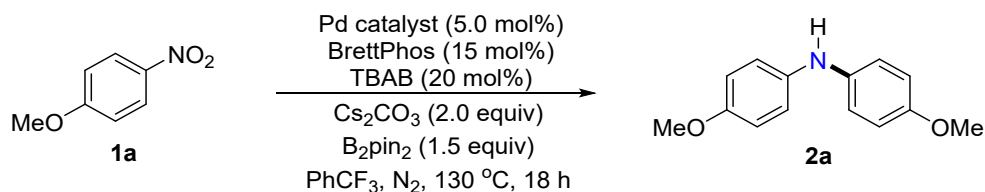

| entry | Pd catalyst       | <b>2a</b> <sup>b</sup> /yield/% |
|-------|-------------------|---------------------------------|
| 1     | $Pd(acac)_2$      | 83                              |
| 2     | $Pd(dba)_2$       | < 20                            |
| 3     | $Pd(OAc)_2$       | 50                              |
| 4     | $[Pd(allyl)Cl]_2$ | 25                              |
| 5     | $PdCl_2(cod)$     | < 20                            |
| 6     | $Pd(TFA)_2$       | 37                              |
| 7     | $Pd(PPh_3)_4$     | 0                               |
| 8     | $Pd(tBu_3P)_2$    | 0                               |

<sup>a</sup> Reaction conditions: 4-nitroanisole **1a** (0.30 mmol), Pd catalyst (5.0 mol%), BrettPhos (15 mol%),  $Cs_2CO_3$  (2.0 equiv), TBAB (20 mol%), and  $B_2pin_2$  (1.5

equiv) in PhCF<sub>3</sub> (1.5 mL) at 130 °C for 18 hours under N<sub>2</sub>; <sup>b</sup> Isolated yield.

**Table S4. Screening of base <sup>a</sup>**

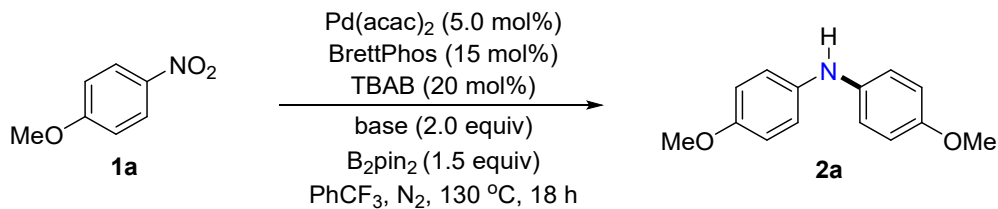

| entry          | base                            | <b>2a</b> <sup>b</sup> /yield/% |
|----------------|---------------------------------|---------------------------------|
| 1 <sup>c</sup> | CsOH·H <sub>2</sub> O           | 41                              |
| 2              | CsF                             | < 20                            |
| 3              | K <sub>3</sub> PO <sub>4</sub>  | 29                              |
| 4              | KO <sup>t</sup> Bu              | 57                              |
| 5              | KF                              | 0                               |
| 6              | K <sub>2</sub> CO <sub>3</sub>  | 48                              |
| 7              | Cs <sub>2</sub> CO <sub>3</sub> | 83                              |
| 8              | DBU                             | 0                               |

<sup>a</sup> Reaction conditions: 4-nitroanisole **1a** (0.30 mmol), Pd(acac)<sub>2</sub> (5.0 mol%), BrettPhos (15 mol%), base (2.0 equiv), TBAB (20 mol%), and B<sub>2</sub>pin<sub>2</sub> (1.5 equiv) in PhCF<sub>3</sub> (1.5 mL) at 130 °C for 18 hours under N<sub>2</sub>; <sup>b</sup> Isolated yield; <sup>c</sup> When PPh<sub>3</sub> (0.2 mmol) in DMF was used instead of B<sub>2</sub>pin<sub>2</sub> in PhCF<sub>3</sub> and no TBAB at 150 °C, the azoarene product was formed.

**Table S5. Screening of solvent <sup>a</sup>**

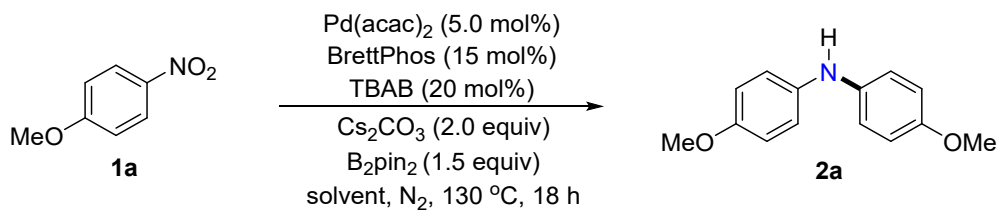

| entry          | solvent           | <b>2a</b> <sup>b</sup> /yield/% |
|----------------|-------------------|---------------------------------|
| 1              | PhCF <sub>3</sub> | 83                              |
| 2 <sup>c</sup> | DMF               | 0                               |
| 3              | DMSO              | 0                               |
| 4              | toluene           | 55                              |
| 5              | <i>o</i> -xylene  | 53                              |
| 6              | PhF               | 58                              |
| 7              | 1,4-dioxane       | 27                              |
| 8              | <i>n</i> -heptane | 41                              |
| 9              | THF               | < 20                            |

<sup>a</sup> Reaction conditions: 4-nitroanisole **1a** (0.30 mmol), Pd(acac)<sub>2</sub> (5.0 mol%), BrettPhos (15 mol%), Cs<sub>2</sub>CO<sub>3</sub> (2.0 equiv), TBAB (20 mol%), and B<sub>2</sub>pin<sub>2</sub> (1.5

equiv) in a solvent (1.5 mL) at 130 °C for 18 hours under N<sub>2</sub>; <sup>b</sup> Isolated yield; <sup>c</sup> When LiO<sup>t</sup>Bu or KOMe were used instead of Cs<sub>2</sub>CO<sub>3</sub>, the azoxyarene product was formed.

**Table S6. Screening of additive and temperature <sup>a</sup>**

| entry | additive | temp (°C) | <b>2a</b> <sup>b</sup> /yield/% |
|-------|----------|-----------|---------------------------------|
| 1     | -        | 130       | 65                              |
| 2     | TBAI     | 130       | 66                              |
| 3     | TBAA     | 130       | 75                              |
| 4     | TBAC     | 130       | 72                              |
| 5     | TBAB     | 130       | 83                              |
| 6     | TBAB     | 110       | 73                              |
| 7     | TBAB     | 150       | 70                              |

<sup>a</sup> Reaction conditions: 4-nitroanisole **1a** (0.30 mmol), Pd(acac)<sub>2</sub> (5.0 mol%), BrettPhos (15 mol%), Cs<sub>2</sub>CO<sub>3</sub> (2.0 equiv), additive (20 mol%), and B<sub>2</sub>pin<sub>2</sub> (1.5 equiv) in PhCF<sub>3</sub> (1.5 mL) at a temperature for 18 hours under N<sub>2</sub>; <sup>b</sup> Isolated yield.

**Table S7. Control experiments <sup>a</sup>**

| entry          | Pd catalyst           | ligand    | base                            | reductant                       | <b>8</b> <sup>b</sup> /yield/% | <b>2a</b> <sup>b</sup> /yield/% |
|----------------|-----------------------|-----------|---------------------------------|---------------------------------|--------------------------------|---------------------------------|
| 1              | Pd(acac) <sub>2</sub> | BrettPhos | Cs <sub>2</sub> CO <sub>3</sub> | B <sub>2</sub> pin <sub>2</sub> | 0                              | 83                              |
| 2              | -                     | BrettPhos | Cs <sub>2</sub> CO <sub>3</sub> | B <sub>2</sub> pin <sub>2</sub> | 40                             | 0                               |
| 3              | Pd(acac) <sub>2</sub> | -         | Cs <sub>2</sub> CO <sub>3</sub> | B <sub>2</sub> pin <sub>2</sub> | 43                             | 0                               |
| 4              | Pd(acac) <sub>2</sub> | BrettPhos | -                               | B <sub>2</sub> pin <sub>2</sub> | 0                              | 0                               |
| 5              | Pd(acac) <sub>2</sub> | BrettPhos | Cs <sub>2</sub> CO <sub>3</sub> | -                               | 0                              | 0                               |
| 6 <sup>c</sup> | -                     | -         | Cs <sub>2</sub> CO <sub>3</sub> | B <sub>2</sub> pin <sub>2</sub> | 84                             | 0                               |

<sup>a</sup> Reaction conditions: 4-nitroanisole **1a** (0.30 mmol), Pd(acac)<sub>2</sub> (5.0 mol%), BrettPhos (15 mol%), Cs<sub>2</sub>CO<sub>3</sub> (2.0 equiv), TBAB (20 mol%), and B<sub>2</sub>pin<sub>2</sub> (1.5 equiv) in PhCF<sub>3</sub> (1.5 mL) at 130 °C for 18 hours under N<sub>2</sub>; <sup>b</sup> Isolated yield; <sup>c</sup> B<sub>2</sub>pin<sub>2</sub> (3.0 equiv) and PhCF<sub>3</sub> (3.0 mL) were used.

### 3. Optimization of Reaction Conditions for the Synthesis of Symmetrical Triarylamine

Table S8. Optimization of conditions for the synthesis of symmetrical triarylamine <sup>a, b</sup>

| entry           | Pd catalyst                 | ligand           | base                                | solvent                 | reductant                           | <b>3a</b> <sup>b</sup><br>/yield/% |
|-----------------|-----------------------------|------------------|-------------------------------------|-------------------------|-------------------------------------|------------------------------------|
| 1 <sup>c</sup>  | Pd(acac) <sub>2</sub>       | BrettPhos        | Cs <sub>2</sub> CO <sub>3</sub>     | PhCF <sub>3</sub>       | B <sub>2</sub> pin <sub>2</sub>     | 45                                 |
| 2 <sup>d</sup>  | Pd(acac) <sub>2</sub>       | BrettPhos        | Cs <sub>2</sub> CO <sub>3</sub>     | PhCF <sub>3</sub>       | B <sub>2</sub> pin <sub>2</sub>     | 55                                 |
| 3               | Pd(acac) <sub>2</sub>       | BrettPhos        | Cs <sub>2</sub> CO <sub>3</sub>     | PhCF <sub>3</sub>       | B <sub>2</sub> pin <sub>2</sub>     | 63                                 |
| 4 <sup>e</sup>  | Pd(acac) <sub>2</sub>       | BrettPhos        | Cs <sub>2</sub> CO <sub>3</sub>     | PhCF <sub>3</sub>       | B <sub>2</sub> pin <sub>2</sub>     | 56                                 |
| 5 <sup>f</sup>  | Pd(acac) <sub>2</sub>       | BrettPhos        | Cs <sub>2</sub> CO <sub>3</sub>     | PhCF <sub>3</sub>       | B <sub>2</sub> pin <sub>2</sub>     | 53                                 |
| 6               | Pd(acac) <sub>2</sub>       | BrettPhos        | CsOH·H <sub>2</sub> O               | PhCF <sub>3</sub>       | B <sub>2</sub> pin <sub>2</sub>     | 0                                  |
| 7               | Pd(acac) <sub>2</sub>       | BrettPhos        | K <sub>3</sub> PO <sub>4</sub>      | PhCF <sub>3</sub>       | B <sub>2</sub> pin <sub>2</sub>     | 30                                 |
| 8               | Pd(acac) <sub>2</sub>       | BrettPhos        | KO <sup>t</sup> Bu                  | PhCF <sub>3</sub>       | B <sub>2</sub> pin <sub>2</sub>     | 0                                  |
| 9               | Pd(acac) <sub>2</sub>       | BrettPhos        | Na <sub>2</sub> CO <sub>3</sub>     | PhCF <sub>3</sub>       | B <sub>2</sub> pin <sub>2</sub>     | 0                                  |
| 10              | Pd(acac) <sub>2</sub>       | BrettPhos        | K <sub>2</sub> CO <sub>3</sub>      | PhCF <sub>3</sub>       | B <sub>2</sub> pin <sub>2</sub>     | 25                                 |
| 11              | Pd(acac) <sub>2</sub>       | BrettPhos        | Cs <sub>2</sub> CO <sub>3</sub>     | DMF                     | B <sub>2</sub> pin <sub>2</sub>     | 0                                  |
| <b>12</b>       | <b>Pd(acac)<sub>2</sub></b> | <b>BrettPhos</b> | <b>Cs<sub>2</sub>CO<sub>3</sub></b> | <b>PhCH<sub>3</sub></b> | <b>B<sub>2</sub>pin<sub>2</sub></b> | <b>70</b>                          |
| 13              | Pd(acac) <sub>2</sub>       | BrettPhos        | Cs <sub>2</sub> CO <sub>3</sub>     | <i>m</i> -xylene        | B <sub>2</sub> pin <sub>2</sub>     | 65                                 |
| 14              | Pd(acac) <sub>2</sub>       | BrettPhos        | Cs <sub>2</sub> CO <sub>3</sub>     | PhF                     | B <sub>2</sub> pin <sub>2</sub>     | 59                                 |
| 15              | Pd(acac) <sub>2</sub>       | BrettPhos        | Cs <sub>2</sub> CO <sub>3</sub>     | 1,4-dioxane             | B <sub>2</sub> pin <sub>2</sub>     | 61                                 |
| 16              | Pd(acac) <sub>2</sub>       | BrettPhos        | Cs <sub>2</sub> CO <sub>3</sub>     | <i>n</i> -heptane       | B <sub>2</sub> pin <sub>2</sub>     | 55                                 |
| 17 <sup>k</sup> | Pd(acac) <sub>2</sub>       | BrettPhos        | Cs <sub>2</sub> CO <sub>3</sub>     | PhCH <sub>3</sub>       | B <sub>2</sub> pin <sub>2</sub>     | 36                                 |
| 18 <sup>l</sup> | Pd(acac) <sub>2</sub>       | BrettPhos        | Cs <sub>2</sub> CO <sub>3</sub>     | PhCH <sub>3</sub>       | B <sub>2</sub> pin <sub>2</sub>     | 25                                 |
| 19 <sup>m</sup> | Pd(acac) <sub>2</sub>       | BrettPhos        | Cs <sub>2</sub> CO <sub>3</sub>     | PhCH <sub>3</sub>       | B <sub>2</sub> pin <sub>2</sub>     | 47                                 |

<sup>a</sup> Reaction conditions: 4-nitroanisole **1a** (0.30 mmol), catalyst (5.0 mol%), ligand (15 mol%), base (2.0 equiv), and reductant (0.22 mmol) in solvent (1.0 mL) at 150 °C for 24 hours under N<sub>2</sub>;

<sup>b</sup> Isolated yield; <sup>c</sup> B<sub>2</sub>pin<sub>2</sub> (0.15 mmol); <sup>d</sup> B<sub>2</sub>pin<sub>2</sub> (0.20 mmol), <sup>e</sup> B<sub>2</sub>pin<sub>2</sub> (0.25 mmol), <sup>f</sup> B<sub>2</sub>pin<sub>2</sub> (0.27 mmol); <sup>k</sup> additive (TBAB, 20 mol%), <sup>l</sup> 110 °C, <sup>m</sup> 130 °C.

### 4. General Procedure for Product 2 or 3

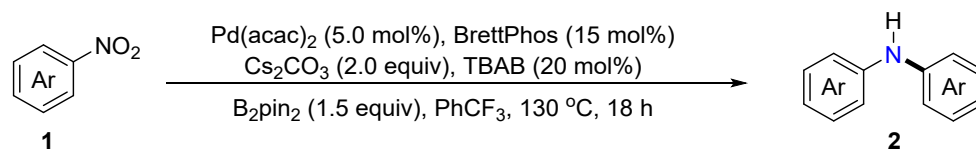

**Procedure A:** In a nitrogen gas filled glovebox, a reaction tube (35 mL) equipped with a magnetic stir bar was charged with Pd(acac)<sub>2</sub> (4.6 mg, 5.0 mol%), BrettPhos (24.2 mg, 15 mol%), nitroarene **1** (0.30 mmol), B<sub>2</sub>pin<sub>2</sub> (114.3 mg, 0.45 mmol), Cs<sub>2</sub>CO<sub>3</sub> (195.5 mg, 0.6 mmol), TBAB (19.3 mg, 20 mol%), and PhCF<sub>3</sub> (1.5 mL) before being sealed with a rubber septum. The reaction mixture was stirred at 130 °C for 18 hours. After the mixture was cooled to room temperature, the

resulting solution was directly filtered. The solvent was evaporated in vacuo to give the crude products. The residue was purified by flash column chromatography on silica gel (PE : EA) to give the desired product **2**.

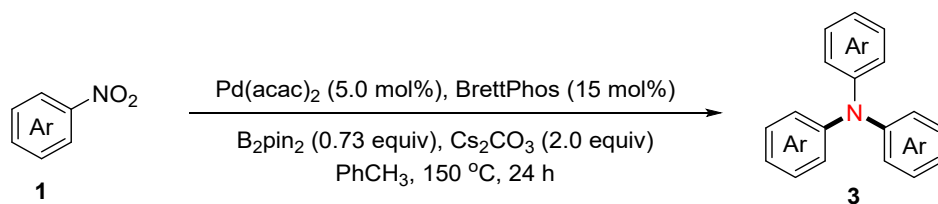

**Procedure B:** In a nitrogen gas filled glovebox, a reaction tube (35 mL) equipped with a magnetic stir bar was charged with Pd(acac)<sub>2</sub> (4.6 mg, 5 mol%), BrettPhos (24.2 mg, 15 mol%), nitroarene **1** (0.30 mmol), B<sub>2</sub>pin<sub>2</sub> (56 mg, 0.22 mmol) Cs<sub>2</sub>CO<sub>3</sub> (195.5 mg, 0.6 mmol), and PhCH<sub>3</sub> (1.0 mL) before being sealed with a rubber septum. The reaction mixture was stirred at 150 °C for 24 hours. After the mixture was cooled to room temperature, the resulting solution was directly filtered. The solvent was evaporated in vacuo to give the crude products. The residue was purified by flash column chromatography on silica gel (PE : EA or PE : DCM) to give the desired product **3**.

## 5. General Procedure for Product 4 or 5

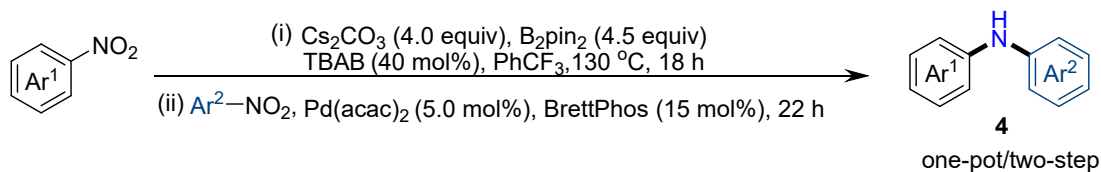

**Procedure C:** In a nitrogen gas filled glovebox, a reaction tube (35 mL) equipped with a magnetic stir bar was charged with nitroarene **Ar**<sup>1</sup> (0.15 mmol), B<sub>2</sub>pin<sub>2</sub> (114.3 mg, 0.45 mmol), Cs<sub>2</sub>CO<sub>3</sub> (130.3 mg, 0.40 mmol), TBAB (12.9 mg, 40 mol%), and PhCF<sub>3</sub> (1.5 mL) before being sealed with a rubber septum. The reaction mixture was stirred at 130 °C for 18 hours. After the mixture was cooled to room temperature, transferred the sealed tube to the glovebox and added Pd(acac)<sub>2</sub> (1.5 mg, 5.0 mol%), BrettPhos (8.1 mg, 15 mol%), and the nitroarene **Ar**<sup>2</sup> (0.10 mmol, 1.0 equiv) to the bottom of the sealed tube via a small filter paper, allowing them to mix thoroughly (Note: when the catalyst and ligand adhere to the reactor inner wall, the desired product yield decreases sharply). Continue stirring the reaction mixture at 130 °C for 22 hours. After the mixture was cooled to room temperature, the resulting solution was directly filtered. The solvent was evaporated in vacuo to give the crude products. The residue was purified by flash column chromatography on silica gel (PE : EA or PE : DCM) to give the desired product **4**.

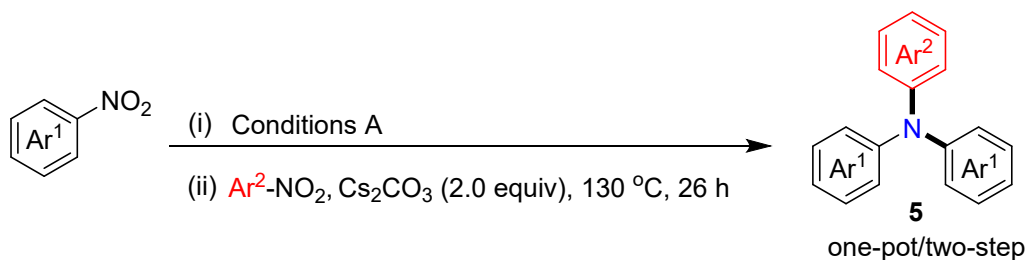

**Procedure D:** In a nitrogen gas filled glovebox, a reaction tube (35 mL) equipped with a magnetic stir bar was charged with Pd(acac)<sub>2</sub> (3.1 mg, 5.0 mol%), BrettPhos (16.1 mg, 15 mol%), nitroarene **Ar**<sup>1</sup> (0.20 mmol, 1.0 equiv), B<sub>2</sub>pin<sub>2</sub> (76 mg, 0.30 mmol), Cs<sub>2</sub>CO<sub>3</sub> (130.3 mg, 0.40 mmol), TBAB (12.9 mg, 20 mol%), and PhCF<sub>3</sub> (1.0 mL) before being sealed with a rubber septum. The reaction mixture was stirred at 130 °C for 18 hours. After the mixture was cooled to room temperature, transferred the sealed tube to the glovebox and added Cs<sub>2</sub>CO<sub>3</sub> (130.3 mg, 0.40 mmol) and the nitroarene **Ar**<sup>2</sup> (0.15 mmol) to the bottom of the sealed tube via a small filter paper, allowing them to mix thoroughly. Continue stirring the reaction mixture at 130 °C for 26 hours. After the mixture was cooled to room temperature, the resulting solution was directly filtered. The solvent was evaporated in vacuo to give the crude products. The residue was purified by flash column chromatography on silica gel (PE : EA or PE : DCM) to give the desired product **5**.

## 6. Mechanistic Studies

### a) Examining the role of palladium catalyst

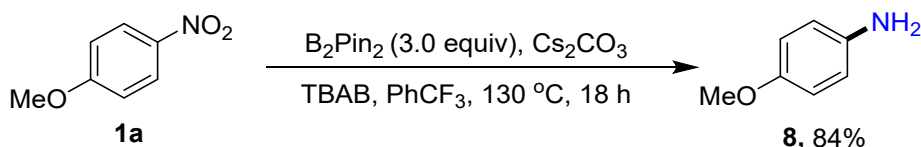

In a nitrogen gas filled glovebox, a reaction tube (35 mL) equipped with a magnetic stir bar was charged with 4-nitroanisole **1a** (46 mg, 0.30 mmol), B<sub>2</sub>pin<sub>2</sub> (228.6 mg, 0.90 mmol), Cs<sub>2</sub>CO<sub>3</sub> (195.5 mg, 0.60 mmol), TBAB (19.3 mg, 20 mol%), and PhCF<sub>3</sub> (3.0 mL) before being sealed with a rubber septum. The reaction mixture was stirred at 130 °C for 18 hours. After the mixture was cooled to room temperature, the resulting solution was directly filtered. The solvent was evaporated in vacuo to give the crude products. The residue was purified by flash column chromatography on silica gel to give the *p*-anisidine **8** as a brown solid in 84 % (31 mg) yield.

### b) Evaluating the role of B<sub>2</sub>Pin<sub>2</sub>

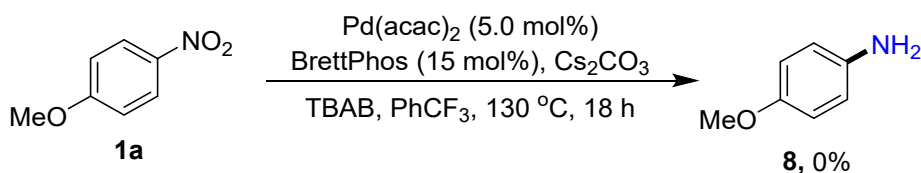



In a nitrogen gas filled glovebox, a reaction tube (35 mL) equipped with a magnetic stir bar was charged with Pd(acac)<sub>2</sub> (4.6 mg, 5.0 mol%), BrettPhos (24.2 mg, 15 mol%), 4-nitroanisole **1a** (46 mg, 0.30 mmol), Cs<sub>2</sub>CO<sub>3</sub> (195.5 mg, 0.60 mmol), TBAB (19.3 mg, 20 mol%), and PhCF<sub>3</sub> (1.5 mL) before being sealed with a rubber septum. The reaction mixture was stirred at 130 °C for 18 hours.

c) Verifying the possible intermediate

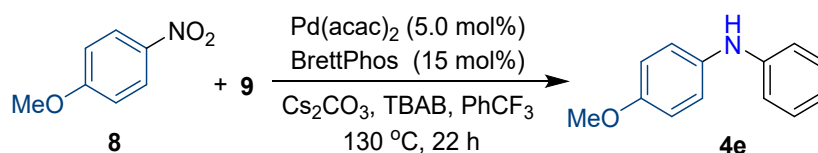

| entry | possible intermediates ( <b>9</b> ) | yield <b>4e</b> (%) |
|-------|-------------------------------------|---------------------|
| 1     | <b>(9a)</b>                         | 62                  |
| 2     | <b>(9b)</b>                         | 0                   |
| 3     | <b>(9c)</b>                         | 0                   |
| 4     | <b>(9d)</b>                         | 0                   |
| 5     | <b>(9e)</b>                         | 0                   |

In a nitrogen gas filled glovebox, a reaction tube (35 mL) equipped with a magnetic stir bar was charged with Pd(acac)<sub>2</sub> (3.1 mg, 5.0 mol%), BrettPhos (16.1 mg, 15 mol%); 4-nitroanisole **1a** (30.6 mg, 0.20 mmol), intermediates **9** (0.30 mmol), Cs<sub>2</sub>CO<sub>3</sub> (260.6 mg, 0.80 mmol), TBAB (25.8 mg, 40 mol%), and PhCF<sub>3</sub> (3.0 mL) before being sealed with a rubber septum. The reaction mixture was stirred at 130 °C for 22 hours. After the mixture was cooled to room temperature, the resulting solution was directly filtered. The solvent was evaporated in vacuo to give the crude products. The residue was purified by flash column chromatography on silica gel to give the desired product **4e**.

## 7. General Procedure for Synthesis of Hole-Transporting Material TCTA

a) Efficient synthesis of the key intermediate of hole-transporting material TCTA

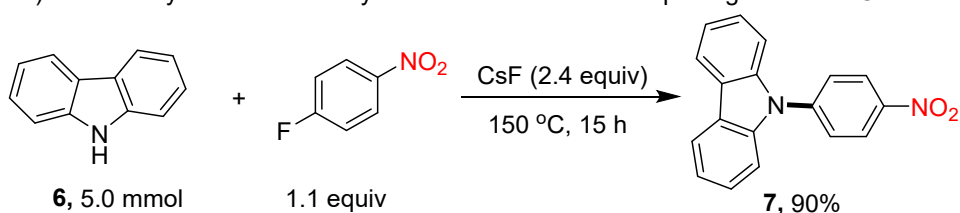

In a nitrogen gas filled glovebox, a reaction tube (35 mL) equipped with a magnetic stir bar was charged with carbazole **6** (835.4 mg, 5.0 mmol), 4-fluoronitrobenzene (775.6 mg, 5.5 mmol), dried cesium fluoride (1822.8 mg, 12 mmol), and DMSO (4.0 mL) before being sealed with a rubber septum. The reaction mixture was stirred at 150 °C for 15 hours. After the mixture was cooled to room temperature, the mixture was poured into 12.5 mL of stirred methanol slowly, and the precipitated yellow crystals. The mixture was filtered, and the product 9-(4-nitrobenzene)-9H-carbazole **7** was obtained with 90% yield.

b) Single-step synthesis of TCTA

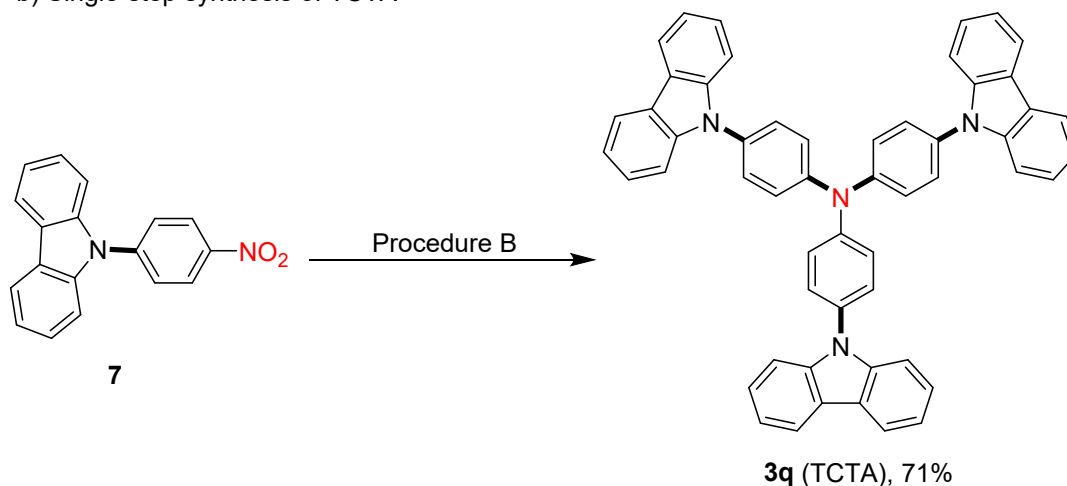

In a nitrogen gas filled glovebox, a reaction tube (35 mL) equipped with a magnetic stir bar was charged with Pd(acac)<sub>2</sub> (4.6 mg, 5 mol%), BrettPhos (24.2 mg, 15 mol%), 9-(4-nitrophenyl)-9H-carbazole **7** (86.5 mg, 0.30 mmol), B<sub>2</sub>pin<sub>2</sub> (56 mg, 0.22 mmol) Cs<sub>2</sub>CO<sub>3</sub> (195.5 mg, 0.6 mmol) and PhCH<sub>3</sub> (1.0 mL) before being sealed with a rubber septum. The reaction mixture was stirred at 150 °C for 24 hours. After the mixture was cooled to room temperature, the resulting solution was directly filtered. The solvent was evaporated in vacuo to give the crude products. The residue was purified by flash column chromatography on silica gel (PE→PE : EA = 100 : 1) to give the desired product **3q** TCTA (52.6 mg, 71%).

## 8. Scale-Up Experiments

In a nitrogen gas filled glovebox, a Schlenk tube (100 mL) equipped with a magnetic stir bar was charged with 1-methoxy-2-nitrobenzene (306.3 mg, 2.0 mmol), Pd(acac)<sub>2</sub> (30.5 mg, 0.10 mmol), BrettPhos (161 mg, 0.30 mmol), Cs<sub>2</sub>CO<sub>3</sub> (1303.3 mg, 4.0 mmol), B<sub>2</sub>pin<sub>2</sub> (761.8 mg, 3.0 mmol), and TBAB (129.0 mg, 0.4 mmol). Then, PhCF<sub>3</sub> (10 mL) was added and the mixture stirred at 130 °C for 18 hours. After the reaction cooled to room temperature, the resulting

solution was directly filtered through a pad of silica by EA. Concentration in vacuo followed by silica gel column purification gave the desired product **2b** in 84 % yield (192.6 mg).

In a nitrogen gas filled glovebox, a Schlenk tube (100 mL) equipped with a magnetic stir bar was charged with nitrobenzene (369.3 mg, 3.0 mmol), Pd(acac)<sub>2</sub> (45.7 mg, 0.15 mmol), BrettPhos (241.5 mg, 0.30 mmol), Cs<sub>2</sub>CO<sub>3</sub> (1995.0 mg, 4.0 mmol), and B<sub>2</sub>pin<sub>2</sub> (558.7 mg, 2.2 mmol). Then, PhCH<sub>3</sub> (10 mL) was added and the mixture stirred at 150 °C for 24 hours. After the reaction cooled to room temperature, the resulting solution was directly filtered through a pad of silica by EA. Concentration in vacuo followed by silica gel column purification gave the desired product **3d** in 79 % yield (193.5 mg).

## 9. Characterization Data of Starting Materials and Products

### Ethyl 1-(4-nitrophenyl)-3-(trifluoromethyl)-1H-pyrazole-4-carboxylate (1x)

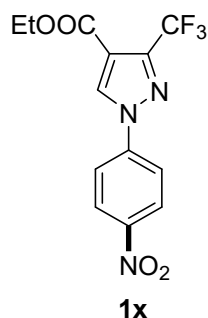

The title compound was prepared according to previously reported literature procedure<sup>1</sup>; <sup>1</sup>H NMR (600 MHz, CDCl<sub>3</sub>) δ 8.39 (d, *J* = 2.2 Hz, 2H), 8.16 (s, 1H), 7.65 (d, *J* = 8.9 Hz, 2H), 4.38 (q, *J* = 7.1 Hz, 2H), 1.38 (t, *J* = 7.1 Hz, 3H); <sup>13</sup>C NMR (151 MHz, CDCl<sub>3</sub>) δ 160.5, 148.2, 143.9, 143.2, 132.70 (q, *J*<sub>C-F</sub> = 40.4 Hz), 126.8, 124.6, 118.90 (q, *J*<sub>C-F</sub> = 271.6 Hz), 117.9, 61.6, 14.0.; <sup>19</sup>F NMR (565 MHz, CDCl<sub>3</sub>) δ -54.95.

### 2,2'-Dimethoxy-3-nitro-1,1'-binaphthalene (1y)

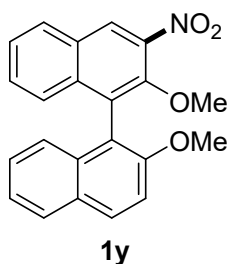

The title compound was prepared according to previously reported literature procedure<sup>1</sup>; <sup>1</sup>H NMR (600 MHz, CDCl<sub>3</sub>) δ 8.86 (d, *J* = 2.4 Hz, 1H), 8.17 (d, *J* = 9.1 Hz, 1H), 8.03 (d, *J* = 9.0 Hz, 1H), 7.96 (dd, *J* = 9.4, 2.4 Hz, 1H), 7.90 (d, *J* = 8.2 Hz, 1H), 7.60 (d, *J* = 9.1 Hz, 1H), 7.48 (d, *J* = 9.1 Hz, 1H), 7.35 (ddd, *J* = 8.0, 6.8, 1.0 Hz, 1H), 7.27 – 7.24 (m, 1H), 7.22 (d, *J* = 9.3 Hz, 1H), 7.05 (d, *J* = 8.5 Hz, 1H), 3.83 (s, 3H), 3.79 (s, 3H); <sup>13</sup>C NMR (151 MHz, CDCl<sub>3</sub>) δ 158.1, 154.8, 143.6, 136.8, 133.6, 131.8, 130.0, 129.1, 128.1, 127.1, 126.68, 126.65, 125.1, 124.6, 123.7, 120.0, 119.6, 117.8, 115.4, 113.8, 56.6, 56.5.

### Bis(4-methoxyphenyl)amine (2a)

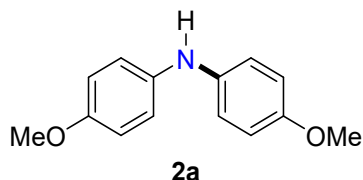

Following the general **Procedure A**, the title compound was isolated by flash column chromatography on silica gel (PE : EA = 20 : 1) as a white solid in 83 % (28.5 mg) yield. The spectral data were in accordance with those reported in the literature<sup>2</sup>. <sup>1</sup>H NMR (600 MHz, CDCl<sub>3</sub>) δ 6.95 (d, *J* = 8.9 Hz, 4H), 6.84 (d, *J* = 8.9 Hz, 4H), 5.31 (s, 1H), 3.79 (s, 6H); <sup>13</sup>C NMR (151 MHz, CDCl<sub>3</sub>) δ 154.2, 137.9, 119.5, 114.7, 55.6.

### Di-*p*-tolylamine (2b)

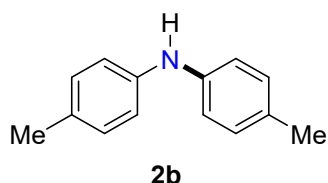

Following the general **Procedure A**, the title compound was isolated by flash column chromatography on silica gel (PE : EA = 100 : 1) as a white solid in 85 % (25.2 mg) yield; The spectral data were in accordance with those reported in the literature<sup>3</sup>. **<sup>1</sup>H NMR** (600 MHz, CDCl<sub>3</sub>) δ 7.08 (d, *J* = 8.1 Hz, 4H), 6.96 (d, *J* = 8.4 Hz, 4H), 5.52 (s, 1H), 2.31 (s, 6H); **<sup>13</sup>C NMR** (151 MHz, CDCl<sub>3</sub>) δ 141.1, 130.1, 129.8, 117.9, 20.6.

### Diphenylamine (2c)

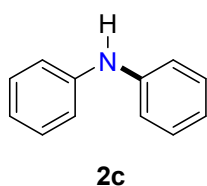

Following the general **Procedure A**, the title compound was isolated by flash column chromatography on silica gel (PE) as a light yellow oil in 85 % (21.6 mg) yield; The spectral data were in accordance with those reported in the literature<sup>3</sup>. **<sup>1</sup>H NMR** (600 MHz, CDCl<sub>3</sub>) δ 7.32 – 7.26 (m, 4H), 7.09 (d, *J* = 7.5 Hz, 4H), 6.95 (t, *J* = 7.5 Hz, 2H), 5.71 (s, 1H); **<sup>13</sup>C NMR** (151 MHz, CDCl<sub>3</sub>) δ 143.1, 129.3, 121.0, 117.8.

### Dis(4-fluorophenyl)amine (2d)

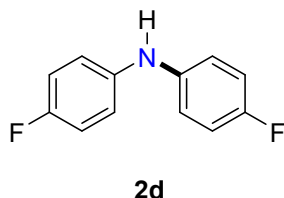

Following the general **Procedure A**, the title compound was isolated by flash column chromatography on silica gel (PE : EA = 25 : 1) as a light yellow oil in 32 % (9.8 mg) yield. The spectral data were in accordance with those reported in the literature<sup>3</sup>. **<sup>1</sup>H NMR** (600 MHz, CDCl<sub>3</sub>) δ 7.00 – 6.92 (m, 8H), 5.49 (s, 1H); **<sup>13</sup>C NMR** (151 MHz, CDCl<sub>3</sub>) δ 157.8 (d, *J*<sub>C-F</sub> = 239.6 Hz), 139.7 (d, *J*<sub>C-F</sub> = 2.5 Hz), 119.4 (d, *J*<sub>C-F</sub> = 7.7 Hz), 116.0 (d, *J*<sub>C-F</sub> = 22.6 Hz); **<sup>19</sup>F NMR** (565 MHz, CDCl<sub>3</sub>) δ -122.59.

### Bis(4-phenoxyphenyl)amine (2e)

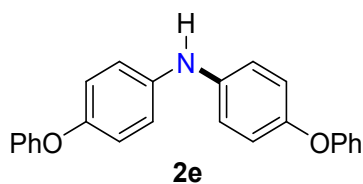

Following the general **Procedure A**, the title compound was isolated by flash column chromatography on silica gel (PE : EA = 200 : 1) as a white solid in 79 % (41.9 mg) yield.  $^1\text{H NMR}$  (600 MHz,  $\text{CDCl}_3$ )  $\delta$  7.34 (dd,  $J = 8.6, 7.3$  Hz, 4H), 7.08 (t,  $J = 7.4$  Hz, 2H), 7.06 – 7.03 (m, 4H), 7.02 (dd,  $J = 8.7, 1.1$  Hz, 4H), 7.00 – 6.97 (m, 4H), 5.56 (s, 1H);  $^{13}\text{C NMR}$  (151 MHz,  $\text{CDCl}_3$ )  $\delta$  158.2, 150.7, 139.6, 129.6, 122.5, 120.6, 119.2, 117.8; **m.p.:** 102-104 °C; **HRMS** (APCI) calcd for  $\text{C}_{24}\text{H}_{19}\text{NO}_2$  [ $\text{M} + \text{H}^+$ ], 354.1489; found: 354.1488.

#### Bis(4-(trifluoromethyl)phenyl)amine (2f)

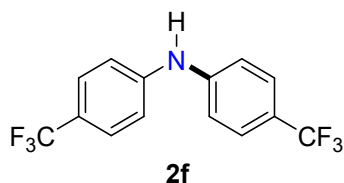

Following the general **Procedure A**, the title compound was isolated by flash column chromatography on silica gel (PE : EA = 20 : 1) as a light yellow solid in 64 % (29.3 mg) yield. The spectral data were in accordance with those reported in the literature<sup>2</sup>.  $^1\text{H NMR}$  (600 MHz,  $\text{CDCl}_3$ )  $\delta$  7.55 (d,  $J = 8.4$  Hz, 4H), 7.16 (d,  $J = 8.4$  Hz, 4H), 6.12 (s, 1H);  $^{13}\text{C NMR}$  (151 MHz,  $\text{CDCl}_3$ )  $\delta$  144.8, 126.8 (q,  $J_{\text{C-F}} = 3.8$  Hz), 124.3 (q,  $J_{\text{C-F}} = 271.0$  Hz), 123.5 (q,  $J_{\text{C-F}} = 33.0$  Hz), 117.4;  $^{19}\text{F NMR}$  (565 MHz,  $\text{CDCl}_3$ )  $\delta$  -61.75.

#### Di([1,1'-biphenyl]-3-yl)amine (2g)

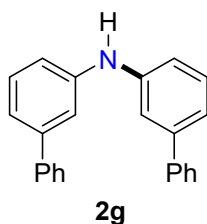

Following the general **Procedure A**, the title compound was isolated by flash column chromatography on silica gel (PE : EA = 200 : 1 → 100 : 1) as a yellow oil in 75 % (36.2 mg) yield. The spectral data were in accordance with those reported in the literature<sup>4</sup>.  $^1\text{H NMR}$  (600 MHz,  $\text{CDCl}_3$ )  $\delta$  7.67 (d,  $J = 6.8$  Hz, 4H), 7.59 – 7.47 (m, 4H), 7.46 – 7.33 (m, 6H), 7.27 (d,  $J = 6.9$  Hz, 2H), 7.18 (d,  $J = 7.6$  Hz, 2H), 5.88 (s, 1H);  $^{13}\text{C NMR}$  (151 MHz,  $\text{CDCl}_3$ )  $\delta$  143.4, 142.5, 141.0, 129.7, 128.7, 127.3, 127.1, 120.0, 116.71, 116.67.

#### Di-*m*-tolylamine (2h)

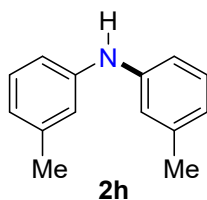

Following the general **Procedure A**, the title compound was isolated by flash column chromatography on silica gel (PE : EA = 200 : 1 → 100 : 1) as a light yellow oil in 89 % (26.3 mg) yield; The spectral data were in accordance with those reported in the literature<sup>3</sup>;  $^1\text{H NMR}$  (600

MHz, CDCl<sub>3</sub>)  $\delta$  7.18 (t,  $J$  = 7.7 Hz, 2H), 6.91 (d,  $J$  = 7.4 Hz, 4H), 6.77 (d,  $J$  = 7.4 Hz, 2H), 5.63 (s, 1H), 2.34 (s, 6H); <sup>13</sup>C NMR (151 MHz, CDCl<sub>3</sub>)  $\delta$  143.2, 139.1, 129.1, 121.7, 118.5, 114.9, 21.5.

#### Dimethyl 3,3'-azanediyldibenzoate (2i)

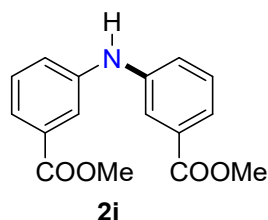

Following the general **Procedure A**, the title compound was isolated by flash column chromatography on silica gel (PE : EA = 10 : 1) as a white solid in 54 % (23.1 mg) yield. The spectral data were in accordance with those reported in the literature<sup>5</sup>. <sup>1</sup>H NMR (600 MHz, CDCl<sub>3</sub>)  $\delta$  7.73 – 7.71 (m, 2H), 7.62 (dt,  $J$  = 7.6, 1.3 Hz, 2H), 7.34 (t,  $J$  = 7.8 Hz, 2H), 7.28 (ddd,  $J$  = 8.1, 2.5, 1.1 Hz, 2H), 6.03 (s, 1H), 3.90 (s, 6H); <sup>13</sup>C NMR (151 MHz, CDCl<sub>3</sub>)  $\delta$  166.9, 142.9, 131.4, 129.4, 122.5, 122.0, 118.9, 52.2.

#### Bis(3-(trifluoromethoxy)phenyl)amine (2j)

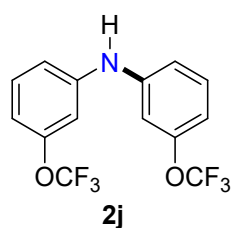

Following the general **Procedure A**, the title compound was isolated by flash column chromatography on silica gel (PE : EA = 20 : 1) as a yellow oil in 80 % (40.5 mg) yield. <sup>1</sup>H NMR (600 MHz, CDCl<sub>3</sub>)  $\delta$  7.29 (t,  $J$  = 8.2 Hz, 2H), 6.98 (ddd,  $J$  = 8.2, 2.2, 0.9 Hz, 2H), 6.94 (s, 2H), 6.83 (d,  $J$  = 8.0 Hz, 2H), 5.88 (s, 1H); <sup>13</sup>C NMR (151 MHz, CDCl<sub>3</sub>)  $\delta$  150.3, 143.7, 130.6, 120.4 (q,  $J_{C-F}$  = 257.2 Hz), 116.1, 113.7, 110.3; <sup>19</sup>F NMR (565 MHz, CDCl<sub>3</sub>)  $\delta$  -57.77; HRMS (APCI) calcd for C<sub>14</sub>H<sub>9</sub>F<sub>6</sub>NO<sub>2</sub> [M + H<sup>+</sup>], 338.0610; found: 338.0602.

#### Bis(4-(tert-butyl)phenyl)amine (2k)

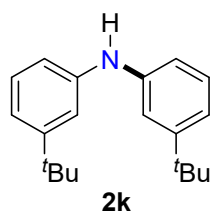

Following the general **Procedure A**, the title compound was isolated by flash column chromatography on silica gel (PE : EA = 100 : 1) as a light yellow oil in 84 % (35.5 mg) yield. The spectral data were in accordance with those reported in the literature<sup>6</sup>. <sup>1</sup>H NMR (600 MHz, CDCl<sub>3</sub>)  $\delta$  7.23 (t,  $J$  = 7.9 Hz, 2H), 7.17 (t,  $J$  = 2.1 Hz, 2H), 6.99 (d,  $J$  = 7.8 Hz, 2H), 6.91 (ddd,  $J$

= 7.9, 2.3, 1.0 Hz, 2H), 5.77 (s, 1H), 1.34 (s, 18H);  $^{13}\text{C}$  NMR (151 MHz,  $\text{CDCl}_3$ )  $\delta$  152.5, 142.9, 128.9, 117.9, 115.0, 114.8, 34.7, 31.3.

#### Di-*o*-tolylamine (2l)

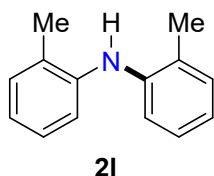

Following the general **Procedure A**, the title compound was isolated by flash column chromatography on silica gel (PE : EA = 100 : 1) as a light yellow oil in 91 % (26.9 mg) yield; The spectral data were in accordance with those reported in the literature<sup>7</sup>;  $^1\text{H}$  NMR (600 MHz,  $\text{CDCl}_3$ )  $\delta$  7.23 (d,  $J$  = 7.1 Hz, 2H), 7.15 (t,  $J$  = 6.8 Hz, 2H), 7.02 (d,  $J$  = 7.4 Hz, 2H), 6.94 (t,  $J$  = 6.9 Hz, 2H), 5.17 (s, 1H), 2.30 (s, 6H);  $^{13}\text{C}$  NMR (151 MHz,  $\text{CDCl}_3$ )  $\delta$  141.9, 130.8, 127.5, 126.8, 121.3, 118.2, 17.8.

#### Bis(2-methoxyphenyl)amine (2m)

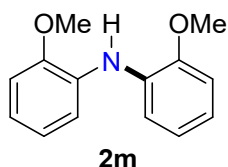

Following the general **Procedure A**, the title compound was isolated by flash column chromatography on silica gel (PE : EA = 200 : 1) as a colorless oil in 85 % (29.2 mg) yield. The spectral data were in accordance with those reported in the literature<sup>7</sup>.  $^1\text{H}$  NMR (600 MHz,  $\text{CDCl}_3$ )  $\delta$  7.46 – 7.35 (m, 2H), 7.04 – 6.84 (m, 6H), 6.52 (s, 1H), 3.92 (s, 6H);  $^{13}\text{C}$  NMR (151 MHz,  $\text{CDCl}_3$ )  $\delta$  148.9, 132.4, 120.7, 120.1, 115.4, 110.5, 55.6.

#### Bis(3,5-dimethylphenyl)amine (2n)

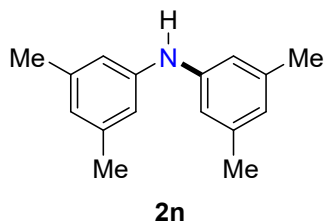

Following the general **Procedure A**, the title compound was isolated by flash column chromatography on silica gel (PE : EA = 200 : 1 → 100 : 1) as a light yellow oil in 84 % (28.4 mg) yield. The spectral data were in accordance with those reported in the literature<sup>3</sup>.  $^1\text{H}$  NMR (600 MHz,  $\text{CDCl}_3$ )  $\delta$  6.73 (s, 4H), 6.62 (s, 2H), 5.54 (s, 1H), 2.31 (s, 12H);  $^{13}\text{C}$  NMR (151 MHz,  $\text{CDCl}_3$ )  $\delta$  143.2, 138.9, 122.7, 115.7, 21.4.

#### Di(naphthalen-1-yl)amine (2o)



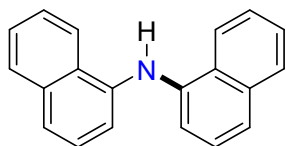

**2o**

Following the general **Procedure A**, the title compound was isolated by flash column chromatography on silica gel (PE : EA = 250 : 1) as a pink solid in 79 % (31.9 mg) yield. The spectral data were in accordance with those reported in the literature<sup>7</sup>. **<sup>1</sup>H NMR** (600 MHz, CDCl<sub>3</sub>) δ 8.11 (d, *J* = 8.4 Hz, 2H), 7.96 – 7.90 (m, 2H), 7.61 – 7.53 (m, 4H), 7.50 (t, *J* = 6.8 Hz, 2H), 7.37 (td, *J* = 7.5, 3.2 Hz, 2H), 7.06 (dd, *J* = 7.5, 4.2 Hz, 2H), 6.36 (s, 1H); **<sup>13</sup>C NMR** (151 MHz, CDCl<sub>3</sub>) δ 140.3, 134.6, 128.6, 126.9, 126.2, 126.1, 125.6, 122.4, 121.8, 115.4.

**Bis(3,4-dimethylphenyl)amine (2p)**

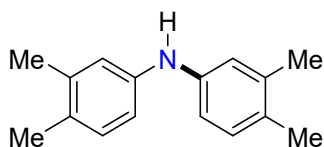

**2p**

Following the general **Procedure A**, the title compound was isolated by flash column chromatography on silica gel (PE : EA = 100 : 1) as a yellow oil in 76 % (25.7 mg) yield. The spectral data were in accordance with those reported in the literature<sup>8</sup>. **<sup>1</sup>H NMR** (600 MHz, CDCl<sub>3</sub>) δ 7.04 (d, *J* = 8.0 Hz, 2H), 6.87 (d, *J* = 2.5 Hz, 2H), 6.84 (dd, *J* = 8.0, 2.5 Hz, 2H), 5.46 (s, 1H), 2.24 (d, *J* = 6.4 Hz, 12H); **<sup>13</sup>C NMR** (151 MHz, CDCl<sub>3</sub>) δ 141.5, 137.4, 130.2, 128.8, 119.4, 115.2, 19.9, 18.9.

**Bis(4-methoxy-3-methylphenyl)amine (2q)**

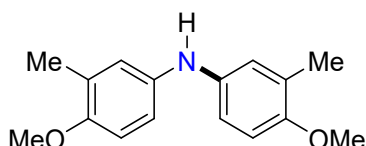

**2q**

Following the general **Procedure A**, the title compound was isolated by flash column chromatography on silica gel (PE : EA = 100 : 1) as a white solid in 75 % (28.9 mg) yield. The spectral data were in accordance with those reported in the literature<sup>8</sup>. **<sup>1</sup>H NMR** (600 MHz, CDCl<sub>3</sub>) δ 6.82 (d, *J* = 7.1 Hz, 4H), 6.75 (d, *J* = 9.2 Hz, 2H), 5.21 (s, 1H), 3.81 (s, 6H), 2.21 (s, 6H); **<sup>13</sup>C NMR** (151 MHz, CDCl<sub>3</sub>) δ 152.4, 137.6, 127.6, 121.4, 116.2, 111.1, 55.8, 16.3.

**Bis(2-methoxypyridin-3-yl)amine (2r)**

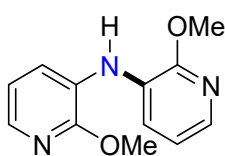

**2r**

Following the general **Procedure A**, the title compound was isolated by flash column chromatography on silica gel (PE : EA = 20 : 1) as a white solid in 92 % (31.9 mg) yield. **<sup>1</sup>H NMR** (600 MHz, CDCl<sub>3</sub>) δ 7.70 (dd, *J* = 5.0, 1.6 Hz, 2H), 7.48 (dd, *J* = 7.7, 1.6 Hz, 2H), 6.82 (dd, *J* = 7.7, 5.0 Hz, 2H), 6.45 (s, 1H), 4.04 (s, 6H); **<sup>13</sup>C NMR** (151 MHz, CDCl<sub>3</sub>) δ 154.1, 136.9, 126.5, 120.3, 116.7, 53.6; **m.p.:** 60-62 °C; HRMS (APCI) calcd for C<sub>12</sub>H<sub>13</sub>N<sub>3</sub>O<sub>2</sub> [M + H<sup>+</sup>], 232.1081; found: 232.1076.

#### Bis(4-methoxy-3,5-dimethylphenyl)amine (2s)

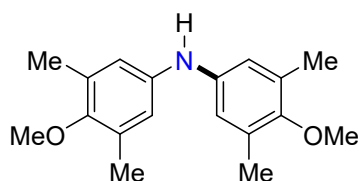

**2s**

Following the general **Procedure A**, the title compound was isolated by flash column chromatography on silica gel (PE : EA = 100 : 1) as a colorless oil in 82 % (35.1 mg) yield. The spectral data were in accordance with those reported in the literature<sup>4</sup>. **<sup>1</sup>H NMR** (600 MHz, CDCl<sub>3</sub>) δ 6.69 (s, 4H), 5.31 (s, 1H), 3.72 (s, 6H), 2.26 (s, 12H); **<sup>13</sup>C NMR** (151 MHz, CDCl<sub>3</sub>) δ 151.1, 139.5, 131.5, 118.1, 59.9, 16.2.

#### Bis(9,9-dimethyl-9H-fluoren-2-yl)amine (2t)

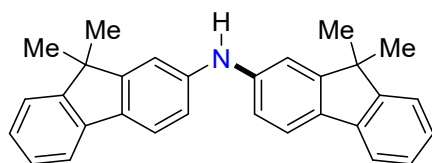

**2t**

Following the general **Procedure A**, the title compound was isolated by flash column chromatography on silica gel (PE : EA = 100 : 1) as a white solid in 86 % (51.8 mg) yield. The spectral data were in accordance with those reported in the literature<sup>9</sup>. **<sup>1</sup>H NMR** (600 MHz, CDCl<sub>3</sub>) δ 7.69 (t, *J* = 8.4 Hz, 4H), 7.46 (d, *J* = 7.4 Hz, 2H), 7.38 (td, *J* = 7.4, 1.2 Hz, 2H), 7.31 (td, *J* = 7.4, 1.2 Hz, 2H), 7.28 (d, *J* = 2.2 Hz, 2H), 7.12 (dd, *J* = 8.1, 2.1 Hz, 2H), 5.96 (s, 1H), 1.54 (s, 12H); **<sup>13</sup>C NMR** (151 MHz, CDCl<sub>3</sub>) δ 155.3, 153.0, 142.7, 139.2, 132.5, 126.9, 126.0, 122.4, 120.9, 119.0, 116.9, 112.2, 46.7, 27.2.

#### Bis(benzo[*d*][1,3]dioxol-5-yl)amine (2u)

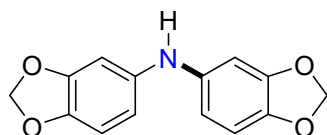

**2u**

Following the general **Procedure A**, the title compound was isolated by flash column chromatography on silica gel (PE : EA = 20 : 1) as a yellow oil in 57 % (22 mg) yield. **<sup>1</sup>H NMR** (600 MHz, CDCl<sub>3</sub>) δ 6.70 (d, *J* = 8.2 Hz, 2H), 6.58 (d, *J* = 2.2 Hz, 2H), 6.42 (dd, *J* = 8.3, 2.3 Hz,

2H), 5.91 (s, 4H), 5.31 (s, 1H);  $^{13}\text{C}$  NMR (151 MHz,  $\text{CDCl}_3$ )  $\delta$  148.2, 142.1, 139.0, 110.9, 108.5, 100.93, 100.89; HRMS (APCI) calcd for  $\text{C}_{14}\text{H}_{11}\text{NO}_4$  [ $\text{M} + \text{H}^+$ ], 258.0761; found: 258.0756.

**Bis(2,3-dihydrobenzofuran-5-yl)amine (2v)**

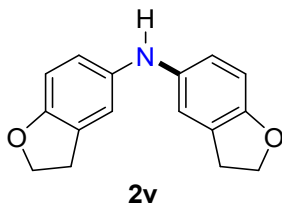

Following the general **Procedure A**, the title compound was isolated by flash column chromatography on silica gel (PE : EA = 10 : 1) as a yellow solid in 73 % (27.7 mg) yield.  $^1\text{H}$  NMR (600 MHz,  $\text{CDCl}_3$ )  $\delta$  6.89 – 6.86 (m, 2H), 6.73 (dd,  $J$  = 8.3, 2.3 Hz, 2H), 6.68 (d,  $J$  = 8.4 Hz, 2H), 5.20 (s, 1H), 4.54 (t,  $J$  = 8.6 Hz, 4H), 3.16 (t,  $J$  = 8.6 Hz, 4H);  $^{13}\text{C}$  NMR (151 MHz,  $\text{CDCl}_3$ )  $\delta$  154.7, 138.4, 127.8, 118.4, 115.9, 109.4, 71.1, 30.1; **m.p.**: 96-98 °C; HRMS (APCI) calcd for  $\text{C}_{16}\text{H}_{15}\text{O}_2$  [ $\text{M} + \text{H}^+$ ], 254.1176; found: 254.1170.

**Bis(4-(9H-carbazol-9-yl)phenyl)amine (2w)**

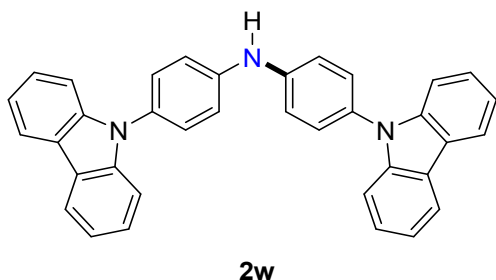

Following the general **Procedure A**, the title compound was isolated by flash column chromatography on silica gel (PE : EA = 20 : 1) as a white solid in 75 % (56.2 mg) yield. The spectral data were in accordance with those reported in the literature<sup>10</sup>.  $^1\text{H}$  NMR (600 MHz,  $\text{CDCl}_3$ )  $\delta$  8.23 (d,  $J$  = 7.8 Hz, 4H), 7.54 – 7.46 (m, 12H), 7.36 (tt,  $J$  = 6.4, 2.1 Hz, 8H), 5.96 (s, 1H);  $^{13}\text{C}$  NMR (151 MHz,  $\text{CDCl}_3$ )  $\delta$  142.0, 141.2, 130.7, 128.3, 125.9, 123.1, 120.3, 119.7, 118.8, 109.7.

**Biethyl 1,1'-(azanediybis(4,1-phenylene))bis(3-(trifluoromethyl)-1H-pyrazole-4-carboxylate) (2x)**

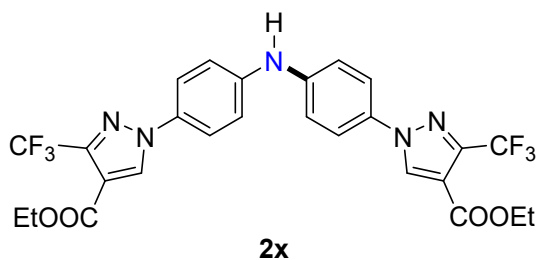

Following the general **Procedure A**, the title compound was isolated by flash column chromatography on silica gel (PE : EA = 10 : 1 → 5 : 1) as a white solid in 64 % (55.8 mg) yield.  $^1\text{H}$  NMR (600 MHz,  $\text{CDCl}_3$ )  $\delta$  8.10 (s, 2H), 7.32 (d,  $J$  = 8.7 Hz, 4H), 7.17 (d,  $J$  = 8.8 Hz, 4H),

6.36 (s, 1H), 4.37 (q,  $J = 7.1$  Hz, 4H), 1.38 (t,  $J = 7.2$  Hz, 6H);  $^{13}\text{C}$  NMR (151 MHz,  $\text{CDCl}_3$ )  $\delta$  161.0, 143.5, 142.2, 132.6, 132.5 (q,  $J_{\text{C-F}} = 40.0$  Hz), 127.1, 119.1 (q,  $J_{\text{C-F}} = 271.4$  Hz), 117.7, 116.4, 61.3, 14.0.  $^{19}\text{F}$  NMR (565 MHz,  $\text{CDCl}_3$ )  $\delta$  -55.49; **m.p.:** 108-110 °C; **HRMS** (APCI) calcd for  $\text{C}_{26}\text{H}_{21}\text{F}_6\text{N}_5\text{O}_4$  [ $\text{M} + \text{H}^+$ ], 582.1570; found: 582.1561.

### Bis(2,2'-dimethoxy-[1,1'-binaphthalen]-3-yl)amine (2y)

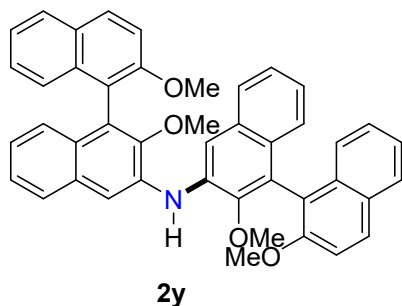

Following the general **Procedure A**, the title compound was isolated by flash column chromatography on silica gel (PE : DCM = 2 : 1  $\rightarrow$  DCM) as a white solid in 72 % (69.3 mg) yield.  $^1\text{H}$  NMR (600 MHz,  $\text{DMSO-}d_6$ )  $\delta$  8.38 (s, 1H), 8.04 (d,  $J = 9.0$  Hz, 2H), 7.93 (d,  $J = 8.2$  Hz, 2H), 7.88 (d,  $J = 9.1$  Hz, 2H), 7.67 (d,  $J = 2.2$  Hz, 2H), 7.58 (d,  $J = 9.2$  Hz, 2H), 7.48 (d,  $J = 9.2$  Hz, 2H), 7.31 (ddd,  $J = 8.1, 6.7, 1.2$  Hz, 2H), 7.23 (ddd,  $J = 8.2, 6.7, 1.3$  Hz, 2H), 7.15 (dd,  $J = 9.1, 2.3$  Hz, 2H), 7.01 (dd,  $J = 8.5, 1.1$  Hz, 2H), 6.87 (d,  $J = 9.1$  Hz, 2H), 3.73 (s, 6H), 3.65 (s, 6H);  $^{13}\text{C}$  NMR (151 MHz,  $\text{DMSO-}d_6$ )  $\delta$  155.1, 153.3, 139.8, 133.9, 130.5, 129.7, 129.2, 129.0, 128.4, 128.2, 126.8, 126.1, 125.1, 123.8, 121.4, 119.4, 119.3, 115.2, 114.7, 110.6, 56.8, 56.6; **m.p.:** 274-275 °C; **HRMS** (APCI) calcd for  $\text{C}_{44}\text{H}_{35}\text{NO}_4$  [ $\text{M} + \text{H}^+$ ], 642.2639; found: 642.2627.

### Tris(4-methoxyphenyl)amine (3a)

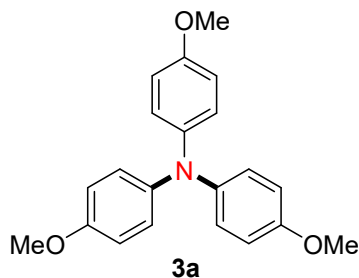

Following the general **Procedure B**, the title compound was isolated by flash column chromatography on silica gel (PE : EA = 100 : 1) as a light yellow solid in 70 % (23.4 mg) yield. The spectral data were in accordance with those reported in the literature<sup>7</sup>.  $^1\text{H}$  NMR (600 MHz,  $\text{CDCl}_3$ )  $\delta$  7.00 (d,  $J = 9.0$  Hz, 6H), 6.82 (d,  $J = 9.0$  Hz, 6H), 3.80 (s, 9H);  $^{13}\text{C}$  NMR (151 MHz,  $\text{CDCl}_3$ )  $\delta$  154.8, 141.9, 124.7, 114.4, 55.4.

### Tri-*p*-tolylamine (3b)

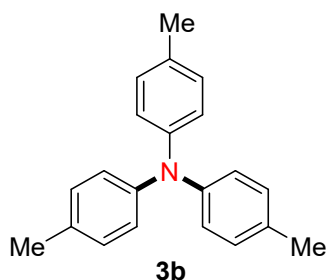

Following the general **Procedure B**, the title compound was isolated by flash column chromatography on silica gel (PE) as a colourless oil in 65 % (18.7 mg) yield; The spectral data were in accordance with those reported in the literature<sup>7</sup>. **<sup>1</sup>H NMR** (600 MHz, CDCl<sub>3</sub>) δ 7.05 (d, *J* = 7.9 Hz, 6H), 6.97 (d, *J* = 8.5 Hz, 6H), 2.31 (s, 9H); **<sup>13</sup>C NMR** (151 MHz, CDCl<sub>3</sub>) δ 145.7, 131.7, 129.7, 123.8, 20.7.

### Triphenylamine (3c)

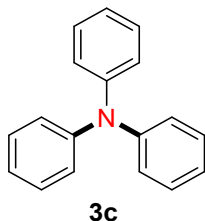

Following the general **Procedure B**, the title compound was isolated by flash column chromatography on silica gel (PE) as a white solid in 77 % (18.9 mg) yield; The spectral data were in accordance with those reported in the literature<sup>7</sup>. **<sup>1</sup>H NMR** (600 MHz, CDCl<sub>3</sub>) δ 7.25 (t, *J* = 7.9 Hz, 6H), 7.10 (d, *J* = 8.6 Hz, 6H), 7.01 (t, *J* = 7.3 Hz, 3H); **<sup>13</sup>C NMR** (151 MHz, CDCl<sub>3</sub>) δ 147.8, 129.2, 124.1, 122.6.

### Tris(4-phenoxyphenyl)amine (3d)

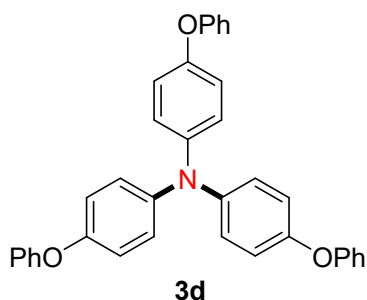

Following the general **Procedure B**, the title compound was isolated by flash column chromatography on silica gel (PE) as a white solid in 65 % (33.9 mg) yield. The spectral data were in accordance with those reported in the literature<sup>11</sup>. **<sup>1</sup>H NMR** (600 MHz, CDCl<sub>3</sub>) δ 7.38 – 7.29 (m, 6H), 7.09 (dd, *J* = 13.4, 8.1 Hz, 9H), 7.04 (d, *J* = 7.9 Hz, 6H), 6.94 (d, *J* = 8.9 Hz, 6H); **<sup>13</sup>C NMR** (151 MHz, CDCl<sub>3</sub>) δ 157.6, 152.2, 143.6, 129.7, 125.0, 122.9, 120.0, 118.4.

### Tris(4-fluorophenyl)amine (3e)

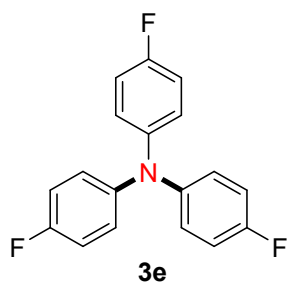

Following the general **Procedure B**, the title compound was isolated by flash column chromatography on silica gel (PE) as a white solid in 29 % (8.7 mg) yield. The spectral data were in accordance with those reported in the literature<sup>3</sup>. **<sup>1</sup>H NMR** (600 MHz, CDCl<sub>3</sub>) δ 7.08 – 6.69 (m, 12H); **<sup>13</sup>C NMR** (151 MHz, CDCl<sub>3</sub>) δ 158.6 (d,  $J_{C-F}$  = 243.1 Hz), 144.0 (d,  $J_{C-F}$  = 2.8 Hz), 125.2 (d,  $J_{C-F}$  = 8.1 Hz), 116.1 (d,  $J_{C-F}$  = 22.6 Hz); **<sup>19</sup>F NMR** (565 MHz, CDCl<sub>3</sub>) δ -120.08.

#### Triethyl 4,4',4''-nitritotribenzoate (**3f**)

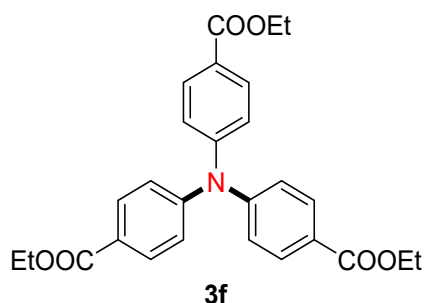

Following the general **Procedure B**, the title compound was isolated by flash column chromatography on silica gel (PE : EA = 20 : 1 → 10 : 1) as a white solid in 48 % (22.1 mg) yield. The spectral data were in accordance with those reported in the literature<sup>12</sup>. **<sup>1</sup>H NMR** (600 MHz, CDCl<sub>3</sub>) δ 7.95 (d,  $J$  = 8.7 Hz, 6H), 7.11 (d,  $J$  = 8.7 Hz, 6H), 4.36 (q,  $J$  = 7.1 Hz, 6H), 1.38 (t,  $J$  = 7.2 Hz, 9H); **<sup>13</sup>C NMR** (151 MHz, CDCl<sub>3</sub>) δ 165.9, 150.3, 131.1, 125.8, 123.7, 60.9, 14.3.

#### Tris(3-(*tert*-butyl)phenyl)amine (**3g**)

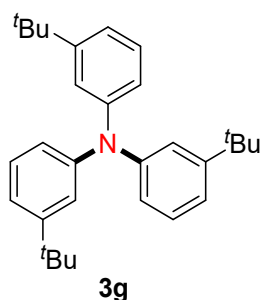

Following the general **Procedure B**, the title compound was isolated by flash column chromatography on silica gel (PE) as a colorless oil in 65 % (26.9 mg) yield. **<sup>1</sup>H NMR** (600 MHz, CDCl<sub>3</sub>) δ 7.20 (s, 3H), 7.17 (t,  $J$  = 7.9 Hz, 3H), 7.03 (d,  $J$  = 7.9 Hz, 3H), 6.87 (d,  $J$  = 9.2 Hz, 3H), 1.26 (s, 27H); **<sup>13</sup>C NMR** (151 MHz, CDCl<sub>3</sub>) δ 152.0, 147.7, 128.5, 121.25, 121.15, 119.2, 34.7, 31.3; **HRMS** (APCI) calcd for C<sub>30</sub>H<sub>39</sub>N [M + H<sup>+</sup>], 414.3155; found: 414.3147.

#### Tri-*m*-tolylamine (**3h**)

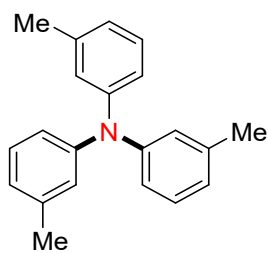

**3h**

Following the general **Procedure B**, the title compound was isolated by flash column chromatography on silica gel (PE) as a colourless oil in 74 % (21.2 mg) yield; The spectral data were in accordance with those reported in the literature<sup>7</sup>. **<sup>1</sup>H NMR** (600 MHz, CDCl<sub>3</sub>) δ 7.14 (t, *J* = 7.8 Hz, 3H), 6.92 (s, 3H), 6.89 (d, *J* = 7.9 Hz, 3H), 6.84 (d, *J* = 7.4 Hz, 3H), 2.28 (s, 9H); **<sup>13</sup>C NMR** (151 MHz, CDCl<sub>3</sub>) δ 148.0, 138.9, 128.9, 124.8, 123.3, 121.4, 21.4.

### Tri([1,1'-biphenyl]-3-yl)amine (3i)

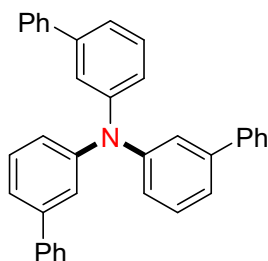

**3i**

Following the general **Procedure B**, the title compound was isolated by flash column chromatography on silica gel (PE) as a white solid in 66 % (31.3 mg) yield. **<sup>1</sup>H NMR** (600 MHz, CDCl<sub>3</sub>) δ 7.61 – 7.56 (m, 6H), 7.50 (t, *J* = 2.0 Hz, 3H), 7.43 (dd, *J* = 8.4, 7.0 Hz, 6H), 7.39 (d, *J* = 7.9 Hz, 3H), 7.36 (dt, *J* = 14.7, 1.3 Hz, 3H), 7.33 (dt, *J* = 7.7, 1.3 Hz, 3H), 7.22 (ddd, *J* = 8.0, 2.3, 1.1 Hz, 3H); **<sup>13</sup>C NMR** (151 MHz, CDCl<sub>3</sub>) δ 148.2, 142.4, 140.8, 129.7, 128.7, 127.3, 127.0, 123.1, 122.9, 121.7; **m.p.:** 145-147 °C; **HRMS** (APCI) calcd for C<sub>36</sub>H<sub>27</sub>N [M + H<sup>+</sup>], 474.2216; found: 474.2208.

### Trimethyl 3,3',3''-nitritotribenzoate (3j)

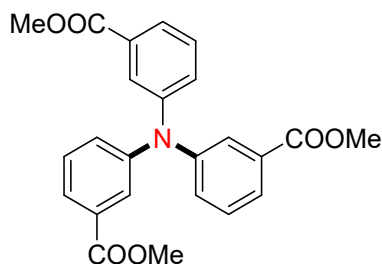

**3j**

Following the general **Procedure B**, the title compound was isolated by flash column chromatography on silica gel (PE : EA = 20 : 1 → 10 : 1) as a white solid in 56 % (23.4 mg) yield. **<sup>1</sup>H NMR** (500 MHz, CDCl<sub>3</sub>) δ 7.76 – 7.68 (m, 6H), 7.34 (t, *J* = 7.8 Hz, 3H), 7.25 (ddd, *J* = 8.1, 2.5, 1.3 Hz, 3H), 3.86 (s, 9H); **<sup>13</sup>C NMR** (126 MHz, CDCl<sub>3</sub>) δ 166.6, 147.4, 131.8, 129.7, 128.5,

125.0, 124.6, 52.2; **m.p.:** 176-177 °C; **HRMS** (APCI) calcd for C<sub>24</sub>H<sub>21</sub>NO<sub>6</sub> [M + H<sup>+</sup>], 420.1442; found: 420.1441.

**Tris(4-methoxy-3,5-dimethylphenyl)amine (3k)**

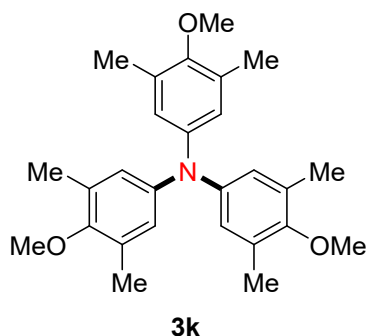

Following the general **Procedure B**, the title compound was isolated by flash column chromatography on silica gel (PE : DCM = 4 : 1) as a white solid in 55 % (23 mg) yield. **<sup>1</sup>H NMR** (500 MHz, CDCl<sub>3</sub>) δ 6.66 (s, 6H), 3.72 (s, 9H), 2.19 (s, 18H); **<sup>13</sup>C NMR** (126 MHz, CDCl<sub>3</sub>) δ 152.1, 143.8, 131.2, 124.1, 59.8, 16.2; **m.p.:** 253-255 °C; **HRMS** (APCI) calcd for C<sub>27</sub>H<sub>33</sub>NO<sub>3</sub> [M + H<sup>+</sup>], 420.2533; found: 420.2524.

**Tris(3,4-dimethylphenyl)amine (3l)**

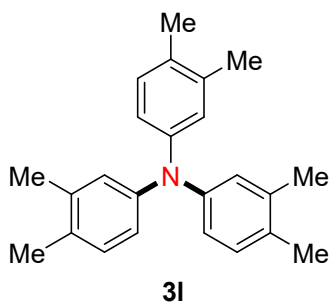

Following the general **Procedure B**, the title compound was isolated by flash column chromatography on silica gel (PE) as a white solid in 63 % (20.8 mg) yield. The spectral data were in accordance with those reported in the literature<sup>13</sup>. **<sup>1</sup>H NMR** (600 MHz, CDCl<sub>3</sub>) δ 7.03 (d, *J* = 7.9 Hz, 3H), 6.92 (s, 3H), 6.84 (dt, *J* = 8.2, 2.2 Hz, 3H), 2.26 (t, *J* = 2.1 Hz, 9H), 2.21 (t, *J* = 2.2 Hz, 9H); **<sup>13</sup>C NMR** (151 MHz, CDCl<sub>3</sub>) δ 146.1, 137.2, 130.3, 130.1, 125.2, 121.5, 19.8, 19.1.

**Tris(3,5-dimethylphenyl)amine (3m)**

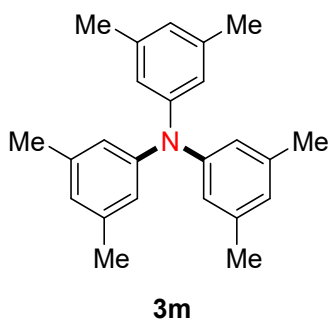

Following the general **Procedure B**, the title compound was isolated by flash column



chromatography on silica gel (PE) as a white solid in 68 % (22.4 mg) yield; The spectral data were in accordance with those reported in the literature<sup>7</sup>. <sup>1</sup>H NMR (600 MHz, CDCl<sub>3</sub>) δ 6.71 (s, 6H), 6.67 (s, 3H), 2.24 (s, 18H); <sup>13</sup>C NMR (151 MHz, CDCl<sub>3</sub>) δ 148.1, 138.6, 124.2, 122.1, 21.3.

#### Tris(benzo[d][1,3]dioxol-5-yl)amine (3n)

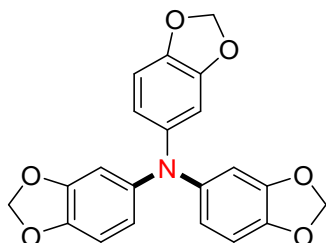

**3n**

Following the general **Procedure B**, the title compound was isolated by flash column chromatography on silica gel (PE : EA = 100 : 1) as a yellow oil in 60 % (22.6 mg) yield. <sup>1</sup>H NMR (600 MHz, CDCl<sub>3</sub>) δ 6.67 (d, *J* = 8.3 Hz, 3H), 6.57 (d, *J* = 2.2 Hz, 3H), 6.47 (dd, *J* = 8.4, 2.2 Hz, 3H), 5.92 (s, 6H); <sup>13</sup>C NMR (151 MHz, CDCl<sub>3</sub>) δ 148.1, 143.0, 116.8, 108.3, 105.8, 101.1; HRMS (APCI) calcd for C<sub>21</sub>H<sub>15</sub>NO<sub>6</sub> [M + H<sup>+</sup>], 378.0972; found: 378.0964.

#### Tris(2,3-dihydrobenzofuran-5-yl)amine (3o)

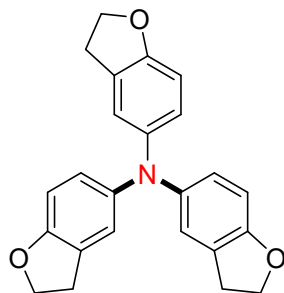

**3o**

Following the general **Procedure B**, the title compound was isolated by flash column chromatography on silica gel (PE) as a white solid in 55 % (20.4 mg) yield. <sup>1</sup>H NMR (500 MHz, CDCl<sub>3</sub>) δ 6.90 (s, 3H), 6.79 (d, *J* = 8.5 Hz, 3H), 6.65 (d, *J* = 8.5 Hz, 3H), 4.54 (t, *J* = 8.6 Hz, 6H), 3.13 (t, *J* = 8.6 Hz, 6H); <sup>13</sup>C NMR (126 MHz, CDCl<sub>3</sub>) δ 155.3, 142.6, 127.7, 123.6, 120.9, 109.3, 71.2, 30.0; **m.p.:** 168-170 °C; HRMS (APCI) calcd for C<sub>24</sub>H<sub>21</sub>NO<sub>3</sub> [M + H<sup>+</sup>], 372.1594; found: 372.1587.

#### Tris(9,9-dimethyl-9H-fluoren-2-yl)amine (3p)

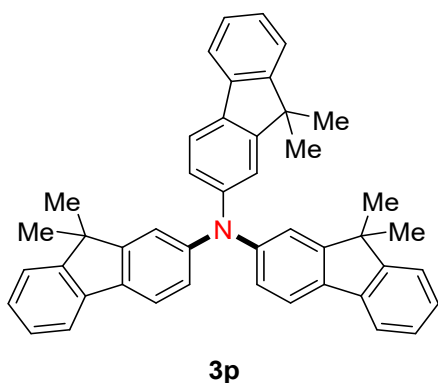

Following the general **Procedure B**, the title compound was isolated by flash column chromatography on silica gel (PE) as a white solid in 70 % (41.5 mg) yield. **<sup>1</sup>H NMR** (500 MHz, CDCl<sub>3</sub>) δ 7.69 (d, *J* = 7.4 Hz, 3H), 7.64 (d, *J* = 8.2 Hz, 3H), 7.43 (d, *J* = 7.4 Hz, 3H), 7.34 (m, *J* = 7.6 Hz, 6H), 7.29 (t, *J* = 7.4 Hz, 3H), 7.18 (d, *J* = 8.1 Hz, 3H), 1.46 (s, 18H); **<sup>13</sup>C NMR** (126 MHz, CDCl<sub>3</sub>) δ 155.0, 153.5, 147.5, 139.0, 133.9, 127.0, 126.4, 123.0, 122.5, 120.6, 119.3, 118.5, 46.8, 27.0; **HRMS** (APCI) calcd for C<sub>45</sub>H<sub>39</sub>N [M + H<sup>+</sup>], 594.3155; found: 594.3144.

#### Tris(4-(9*H*-carbazol-9-yl)phenyl)amine (3q)

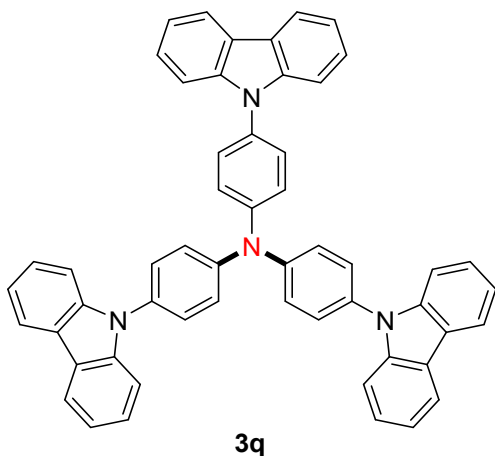

Following the general **Procedure B**, the title compound was isolated by flash column chromatography on silica gel (PE) as a white solid in 71 % (52.6 mg) yield. The spectral data were in accordance with those reported in the literature<sup>7</sup>. **<sup>1</sup>H NMR** (600 MHz, CDCl<sub>3</sub>) δ 8.22 (d, *J* = 7.7 Hz, 6H), 7.63 (d, *J* = 8.7 Hz, 6H), 7.60 – 7.55 (m, 12H), 7.51 (t, *J* = 7.7 Hz, 6H), 7.36 (t, *J* = 7.4 Hz, 6H); **<sup>13</sup>C NMR** (151 MHz, CDCl<sub>3</sub>) δ 146.3, 140.9, 132.8, 128.2, 125.9, 125.3, 123.3, 120.3, 119.9, 109.8.

#### 4-Methoxy-*N*-(*p*-tolyl)aniline (4a)

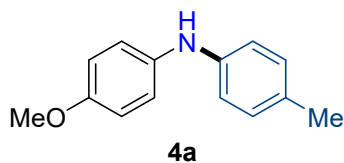

Following the general **Procedure C**, the title compound was isolated by flash column chromatography on silica gel (PE : DCM = 6 : 1) as a yellow oil in 75 % (16 mg) yield. The spectral data were in accordance with those reported in the literature<sup>14</sup>. **<sup>1</sup>H NMR** (600 MHz, CDCl<sub>3</sub>) δ 7.06 – 7.01 (m, 4H), 6.88 – 6.84 (m, 4H), 5.41 (s, 1H), 3.80 (s, 3H), 2.29 (s, 3H); **<sup>13</sup>C NMR** (151 MHz, CDCl<sub>3</sub>) δ 154.8, 142.4, 136.6, 129.8, 129.3, 121.1, 116.5, 114.6, 55.6, 20.5.

#### *N*-(4-methoxyphenyl)-[1,1'-biphenyl]-4-amine (**4b**)

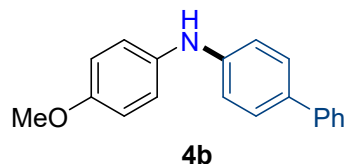

Following the general **Procedure C**, the title compound was isolated by flash column chromatography on silica gel (PE : DCM = 4 : 1) as a white solid in 79 % (21.8 mg) yield. The spectral data were in accordance with those reported in the literature<sup>15</sup>. **<sup>1</sup>H NMR** (600 MHz, CDCl<sub>3</sub>) δ 7.57 (dd, *J* = 8.2, 1.1 Hz, 2H), 7.48 (d, *J* = 8.6 Hz, 2H), 7.42 (t, *J* = 7.8 Hz, 2H), 7.30 (t, *J* = 7.9 Hz, 1H), 7.13 (d, *J* = 8.9 Hz, 2H), 6.99 (d, *J* = 8.6 Hz, 2H), 6.90 (d, *J* = 8.9 Hz, 2H), 5.59 (s, 1H), 3.83 (s, 3H); **<sup>13</sup>C NMR** (151 MHz, CDCl<sub>3</sub>) δ 155.4, 144.6, 141.0, 135.4, 132.3, 128.7, 127.9, 126.4, 126.3, 122.4, 115.7, 114.7, 55.6.

#### 4-Fluoro-*N*-(4-methoxyphenyl)aniline (**4c**)

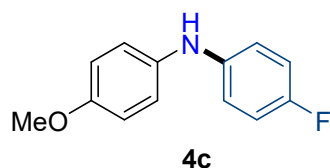

Following the general **Procedure C**, the title compound was isolated by flash column chromatography on silica gel (PE : DCM = 8 : 1) as a yellow oil in 46 % (10 mg) yield. The spectral data were in accordance with those reported in the literature<sup>16</sup>. **<sup>1</sup>H NMR** (600 MHz, CDCl<sub>3</sub>) δ 7.00 (d, *J* = 8.9 Hz, 2H), 6.93 (t, *J* = 8.7 Hz, 2H), 6.90 – 6.83 (m, 4H), 5.39 (s, 1H), 3.80 (s, 3H); **<sup>13</sup>C NMR** (151 MHz, CDCl<sub>3</sub>) δ 157.1 (d, *J*<sub>C-F</sub> = 238.2 Hz), 155.0, 141.1, 136.5, 121.2, 117.8 (d, *J*<sub>C-F</sub> = 7.6 Hz), 115.8 (d, *J*<sub>C-F</sub> = 22.2 Hz), 114.7, 55.6; **<sup>19</sup>F NMR** (565 MHz, CDCl<sub>3</sub>) δ -124.37.

#### 4-Methoxy-*N*-(4-(trifluoromethyl)phenyl)aniline (**4d**)

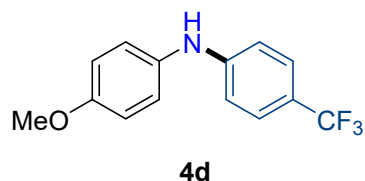

Following the general **Procedure C**, the title compound was isolated by flash column chromatography on silica gel (PE : DCM = 8 : 1) as a yellow oil in 85 % (22.7 mg) yield. The spectral data were in accordance with those reported in the literature<sup>16</sup>. **<sup>1</sup>H NMR** (600 MHz, CDCl<sub>3</sub>) δ 7.42 (d, *J* = 8.6 Hz, 2H), 7.12 (d, *J* = 8.9 Hz, 2H), 6.91 (d, *J* = 8.9 Hz, 2H), 6.86 (d, *J* =

8.5 Hz, 2H), 5.74 (s, 1H), 3.83 (s, 3H);  $^{13}\text{C}$  NMR (151 MHz,  $\text{CDCl}_3$ )  $\delta$  156.5, 148.6, 133.7,  $\delta$  126.6 (q,  $J_{\text{C-F}} = 3.8$  Hz),  $\delta$  124.7 (q,  $J_{\text{C-F}} = 270.6$  Hz), 124.2, 120.4 (q,  $J_{\text{C-F}} = 32.6$  Hz), 114.8, 113.7, 55.5;  $^{19}\text{F}$  NMR (565 MHz,  $\text{CDCl}_3$ )  $\delta$  -61.22.

#### 4-Methoxy-*N*-phenylaniline (4e)

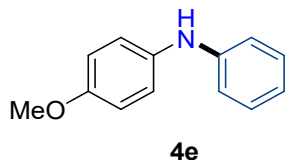

Following the general **Procedure C**, the title compound was isolated by flash column chromatography on silica gel (PE : DCM = 6 : 1) as a yellow solid in 77 % (15.4 mg) yield. The spectral data were in accordance with those reported in the literature<sup>17</sup>.  $^1\text{H}$  NMR (600 MHz,  $\text{CDCl}_3$ )  $\delta$  7.23 (t,  $J = 7.9$  Hz, 2H), 7.09 (d,  $J = 8.8$  Hz, 2H), 6.92 (d,  $J = 7.8$  Hz, 2H), 6.88 (d,  $J = 8.8$  Hz, 2H), 6.85 (t,  $J = 7.3$  Hz, 1H), 3.81 (s, 3H);  $^{13}\text{C}$  NMR (151 MHz,  $\text{CDCl}_3$ )  $\delta$  155.2, 145.1, 135.7, 129.3, 122.2, 119.5, 115.6, 114.6, 55.5.

#### *N*-(4-methoxyphenyl)-2-methylaniline (4f)

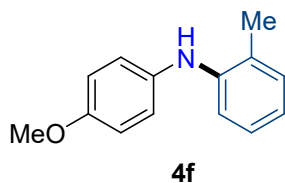

Following the general **Procedure C**, the title compound was isolated by flash column chromatography on silica gel (PE : DCM = 4 : 1) as a yellow oil in 83 % (17.7 mg) yield. The spectral data were in accordance with those reported in the literature<sup>16</sup>.  $^1\text{H}$  NMR (600 MHz,  $\text{CDCl}_3$ )  $\delta$  7.19 – 7.15 (m, 1H), 7.10 (t,  $J = 7.6$  Hz, 1H), 7.05 – 7.01 (m, 3H), 6.90 – 6.87 (m, 2H), 6.84 (t,  $J = 7.3$  Hz, 1H), 5.24 (s, 1H), 3.82 (s, 3H), 2.27 (s, 3H);  $^{13}\text{C}$  NMR (151 MHz,  $\text{CDCl}_3$ )  $\delta$  155.1, 143.3, 136.3, 130.7, 126.7, 125.2, 122.1, 119.9, 115.1, 114.6, 55.6, 17.7.

#### Methyl 3-((4-methoxyphenyl)amino)benzoate (4g)

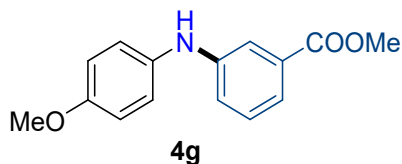

Following the general **Procedure C**, the title compound was isolated by flash column chromatography on silica gel (PE : DCM = 4 : 1) as a yellow solid in 71 % (18.2 mg) yield. The spectral data were in accordance with those reported in the literature<sup>16</sup>.  $^1\text{H}$  NMR (600 MHz,  $\text{CDCl}_3$ )  $\delta$  7.56 – 7.54 (m, 1H), 7.48 (d,  $J = 7.7$  Hz, 1H), 7.28 – 7.23 (m, 1H), 7.10 – 7.05 (m, 3H), 6.90 – 6.87 (m, 2H), 5.63 (s, 1H), 3.88 (s, 3H), 3.81 (s, 3H);  $^{13}\text{C}$  NMR (151 MHz,  $\text{CDCl}_3$ )  $\delta$  167.2, 155.7, 145.5, 134.9, 131.2, 129.2, 122.8, 120.4, 119.4, 116.0, 114.8, 55.5, 52.1.

#### *N*-(4-methoxyphenyl)-3-methylaniline (4h)

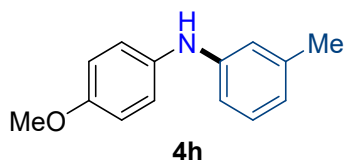

Following the general **Procedure C**, the title compound was isolated by flash column chromatography on silica gel (PE : DCM = 6 : 1) as a yellow oil in 86 % (18.3 mg) yield. The spectral data were in accordance with those reported in the literature<sup>17</sup>. **<sup>1</sup>H NMR** (600 MHz, CDCl<sub>3</sub>) δ 7.11 (t, *J* = 7.6 Hz, 1H), 7.08 (d, *J* = 8.9 Hz, 2H), 6.87 (d, *J* = 8.9 Hz, 2H), 6.73 (d, *J* = 8.1 Hz, 2H), 6.67 (d, *J* = 7.4 Hz, 1H), 5.46 (s, 1H), 3.81 (s, 3H), 2.29 (s, 3H); **<sup>13</sup>C NMR** (151 MHz, CDCl<sub>3</sub>) δ 155.2, 145.1, 139.1, 135.8, 129.1, 122.2, 120.4, 116.3, 114.6, 112.8, 55.6, 21.5.

#### 2-Methoxy-*N*-(4-methoxyphenyl)pyridin-3-amine (4i)

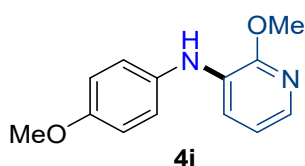

Following the general **Procedure C**, the title compound was isolated by flash column chromatography on silica gel (PE : DCM = 3 : 1) as an orange oil in 84 % (19.3 mg) yield. **<sup>1</sup>H NMR** (600 MHz, CDCl<sub>3</sub>) δ 7.58 (dd, *J* = 5.0, 1.6 Hz, 1H), 7.16 (dd, *J* = 7.7, 1.6 Hz, 1H), 7.11 (d, *J* = 8.9 Hz, 2H), 6.89 (d, *J* = 8.9 Hz, 2H), 6.73 (dd, *J* = 7.7, 5.0 Hz, 1H), 5.92 (s, 1H), 4.03 (s, 3H), 3.80 (s, 3H); **<sup>13</sup>C NMR** (151 MHz, CDCl<sub>3</sub>) δ 155.8, 152.7, 134.6, 134.1, 130.2, 123.2, 117.0, 116.9, 114.7, 55.5, 53.4; **HRMS** (APCI) calcd for C<sub>13</sub>H<sub>14</sub>N<sub>2</sub>O<sub>2</sub> [M + H<sup>+</sup>], 231.1128; found: 231.1125.

#### *N*-(4-methoxyphenyl)-1-methyl-1*H*-indol-5-amine (4j)

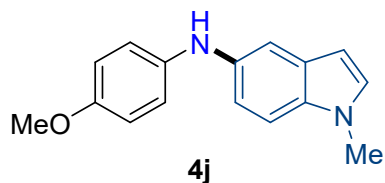

Following the general **Procedure C**, the title compound was isolated by flash column chromatography on silica gel (PE : DCM = 6 : 1) as a brown solid in 50 % (12.6 mg) yield. The spectral data were in accordance with those reported in the literature<sup>18</sup>. **<sup>1</sup>H NMR** (600 MHz, CDCl<sub>3</sub>) δ 7.29 (d, *J* = 2.0 Hz, 1H), 7.26 – 7.23 (m, 1H), 7.03 (d, *J* = 3.0 Hz, 1H), 7.00 – 6.95 (m, 3H), 6.86 – 6.81 (m, 2H), 6.38 (d, *J* = 3.0 Hz, 1H), 5.39 (s, 1H), 3.79 (s, 3H), 3.78 (s, 3H); **<sup>13</sup>C NMR** (151 MHz, CDCl<sub>3</sub>) δ 153.7, 139.4, 136.8, 133.1, 129.3, 129.1, 118.6, 116.2, 114.7, 110.6, 109.8, 100.2, 55.7, 32.9.

#### Ethyl 4-(*p*-tolylamino)benzoate (4k)

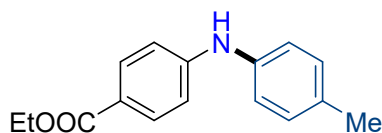

**4k**

Following the general **Procedure C**, the title compound was isolated by flash column chromatography on silica gel (PE : DCM = 8 : 1) as a yellow solid in 63 % (16.1 mg) yield. The spectral data were in accordance with those reported in the literature<sup>14</sup>. **<sup>1</sup>H NMR** (600 MHz, CDCl<sub>3</sub>) δ 7.90 (d, *J* = 8.8 Hz, 2H), 7.17 – 7.13 (m, 2H), 7.08 (d, *J* = 8.3 Hz, 2H), 6.92 (d, *J* = 8.8 Hz, 2H), 5.98 (s, 1H), 4.33 (q, *J* = 7.1 Hz, 2H), 2.34 (s, 3H), 1.37 (t, *J* = 7.1 Hz, 3H); **<sup>13</sup>C NMR** (151 MHz, CDCl<sub>3</sub>) δ 166.6, 148.6, 138.1, 133.0, 131.4, 130.0, 121.2, 120.9, 114.0, 60.4, 20.8, 14.4.

#### 4-Fluoro-*N*-(*p*-tolyl)aniline (**4l**)

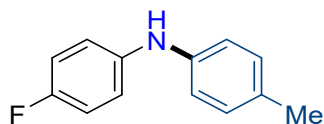

**4l**

Following the general **Procedure C**, the title compound was isolated by flash column chromatography on silica gel (PE) as a yellow oil in 65 % (13.1 mg) yield. The spectral data were in accordance with those reported in the literature<sup>19</sup>. **<sup>1</sup>H NMR** (600 MHz, CDCl<sub>3</sub>) δ 7.09 (d, *J* = 8.0 Hz, 2H), 7.01 – 6.95 (m, 4H), 6.95 – 6.91 (m, 2H), 5.50 (s, 1H), 2.32 (s, 3H); **<sup>13</sup>C NMR** (151 MHz, CDCl<sub>3</sub>) δ 157.6 (d, *J*<sub>C-F</sub> = 239.1 Hz), δ 141.1, 139.8, 130.5, 129.9, 119.3 (d, *J*<sub>C-F</sub> = 7.7 Hz), 117.8, 115.8 (d, *J*<sub>C-F</sub> = 22.5 Hz) 20.6; **<sup>19</sup>F NMR** (565 MHz, CDCl<sub>3</sub>) δ -123.08.

#### 4-Methyl-*N*-(4-(trifluoromethyl)phenyl)aniline (**4m**)

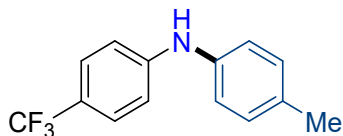

**4m**

Following the general **Procedure C**, the title compound was isolated by flash column chromatography on silica gel (PE) as a white solid in 37 % (9.3 mg) yield. The spectral data were in accordance with those reported in the literature<sup>14</sup>. **<sup>1</sup>H NMR** (600 MHz, CDCl<sub>3</sub>) δ 7.44 (d, *J* = 8.5 Hz, 2H), 7.15 (d, *J* = 8.1 Hz, 2H), 7.06 (d, *J* = 8.3 Hz, 2H), 6.97 (d, *J* = 8.5 Hz, 2H), 5.83 (s, 1H), 2.34 (s, 3H); **<sup>13</sup>C NMR** (151 MHz, CDCl<sub>3</sub>) δ 147.5, 138.3, 133.0, 130.1, 126.6 (q, *J*<sub>C-F</sub> = 3.8 Hz), 124.7 (q, *J*<sub>C-F</sub> = 270.6 Hz), 121.04, 121.02 (q, *J*<sub>C-F</sub> = 32.7 Hz), 114.6, 20.8; **<sup>19</sup>F NMR** (565 MHz, CDCl<sub>3</sub>) δ -61.36.

#### Methyl 3-(*p*-tolylamino)benzoate (**4n**)

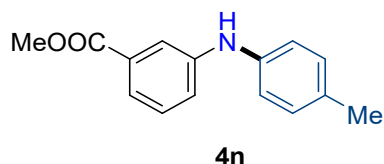

Following the general **Procedure C**, the title compound was isolated by flash column chromatography on silica gel (PE : DCM = 6 : 1) as a white solid in 54 % (13.0 mg) yield. The spectral data were in accordance with those reported in the literature<sup>14</sup>. **<sup>1</sup>H NMR** (600 MHz, CDCl<sub>3</sub>) δ 7.67 – 7.64 (m, 1H), 7.53 (d, *J* = 7.7 Hz, 1H), 7.28 (t, *J* = 7.9 Hz, 1H), 7.18 (ddd, *J* = 8.1, 2.6, 1.0 Hz, 1H), 7.12 (d, *J* = 8.3 Hz, 2H), 7.02 (d, *J* = 8.3 Hz, 2H), 5.73 (s, 1H), 3.89 (s, 3H), 2.32 (s, 3H); **<sup>13</sup>C NMR** (151 MHz, CDCl<sub>3</sub>) δ 167.2, 144.3, 139.5, 131.7, 131.2, 130.0, 129.3, 121.1, 120.5, 119.5, 117.2, 52.1, 20.7.

#### ***N*-(*p*-tolyl)-3-(trifluoromethoxy)aniline (4o)**

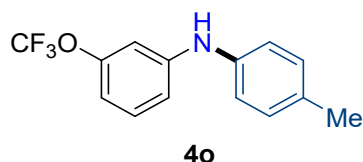

Following the general **Procedure C**, the title compound was isolated by flash column chromatography on silica gel (PE) as a yellow oil in 62 % (16.6 mg) yield. **<sup>1</sup>H NMR** (600 MHz, CDCl<sub>3</sub>) δ 7.21 (t, *J* = 8.2 Hz, 1H), 7.14 (d, *J* = 8.0 Hz, 2H), 7.04 (d, *J* = 8.4 Hz, 2H), 6.87 (dd, *J* = 7.8, 2.5 Hz, 1H), 6.83 (s, 1H), 6.70 (d, *J* = 8.1 Hz, 1H), 5.71 (s, 1H), 2.34 (s, 3H); **<sup>13</sup>C NMR** (151 MHz, CDCl<sub>3</sub>) δ 150.3, 145.9, 138.9, 132.3, 130.3, 130.0, δ 120.5 (q, *J*<sub>C-F</sub> = 256.8 Hz), 120.1, 114.1, 111.6, 108.2, 20.7; **<sup>19</sup>F NMR** (565 MHz, CDCl<sub>3</sub>) δ -57.62; **HRMS** (APCI) calcd for C<sub>14</sub>H<sub>12</sub>F<sub>3</sub>NO [M + H<sup>+</sup>], 268.0944; found: 268.0940.

#### **3-Methyl-*N*-(*p*-tolyl)aniline (4p)**

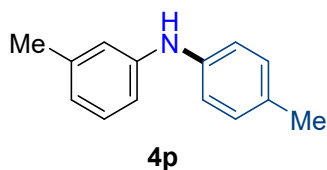

Following the general **Procedure C**, the title compound was isolated by flash column chromatography on silica gel (PE) as a yellow oil in 86 % (17.0 mg) yield. The spectral data were in accordance with those reported in the literature<sup>19</sup>. **<sup>1</sup>H NMR** (600 MHz, CDCl<sub>3</sub>) δ 7.15 (t, *J* = 7.7 Hz, 1H), 7.11 (d, *J* = 8.0 Hz, 2H), 7.01 (d, *J* = 8.4 Hz, 2H), 6.84 (d, *J* = 7.8 Hz, 2H), 6.73 (d, *J* = 7.5 Hz, 1H), 5.58 (s, 1H), 2.33 (s, 3H), 2.32 (s, 3H); **<sup>13</sup>C NMR** (151 MHz, CDCl<sub>3</sub>) δ 143.9, 140.4, 139.1, 130.8, 129.8, 129.1, 121.2, 118.9, 117.5, 114.0, 21.5, 20.7.

#### **3,5-Dimethyl-*N*-(*p*-tolyl)aniline (4q)**

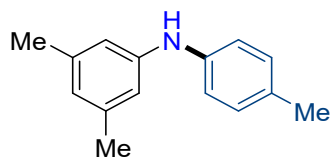

**4q**

Following the general **Procedure C**, the title compound was isolated by flash column chromatography on silica gel (PE) as a yellow oil in 86 % (18.1 mg) yield. The spectral data were in accordance with those reported in the literature<sup>14</sup>. **<sup>1</sup>H NMR** (600 MHz, CDCl<sub>3</sub>) δ 7.09 (d, *J* = 8.1 Hz, 2H), 6.99 (d, *J* = 8.3 Hz, 2H), 6.65 (s, 2H), 6.55 (s, 1H), 5.53 (s, 1H), 2.31 (s, 3H), 2.26 (s, 6H); **<sup>13</sup>C NMR** (151 MHz, CDCl<sub>3</sub>) δ 143.9, 140.4, 139.0, 130.7, 129.8, 122.2, 119.0, 114.6, 21.4, 20.7.

***N*-(*p*-tolyl)naphthalen-1-amine (4r)**

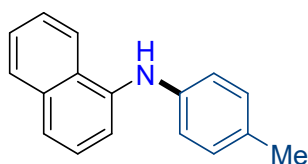

**4r**

Following the general **Procedure C**, the title compound was isolated by flash column chromatography on silica gel (PE) as a yellow oil in 81 % (19.0 mg) yield. The spectral data were in accordance with those reported in the literature<sup>14</sup>. **<sup>1</sup>H NMR** (600 MHz, CDCl<sub>3</sub>) δ 8.03 (d, *J* = 8.1 Hz, 1H), 7.90 – 7.85 (m, 1H), 7.55 – 7.46 (m, 3H), 7.38 (t, *J* = 7.8 Hz, 1H), 7.30 (dd, *J* = 7.5, 1.1 Hz, 1H), 7.15 – 7.08 (m, 2H), 6.97 (d, *J* = 8.4 Hz, 2H), 5.91 (s, 1H), 2.34 (s, 3H); **<sup>13</sup>C NMR** (151 MHz, CDCl<sub>3</sub>) δ 141.8, 139.6, 134.6, 130.4, 129.9, 128.5, 127.0, 126.1, 126.0, 125.5, 122.0, 121.5, 118.5, 114.1, 20.6.

**2-Methoxy-*N*-(*p*-tolyl)pyridin-3-amine (4s)**

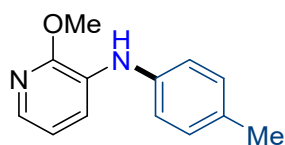

**4s**

Following the general **Procedure C**, the title compound was isolated by flash column chromatography on silica gel (PE : DCM = 4 : 1) as a yellow oil in 89 % (19.1 mg) yield. The spectral data were in accordance with those reported in the literature<sup>14</sup>. **<sup>1</sup>H NMR** (600 MHz, CDCl<sub>3</sub>) δ 7.61 (dd, *J* = 5.0, 1.6 Hz, 1H), 7.35 (dd, *J* = 7.7, 1.6 Hz, 1H), 7.13 (d, *J* = 8.2 Hz, 2H), 7.06 (d, *J* = 8.4 Hz, 2H), 6.76 (dd, *J* = 7.7, 5.0 Hz, 1H), 6.03 (s, 1H), 4.04 (s, 3H), 2.32 (s, 3H); **<sup>13</sup>C NMR** (151 MHz, CDCl<sub>3</sub>) δ 153.0, 138.6, 135.1, 131.9, 129.9, 129.1, 120.1, 117.9, 117.0, 53.4, 20.7.

**1-Methyl-*N*-(*p*-tolyl)-1*H*-indol-5-amine (4t)**



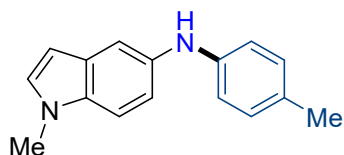

**4t**

Following the general **Procedure C**, the title compound was isolated by flash column chromatography on silica gel (PE : DCM = 8 : 1) as a white solid in 69 % (16.3 mg) yield. The spectral data were in accordance with those reported in the literature<sup>14</sup>. **<sup>1</sup>H NMR** (600 MHz, CDCl<sub>3</sub>) δ 7.38 (d, *J* = 2.1 Hz, 1H), 7.28 – 7.25 (m, 1H), 7.04 (dt, *J* = 5.7, 2.6 Hz, 4H), 6.89 (d, *J* = 8.4 Hz, 2H), 6.40 (d, *J* = 3.5 Hz, 1H), 5.52 (s, 1H), 3.79 (s, 3H), 2.29 (s, 3H); **<sup>13</sup>C NMR** (151 MHz, CDCl<sub>3</sub>) δ 143.7, 135.5, 133.5, 129.7, 129.4, 129.0, 128.5, 117.3, 115.9, 112.4, 109.7, 100.4, 32.9, 20.5.

**2-Methyl-*N*-(*p*-tolyl)aniline (4u)**

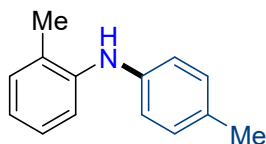

**4u**

Following the general **Procedure C**, the title compound was isolated by flash column chromatography on silica gel (PE) as a yellow oil in 79 % (15.7 mg) yield. The spectral data were in accordance with those reported in the literature<sup>19</sup>. **<sup>1</sup>H NMR** (600 MHz, CDCl<sub>3</sub>) δ 7.19 (t, *J* = 7.1 Hz, 2H), 7.13 (td, *J* = 7.8, 1.5 Hz, 1H), 7.10 (d, *J* = 8.1 Hz, 2H), 6.93 (d, *J* = 8.3 Hz, 2H), 6.90 (td, *J* = 7.4, 1.3 Hz, 1H), 5.32 (s, 1H), 2.33 (s, 3H), 2.27 (s, 3H); **<sup>13</sup>C NMR** (151 MHz, CDCl<sub>3</sub>) δ 142.0, 141.0, 130.8, 130.4, 129.8, 127.0, 126.7, 121.0, 118.6, 117.2, 20.6, 17.8.

**4-Methoxy-*N,N*-diphenylaniline (5a)**

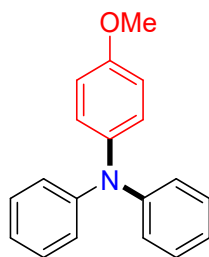

**5a**

Following the general **Procedure D**, the title compound was isolated by flash column chromatography on silica gel (PE) as a white solid in 81 % (22.3 mg) yield. The spectral data were in accordance with those reported in the literature<sup>20</sup>. **<sup>1</sup>H NMR** (600 MHz, CDCl<sub>3</sub>) δ 7.22 (t, *J* = 7.9 Hz, 4H), 7.09 (d, *J* = 8.9 Hz, 2H), 7.05 (d, *J* = 8.0 Hz, 4H), 6.96 (t, *J* = 7.3 Hz, 2H), 6.86 (d, *J* = 8.9 Hz, 2H), 3.81 (s, 3H); **<sup>13</sup>C NMR** (151 MHz, CDCl<sub>3</sub>) δ 156.1, 148.1, 140.7, 129.0, 127.3, 122.8, 121.8, 114.7, 55.4.

***N,N*-diphenyl-[1,1'-biphenyl]-4-amine (5b)**

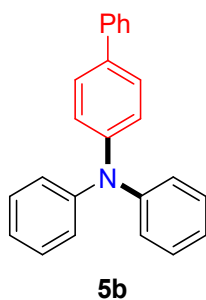

Following the general **Procedure D**, the title compound was isolated by flash column chromatography on silica gel (PE) as a pink solid in 79 % (25.4 mg) yield. The spectral data were in accordance with those reported in the literature<sup>20</sup>. **<sup>1</sup>H NMR** (600 MHz, CDCl<sub>3</sub>) δ 7.60 (d, *J* = 7.8 Hz, 2H), 7.50 (dd, *J* = 8.7, 2.0 Hz, 2H), 7.44 (t, *J* = 7.6 Hz, 2H), 7.33 (t, *J* = 7.4 Hz, 1H), 7.30 (t, *J* = 7.7 Hz, 4H), 7.17 (d, *J* = 8.0 Hz, 6H), 7.06 (t, *J* = 7.3 Hz, 2H); **<sup>13</sup>C NMR** (151 MHz, CDCl<sub>3</sub>) δ 147.7, 147.1, 140.6, 135.1, 129.2, 128.7, 127.7, 126.8, 126.6, 124.4, 123.9, 122.9.

#### 4-Phenoxy-*N,N*-diphenylamine (5c)

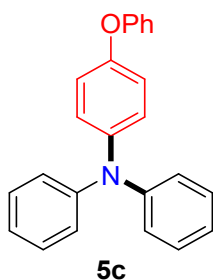

Following the general **Procedure D**, the title compound was isolated by flash column chromatography on silica gel (PE) as a light yellow oil in 67 % (22.6 mg) yield. The spectral data were in accordance with those reported in the literature. **<sup>1</sup>H NMR** (600 MHz, CDCl<sub>3</sub>) δ 7.35 (dd, *J* = 8.5, 7.5 Hz, 2H), 7.26 (dd, *J* = 9.4, 6.4 Hz, 4H), 7.10 (d, *J* = 8.6 Hz, 7H), 7.05 (d, *J* = 7.7 Hz, 2H), 7.00 (t, *J* = 7.3 Hz, 2H), 6.94 (d, *J* = 8.9 Hz, 2H); **<sup>13</sup>C NMR** (151 MHz, CDCl<sub>3</sub>) δ 157.5, 152.7, 147.9, 143.3, 129.7, 129.2, 126.3, 123.5, 123.0, 122.4, 119.9, 118.5. **HRMS** (APCI) calcd for C<sub>24</sub>H<sub>19</sub>NO [M + H<sup>+</sup>], 338.1539; found: 338.1535.

#### *N,N*-diphenyl-4-(trifluoromethyl)aniline (5d)

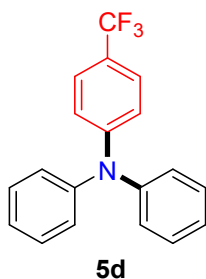

Following the general **Procedure D**, the title compound was isolated by flash column chromatography on silica gel (PE) as a colorless oil in 75 % (23.5 mg) yield. The spectral data were in accordance with those reported in the literature<sup>21</sup>. **<sup>1</sup>H NMR** (600 MHz, CDCl<sub>3</sub>) δ 7.42 (d, *J* = 8.6 Hz, 2H), 7.31 (t, *J* = 7.9 Hz, 4H), 7.12 (dd, *J* = 16.1, 7.7 Hz, 6H), 7.06 (d, *J* = 8.6 Hz, 2H);

$^{13}\text{C}$  NMR (151 MHz,  $\text{CDCl}_3$ )  $\delta$  150.9, 146.8, 129.6, 126.2 (q,  $J_{\text{C-F}} = 3.7$  Hz), 125.5, 124.5 (q,  $J_{\text{C-F}} = 271.1$  Hz), 124.2, 122.8 (q,  $J_{\text{C-F}} = 32.5$  Hz), 121.0;  $^{19}\text{F}$  NMR (565 MHz,  $\text{CDCl}_3$ )  $\delta$  -61.67.

#### 4-Fluoro-*N,N*-diphenylaniline (5e)

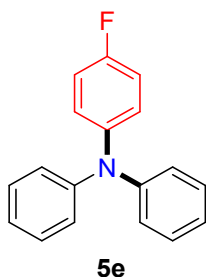

Following the general **Procedure D**, the title compound was isolated by flash column chromatography on silica gel (PE) as a white solid in 57 % (15.1 mg) yield. The spectral data were in accordance with those reported in the literature<sup>20</sup>.  $^1\text{H}$  NMR (600 MHz,  $\text{CDCl}_3$ )  $\delta$  7.24 (tdd,  $J = 9.5, 4.0, 2.0$  Hz, 4H), 7.11 – 7.02 (m, 6H), 7.02 – 6.93 (m, 4H);  $^{13}\text{C}$  NMR (151 MHz,  $\text{CDCl}_3$ )  $\delta$  158.9 (d,  $J_{\text{C-F}} = 242.8$  Hz), 147.9, 143.9, 129.2, 126.4 (d,  $J_{\text{C-F}} = 7.8$  Hz), 123.5, 122.5, 116.0 (d,  $J_{\text{C-F}} = 22.4$  Hz);  $^{19}\text{F}$  NMR (565 MHz,  $\text{CDCl}_3$ )  $\delta$  -119.71.

#### *N,N*-diphenyl-3-(trifluoromethoxy)aniline (5f)

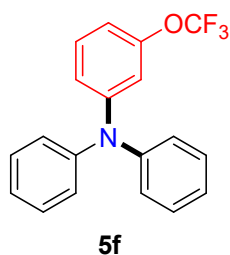

Following the general **Procedure D**, the title compound was isolated by flash column chromatography on silica gel (PE) as a yellow oil in 78 % (25.7 mg) yield.  $^1\text{H}$  NMR (600 MHz,  $\text{CDCl}_3$ )  $\delta$  7.31 – 7.27 (m, 4H), 7.20 (t,  $J = 8.2$  Hz, 1H), 7.12 (d,  $J = 7.6$  Hz, 4H), 7.09 (t,  $J = 7.4$  Hz, 2H), 6.95 (dd,  $J = 8.0, 1.8$  Hz, 1H), 6.89 (s, 1H), 6.81 (d,  $J = 8.2$  Hz, 1H);  $^{13}\text{C}$  NMR (151 MHz,  $\text{CDCl}_3$ )  $\delta$  150.0, 149.4, 147.0, 129.9, 129.5, 125.0, 123.8, 120.5, 120.4 (q,  $J_{\text{C-F}} = 256.9$  Hz), 115.0, 113.7;  $^{19}\text{F}$  NMR (565 MHz,  $\text{CDCl}_3$ )  $\delta$  -57.76; HRMS (APCI) calcd for  $\text{C}_{19}\text{H}_{14}\text{F}_3\text{NO}$  [ $\text{M} + \text{H}^+$ ], 330.1100; found: 330.1097.

#### 3,5-Dimethyl-*N,N*-diphenylaniline (5g)

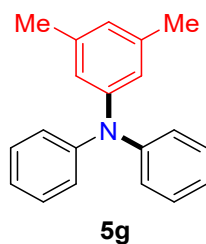

Following the general **Procedure D**, the title compound was isolated by flash column chromatography on silica gel (PE) as a colorless oil in 85 % (23.2 mg) yield. The spectral data were in accordance with those reported in the literature<sup>20</sup>.  $^1\text{H}$  NMR (600 MHz,  $\text{CDCl}_3$ )  $\delta$  7.24 (t,

$J = 7.8$  Hz, 4H), 7.08 (d,  $J = 7.9$  Hz, 4H), 7.00 (t,  $J = 7.3$  Hz, 2H), 6.73 (s, 2H), 6.69 (s, 1H), 2.23 (s, 6H);  $^{13}\text{C}$  NMR (151 MHz,  $\text{CDCl}_3$ )  $\delta$  148.0, 147.7, 138.8, 129.1, 124.8, 124.0, 122.34, 122.30, 21.3.

#### *N,N*-diphenylnaphthalen-1-amine (5h)

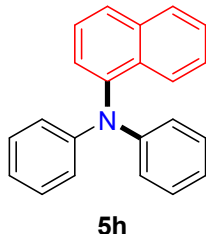

Following the general **Procedure D**, the title compound was isolated by flash column chromatography on silica gel (PE) as a pink solid in 57 % (16.8 mg) yield. The spectral data were in accordance with those reported in the literature<sup>20</sup>.  $^1\text{H}$  NMR (600 MHz,  $\text{CDCl}_3$ )  $\delta$  7.96 (d,  $J = 8.5$  Hz, 1H), 7.89 (d,  $J = 8.2$  Hz, 1H), 7.77 (d,  $J = 8.2$  Hz, 1H), 7.49 – 7.44 (m, 2H), 7.38 – 7.32 (m, 2H), 7.20 (dd,  $J = 8.5, 7.4$  Hz, 4H), 7.04 (d,  $J = 7.7$  Hz, 4H), 6.94 (t,  $J = 7.3$  Hz, 2H);  $^{13}\text{C}$  NMR (151 MHz,  $\text{CDCl}_3$ )  $\delta$  148.4, 143.6, 135.3, 131.3, 129.0, 128.3, 127.2, 126.4, 126.34, 126.32, 126.1, 124.3, 121.8, 121.6.

#### 1-Methyl-*N,N*-diphenyl-1*H*-indol-5-amine (5i)

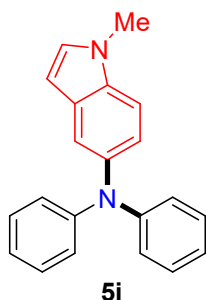

Following the general **Procedure D**, the title compound was isolated by flash column chromatography on silica gel (PE) as a yellow oil in 60 % (17.9 mg) yield. The spectral data were in accordance with those reported in the literature<sup>20</sup>.  $^1\text{H}$  NMR (600 MHz,  $\text{CDCl}_3$ )  $\delta$  7.43 (d,  $J = 1.9$  Hz, 1H), 7.29 (d,  $J = 8.7$  Hz, 1H), 7.21 (dd,  $J = 8.6, 7.4$  Hz, 4H), 7.10 – 7.07 (m, 5H), 7.05 (d,  $J = 3.1$  Hz, 1H), 6.93 (t,  $J = 7.3$  Hz, 2H), 6.40 (d,  $J = 3.6$  Hz, 1H), 3.80 (s, 3H);  $^{13}\text{C}$  NMR (151 MHz,  $\text{CDCl}_3$ )  $\delta$  148.7, 140.0, 134.2, 129.5, 129.3, 128.9, 122.5, 121.9, 121.2, 119.2, 110.1, 100.9, 33.0.

#### Methyl 3-(diphenylamino)benzoate (5j)

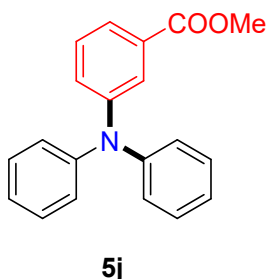

Following the general **Procedure D**, the title compound was isolated by flash column chromatography on silica gel (PE) as a yellow oil in 77 % (23.4 mg) yield. The spectral data were in accordance with those reported in the literature<sup>20</sup>. <sup>1</sup>H NMR (600 MHz, CDCl<sub>3</sub>) δ 7.78 – 7.74 (m, 1H), 7.66 (dt, *J* = 7.5, 1.4 Hz, 1H), 7.31 – 7.24 (m, 6H), 7.11 – 7.06 (m, 4H), 7.05 (t, *J* = 7.4 Hz, 2H), 3.85 (s, 3H); <sup>13</sup>C NMR (151 MHz, CDCl<sub>3</sub>) δ 166.9, 148.1, 147.4, 131.3, 129.4, 129.2, 128.0, 124.41, 124.37, 123.4, 123.2, 52.1.

#### 4-(9*H*-carbazol-9-yl)-*N,N*-diphenylaniline (**5k**)

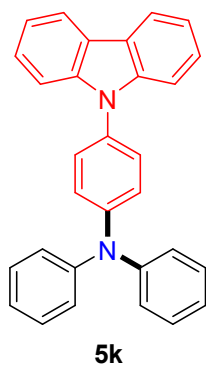

Following the general **Procedure D**, the title compound was isolated by flash column chromatography on silica gel (PE) as a white solid in 84 % (34.5 mg) yield. The spectral data were in accordance with those reported in the literature<sup>20</sup>. <sup>1</sup>H NMR (600 MHz, CDCl<sub>3</sub>) δ 8.17 (d, *J* = 7.7 Hz, 2H), 7.49 – 7.41 (m, 6H), 7.38 – 7.33 (m, 4H), 7.33 – 7.28 (m, 4H), 7.27 – 7.23 (m, 4H), 7.12 (t, *J* = 7.3 Hz, 2H); <sup>13</sup>C NMR (151 MHz, CDCl<sub>3</sub>) δ 147.5, 147.1, 141.1, 131.4, 129.4, 127.8, 125.8, 124.7, 124.0, 123.4, 123.2, 120.2, 119.7, 109.8.

#### *N*-([1,1'-biphenyl]-4-yl)-*N*-(4-methoxyphenyl)-[1,1'-biphenyl]-4-amine (**5l**)

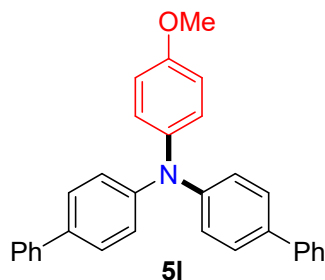

Following the general **Procedure D**, the title compound was isolated by flash column chromatography on silica gel (PE : EA = 100 : 1) as a white solid in 70 % (29.9 mg) yield. <sup>1</sup>H NMR (600 MHz, CDCl<sub>3</sub>) δ 7.60 (dd, *J* = 8.3, 1.1 Hz, 4H), 7.53 – 7.48 (m, 4H), 7.46 – 7.41 (m, 4H), 7.35 – 7.29 (m, 2H), 7.22 – 7.12 (m, 6H), 6.91 (d, *J* = 9.0 Hz, 2H), 3.84 (s, 3H); <sup>13</sup>C NMR (151 MHz, CDCl<sub>3</sub>) δ 156.4, 147.3, 140.7, 140.4, 134.6, 128.7, 127.7, 127.5, 126.7, 126.6, 123.0, 114.9, 55.5; HRMS (APCI) calcd for C<sub>31</sub>H<sub>25</sub>NO [M + H<sup>+</sup>], 428.2009; found: 428.2006.

#### 4-Methoxy-*N,N*-bis(4-phenoxyphenyl)aniline (**5m**)

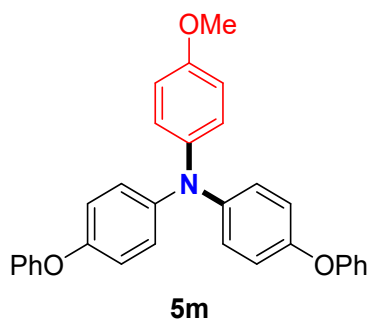

Following the general **Procedure D**, the title compound was isolated by flash column chromatography on silica gel (PE : EA = 50 : 1) as a yellow oil in 60 % (27.6 mg) yield. **<sup>1</sup>H NMR** (600 MHz, CDCl<sub>3</sub>) δ 7.33 (t, *J* = 8.0 Hz, 4H), 7.11 – 7.07 (m, 4H), 7.06 – 7.01 (m, 8H), 6.92 (d, *J* = 8.9 Hz, 4H), 6.86 (d, *J* = 9.0 Hz, 2H), 3.81 (s, 3H); **<sup>13</sup>C NMR** (151 MHz, CDCl<sub>3</sub>) δ 157.8, 155.8, 151.6, 144.0, 141.0, 129.6, 126.3, 124.2, 122.8, 120.0, 118.2, 114.7, 55.5; **HRMS** (APCI) calcd for C<sub>31</sub>H<sub>25</sub>NO<sub>3</sub> [M + H<sup>+</sup>], 460.1907; found:460.1902.

***N*-(3,5-dimethylphenyl)-*N*-(4-methoxyphenyl)-3,5-dimethylaniline (5n)**

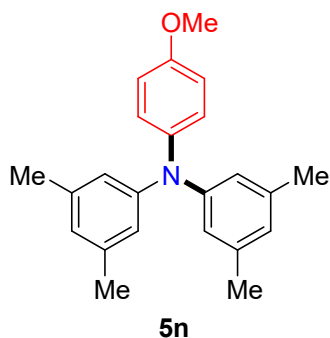

Following the general **Procedure D**, the title compound was isolated by flash column chromatography on silica gel (PE : EA = 100 : 1) as a white solid in 52 % (17.2 mg) yield. **<sup>1</sup>H NMR** (600 MHz, CDCl<sub>3</sub>) δ 7.06 (d, *J* = 8.9 Hz, 2H), 6.84 (d, *J* = 8.9 Hz, 2H), 6.67 (s, 4H), 6.62 (s, 2H), 3.82 (s, 3H), 2.22 (s, 12H); **<sup>13</sup>C NMR** (151 MHz, CDCl<sub>3</sub>) δ 155.7, 148.3, 141.2, 138.5, 127.1, 123.6, 120.9, 114.5, 55.4, 21.3; **HRMS** (APCI) calcd for C<sub>23</sub>H<sub>25</sub>NO [M + H<sup>+</sup>], 332.2009; found: 332.2004.

***N*-(4-methoxyphenyl)-3-methyl-*N*-(*m*-tolyl)aniline (5o)**

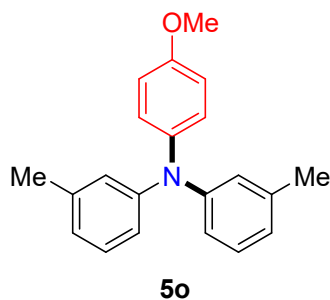

Following the general **Procedure D**, the title compound was isolated by flash column chromatography on silica gel (PE : EA = 100 : 1) as a yellow oil in 75 % (22.8 mg) yield. **<sup>1</sup>H NMR** (600 MHz, CDCl<sub>3</sub>) δ 7.11 (t, *J* = 7.8 Hz, 2H), 7.10 – 7.05 (m, 2H), 6.85 (ddd, *J* = 10.0, 6.8,

3.9 Hz, 6H), 6.78 (d,  $J = 7.5$  Hz, 2H), 3.82 (s, 3H), 2.26 (s, 6H);  $^{13}\text{C}$  NMR (151 MHz,  $\text{CDCl}_3$ )  $\delta$  155.9, 148.2, 141.0, 138.8, 128.8, 127.2, 123.6, 122.6, 120.2, 114.6, 55.4, 21.4; HRMS (APCI) calcd for  $\text{C}_{21}\text{H}_{21}\text{NO}$  [ $\text{M} + \text{H}^+$ ], 304.1696; found: 304.1692.

***N*-(9,9-dimethyl-9*H*-fluoren-2-yl)-*N*-(4-methoxyphenyl)-9,9-dimethyl-9*H*-fluoren-2-amine (5p)**

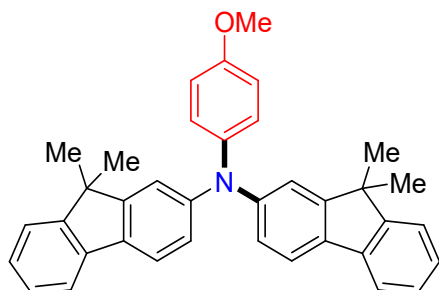

**5p**

Following the general **Procedure D**, the title compound was isolated by flash column chromatography on silica gel (PE : EA = 200 : 1) as a yellow solid in 59 % (29.9 mg) yield.  $^1\text{H}$  NMR (600 MHz,  $\text{CDCl}_3$ )  $\delta$  7.64 (dt,  $J = 7.5, 0.9$  Hz, 2H), 7.58 (d,  $J = 8.2$  Hz, 2H), 7.40 (dt,  $J = 7.4, 0.9$  Hz, 2H), 7.32 (td,  $J = 7.4, 1.2$  Hz, 2H), 7.26 (td,  $J = 7.4, 1.2$  Hz, 2H), 7.24 (d,  $J = 2.1$  Hz, 2H), 7.19 (d,  $J = 8.9$  Hz, 2H), 7.03 (dd,  $J = 8.2, 2.1$  Hz, 2H), 6.89 (d,  $J = 8.9$  Hz, 2H), 3.85 (s, 3H), 1.43 (s, 12H);  $^{13}\text{C}$  NMR (151 MHz,  $\text{CDCl}_3$ )  $\delta$  156.0, 154.9, 153.4, 147.9, 141.0, 139.1, 133.2, 127.1, 126.9, 126.2, 122.4, 121.9, 120.5, 119.2, 117.2, 114.7, 55.5, 46.7, 27.1; HRMS (APCI) calcd for  $\text{C}_{37}\text{H}_{33}\text{NO}$  [ $\text{M} + \text{H}^+$ ], 508.2635; found: 508.2632.

## 10. References

1. R. Calvo, K. Zhang, A. Passera and D. Katayev, *Nat. Commun.*, 2019, **10**, 3410.
2. O. A. Levitskiy and T. V. Magdesieva, *Org. Lett.*, 2019, **21**, 10028–10032.
3. A. Tlili, F. Monnier and M. Taillefer, *ChemComm*, 2012, **48** 6408–6410.
4. P. V. Kattamuri, J. Yin, S. Siriwongsup, D. H. Kwon, D. H. Ess, Q. Li, G. Li, M. Yousufuddin, P. F. Richardson, S. C. Sutton and L. Kurti, *J. Am. Chem. Soc.*, 2017, **139**, 11184–11196.
5. A. O. Adeniji, B. M. Twenter, M. C. Byrns, Y. Jin, M. Chen, J. D. Winkler and T. M. Penning, *J. Med. Chem.*, 2012, **55**, 2311–2323.
6. C. T. Yang, Z. Q. Zhang, Y. C. Liu and L. Liu, *Angew. Chem. Int. Ed.*, 2011, **50**, 3904–3907.
7. K. Wang, Z. H. Deng, S. J. Xie, D. D. Zhai, H. Y. Fang and Z. J. Shi, *Nat. Commun.*, 2021, **12**, 248.
8. A. V. Aksenov, N. A. Aksenov, N. A. Orazova, D. A. Aksenov, M. V. Dmitriev and M. Rubin, *RSC Adv.*, 2015, **5**, 84849–84855.
9. K. Lim, C. Kim, J. Song, T. Yu, W. Lim, K. Song, P. Wang, N. Zu and J. Ko, *J. Phys. Chem. C*, 2011, **115**, 22640–22646.
10. K.-T. Wong, Y.-H. Lin, H.-H. Wu and F. Fungo, *Org. Lett.*, 2007, **9**, 4531–4534.
11. C.-C. Lee, M.-k. Leung, P.-Y. Lee, T.-L. Chiu, J.-H. Lee, C. Liu and P.-T. Chou, *Macromolecules*, 2011, **45**, 751–765.
12. W.-j. Zhang, X.-c. Lin, F. Li, Z.-j. Huang, C.-b. Gong and Q. Tang, *New J. Chem.*, 2020, **44**, 16412–16420.
13. H. B. Goodbrand and N.-X. Hu, *J. Org. Chem.*, 1999, **64**, 670–674.
14. W. Chen, K. Chen, W. Chen, M. Liu and H. Wu, *ACS Catal.*, 2019, **9**, 8110–8115.
15. R. Takahashi, K. Kubota and H. Ito, *ChemCommun*, 2020, **56**, 407–410.
16. G. Li, L. Yang, J. J. Liu, W. Zhang, R. Cao, C. Wang, Z. Zhang, J. Xiao and D. Xue, *Angew. Chem. Int. Ed.*, 2021, **60**, 5230–5234.
17. X. Guan, H. Zhu and T. G. Driver, *ACS Catal.*, 2021, **11**, 12417–12422.
18. V. Dhayalan, C. Sämann and P. Knochel, *ChemCommun*, 2015, **51**, 3239–3242.
19. Y. Feng, H. Luo, F. Yu, Q. Liao and L. Lin, *Green Chem.*, 2023, **25**, 2361–2367.
20. F. Inoue, M. Kashiara, M. R. Yadav and Y. Nakao, *Angew. Chem. Int. Ed.*, 2017, **56**, 13307–13309.
21. M.-Q. Yan, J. Yuan, Y.-X. Pi, J.-H. Liang, Y. Liu, Q.-G. Wu, X. Luo, S.-H. Liu, J. Chen, X.-L. Zhu and G.-A. Yu, *Org. Biomol. Chem.*, 2016, **14**, 451–454.



## 11. NMR Spectra of Starting Materials and Products

### <sup>1</sup>H NMR Spectrum of **1x**

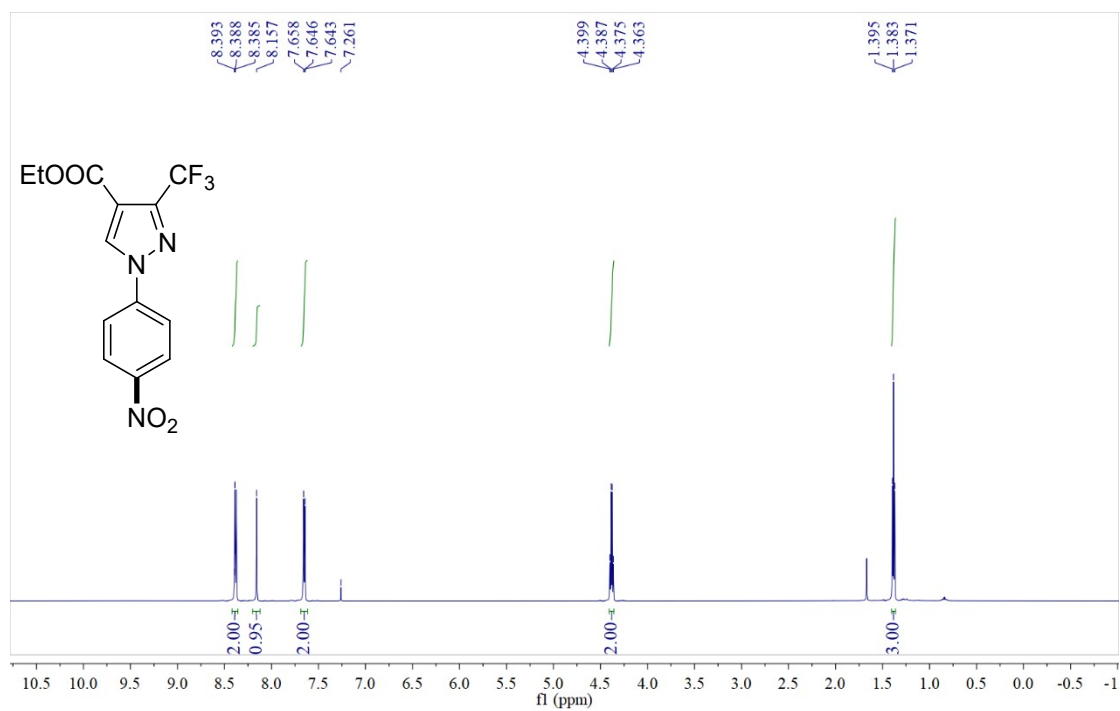

### <sup>13</sup>C NMR Spectrum of **1x**

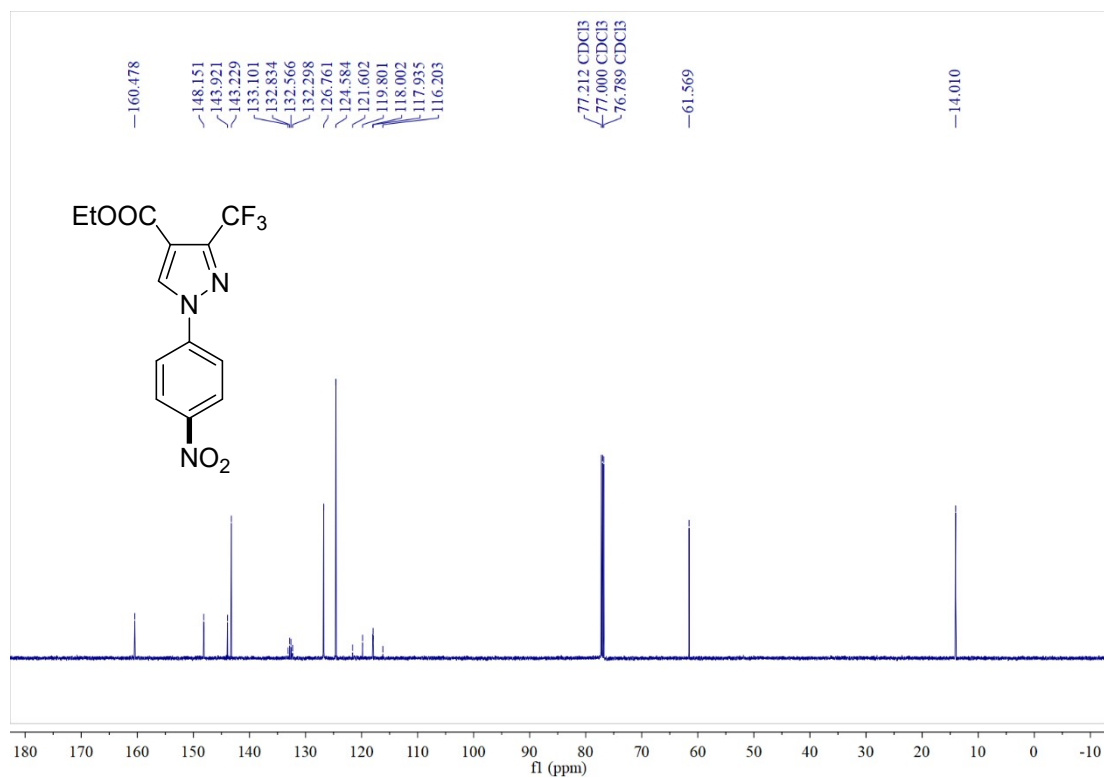

### <sup>19</sup>F NMR Spectrum of **1x**

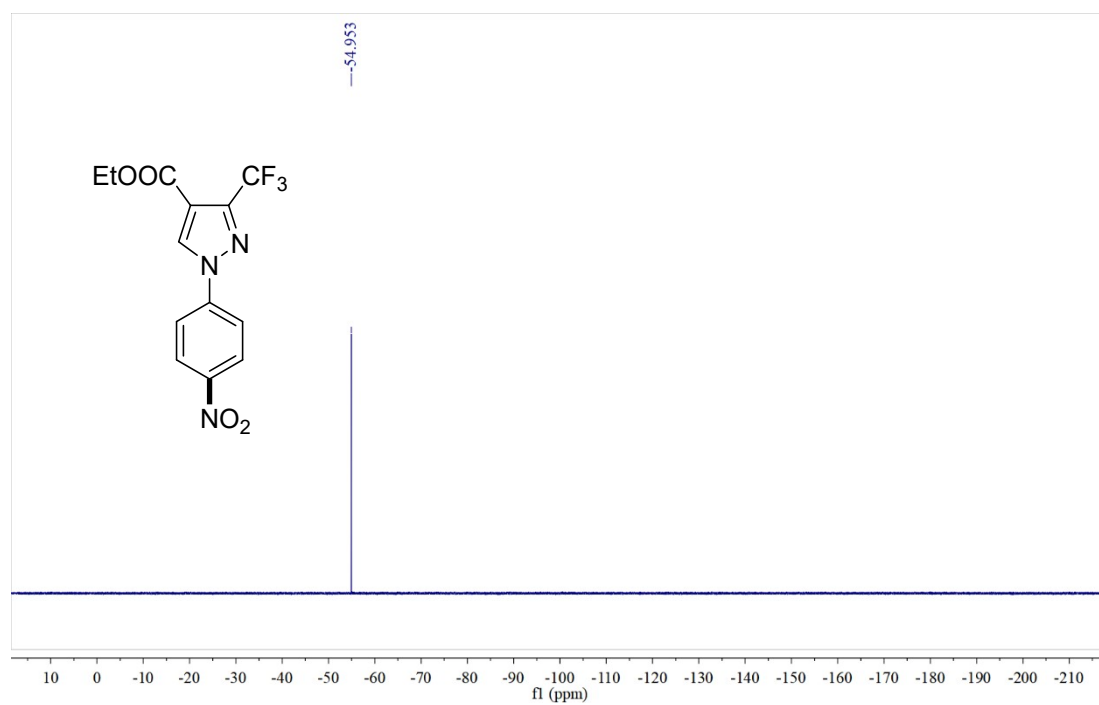

### <sup>1</sup>H NMR Spectrum of **1y**

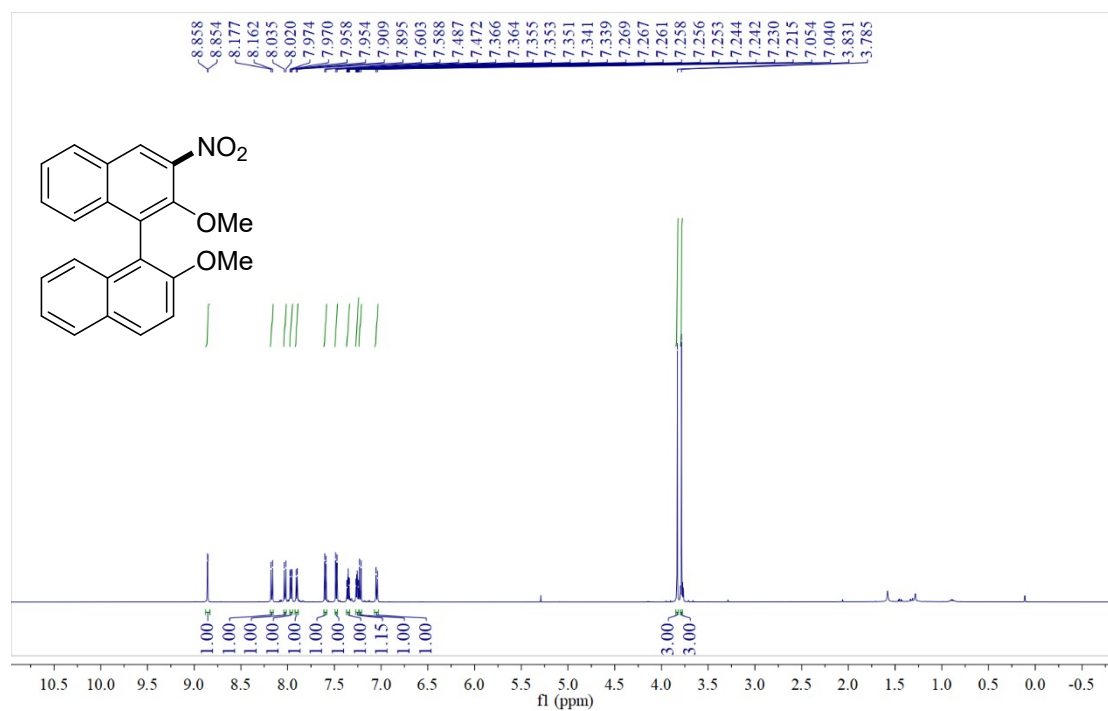

### <sup>13</sup>C NMR Spectrum of **1y**

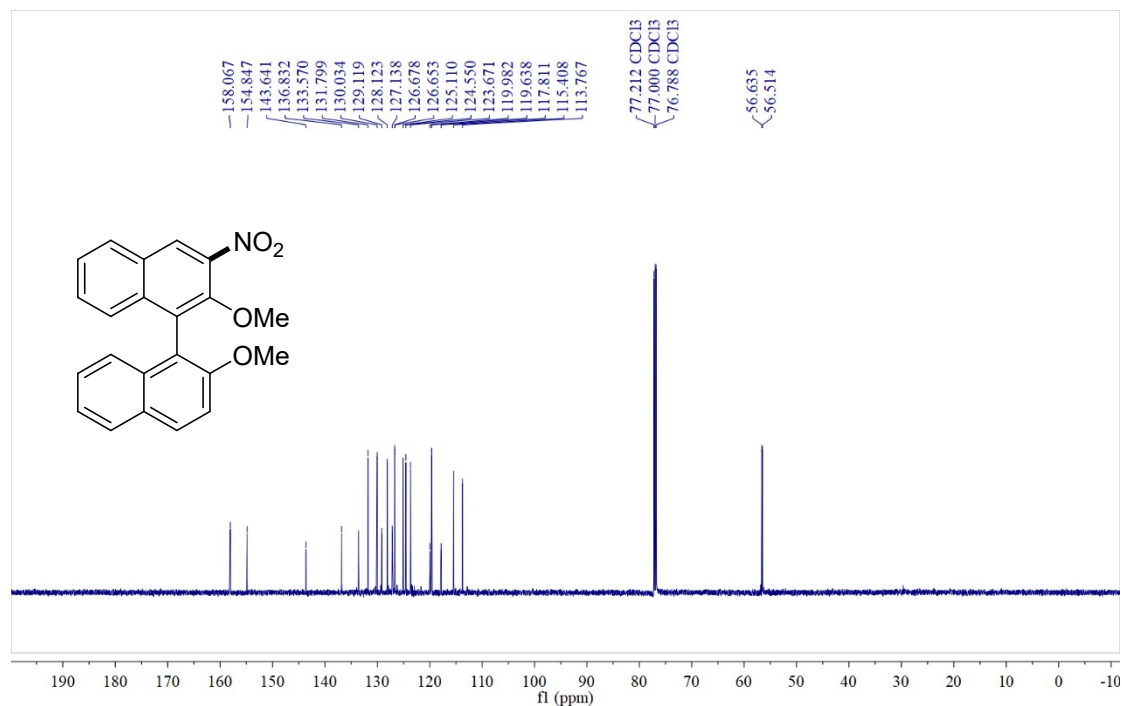

### <sup>1</sup>H NMR Spectrum of **2a**

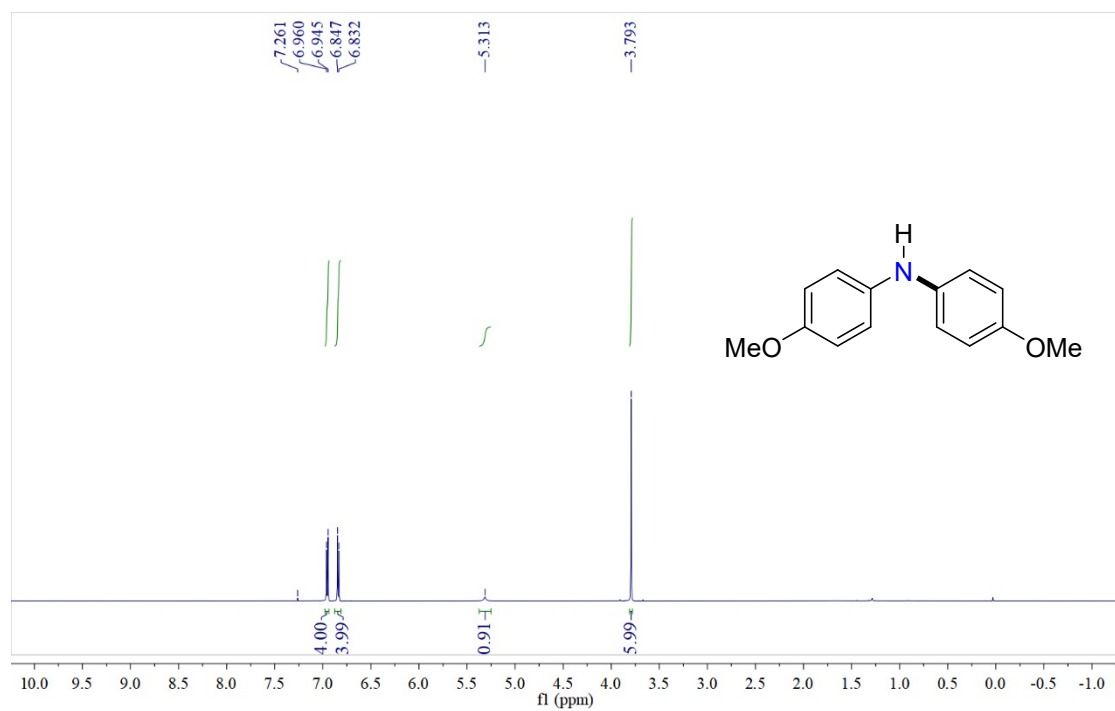

### $^{13}\text{C}$ NMR Spectrum of **2a**

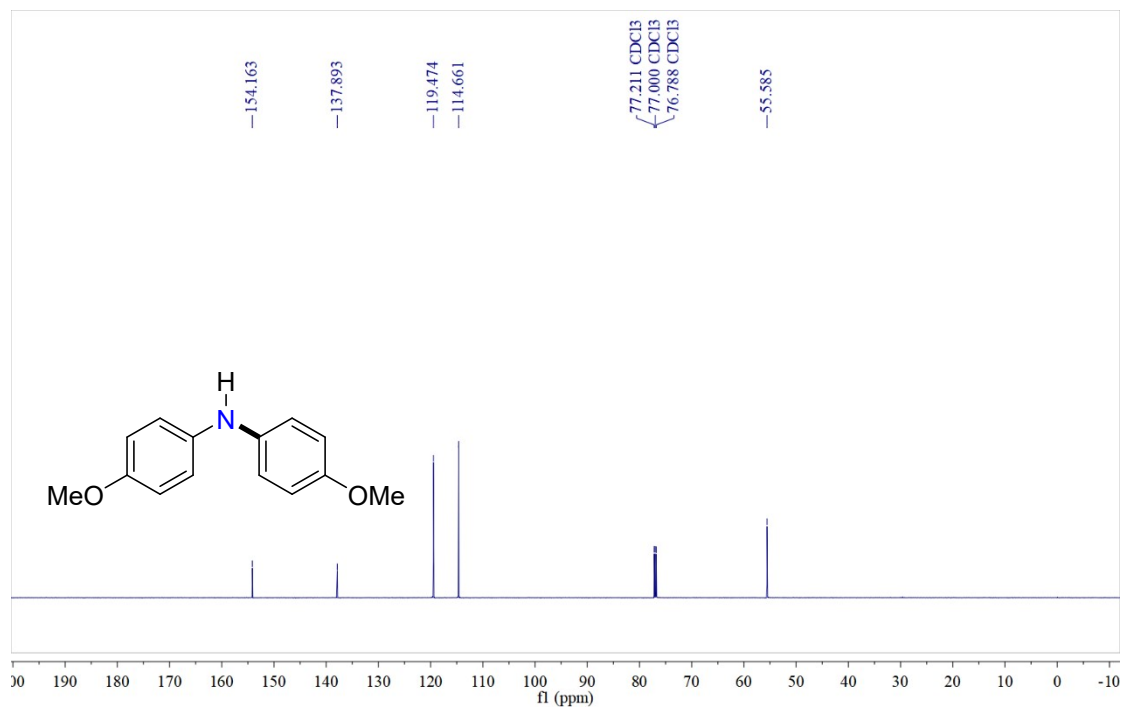

### $^1\text{H}$ NMR Spectrum of **2b**

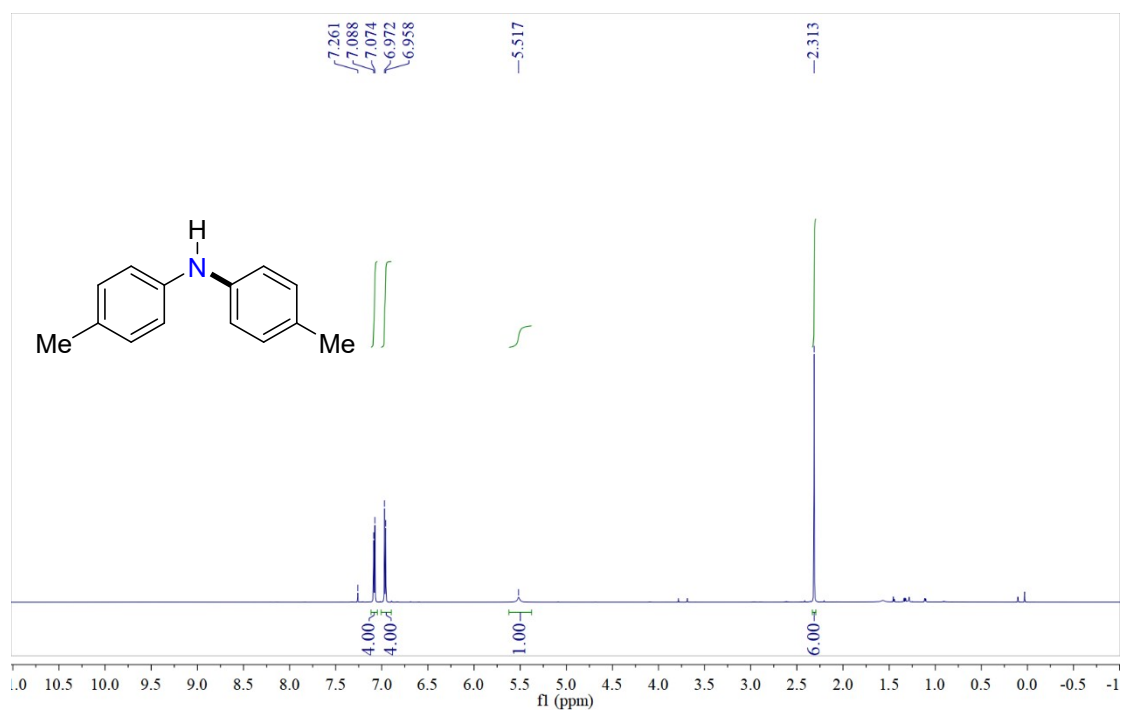

### $^{13}\text{C}$ NMR Spectrum of **2b**

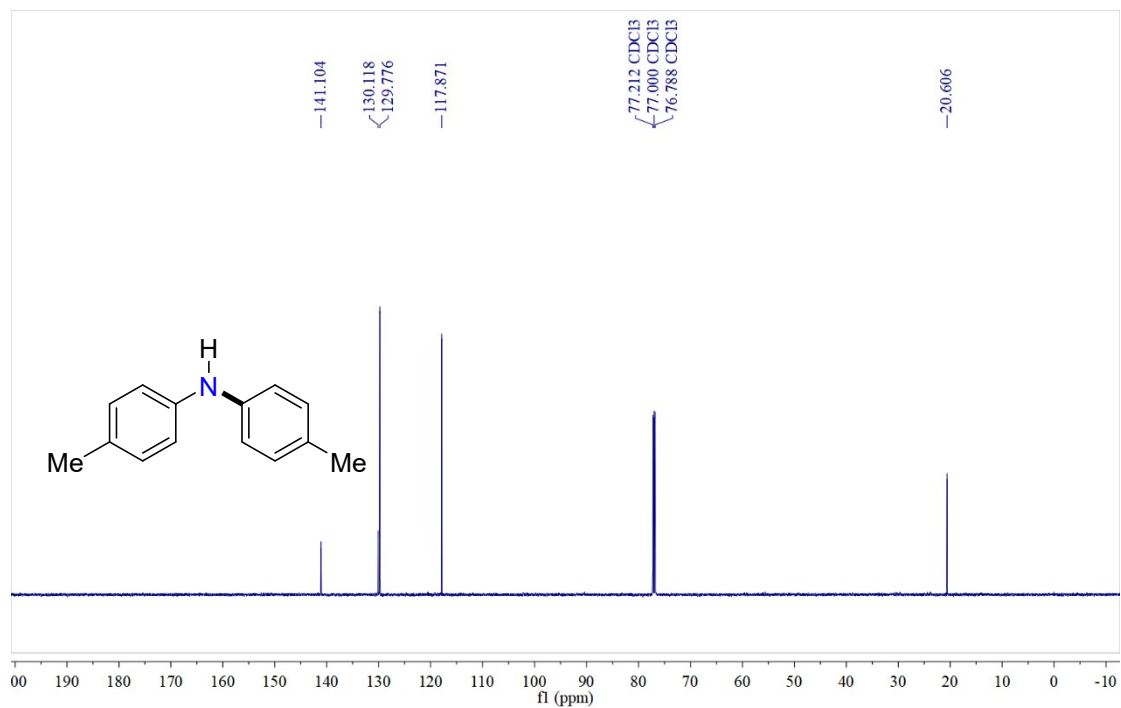

### $^1\text{H}$ NMR Spectrum of **2c**

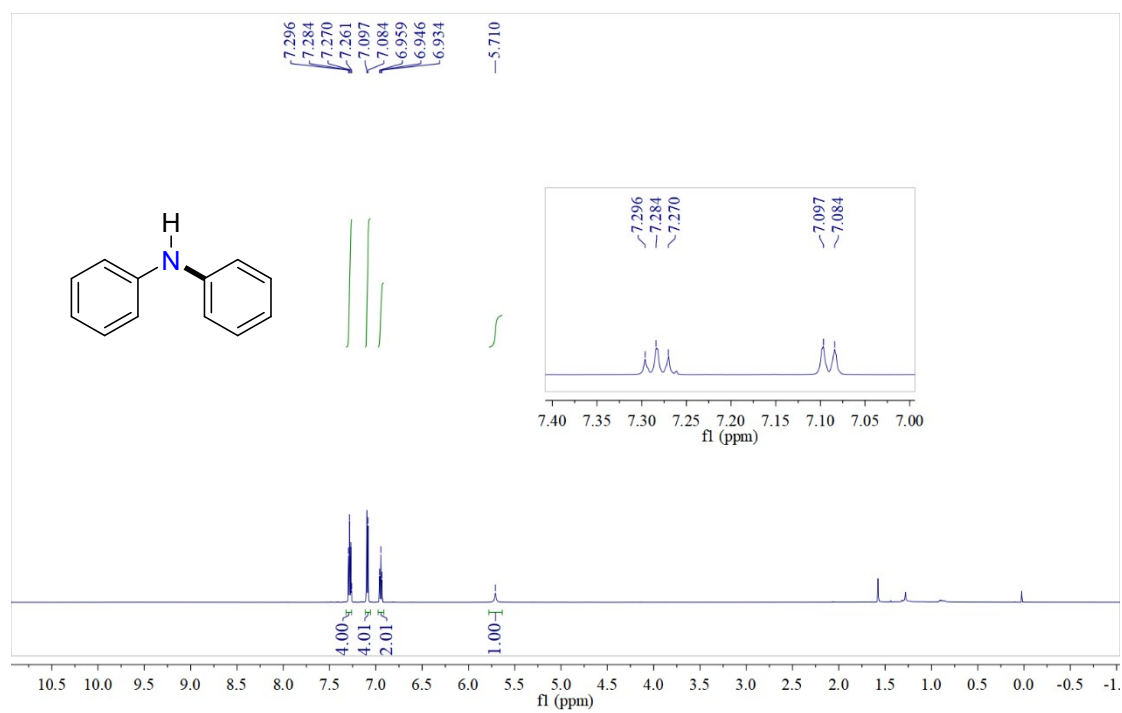

### $^{13}\text{C}$ NMR Spectrum of **2c**

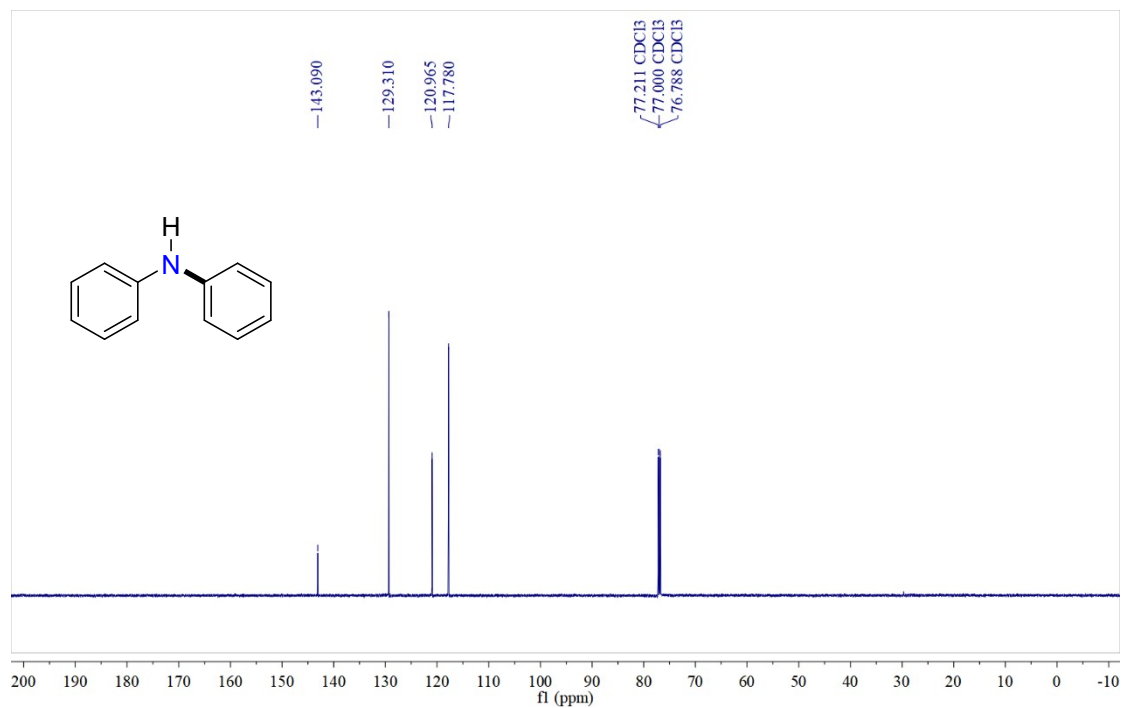

### $^1\text{H}$ NMR Spectrum of **2d**

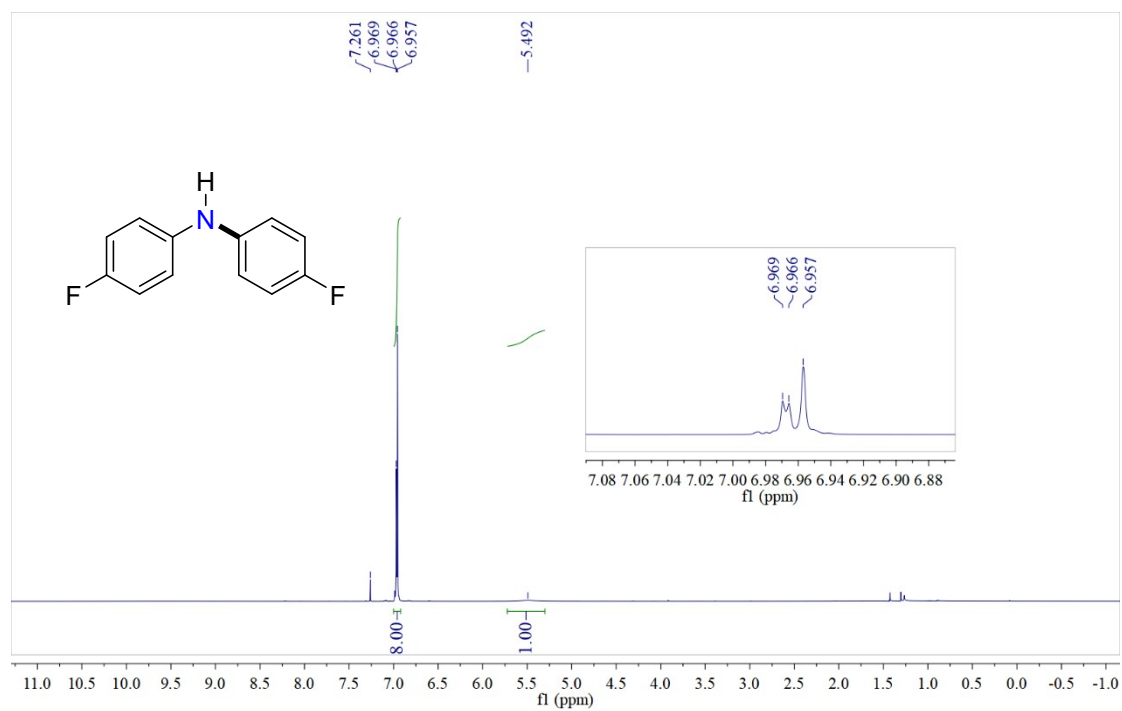

### <sup>13</sup>C NMR Spectrum of **2d**

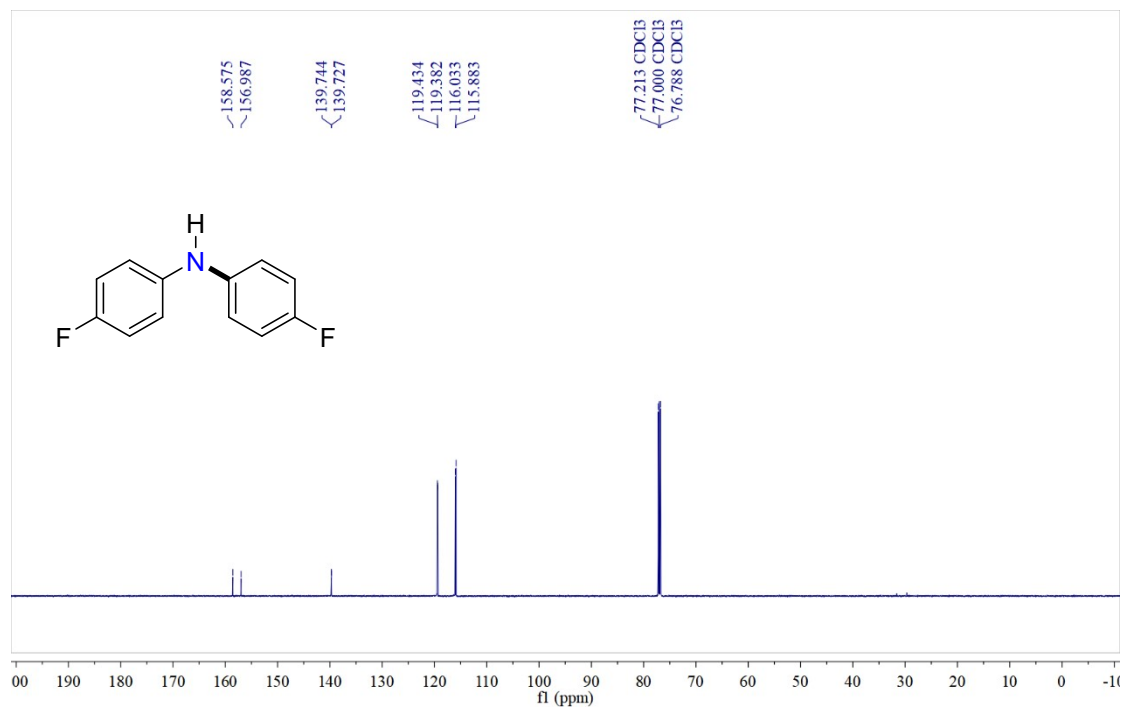

### <sup>19</sup>F NMR Spectrum of **2d**

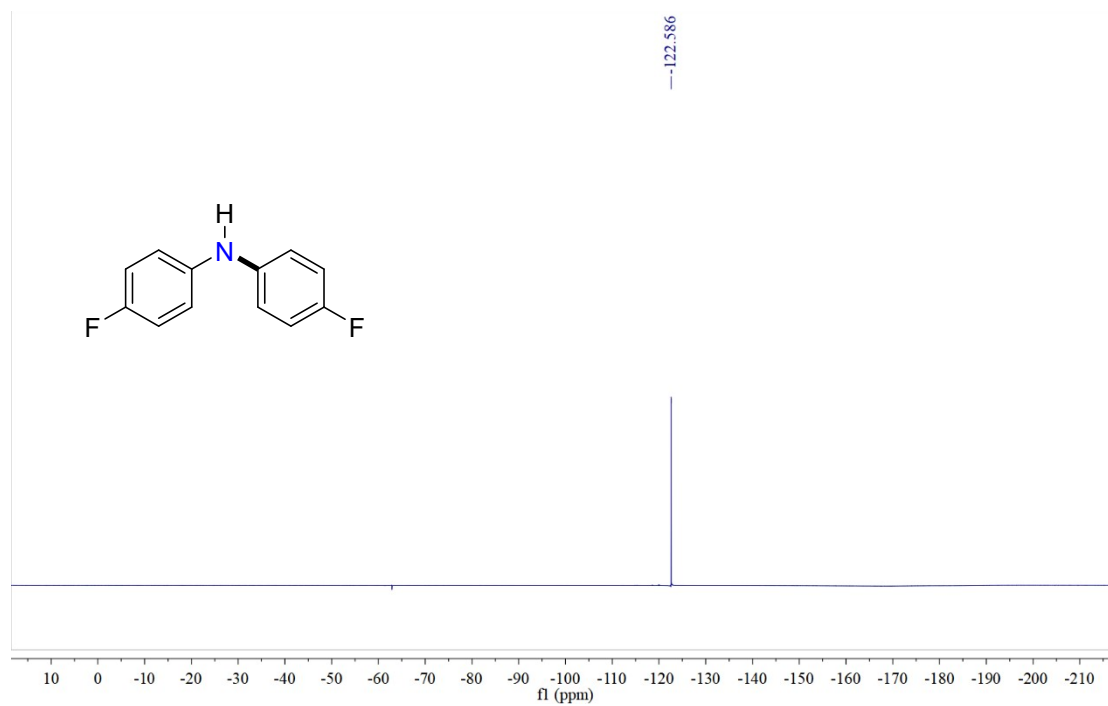

### <sup>1</sup>H NMR Spectrum of **2e**

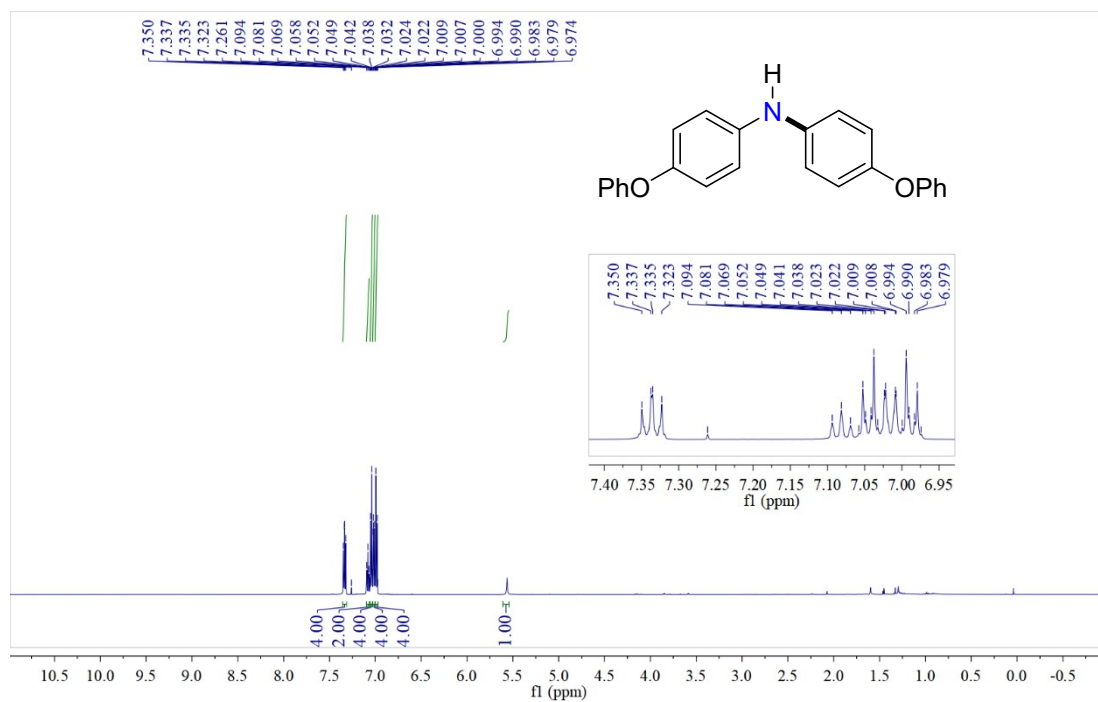

### <sup>13</sup>C NMR Spectrum of **2e**

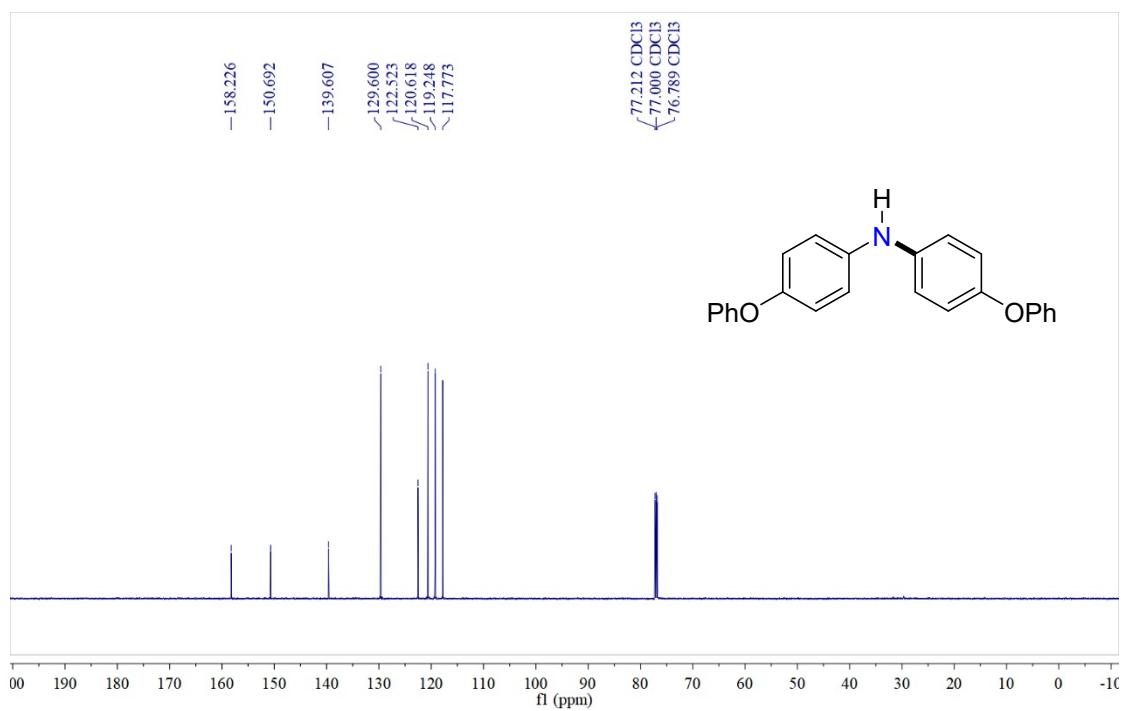



### <sup>1</sup>H NMR Spectrum of **2f**

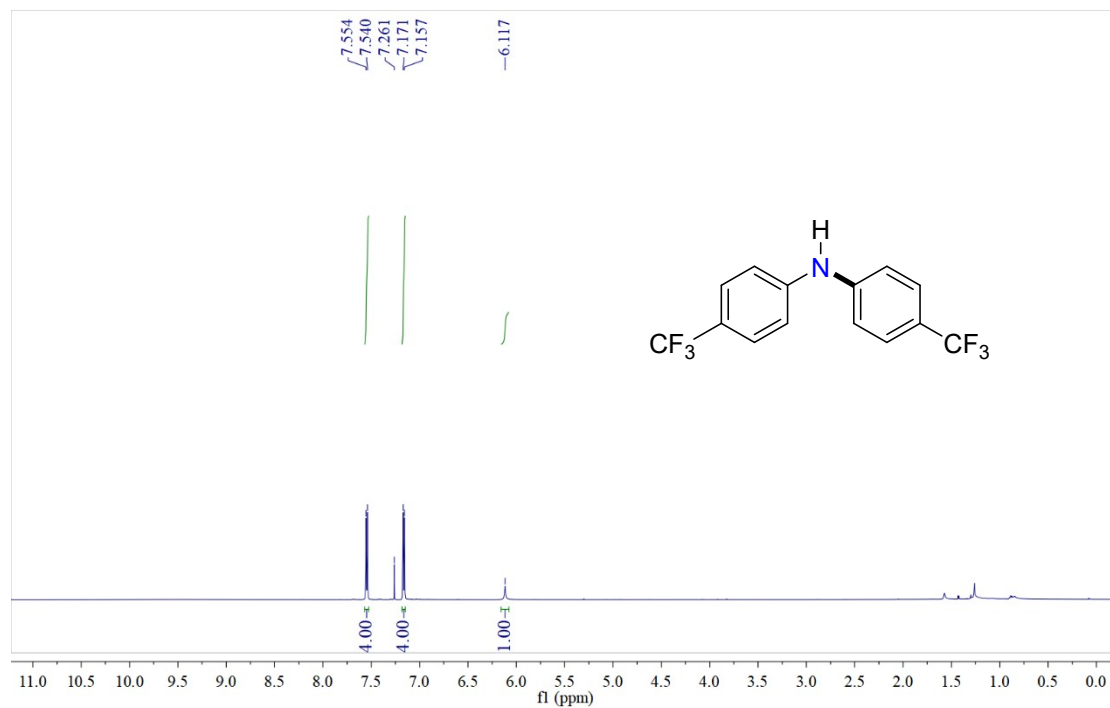

### <sup>13</sup>C NMR Spectrum of **2f**

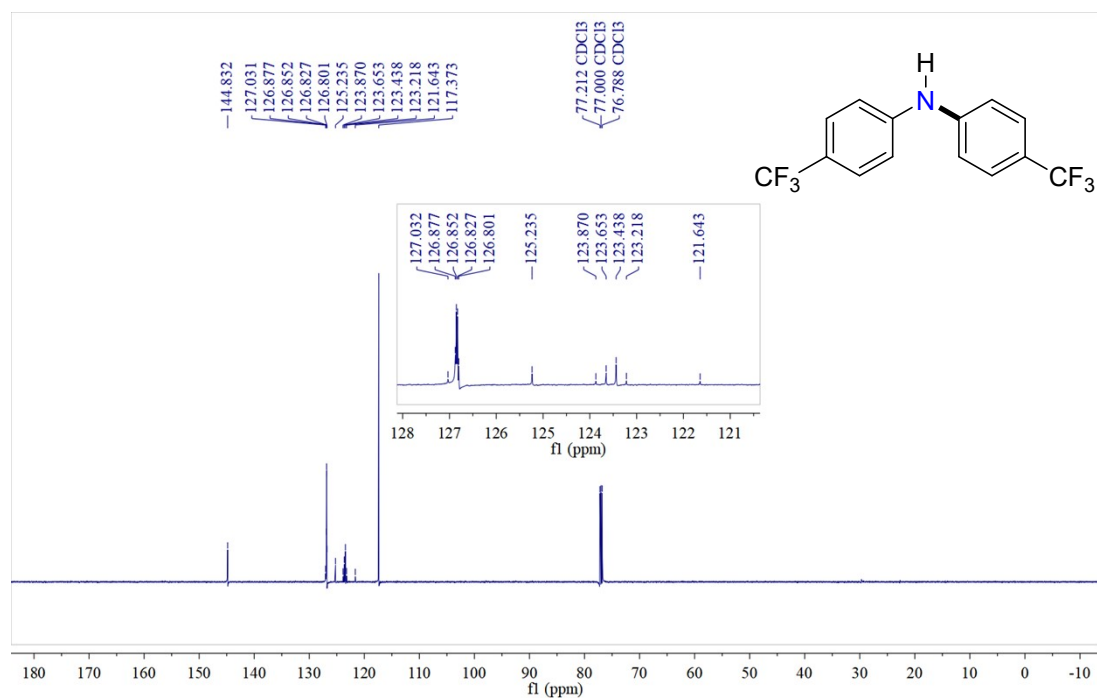

### <sup>19</sup>F NMR Spectrum of **2f**

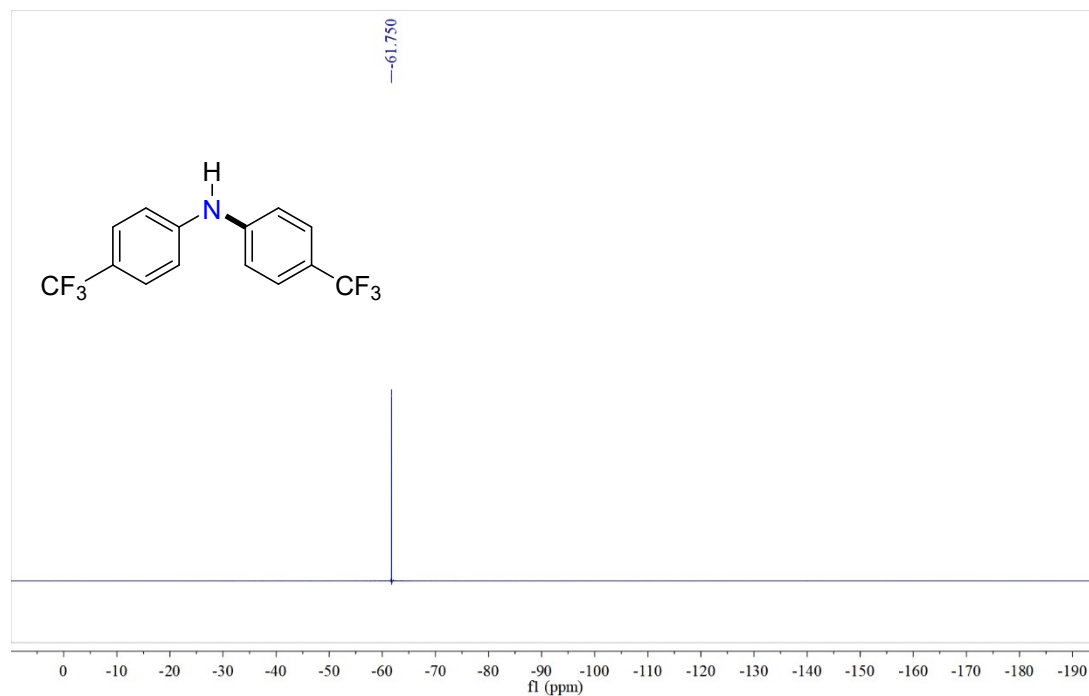

### <sup>1</sup>H NMR Spectrum of **2g**

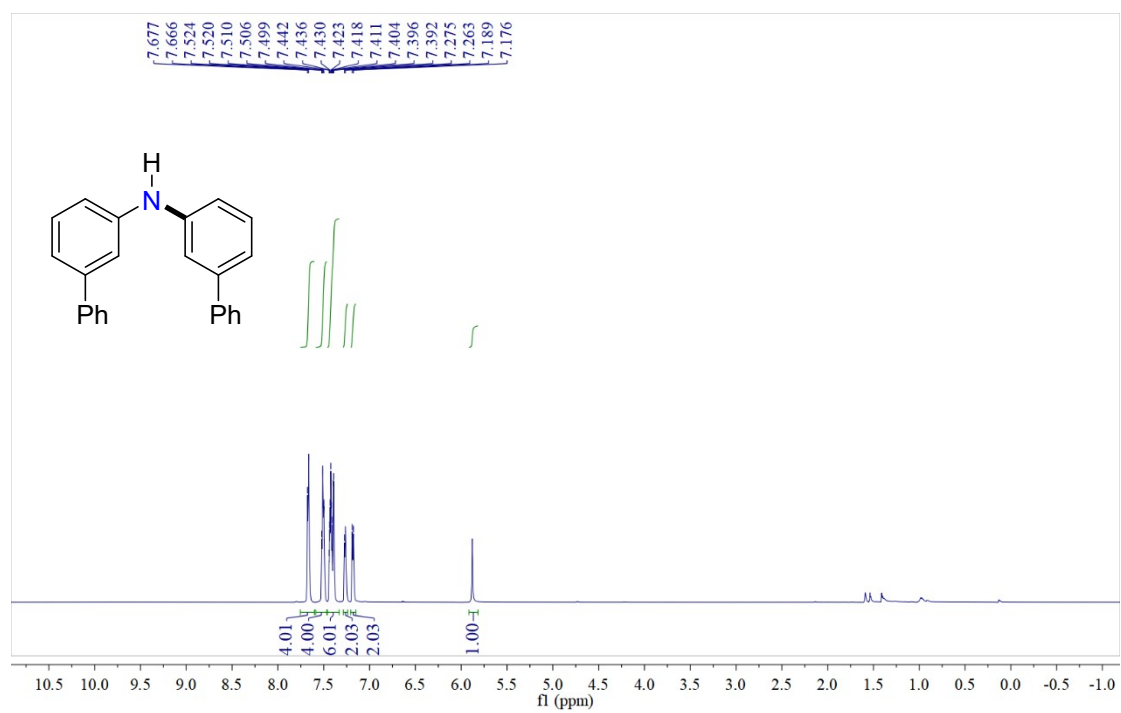

### <sup>13</sup>C NMR Spectrum of **2g**

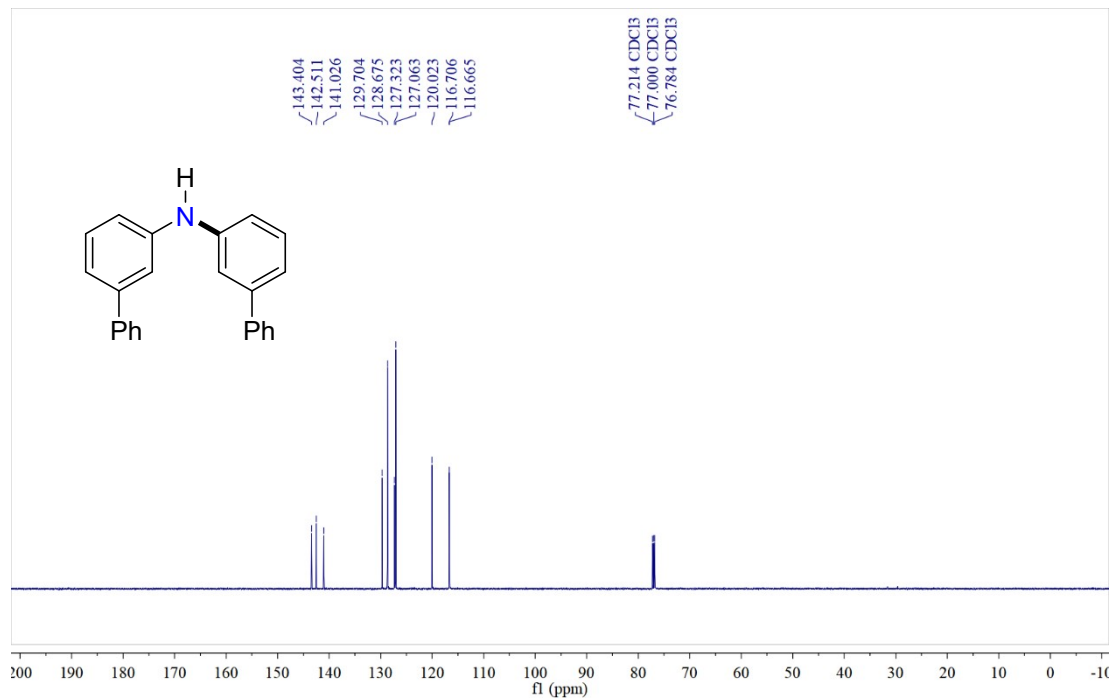

### <sup>1</sup>H NMR Spectrum of **2h**

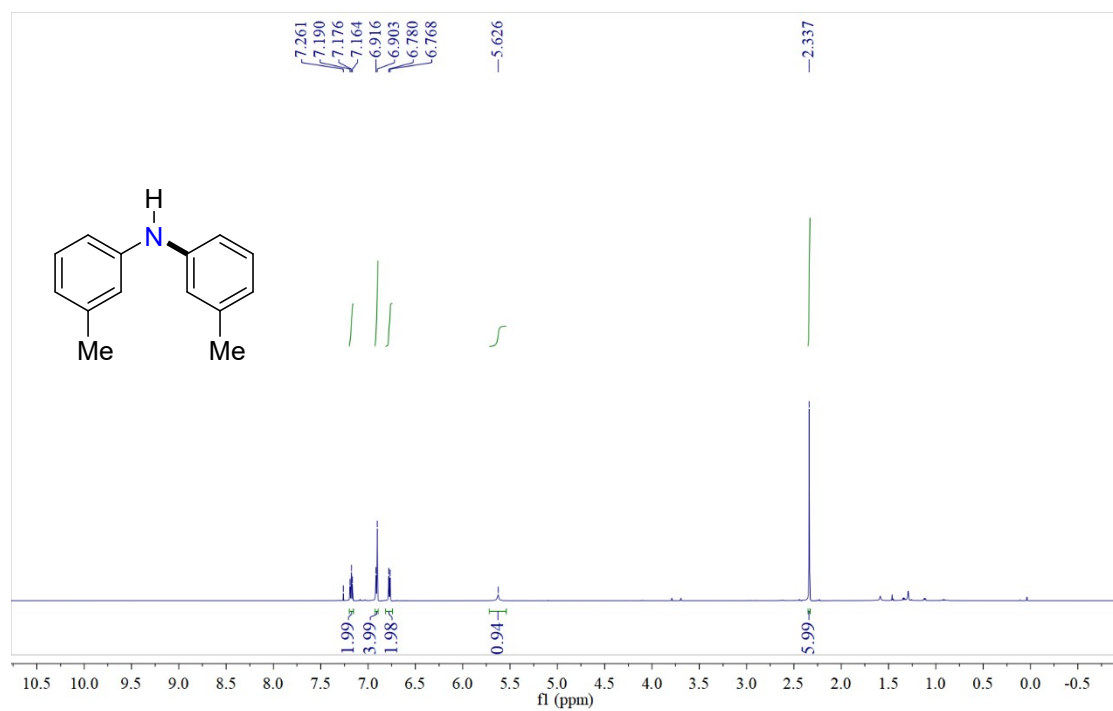

### <sup>13</sup>C NMR Spectrum of **2h**

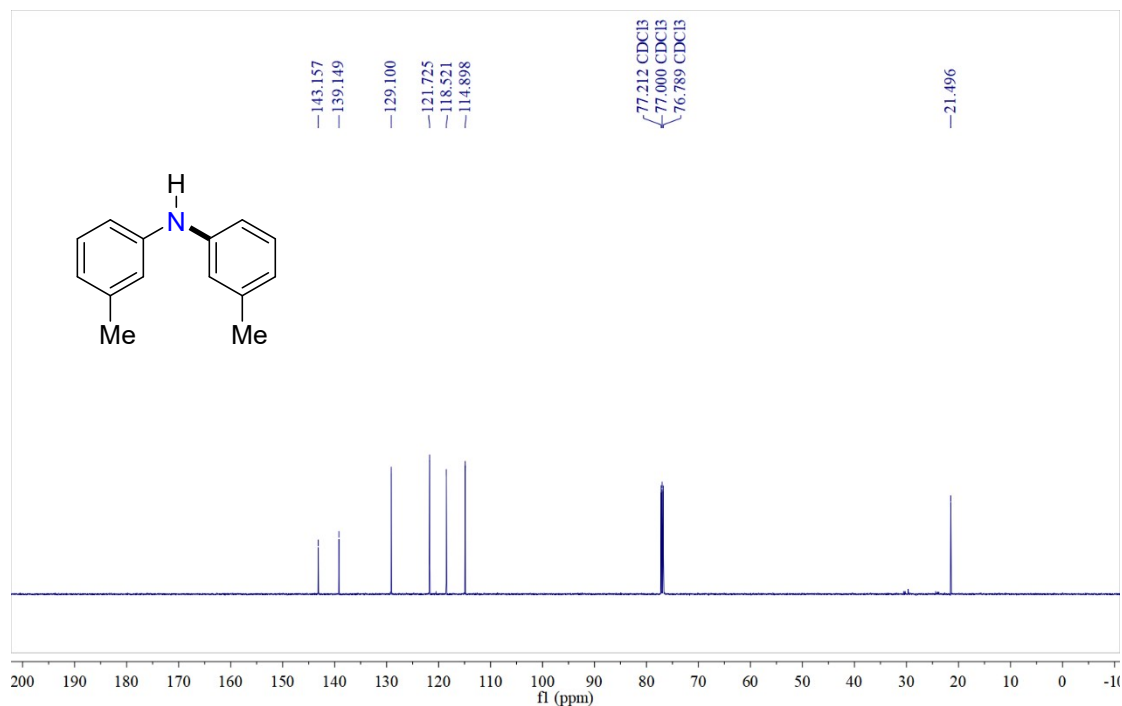

### <sup>1</sup>H NMR Spectrum of **2i**

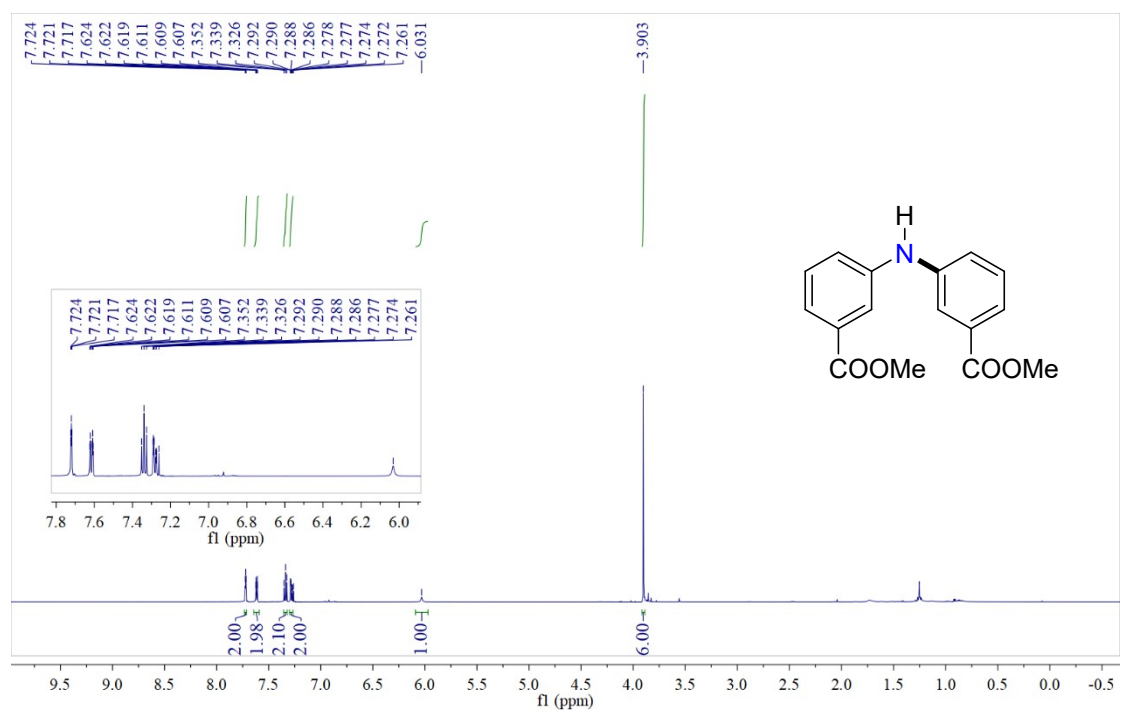

### <sup>13</sup>C NMR Spectrum of **2i**

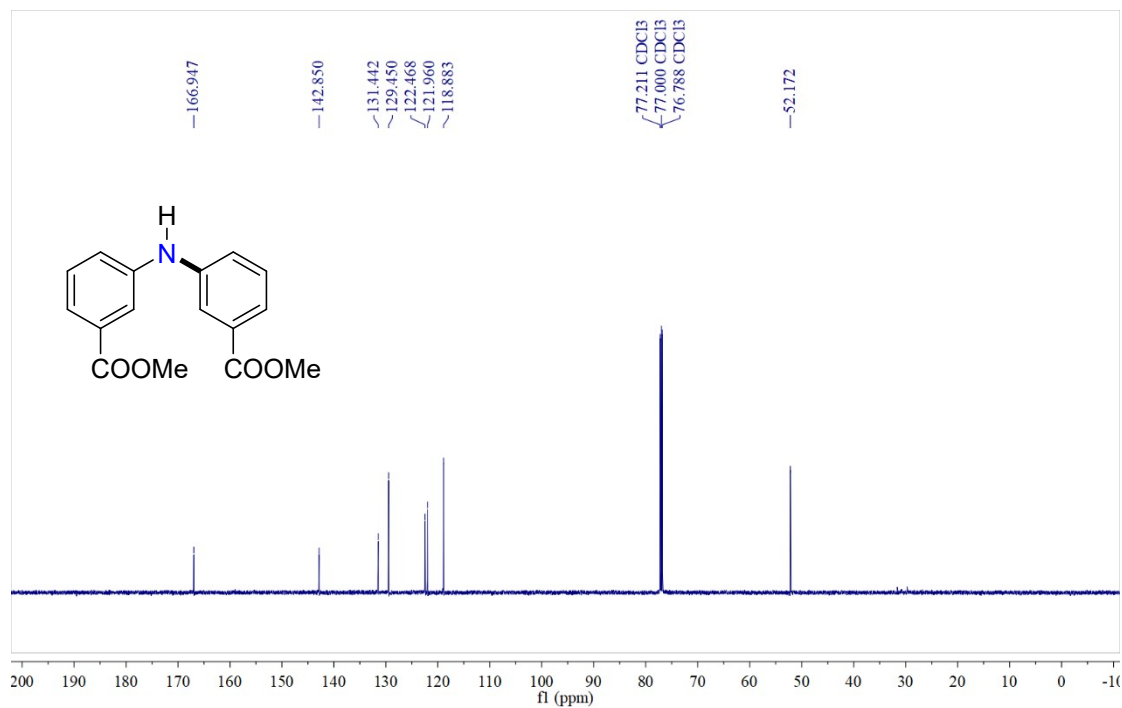

### <sup>1</sup>H NMR Spectrum of **2j**

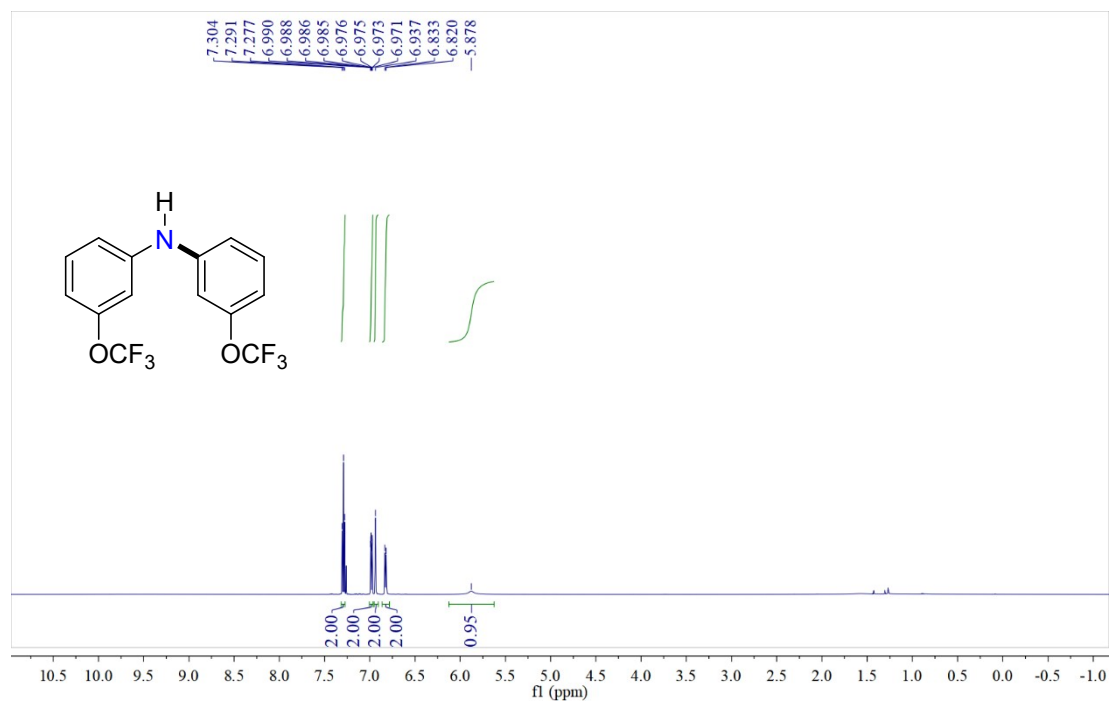

### <sup>13</sup>C NMR Spectrum of **2j**

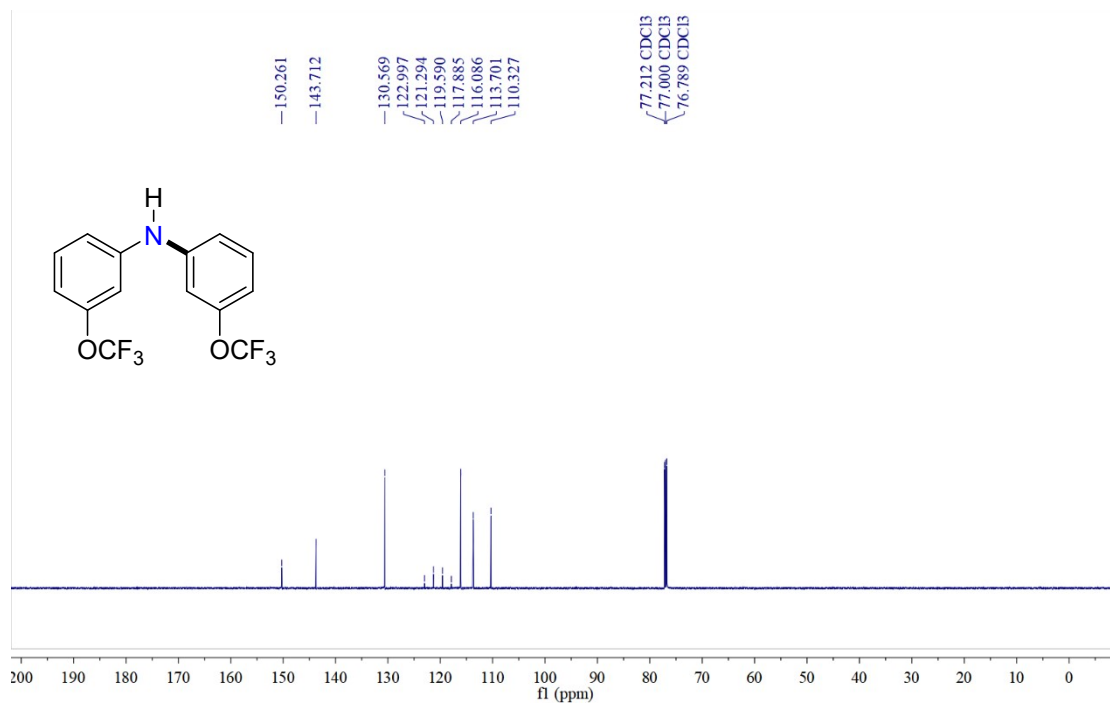

### <sup>19</sup>F NMR Spectrum of **2j**

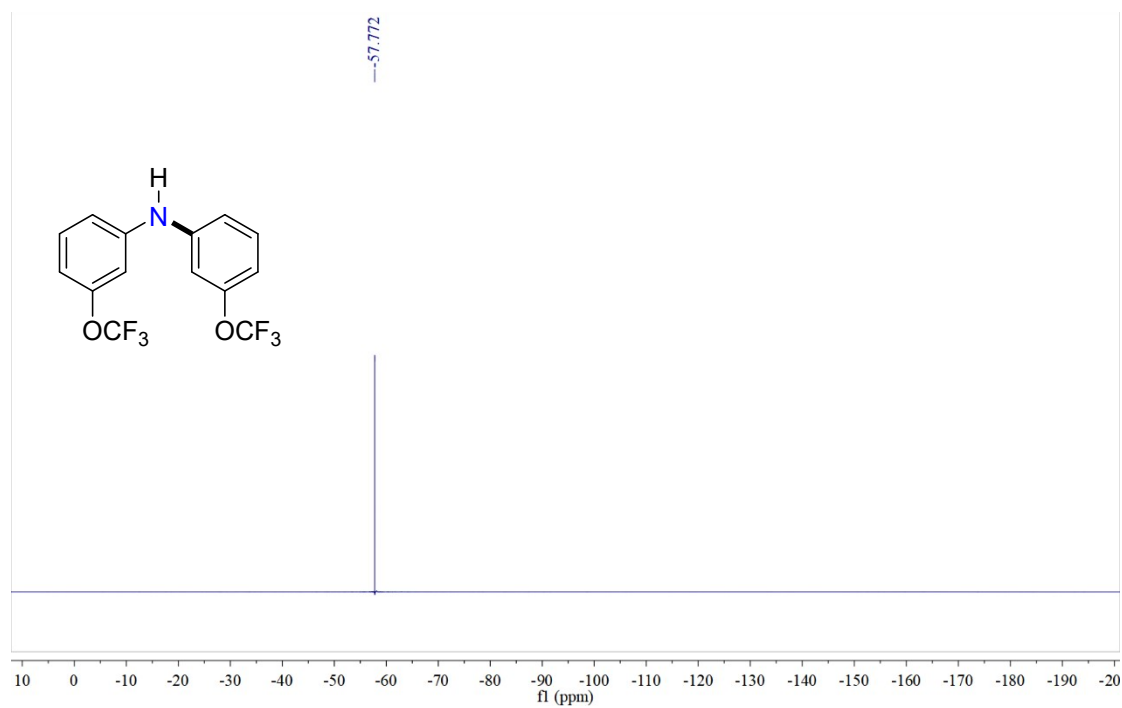

### <sup>1</sup>H NMR Spectrum of **2k**

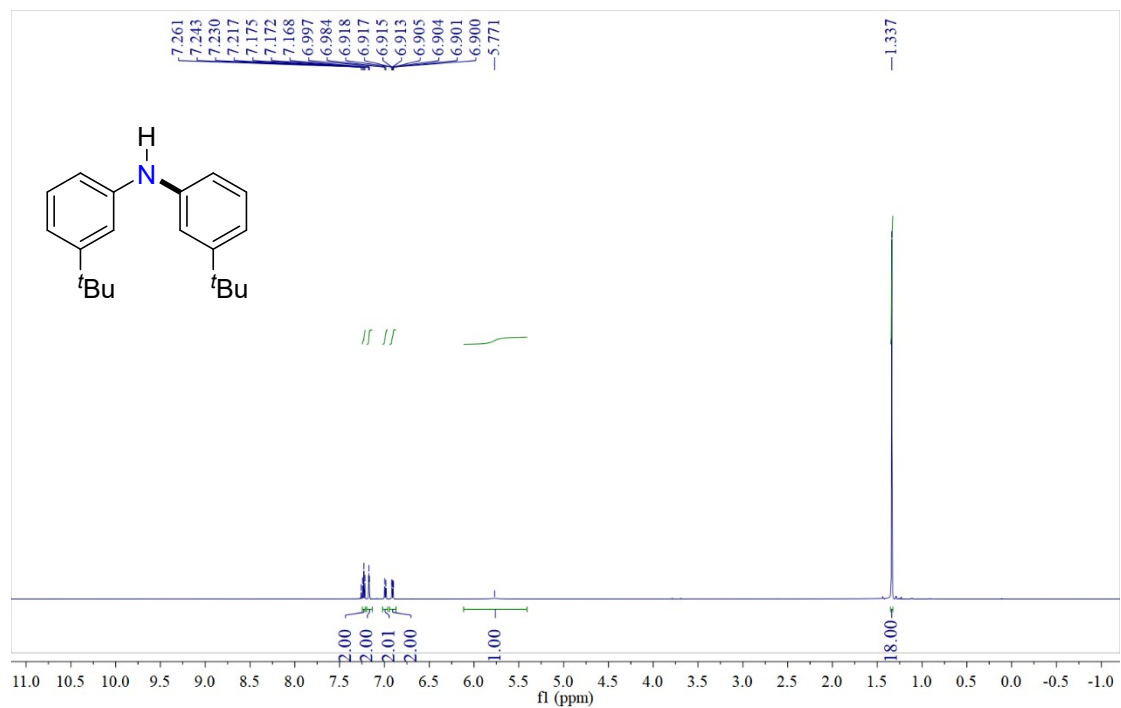

### <sup>13</sup>C NMR Spectrum of **2k**

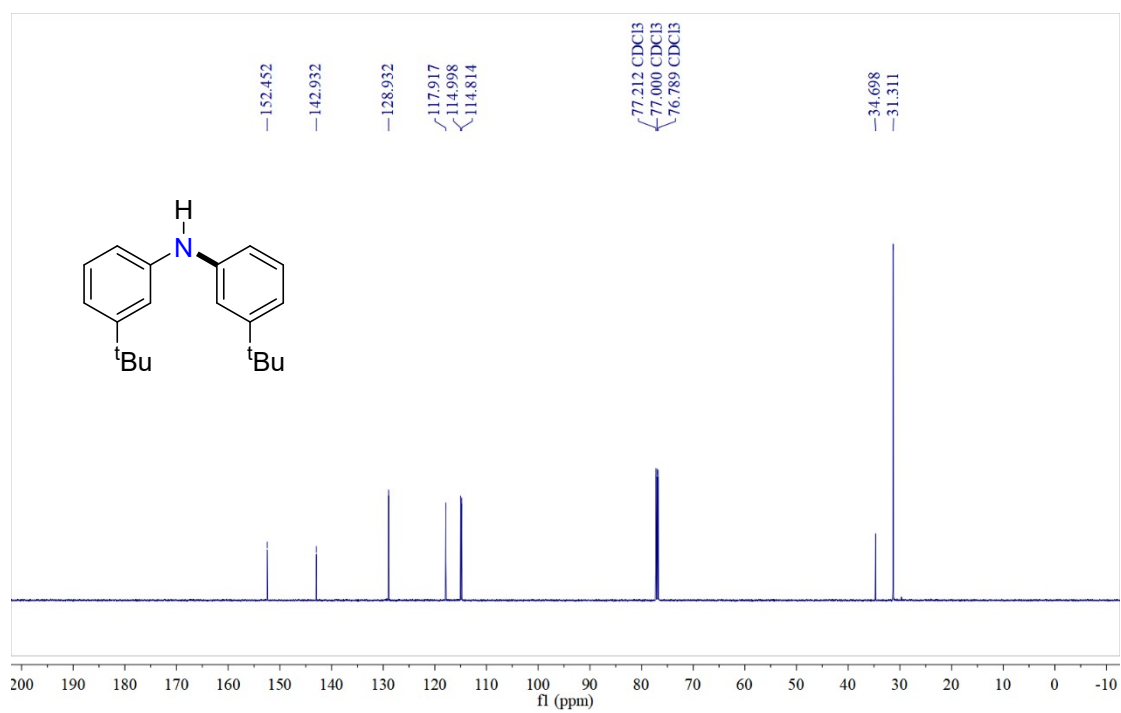

### <sup>1</sup>H NMR Spectrum of **21**

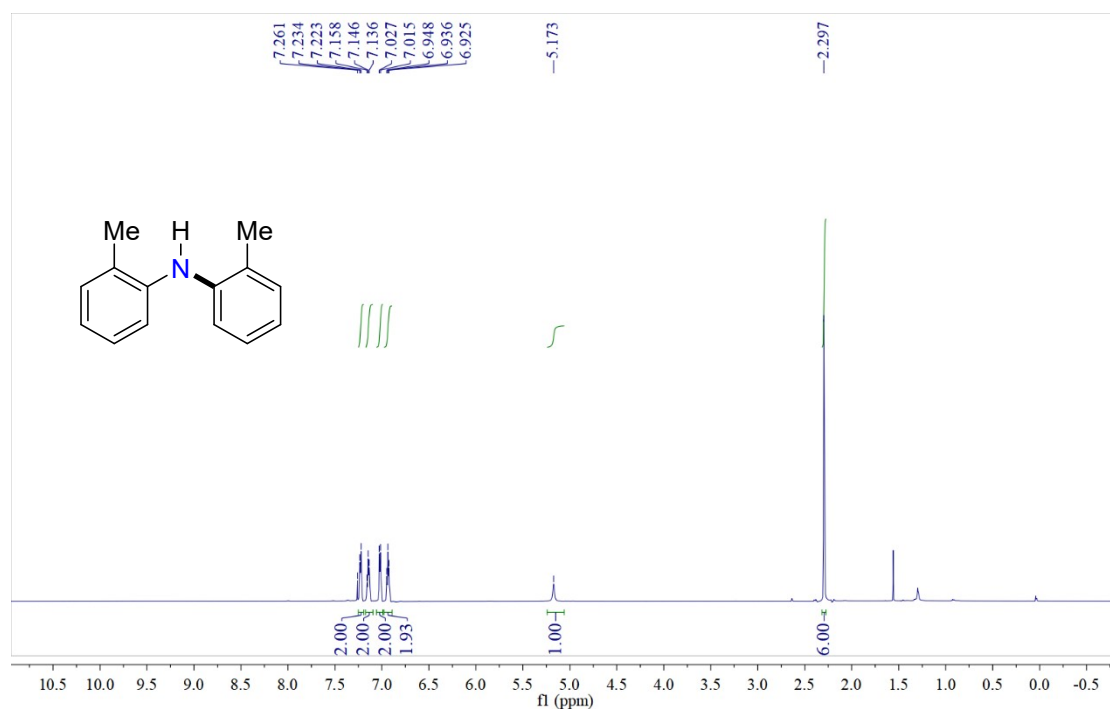

### <sup>13</sup>C NMR Spectrum of **21**

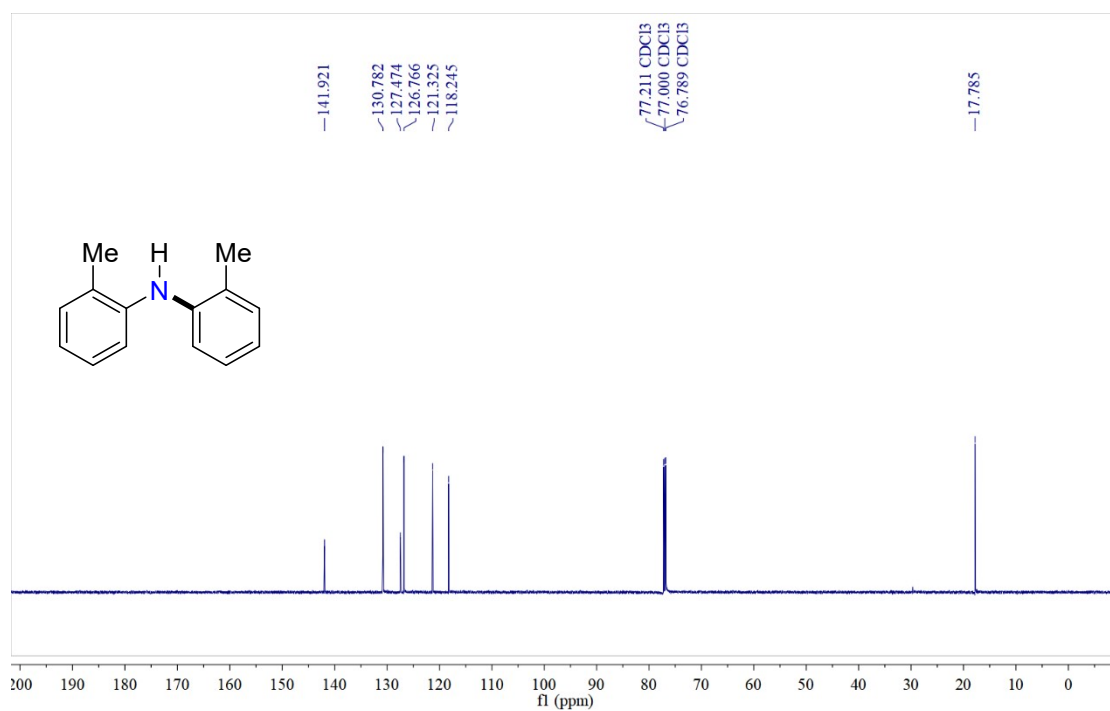



### <sup>1</sup>H NMR Spectrum of **2m**

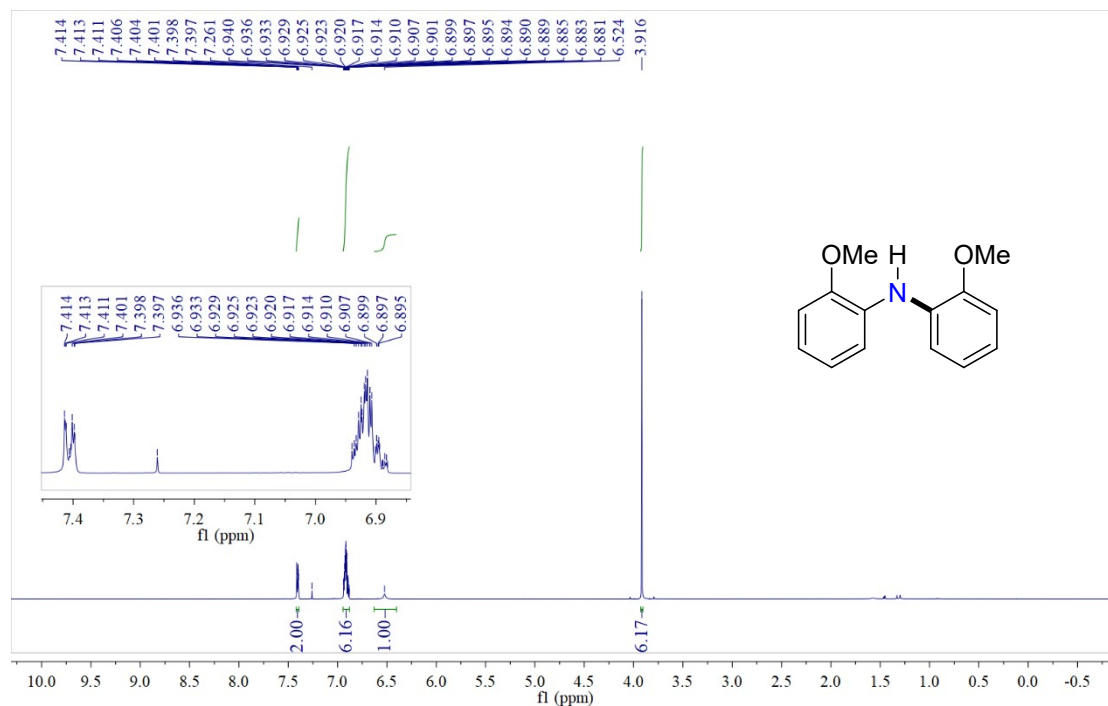

### <sup>13</sup>C NMR Spectrum of **2m**

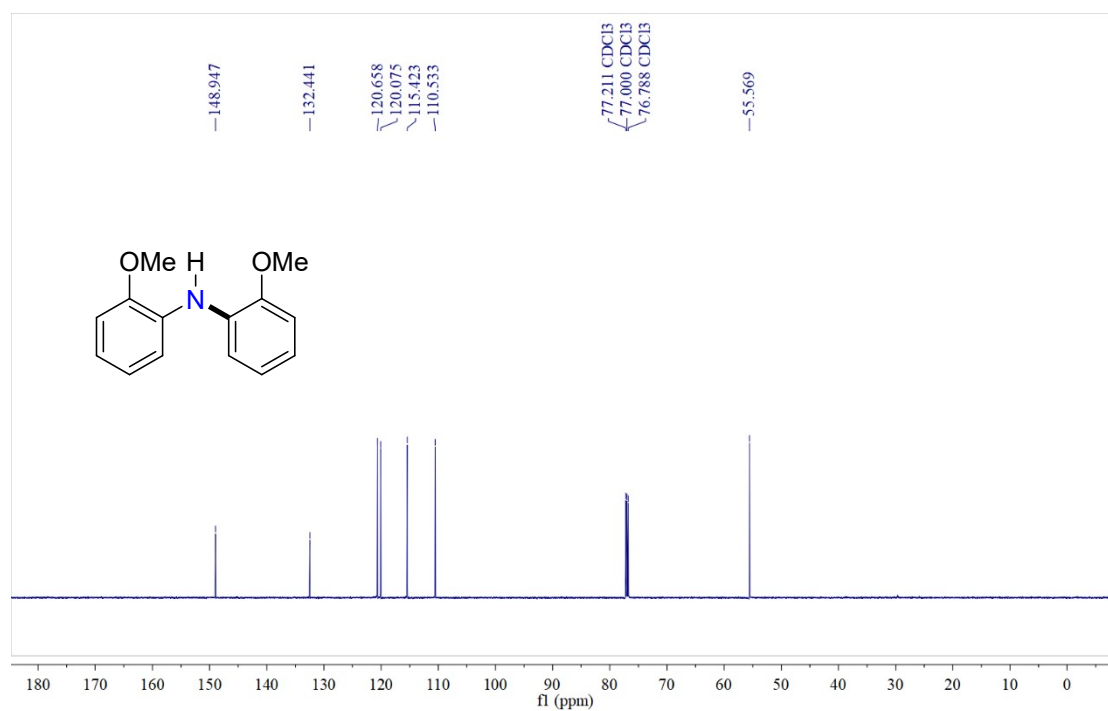

### <sup>1</sup>H NMR Spectrum of **2n**

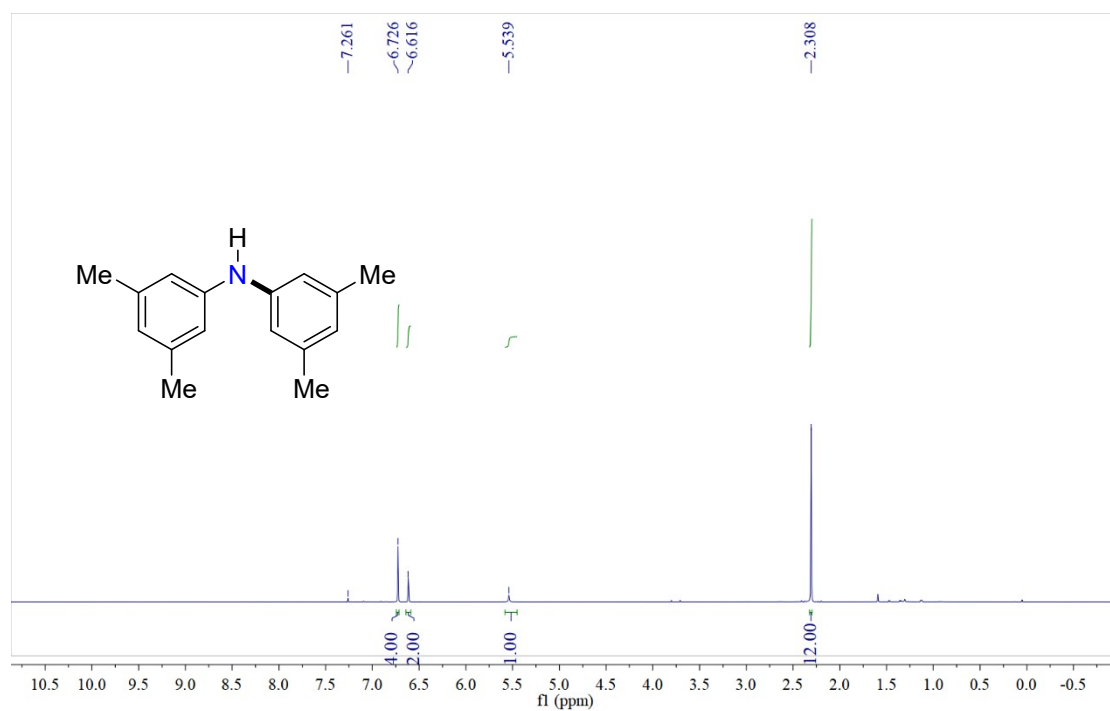

### <sup>13</sup>C NMR Spectrum of **2n**

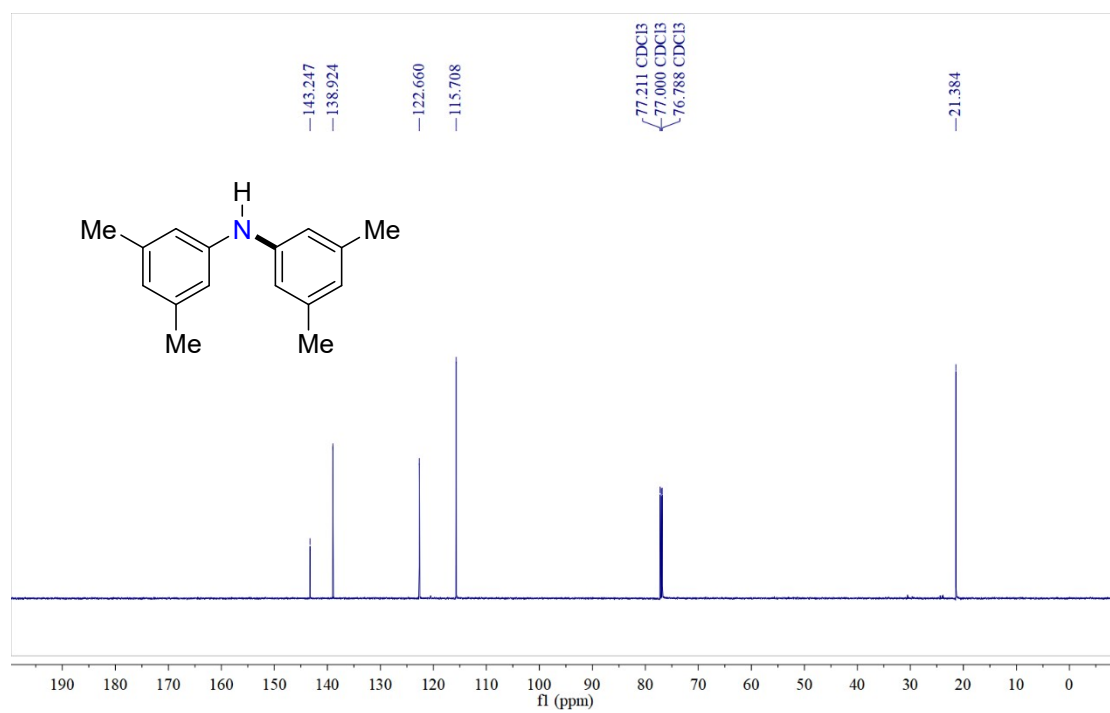

### <sup>1</sup>H NMR Spectrum of **2o**

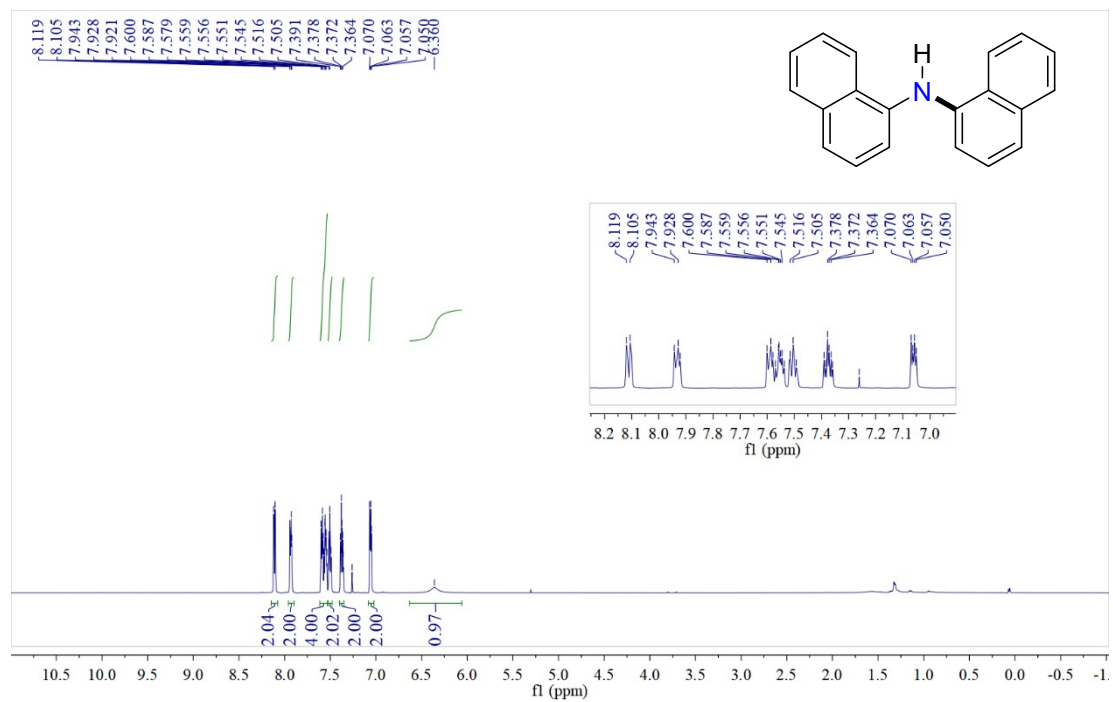

### <sup>13</sup>C NMR Spectrum of **2o**

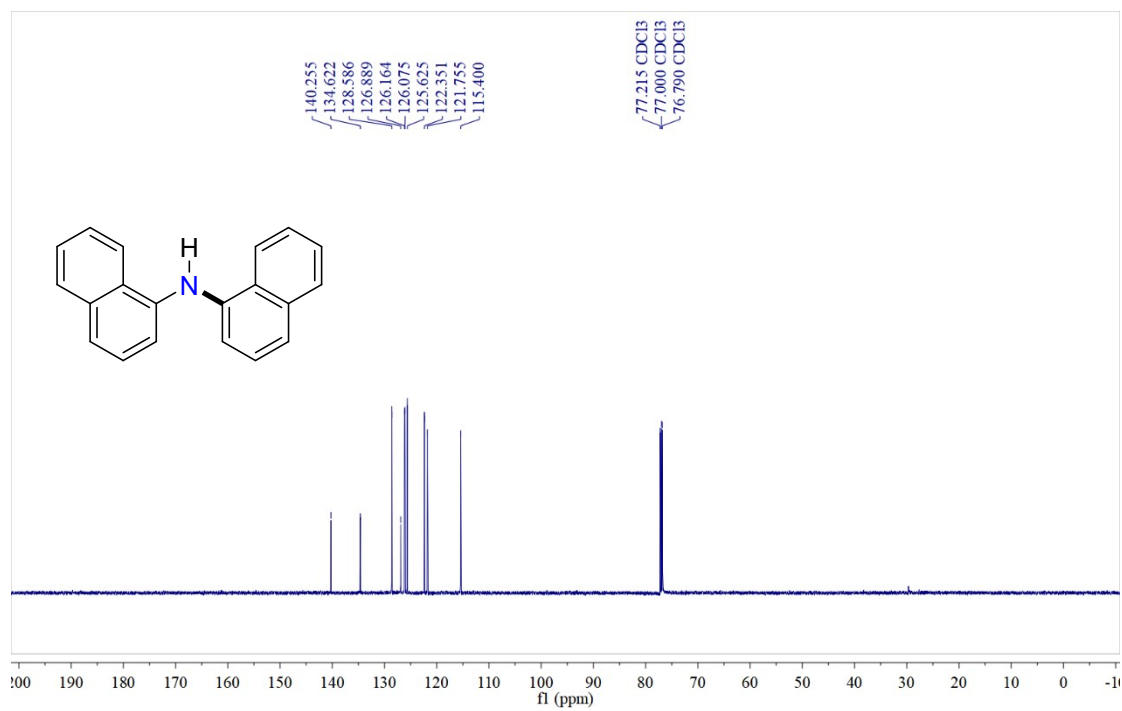

### <sup>1</sup>H NMR Spectrum of **2p**

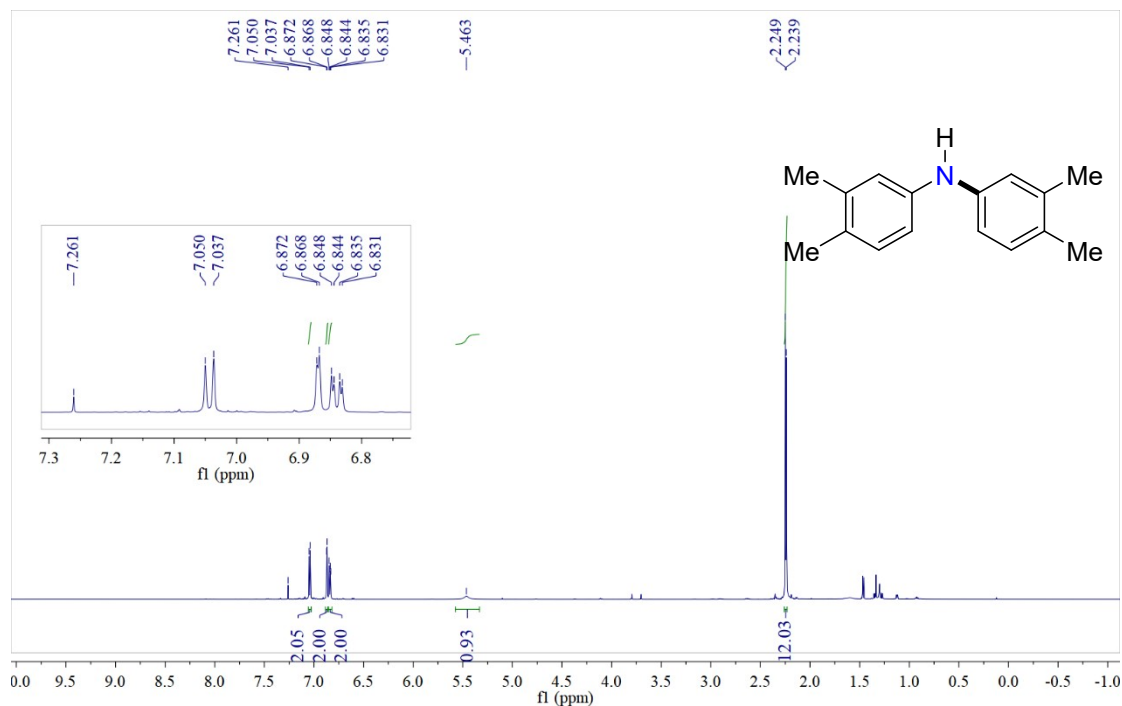

### <sup>13</sup>C NMR Spectrum of **2p**

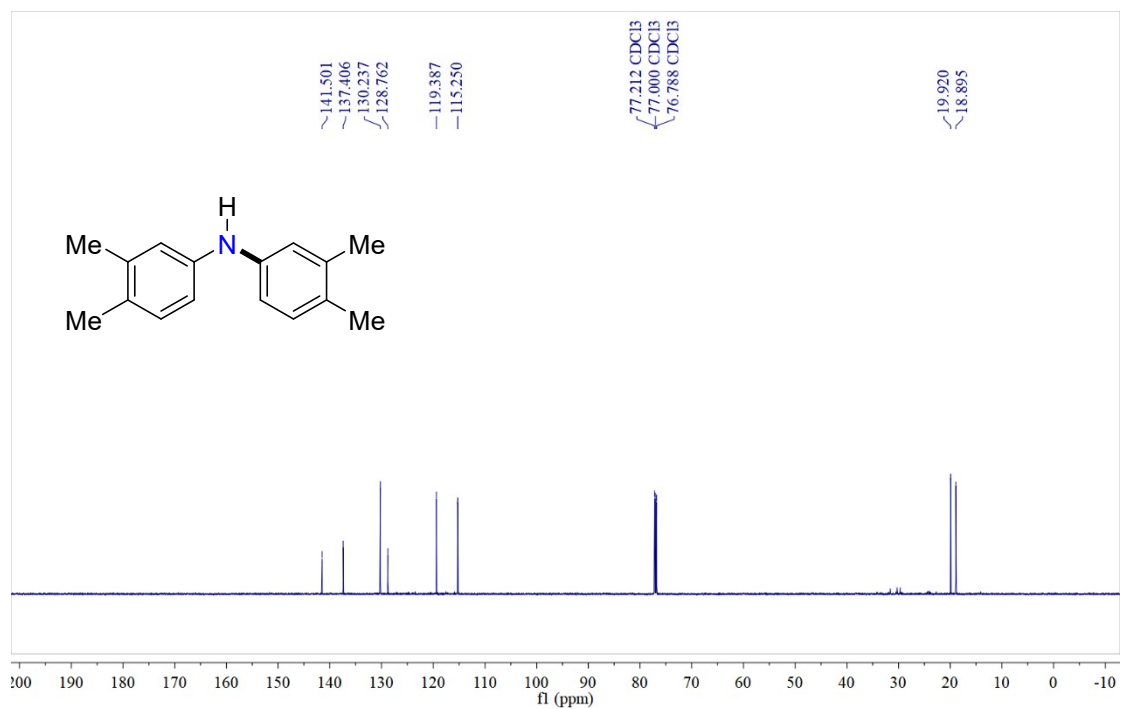

### <sup>1</sup>H NMR Spectrum of **2q**

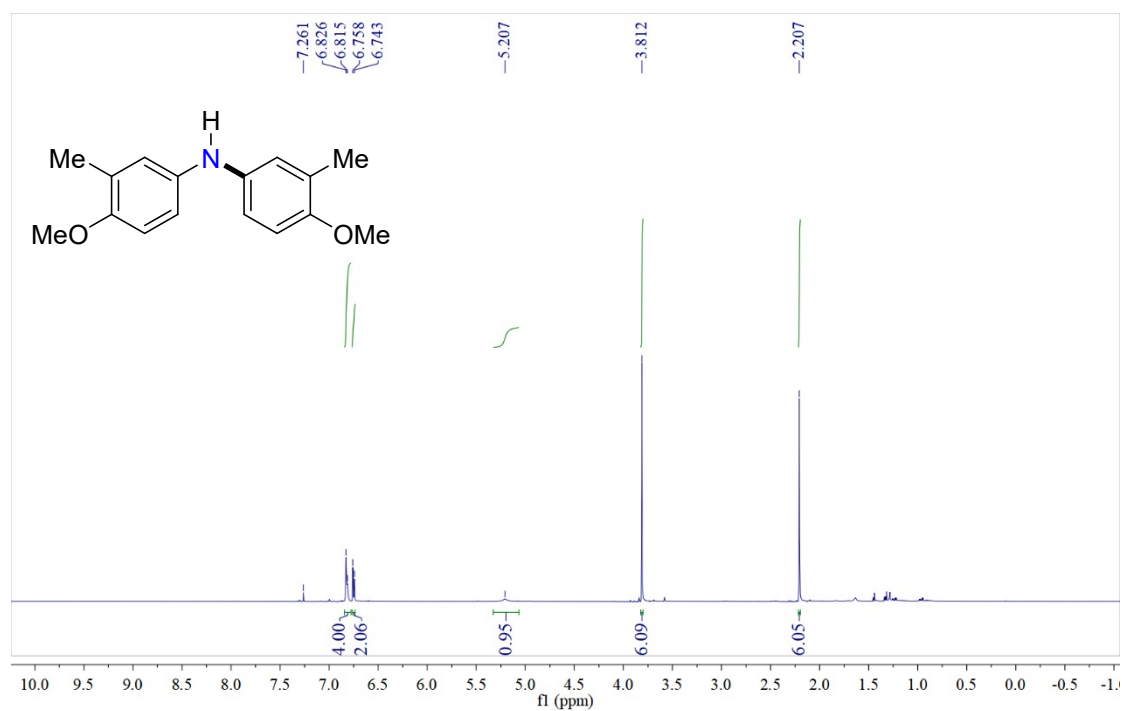

### <sup>13</sup>C NMR Spectrum of **2q**

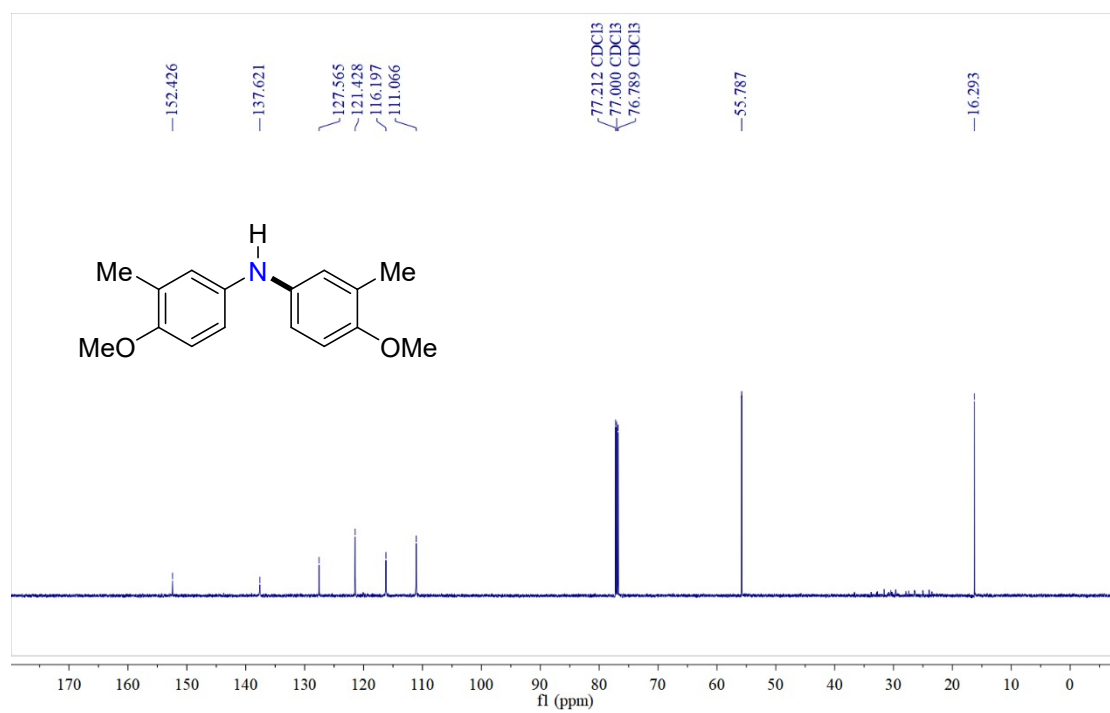

### <sup>1</sup>H NMR Spectrum of **2r**

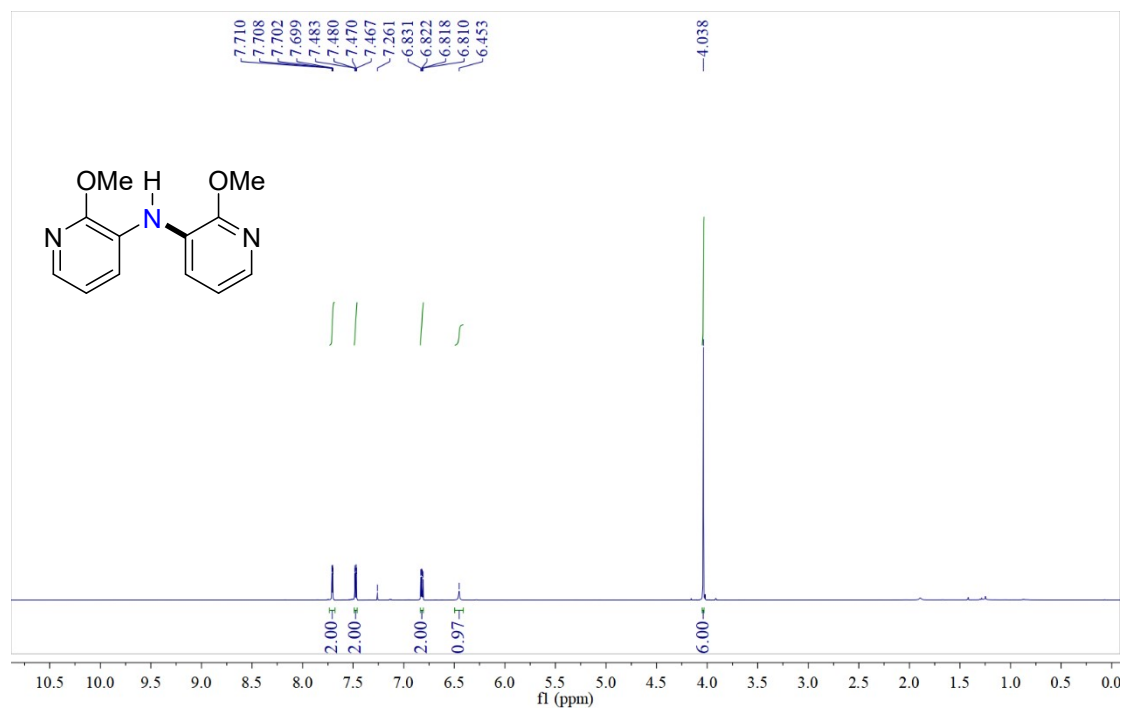

### <sup>13</sup>C NMR Spectrum of **2r**

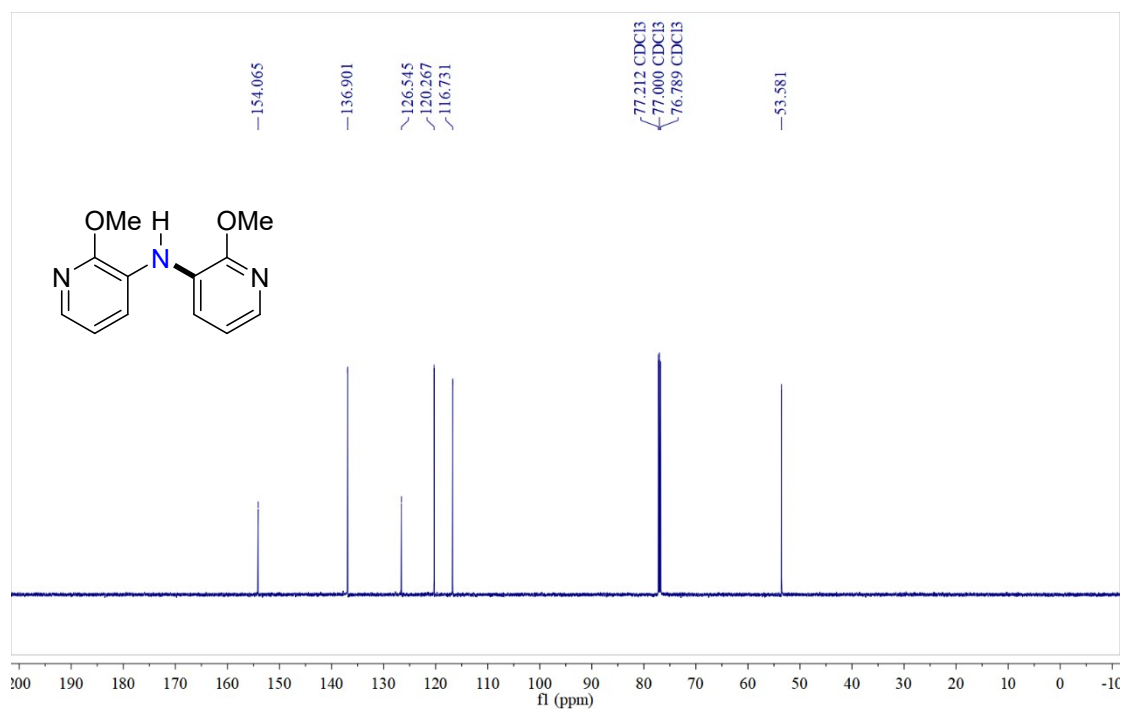

### <sup>1</sup>H NMR Spectrum of **2s**

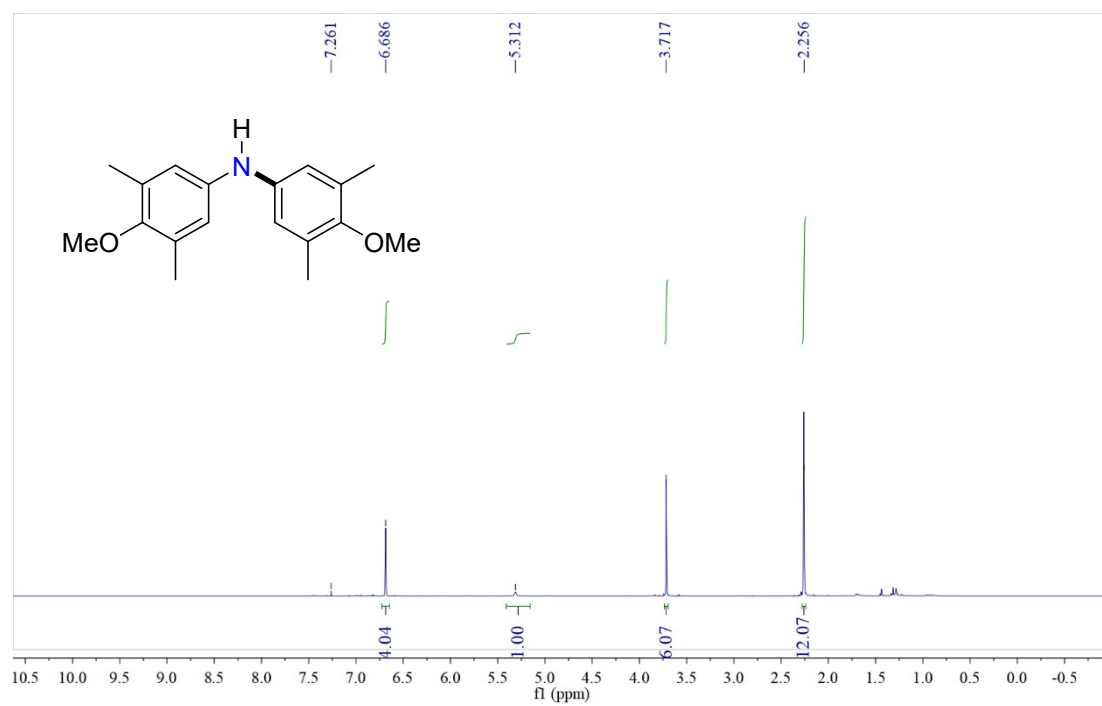

### <sup>13</sup>C NMR Spectrum of **2s**

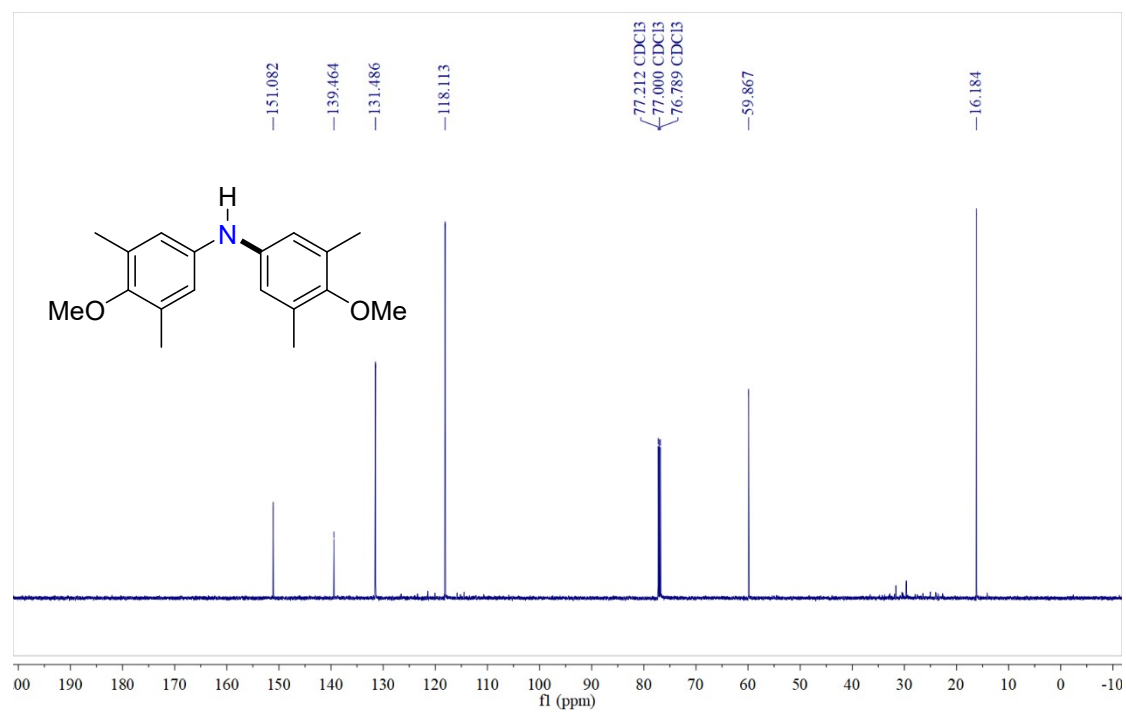

### <sup>1</sup>H NMR Spectrum of **2t**

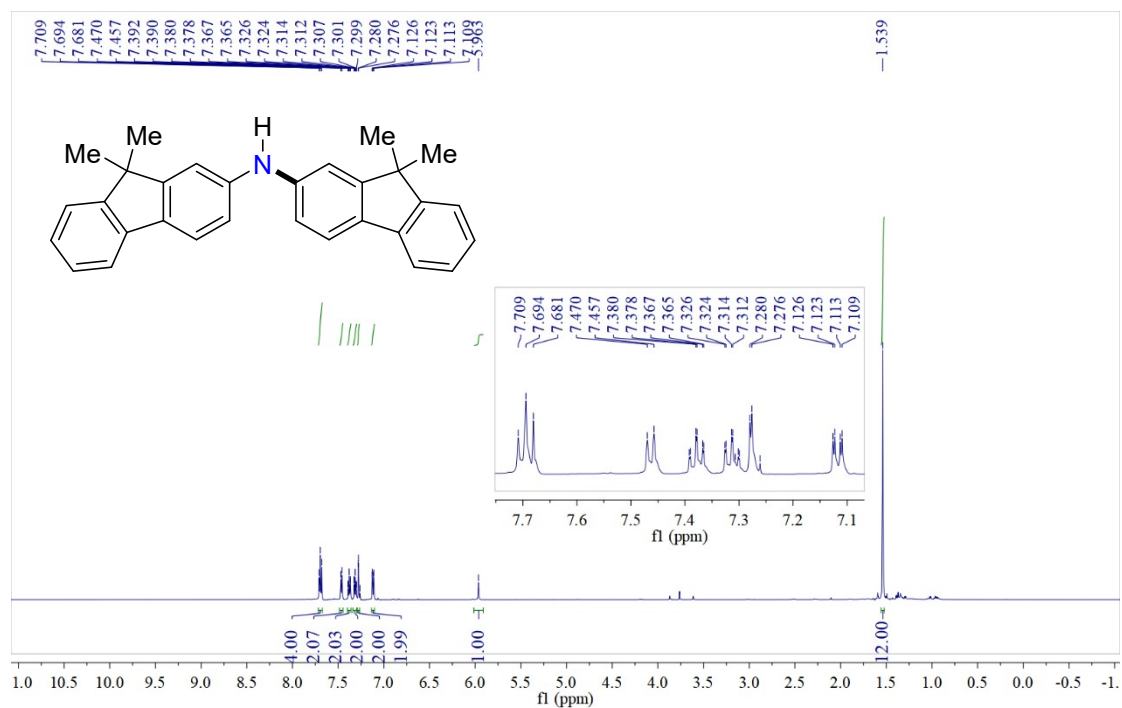

### <sup>13</sup>C NMR Spectrum of **2t**

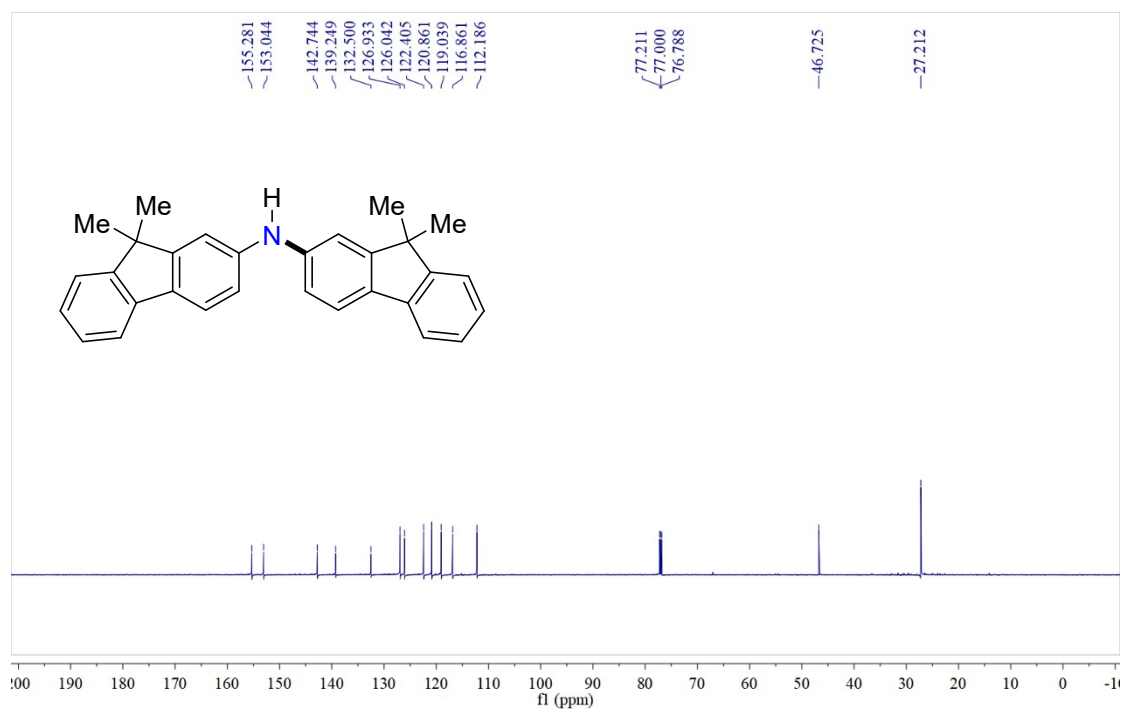



### <sup>1</sup>H NMR Spectrum of **2u**

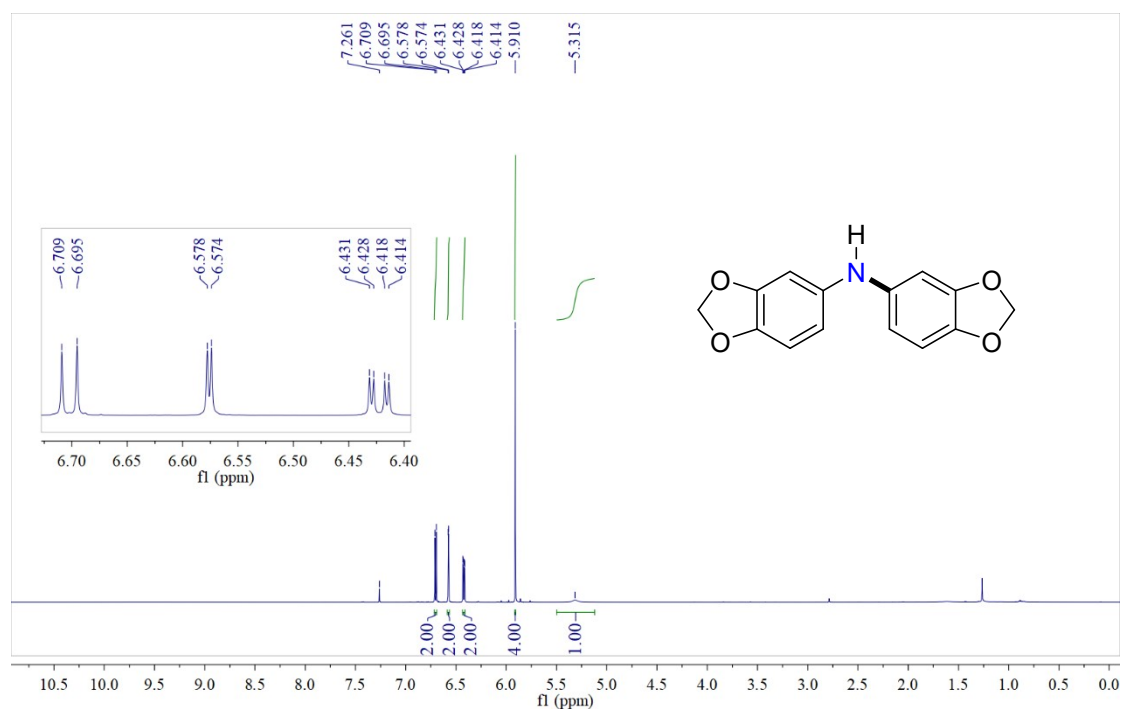

### <sup>13</sup>C NMR Spectrum of **2u**

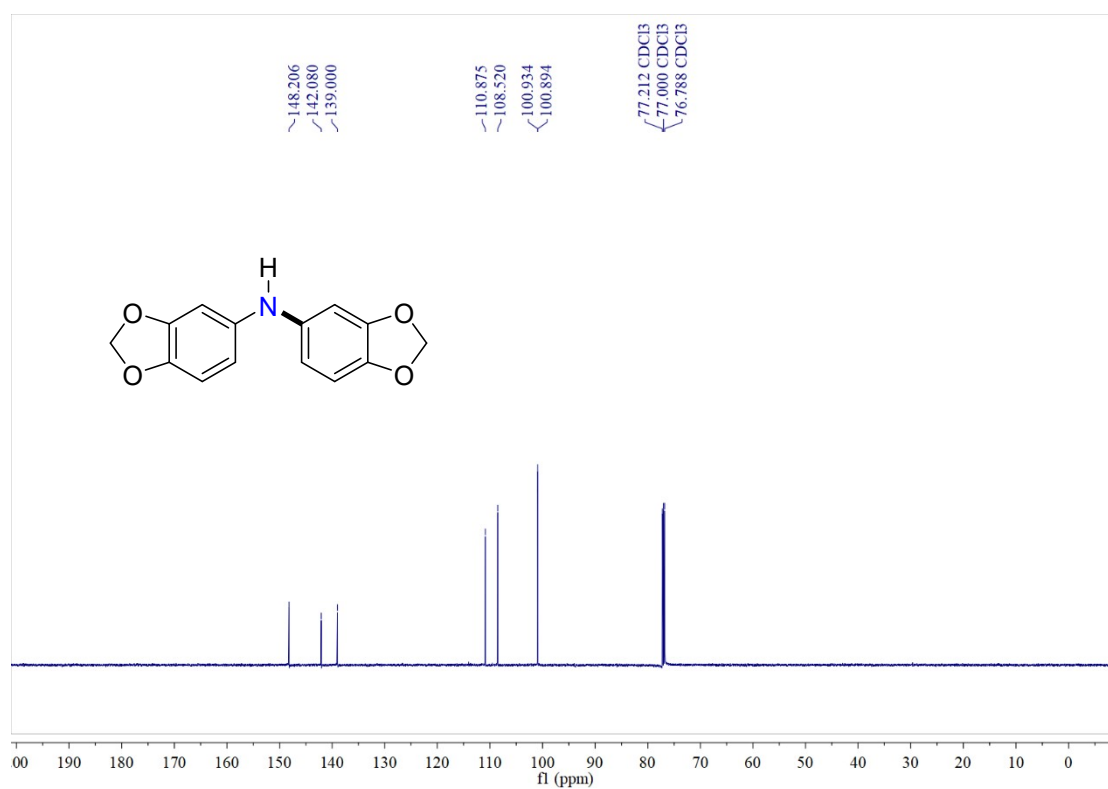

### <sup>1</sup>H NMR Spectrum of **2v**

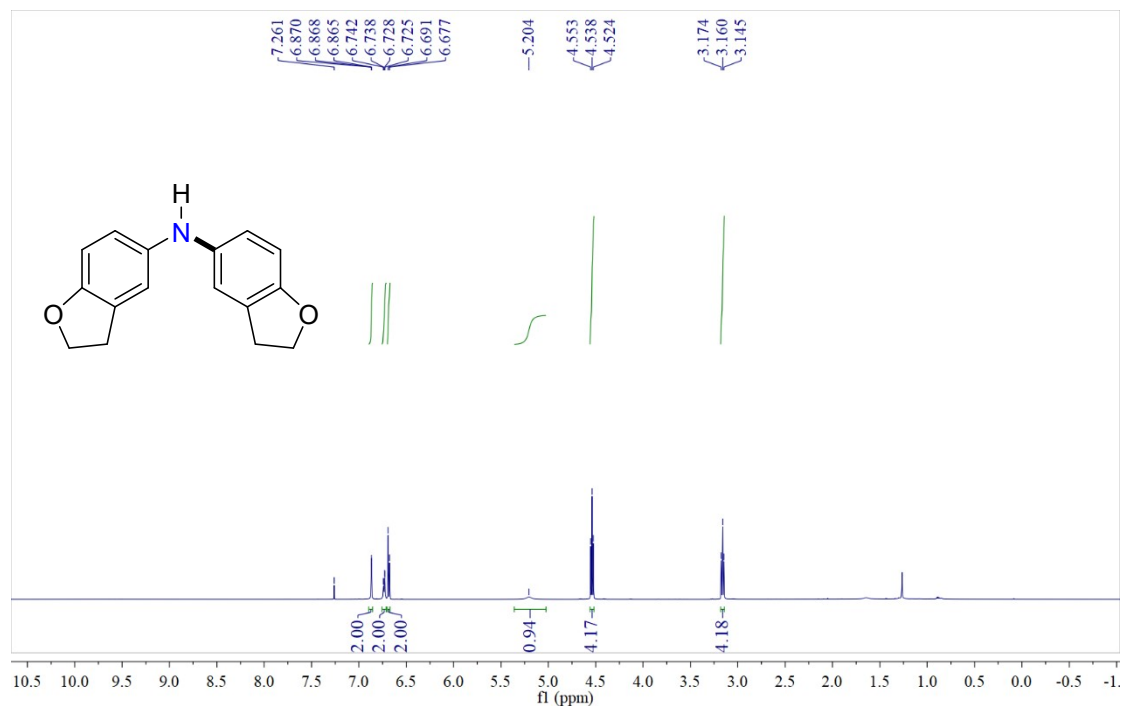

### <sup>13</sup>C NMR Spectrum of **2v**

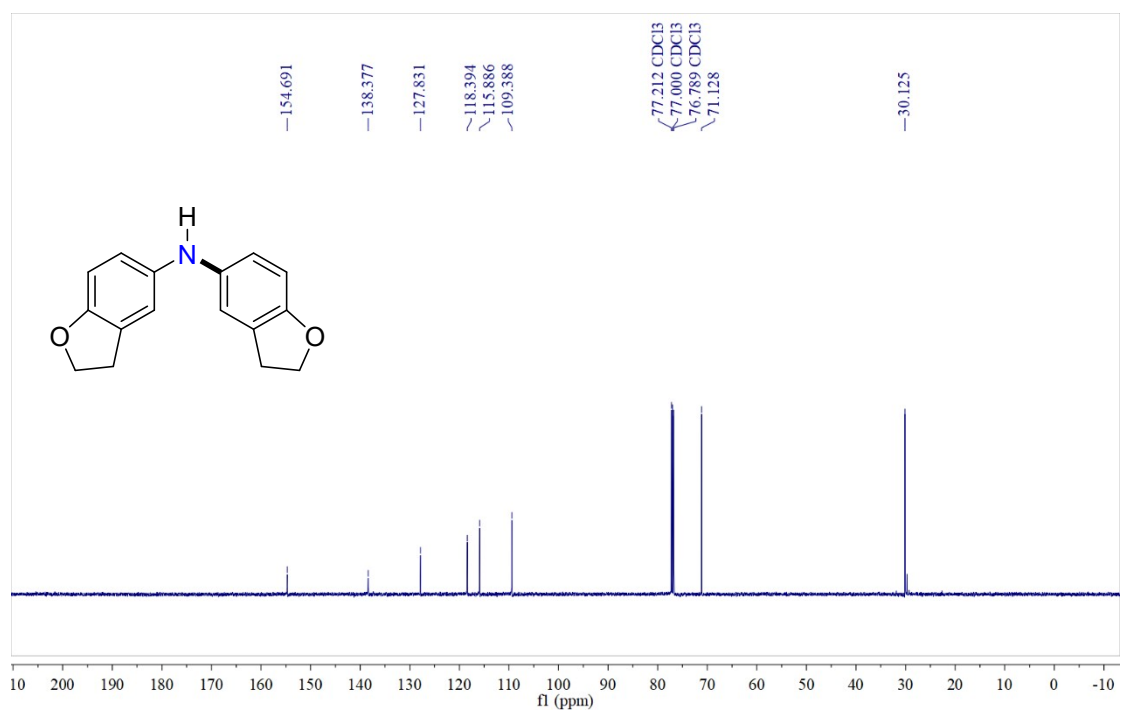

### <sup>1</sup>H NMR Spectrum of **2w**

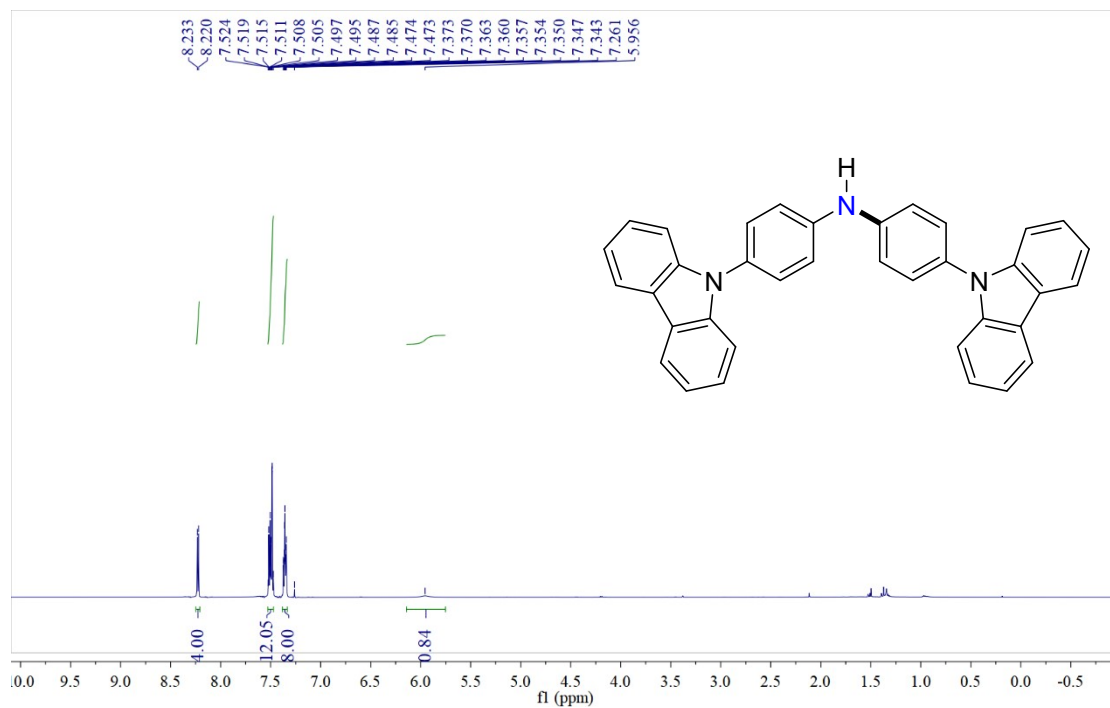

### <sup>13</sup>C NMR Spectrum of **2w**

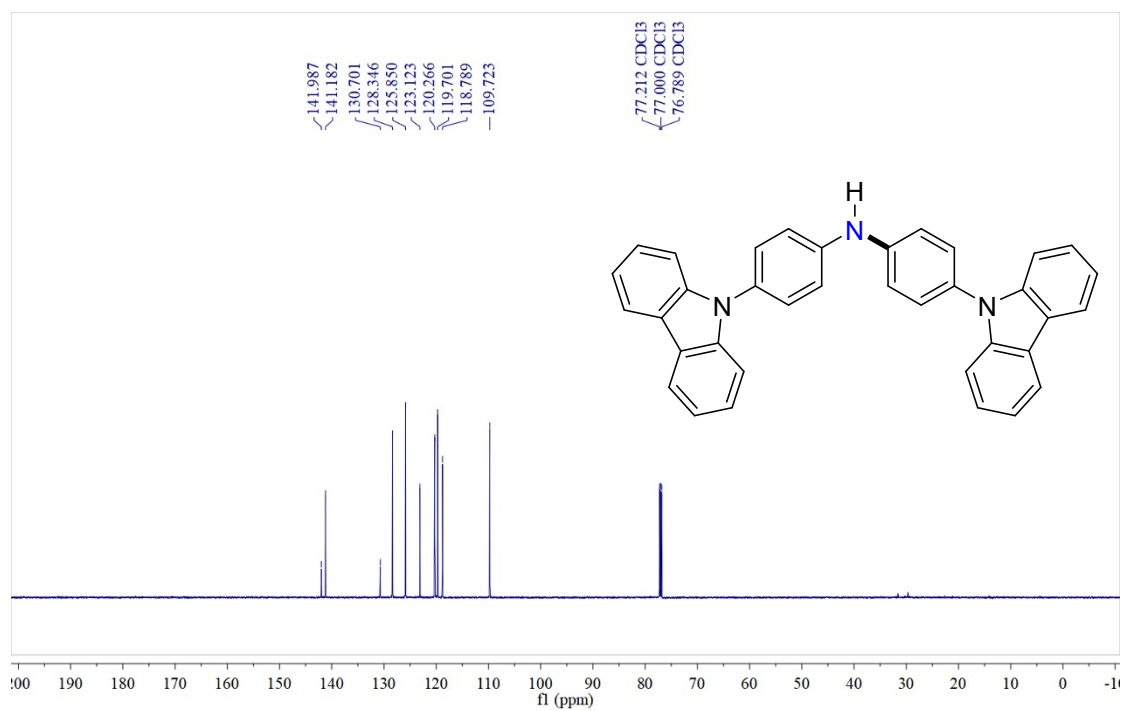

### <sup>1</sup>H NMR Spectrum of **2x**

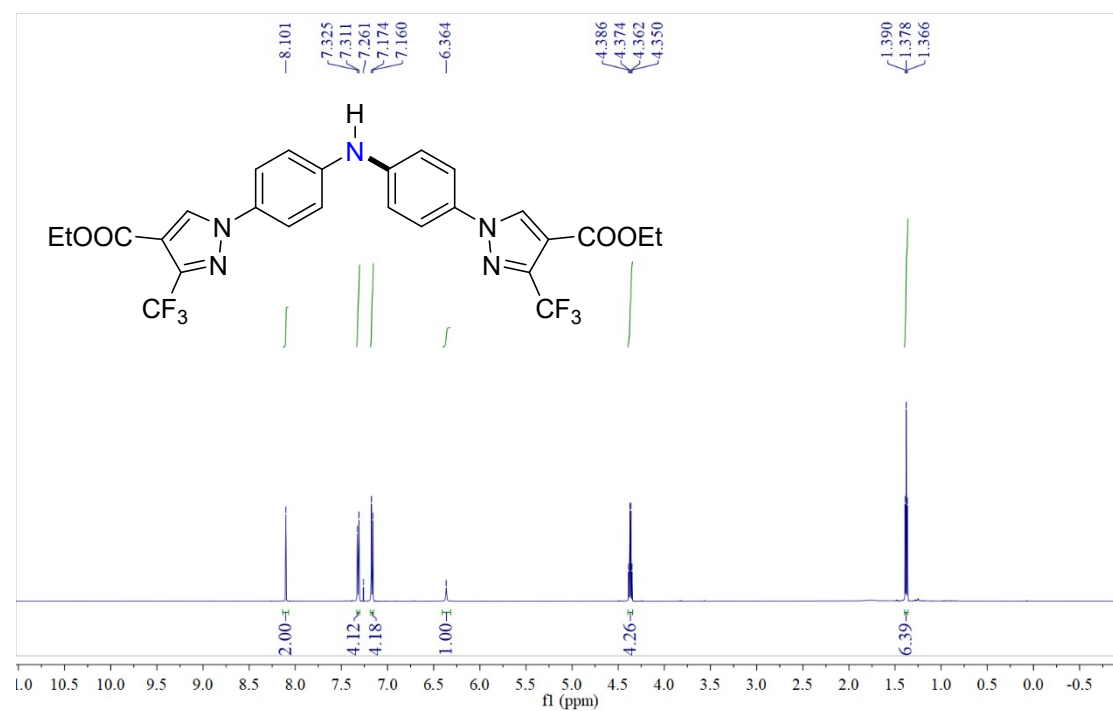

### <sup>13</sup>C NMR Spectrum of **2x**

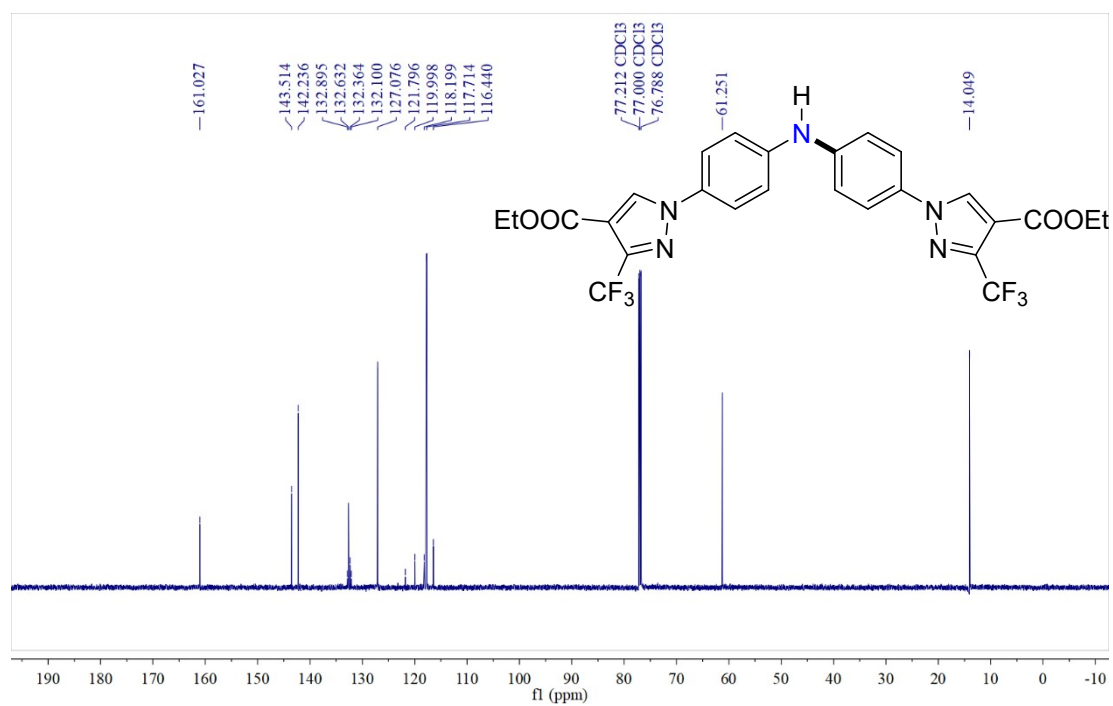

### <sup>19</sup>F NMR Spectrum of **2x**

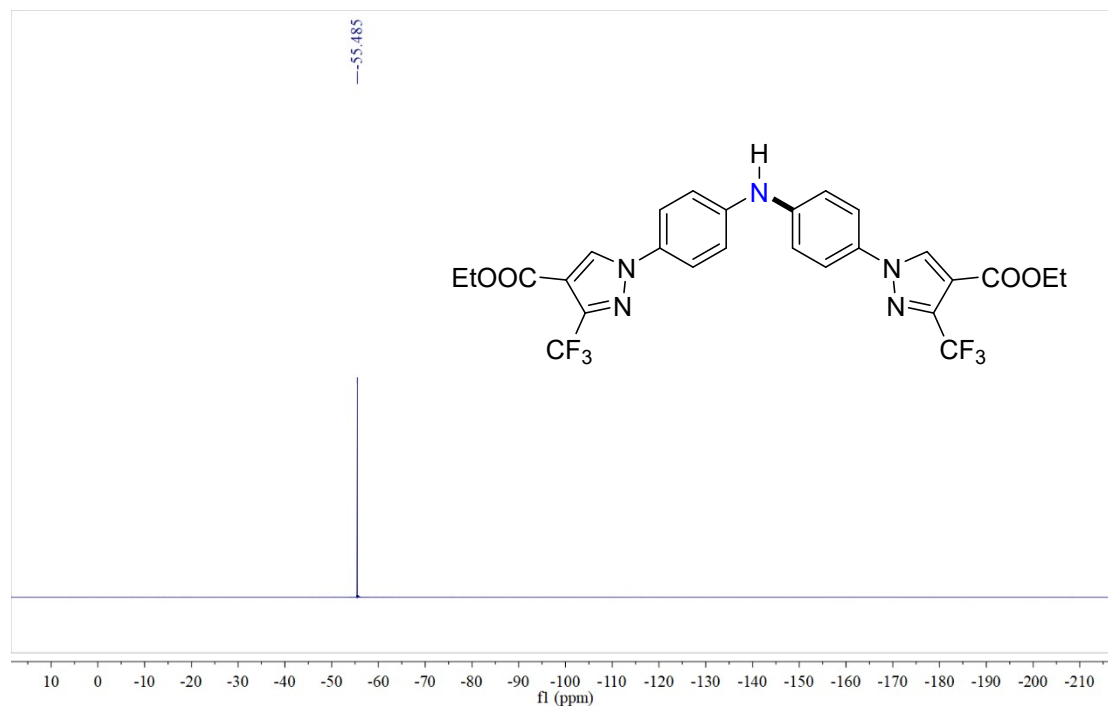

### <sup>1</sup>H NMR Spectrum of **2y**

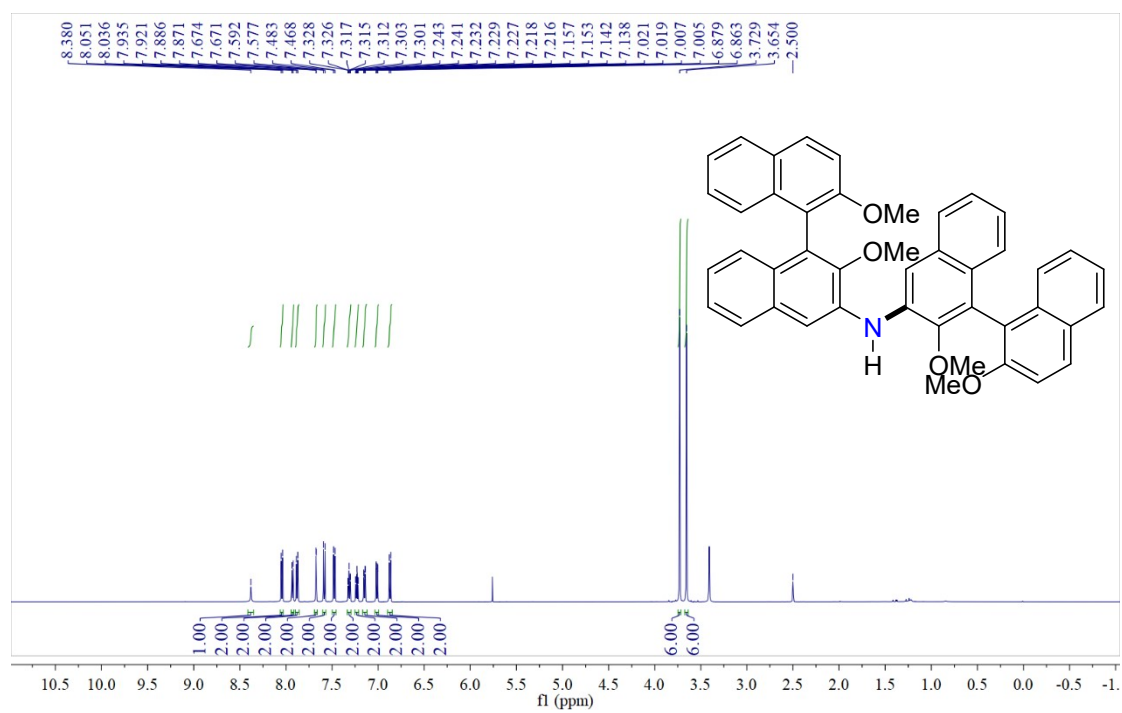

### <sup>13</sup>C NMR Spectrum of **2y**

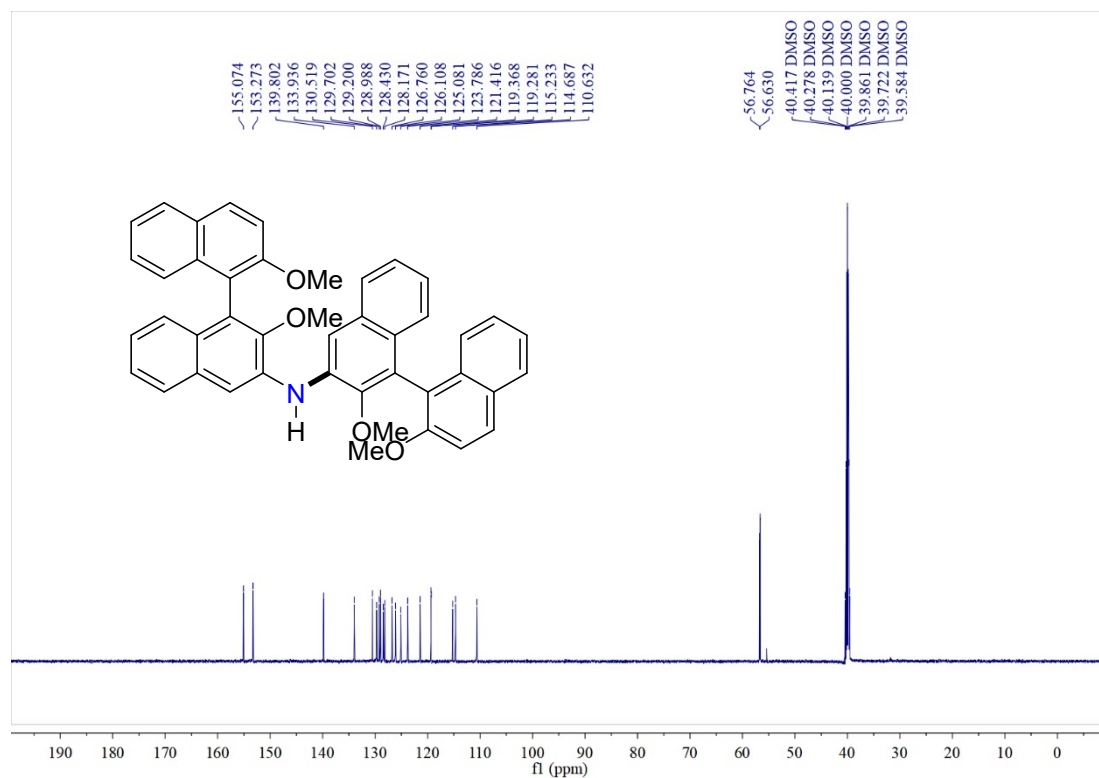

### <sup>1</sup>H NMR Spectrum of **3a**

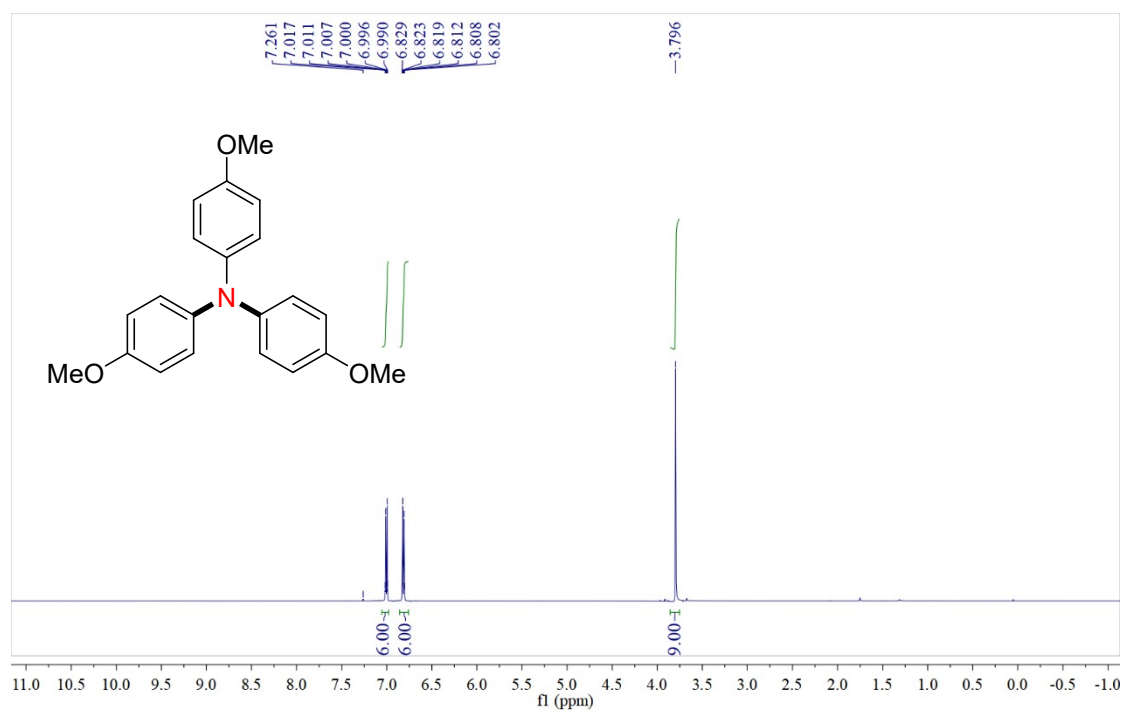

### <sup>13</sup>C NMR Spectrum of **3a**

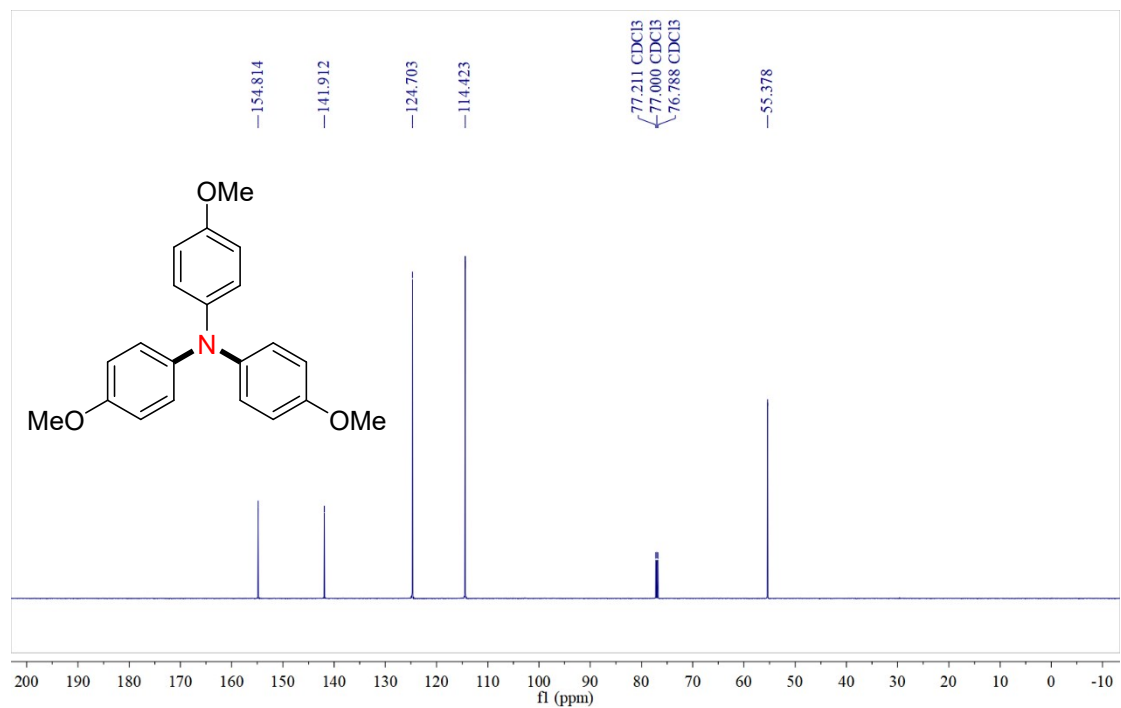

### <sup>1</sup>H NMR Spectrum of **3b**

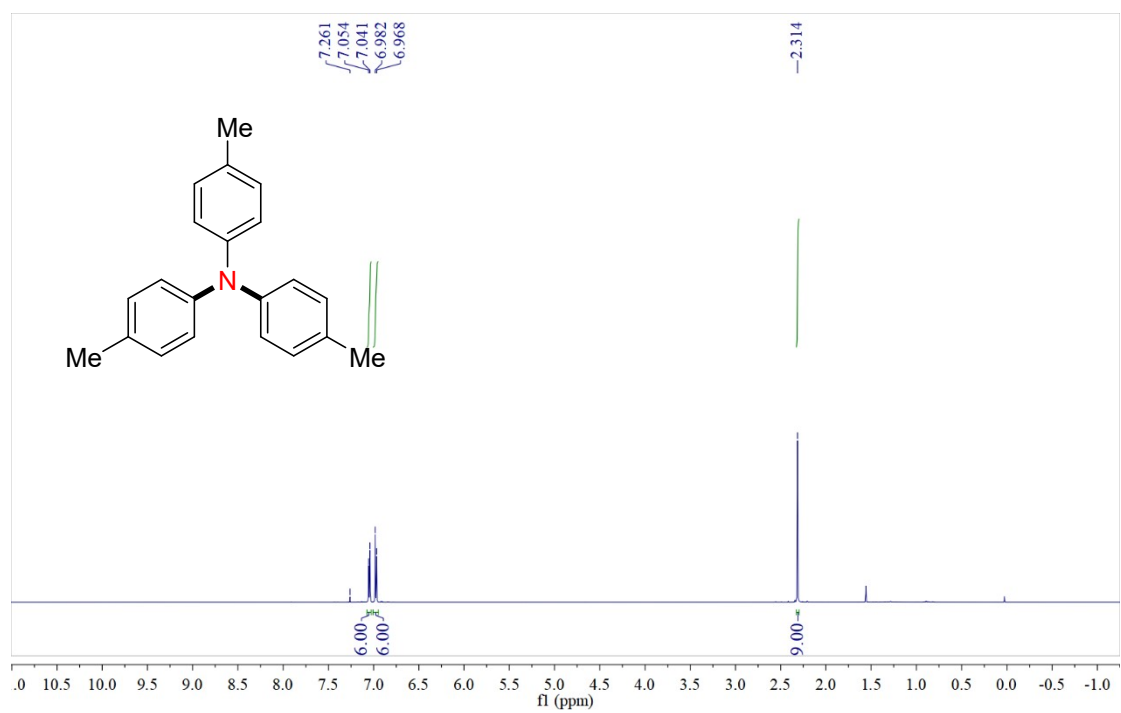

### $^{13}\text{C}$ NMR Spectrum of **3b**

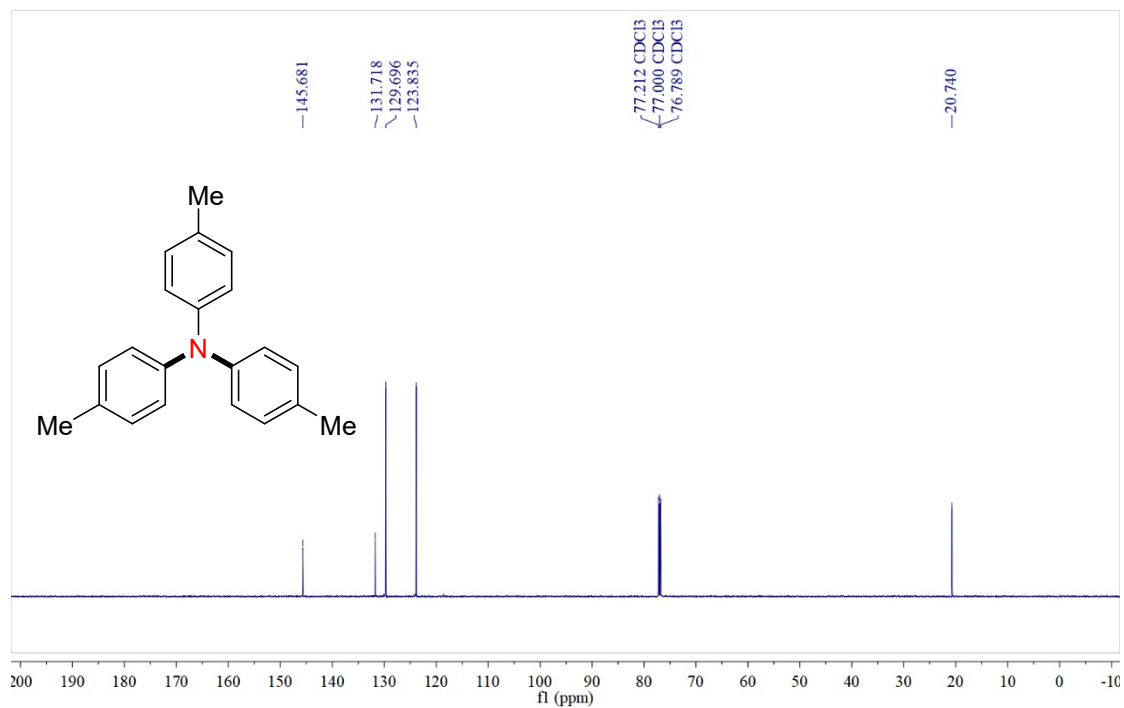

### $^1\text{H}$ NMR Spectrum of **3c**

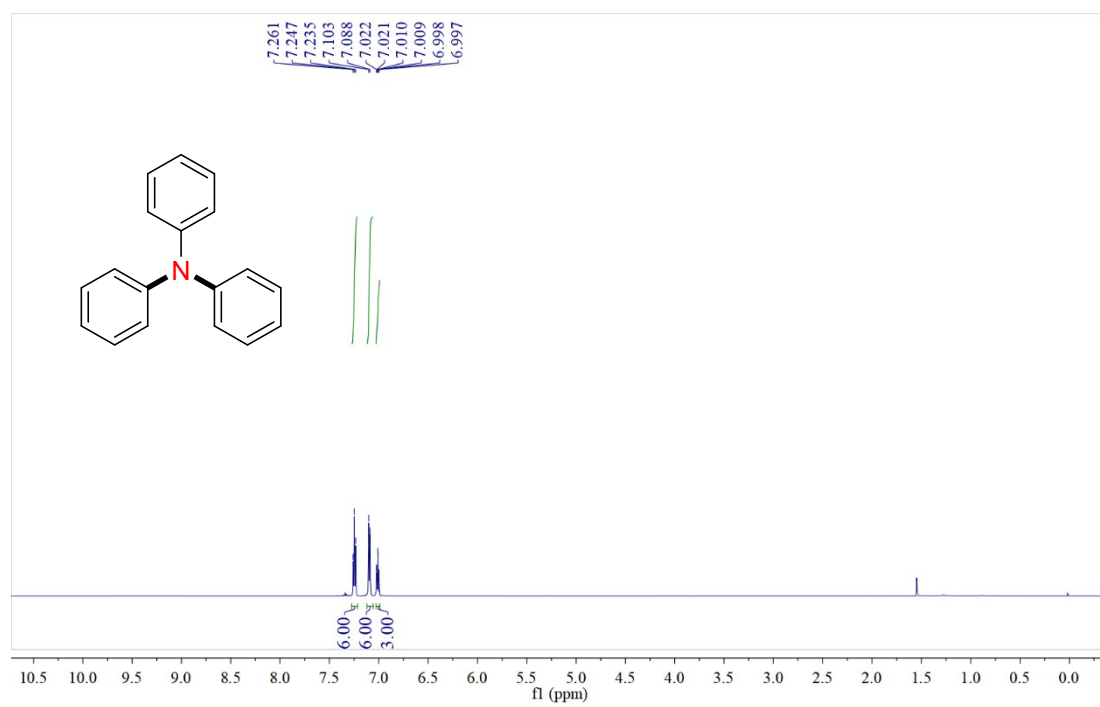



### <sup>13</sup>C NMR Spectrum of **3c**

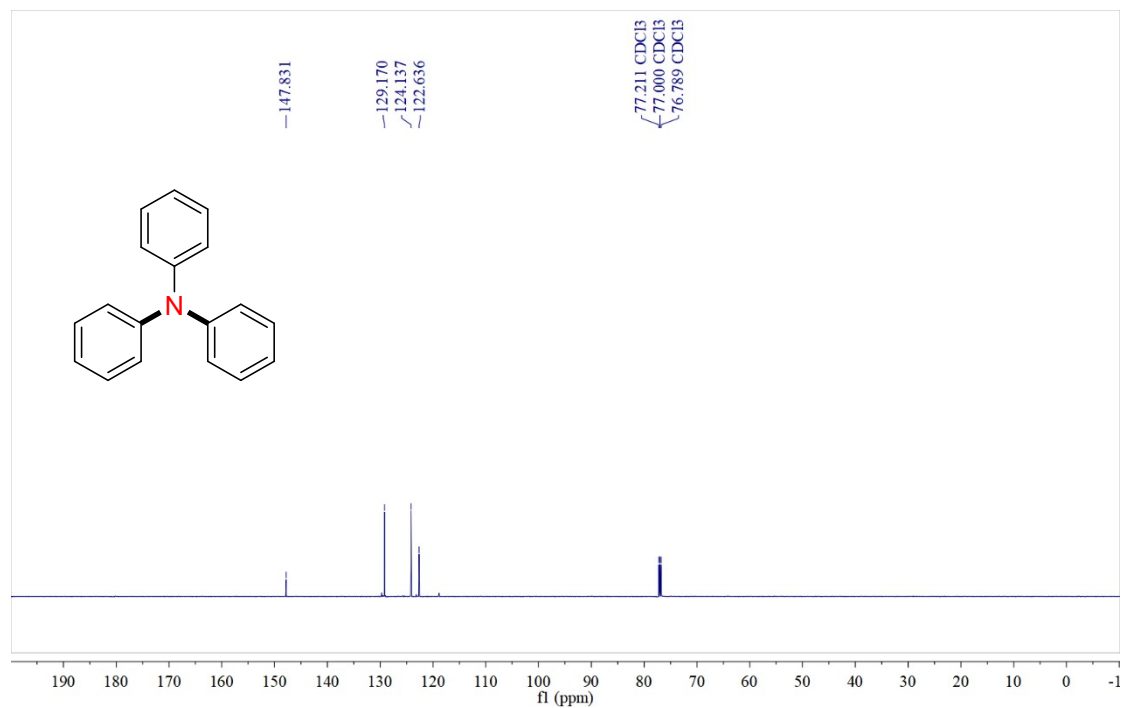

### <sup>1</sup>H NMR Spectrum of **3d**

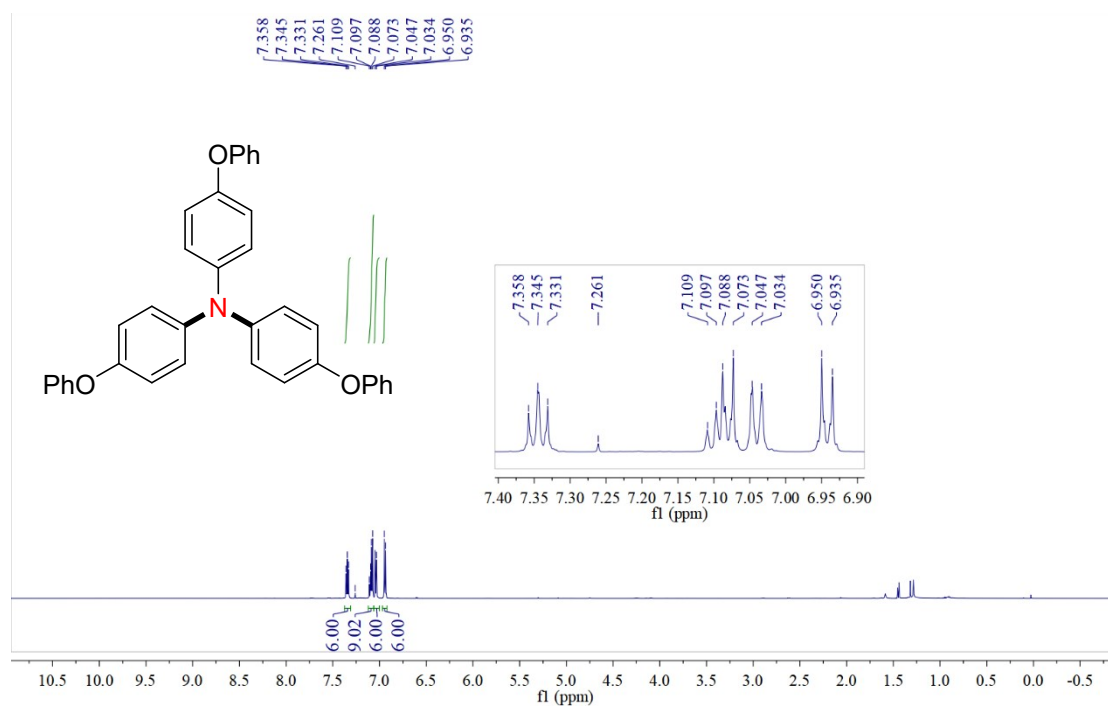

### <sup>13</sup>C NMR Spectrum of **3d**

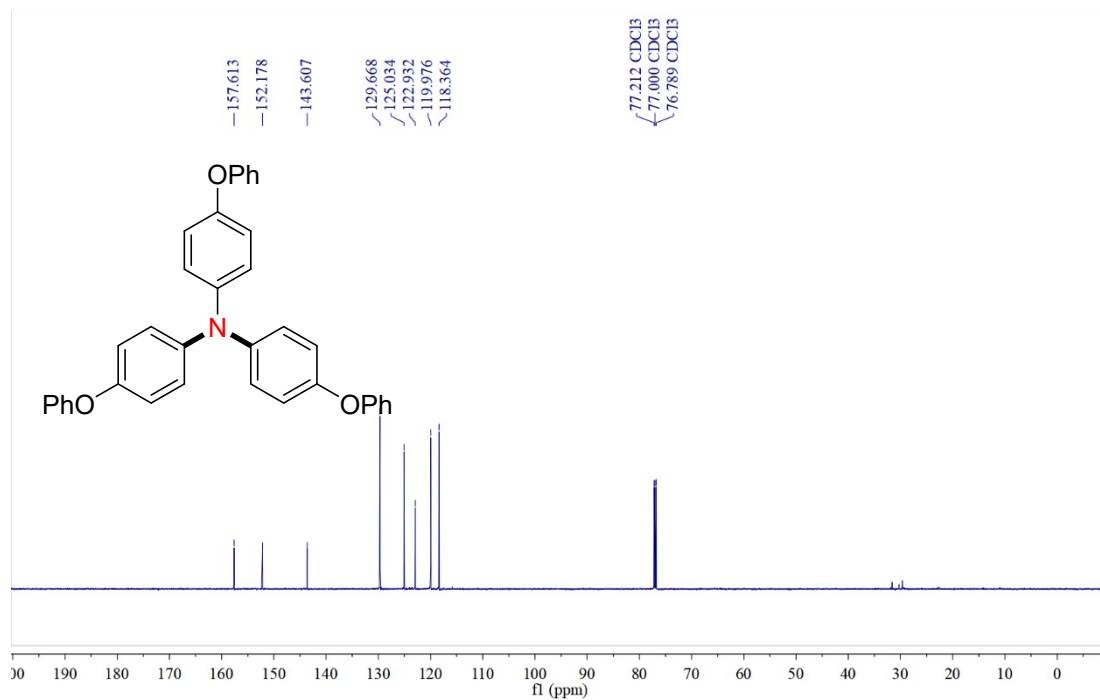

### <sup>1</sup>H NMR Spectrum of **3e**

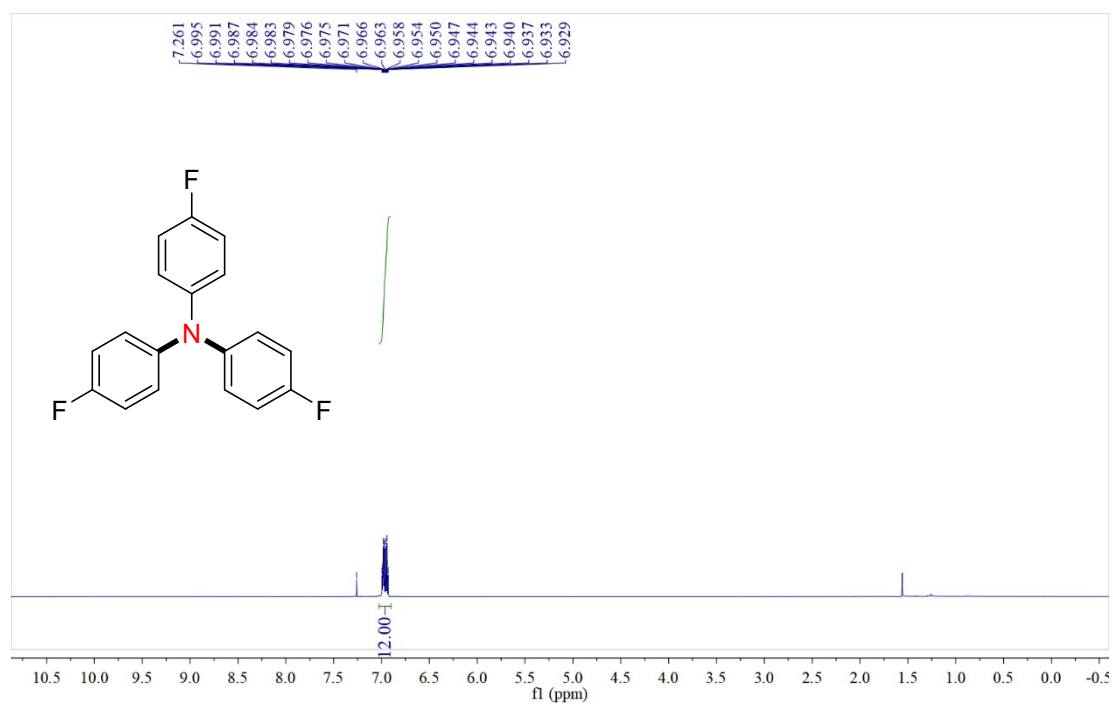

### <sup>13</sup>C NMR Spectrum of **3e**

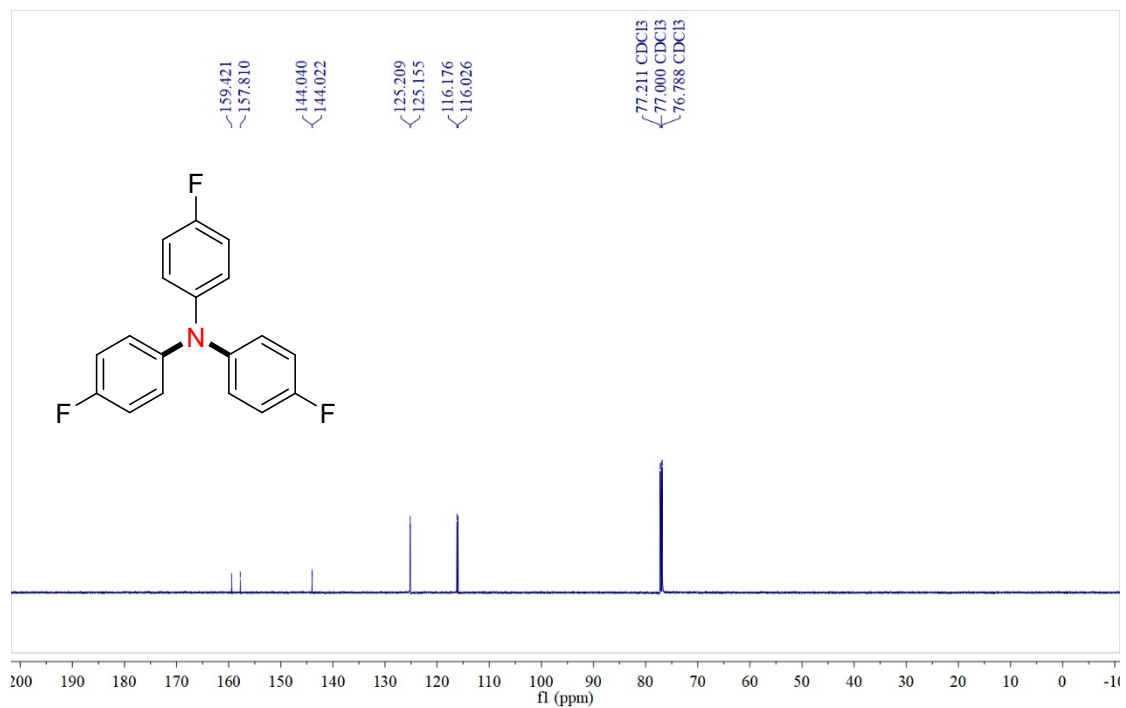

### <sup>19</sup>F NMR Spectrum of **3e**

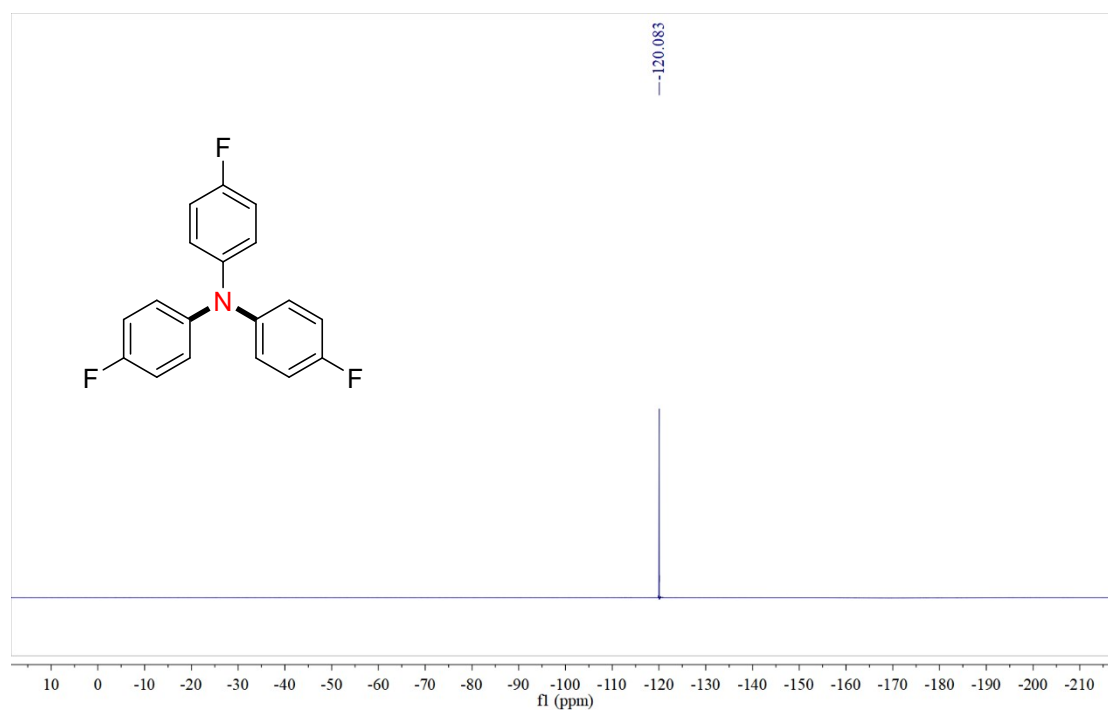

### $^1\text{H}$ NMR Spectrum of **3f**

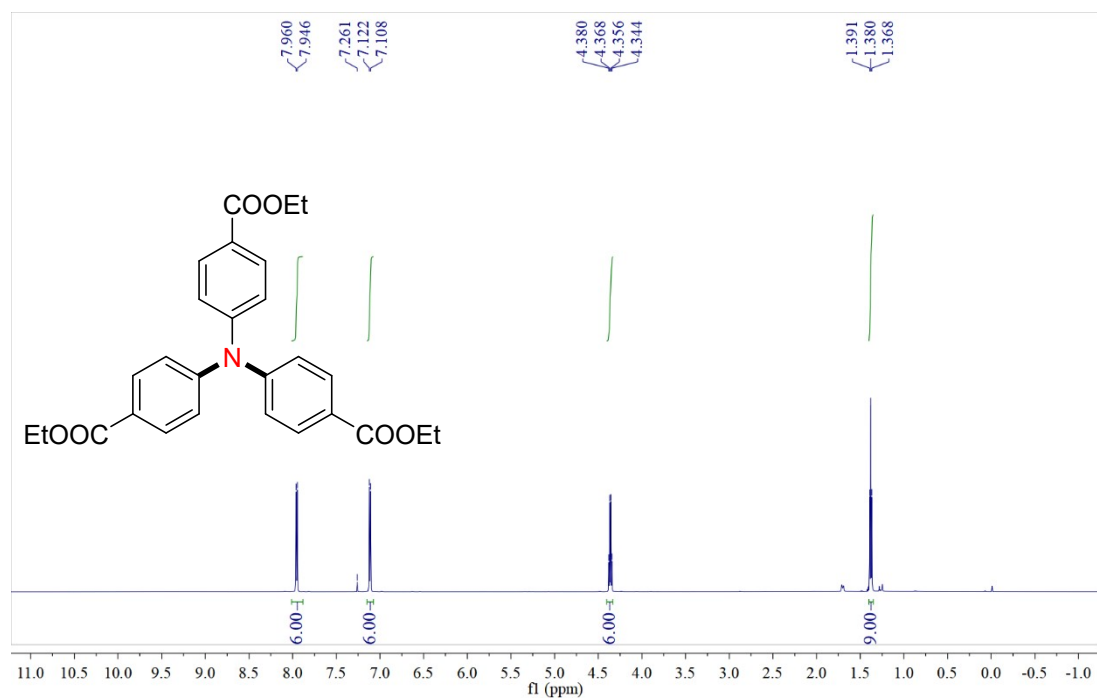

### $^{13}\text{C}$ NMR Spectrum of **3f**

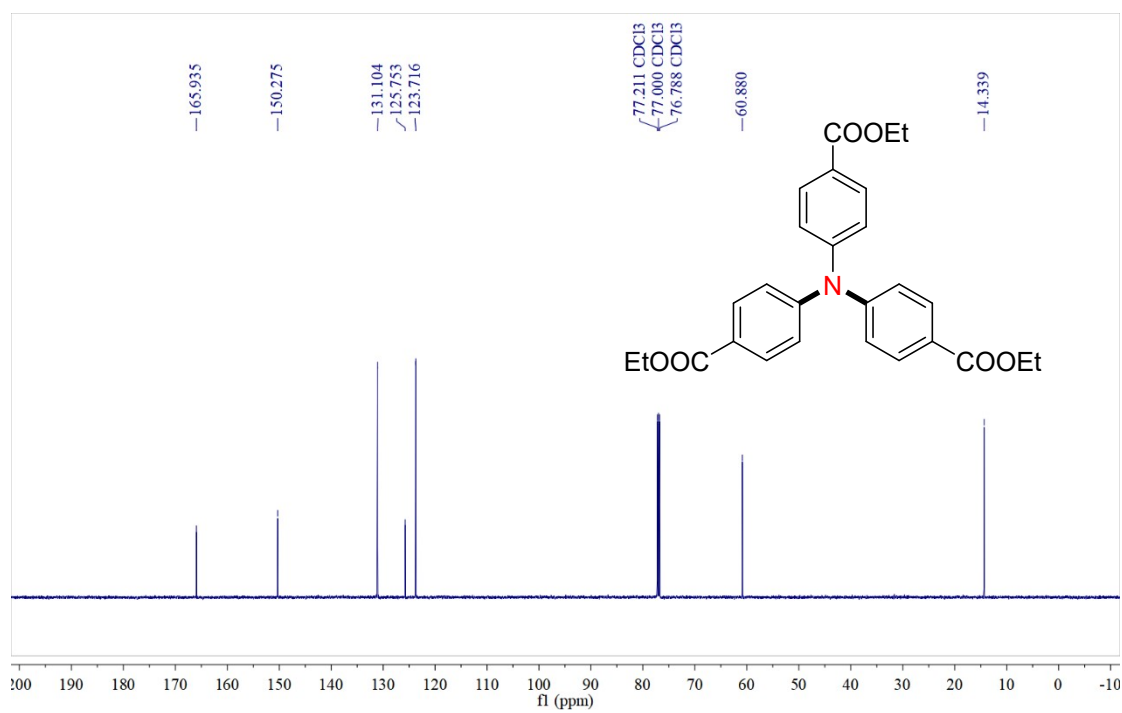

### <sup>1</sup>H NMR Spectrum of **3g**

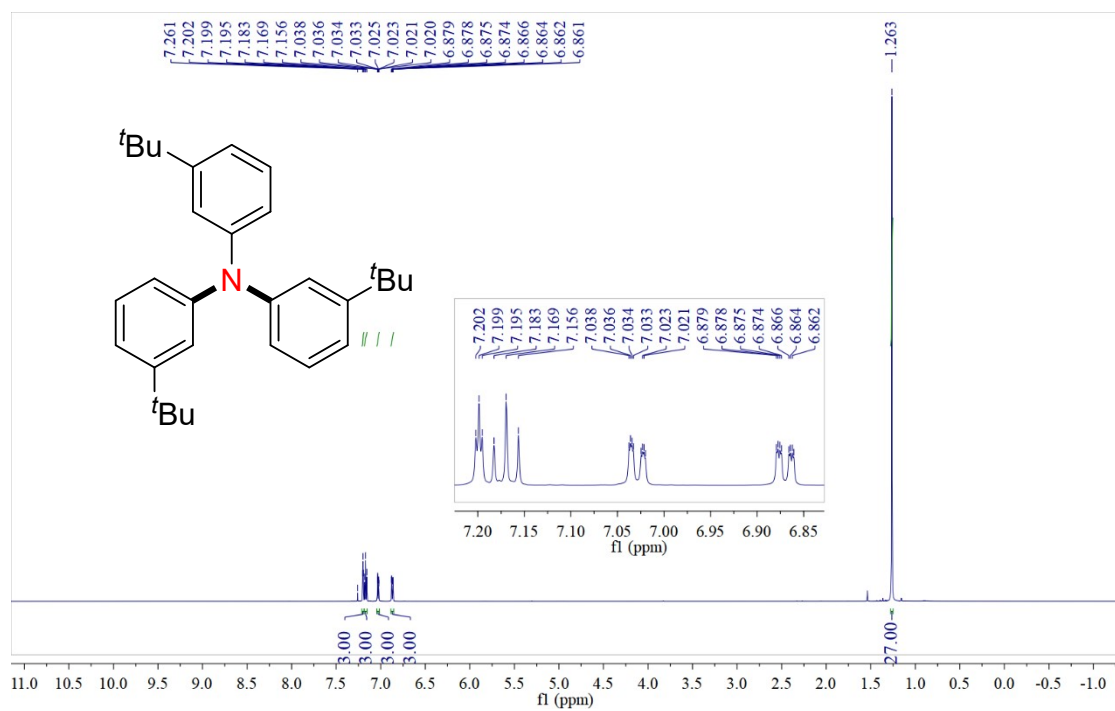

### <sup>13</sup>C NMR Spectrum of **3g**

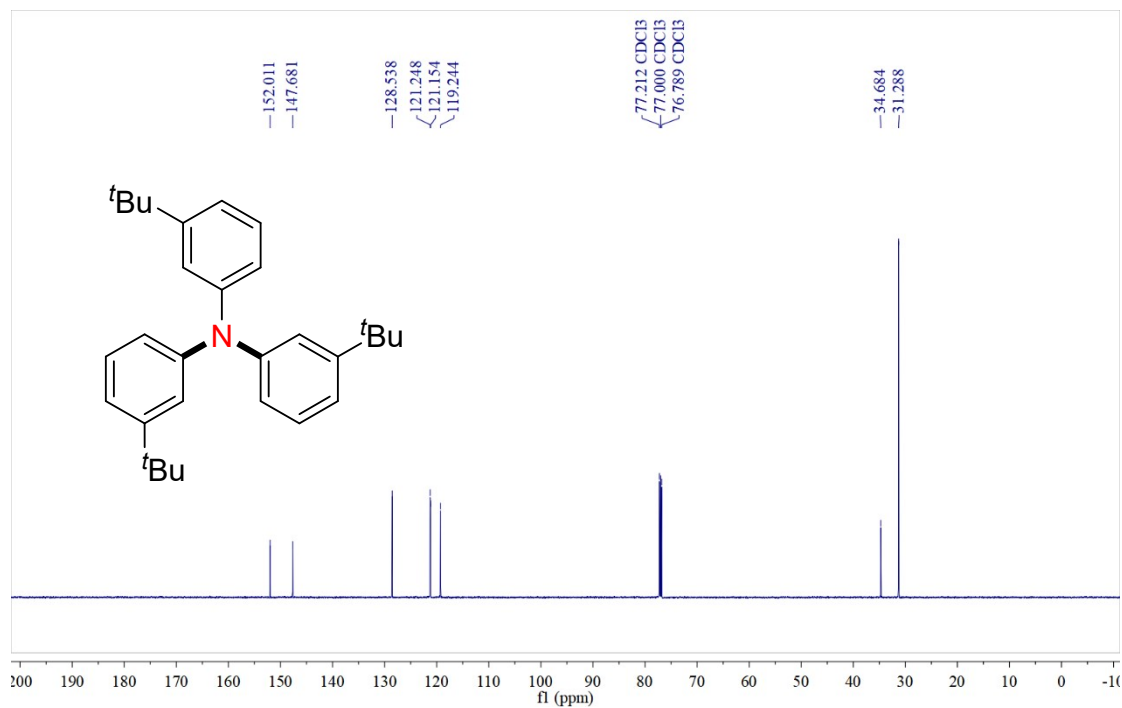

### <sup>1</sup>H NMR Spectrum of **3h**

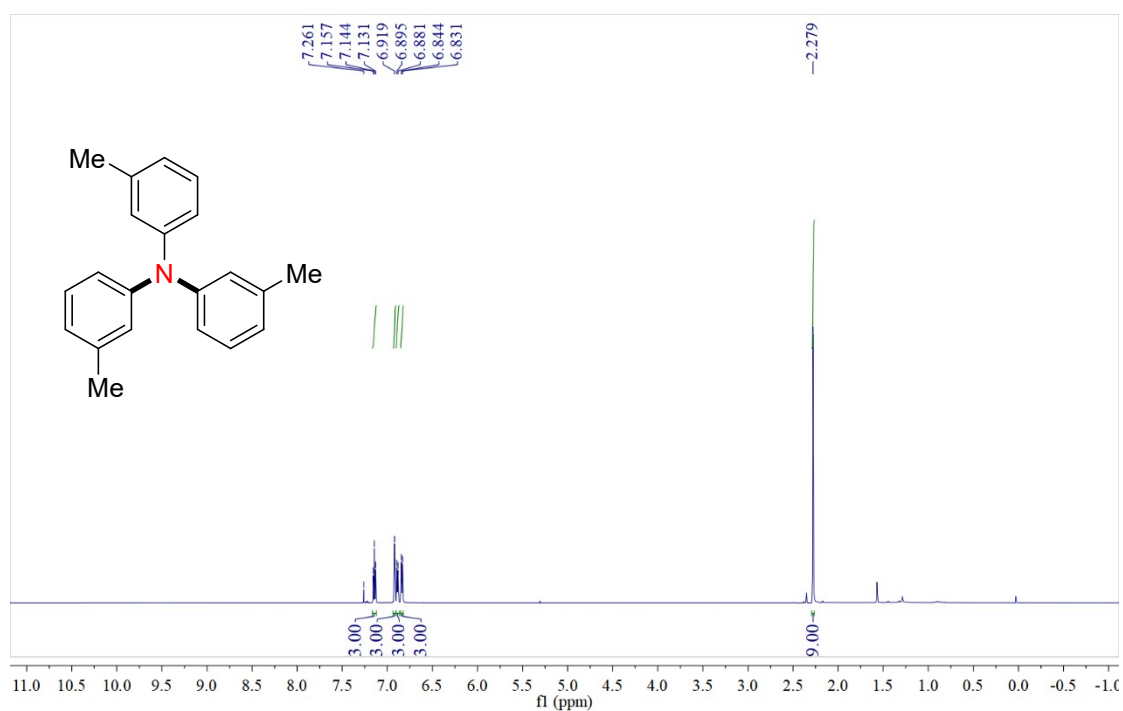

### <sup>13</sup>C NMR Spectrum of **3h**

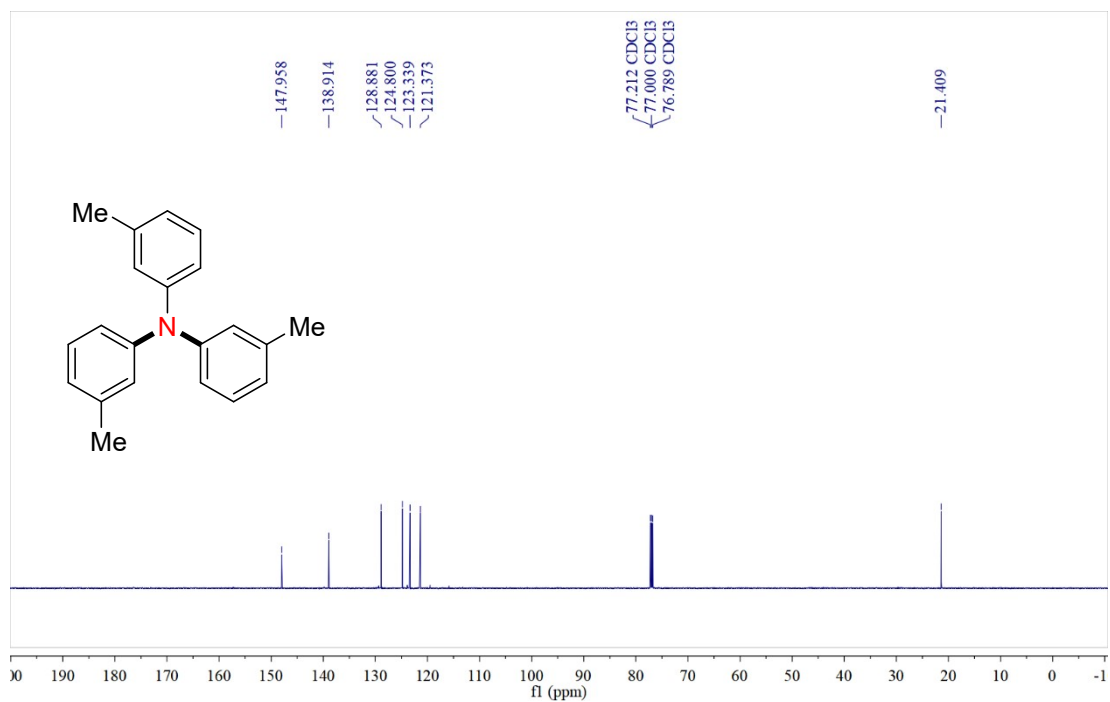

### <sup>1</sup>H NMR Spectrum of **3i**

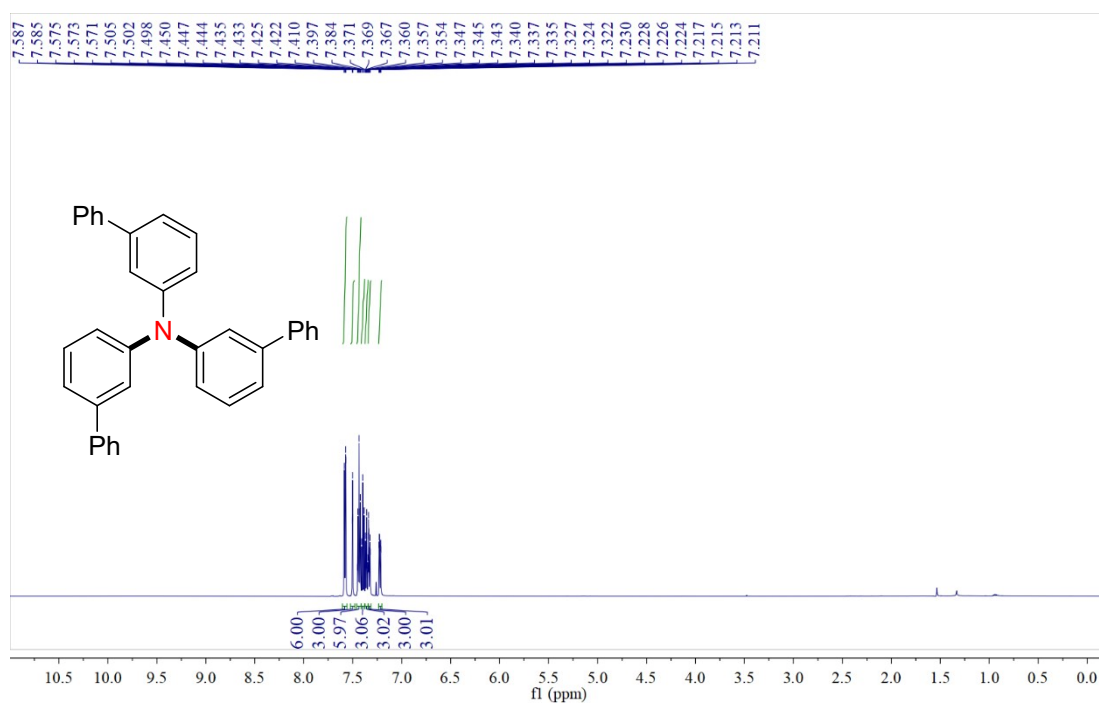

### <sup>13</sup>C NMR Spectrum of **3i**

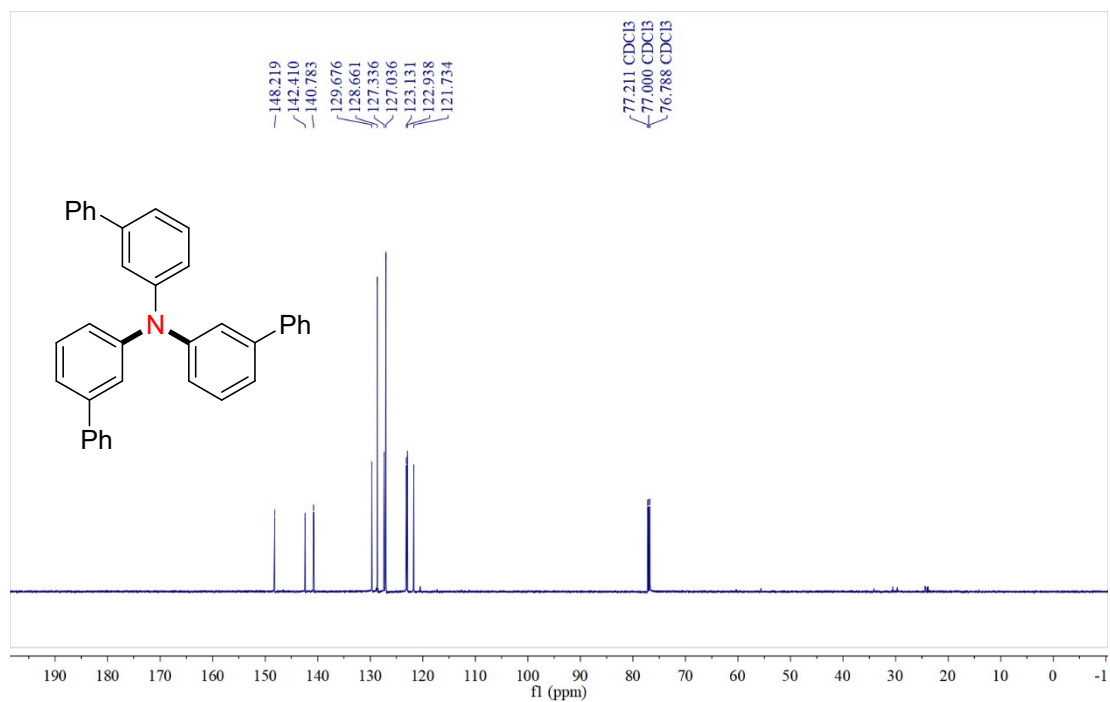

### <sup>1</sup>H NMR Spectrum of **3j**

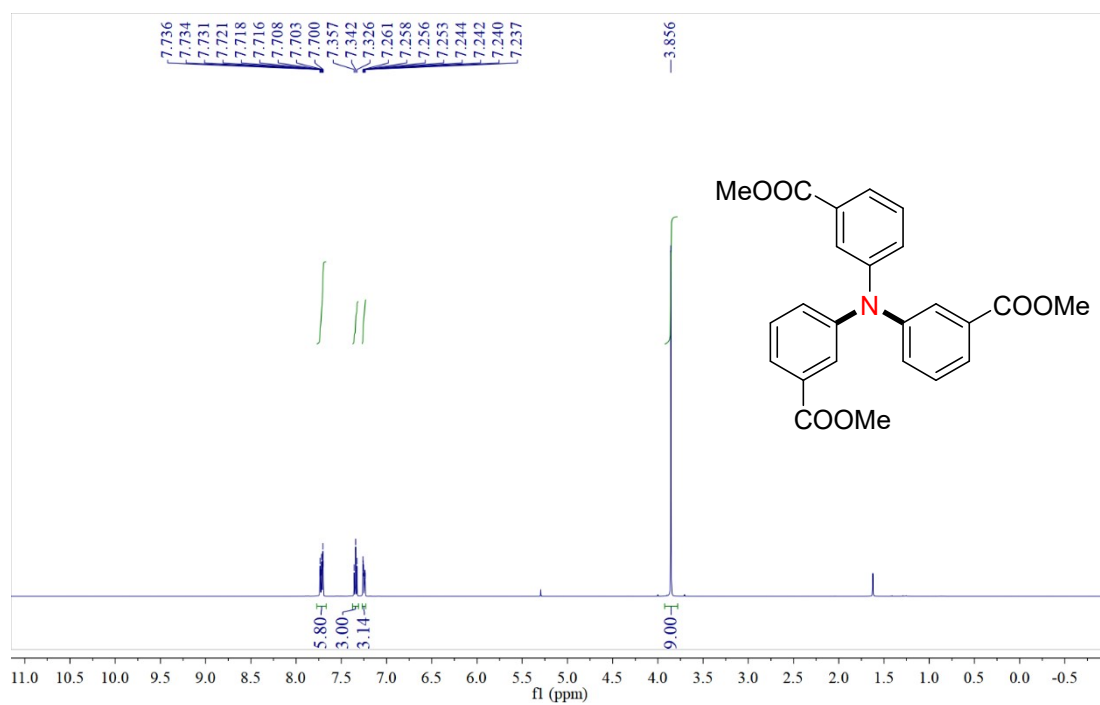

### <sup>13</sup>C NMR Spectrum of **3j**

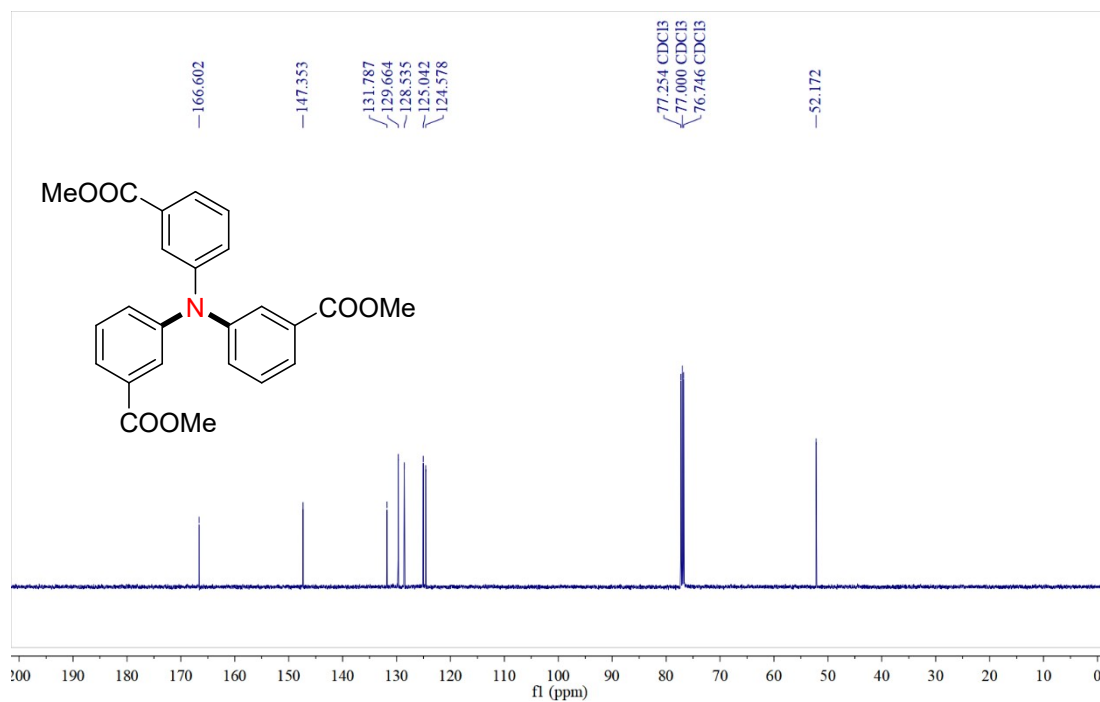



### <sup>1</sup>H NMR Spectrum of **3k**

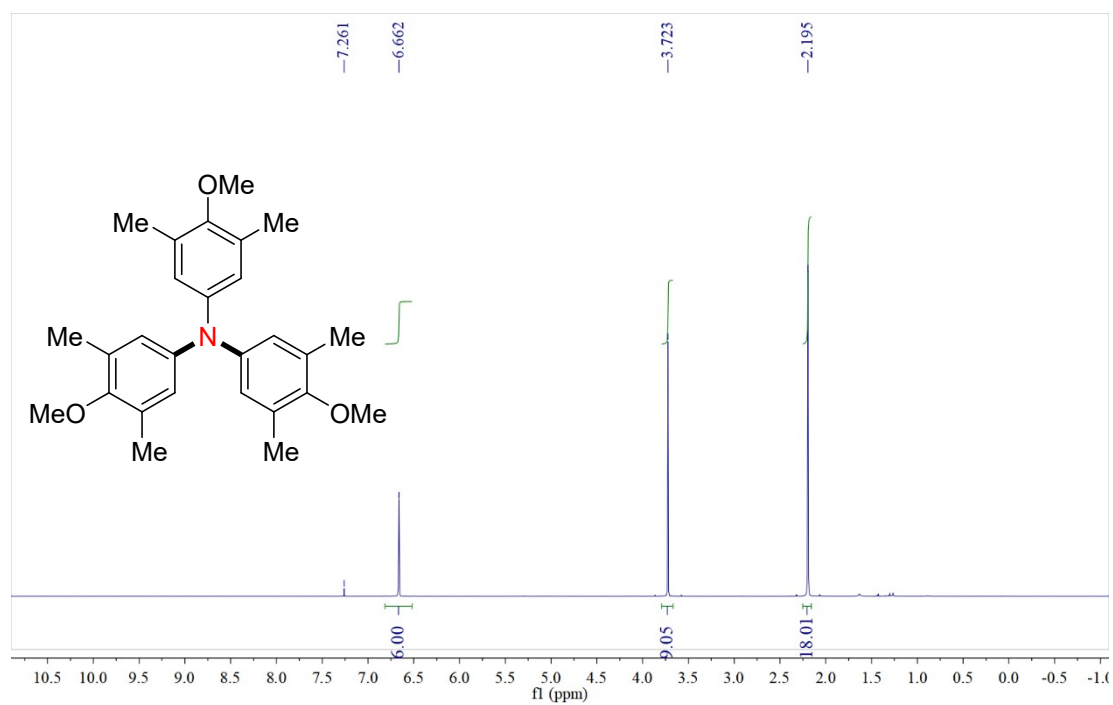

### <sup>13</sup>C NMR Spectrum of **3k**

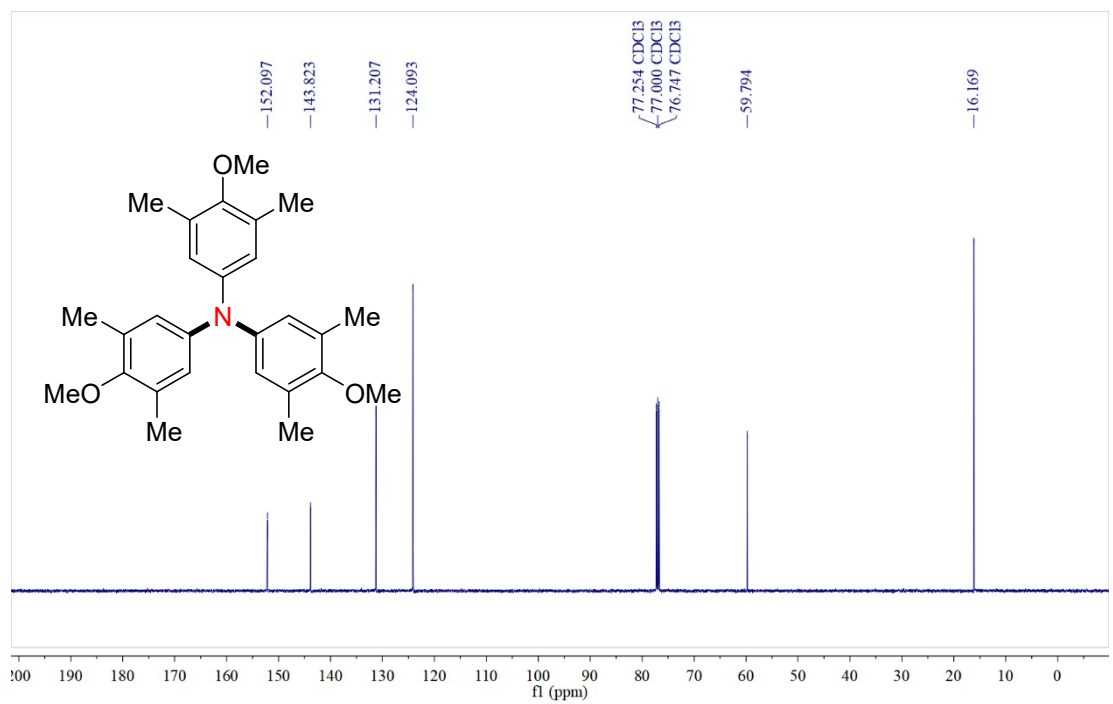

### <sup>1</sup>H NMR Spectrum of **31**

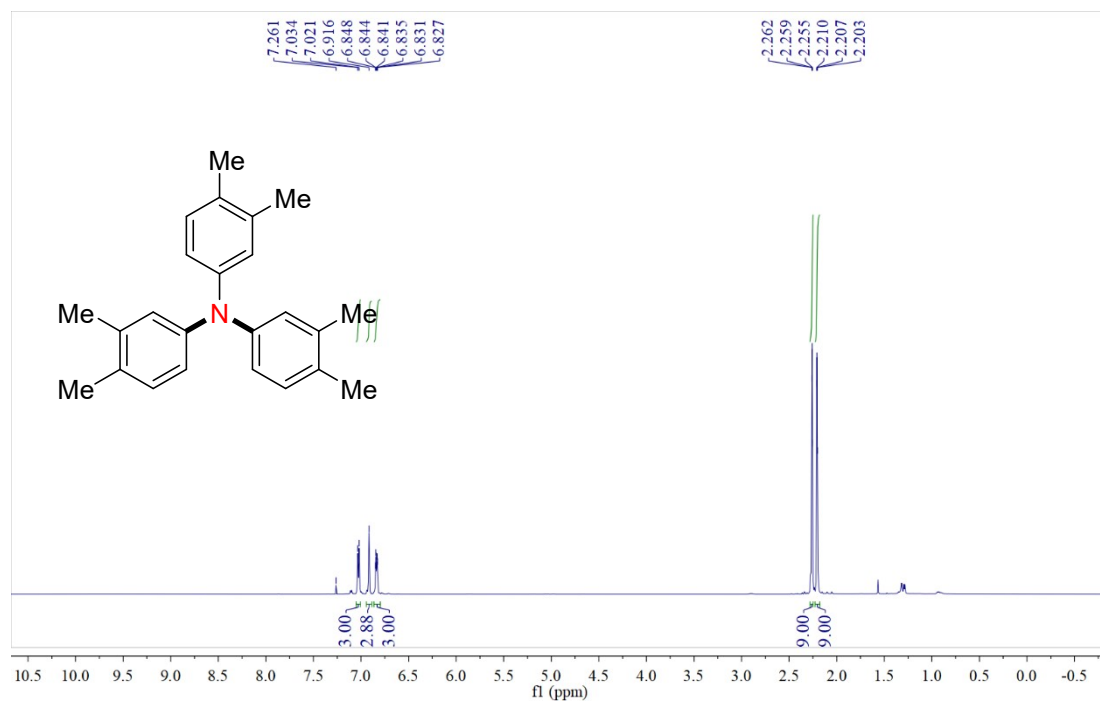

### <sup>13</sup>C NMR Spectrum of **31**

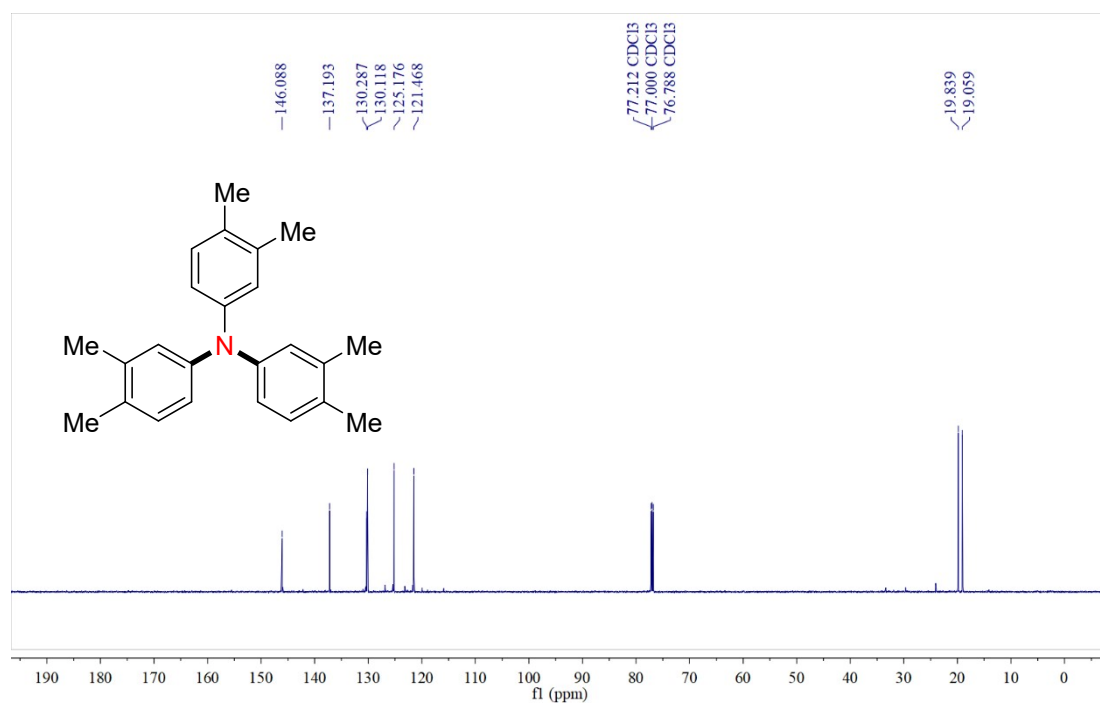

### <sup>1</sup>H NMR Spectrum of **3m**

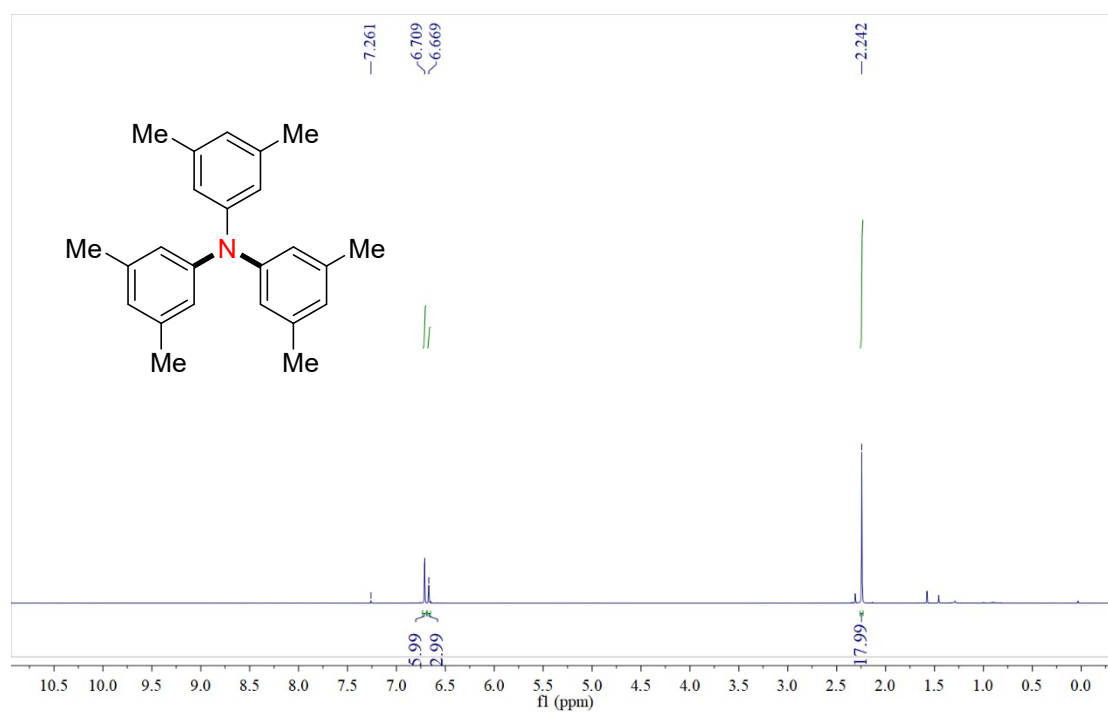

### <sup>13</sup>C NMR Spectrum of **3m**

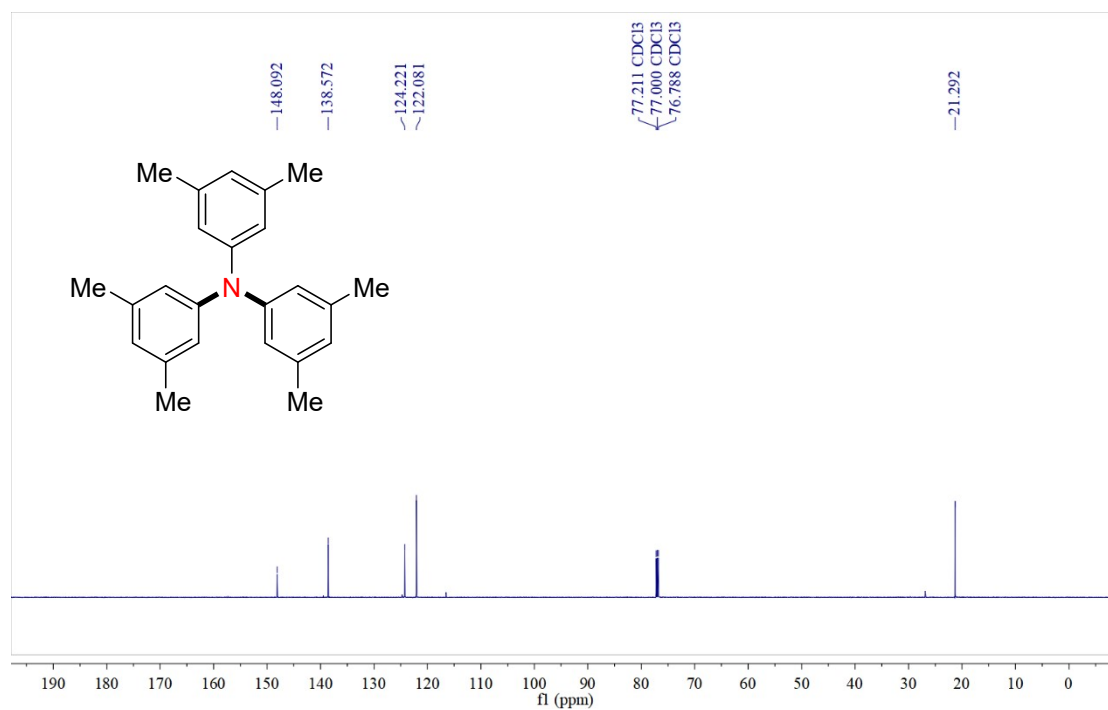

### <sup>1</sup>H NMR Spectrum of **3n**

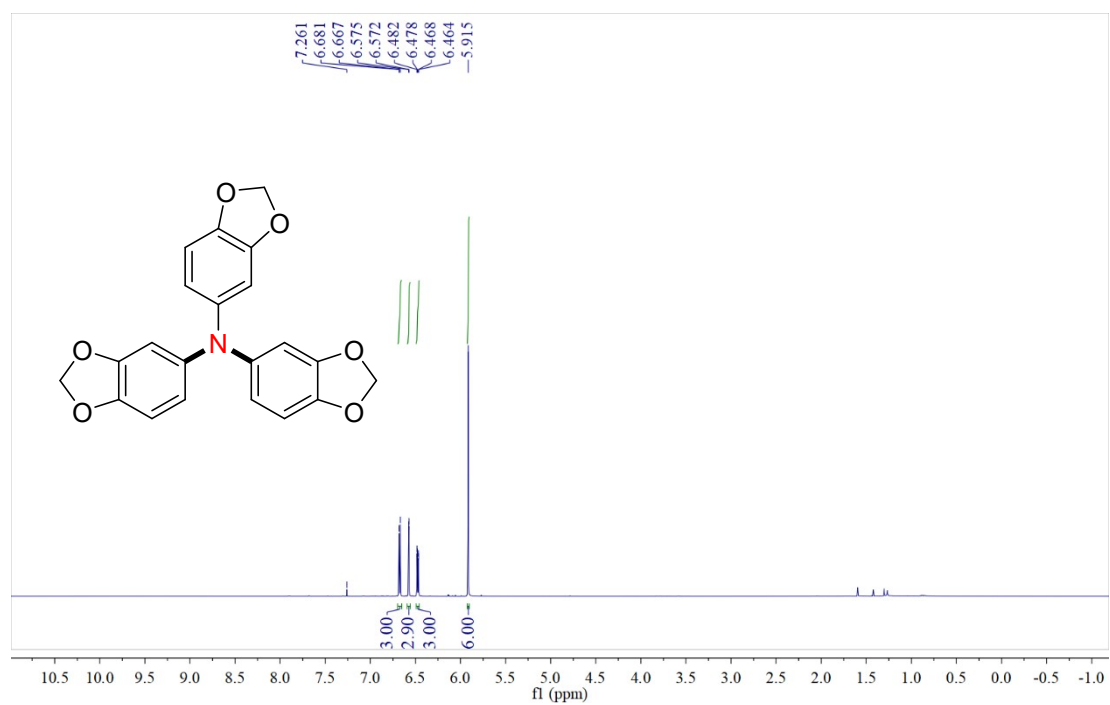

### <sup>13</sup>C NMR Spectrum of **3n**

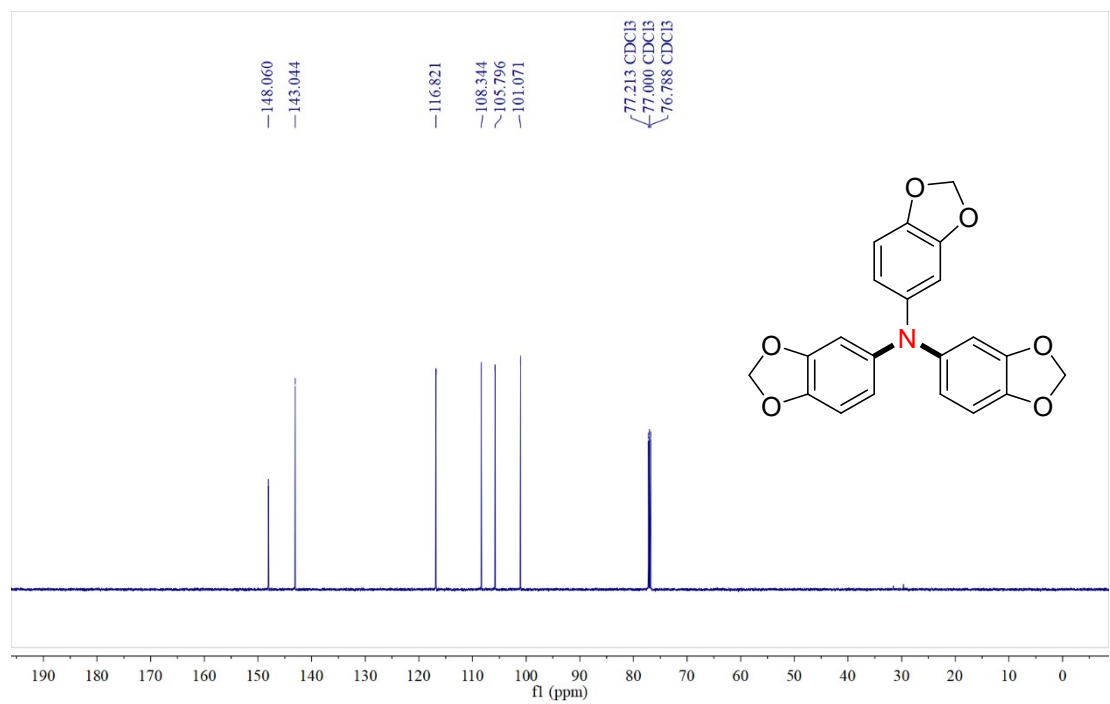

### <sup>1</sup>H NMR Spectrum of **30**

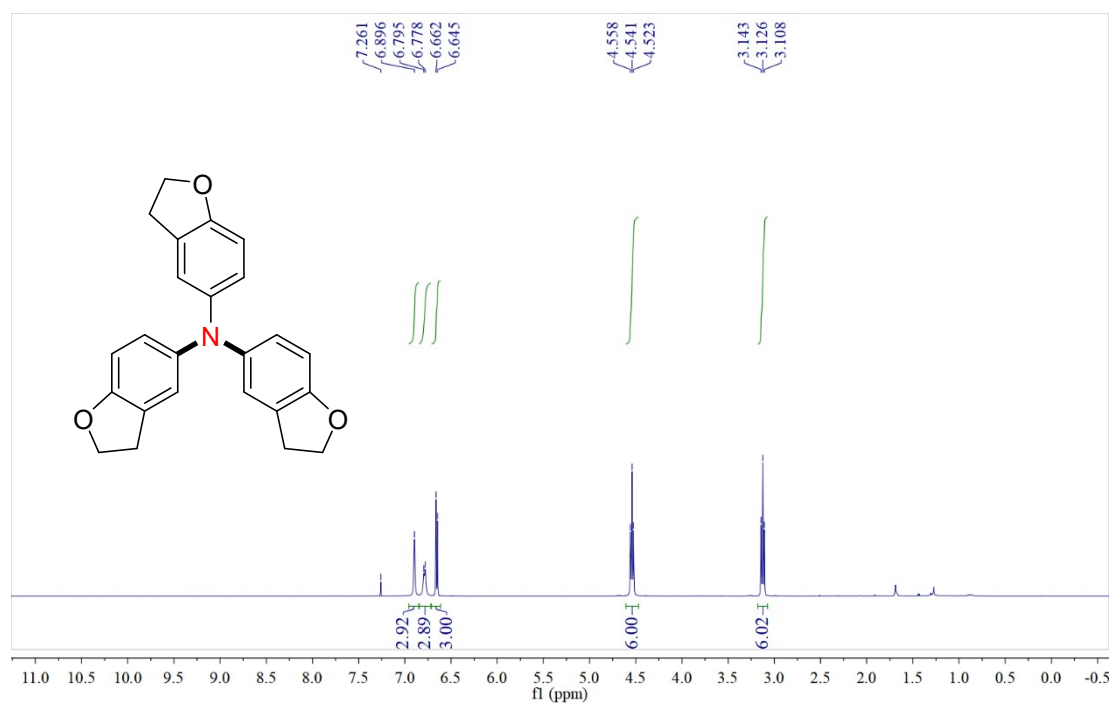

### <sup>13</sup>C NMR Spectrum of **30**

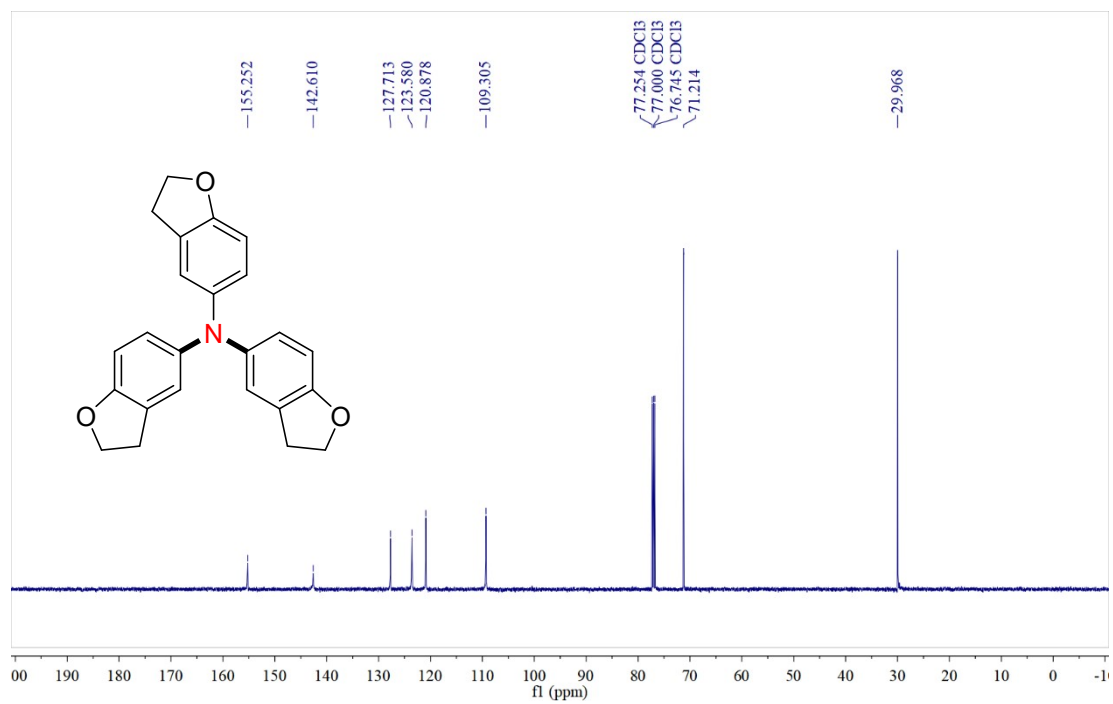

### <sup>1</sup>H NMR Spectrum of **3p**

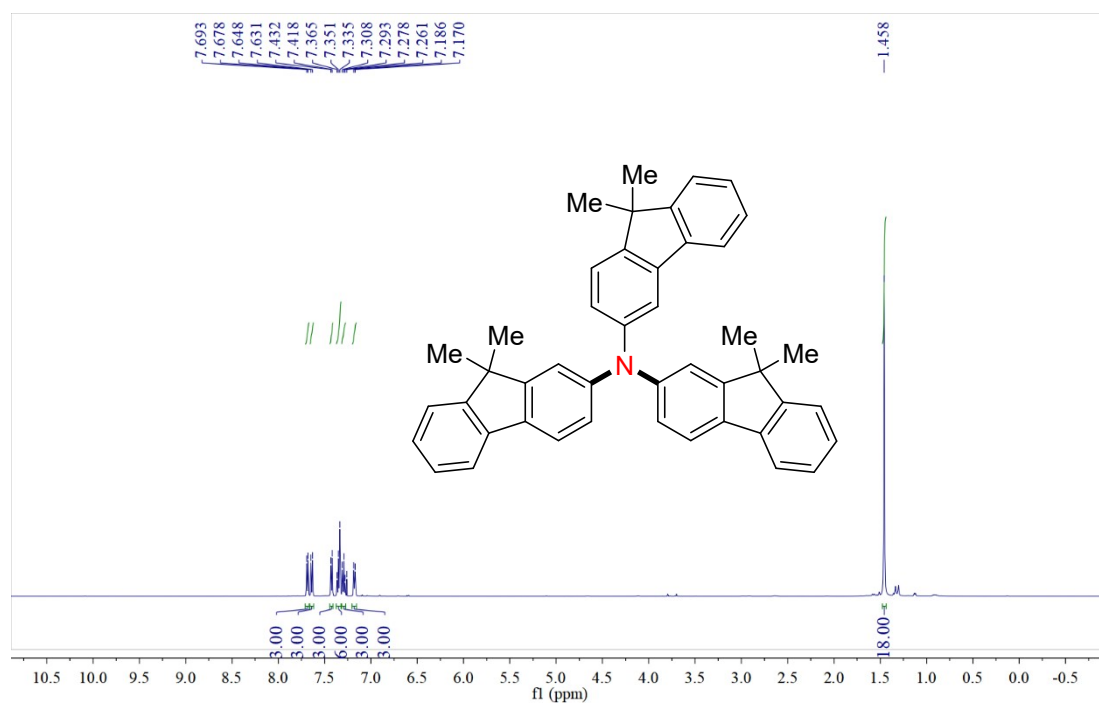

### <sup>13</sup>C NMR Spectrum of **3p**

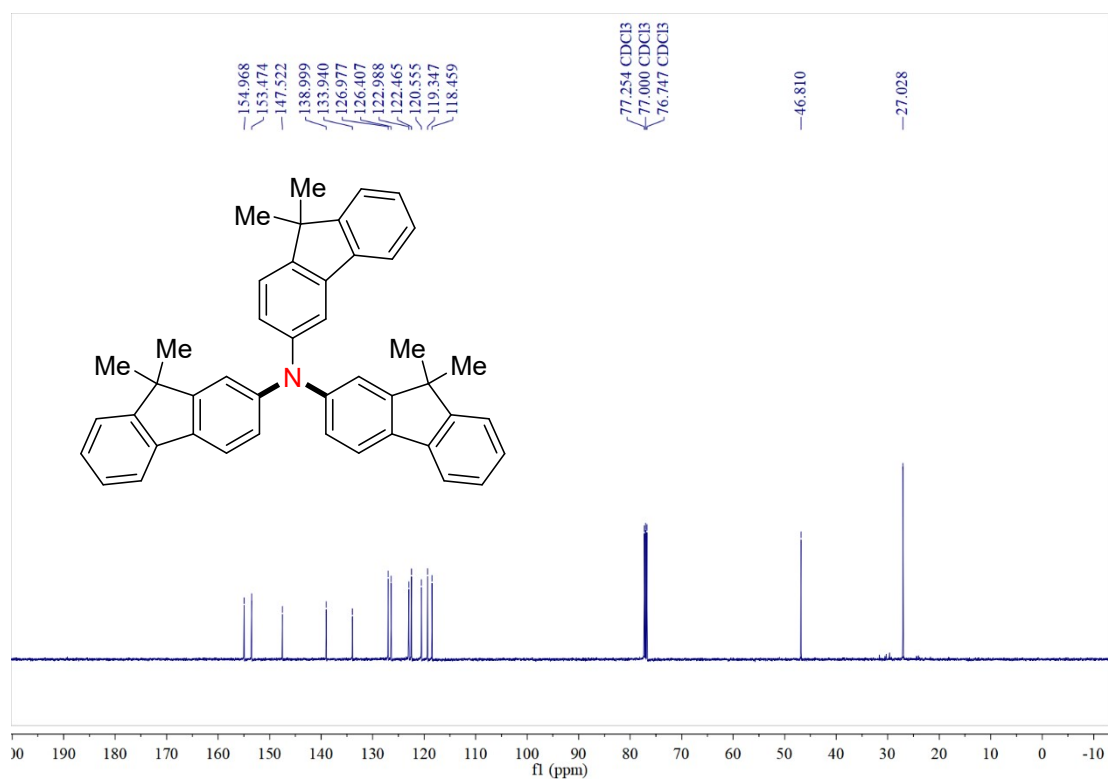

### <sup>1</sup>H NMR Spectrum of **3q**

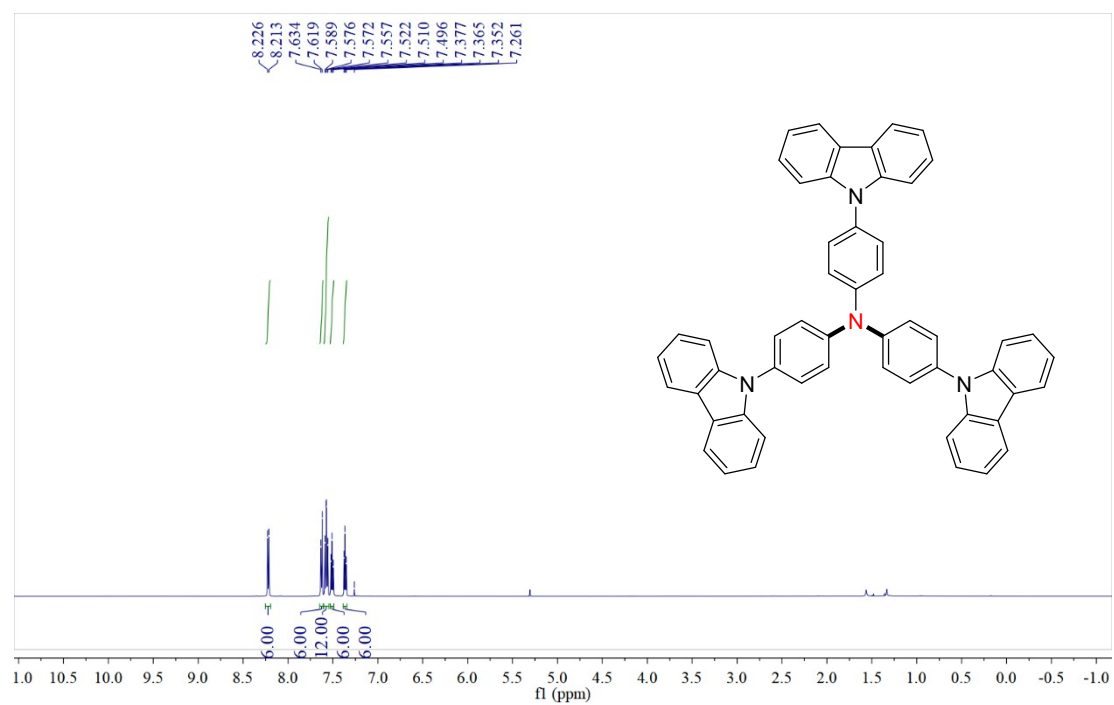

### <sup>13</sup>C NMR Spectrum of **3q**

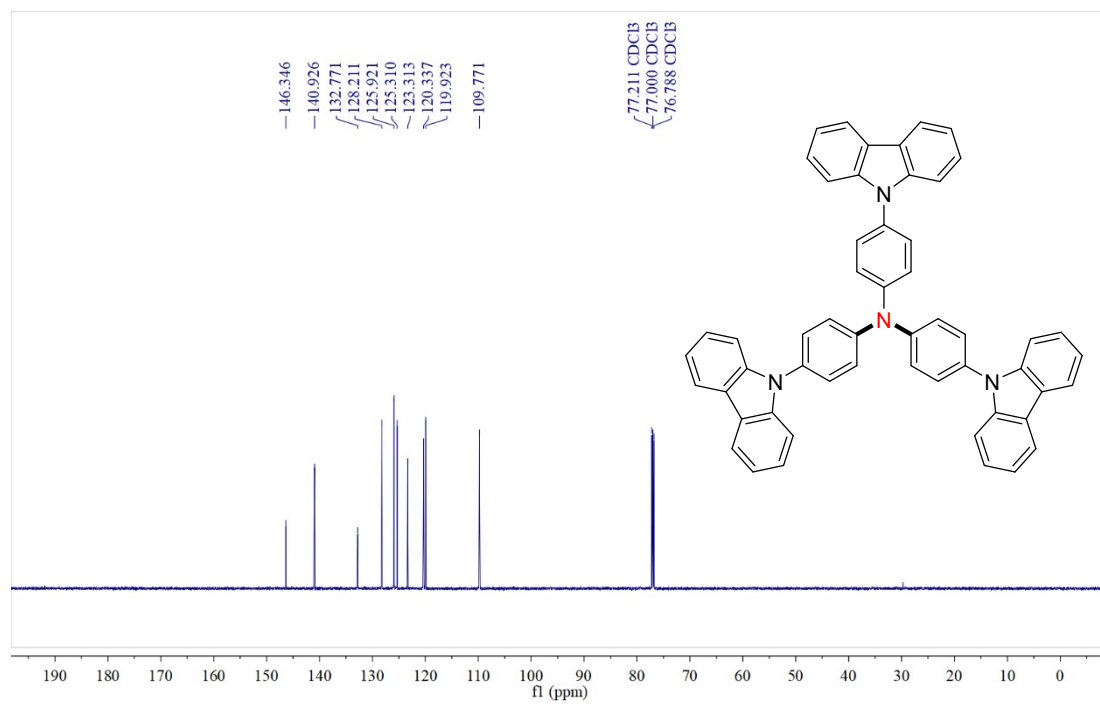

### <sup>1</sup>H NMR Spectrum of 4a

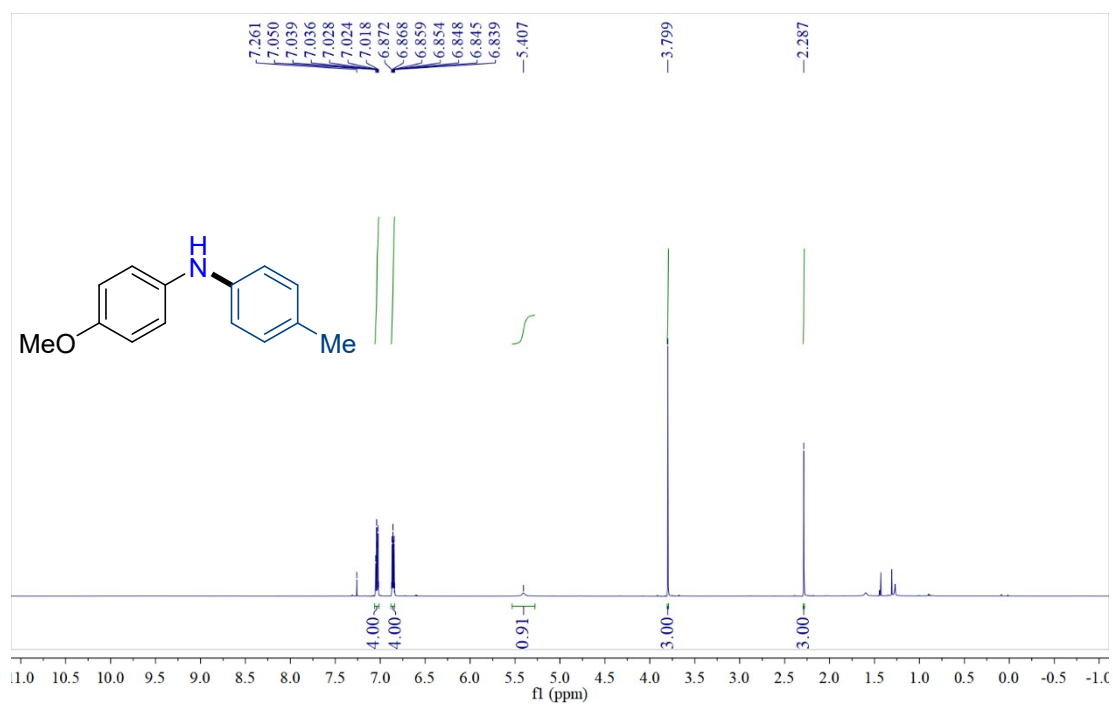

### <sup>13</sup>C NMR Spectrum of 4a

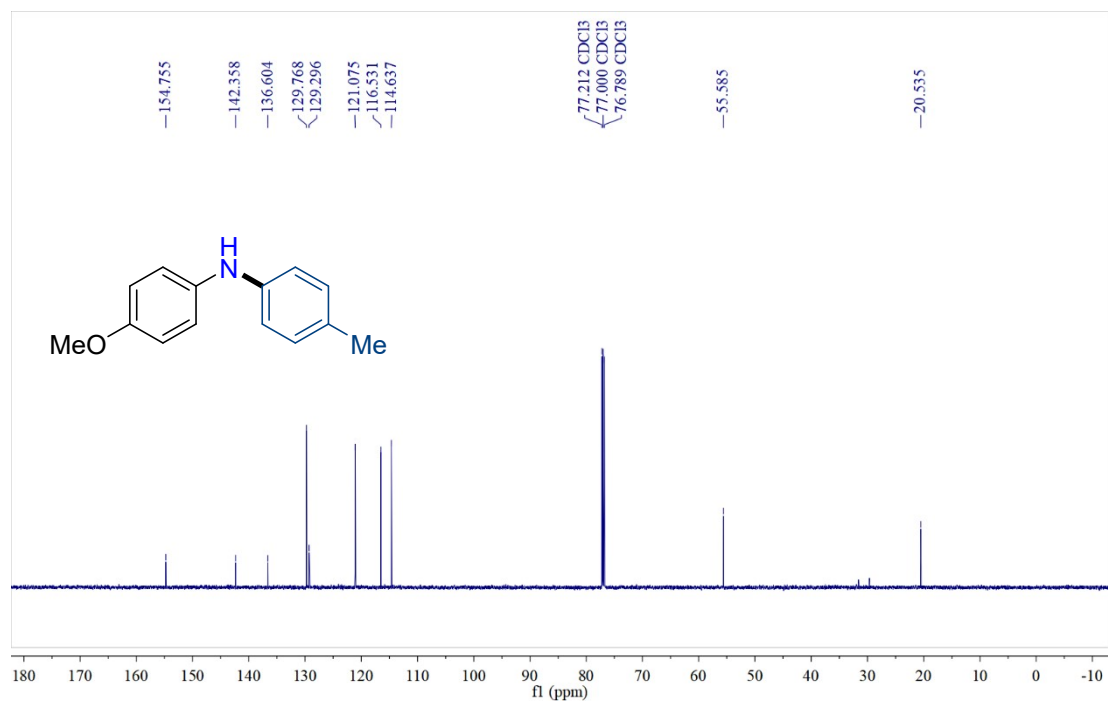



### <sup>1</sup>H NMR Spectrum of **4b**

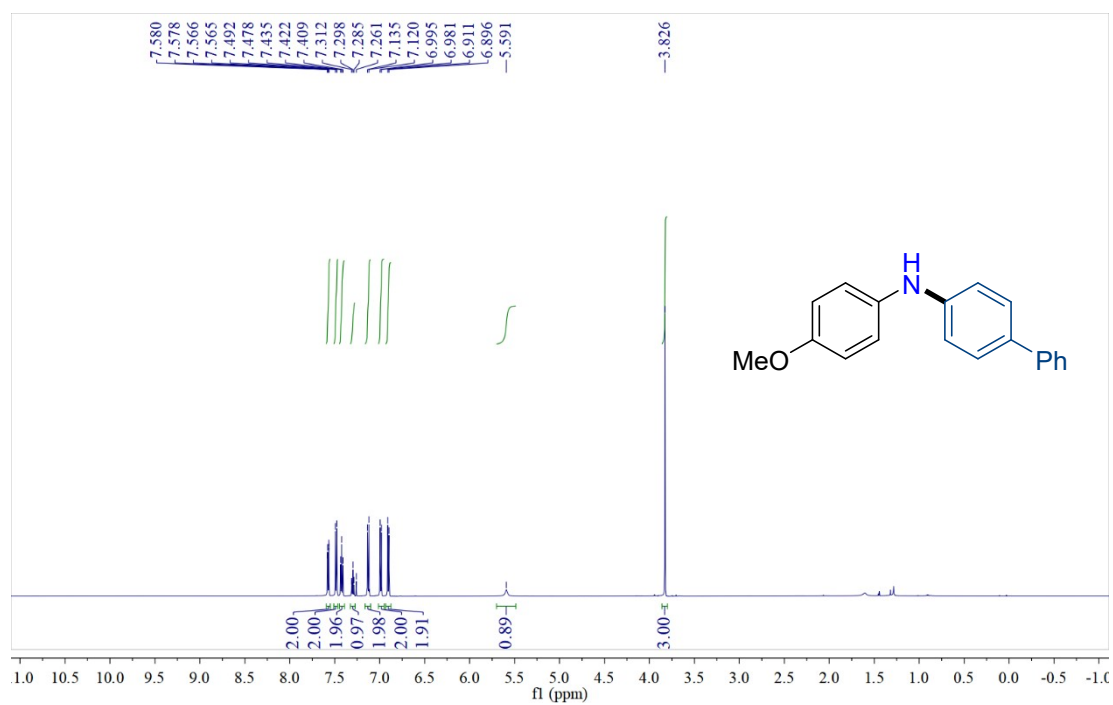

### <sup>13</sup>C NMR Spectrum of **4b**

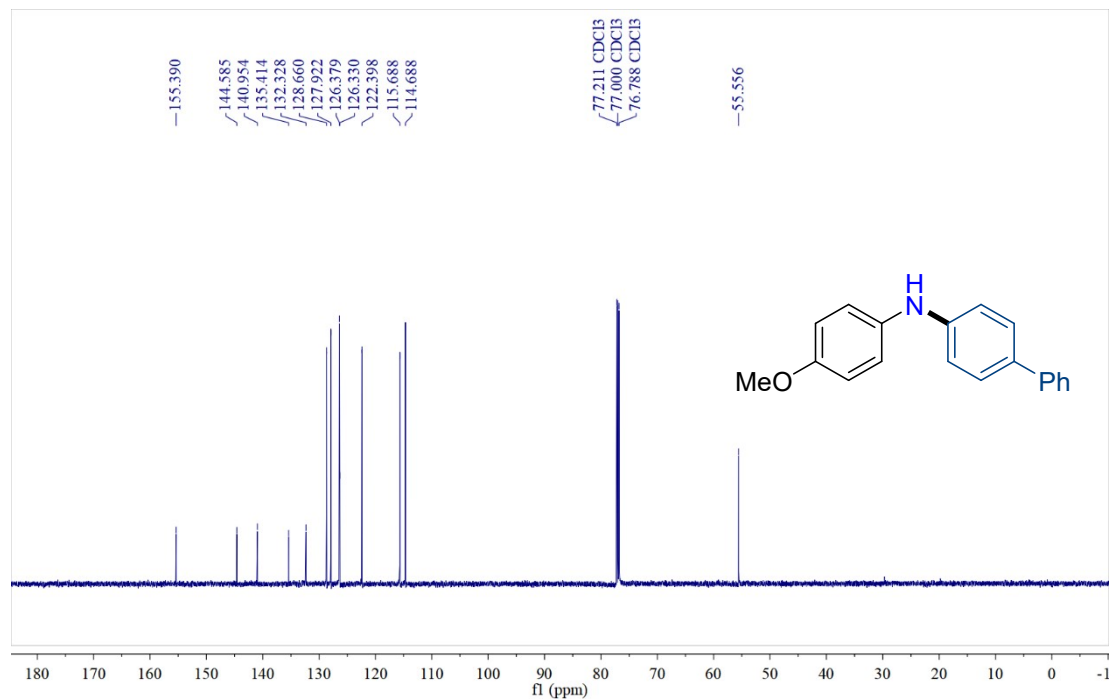

### <sup>1</sup>H NMR Spectrum of 4c

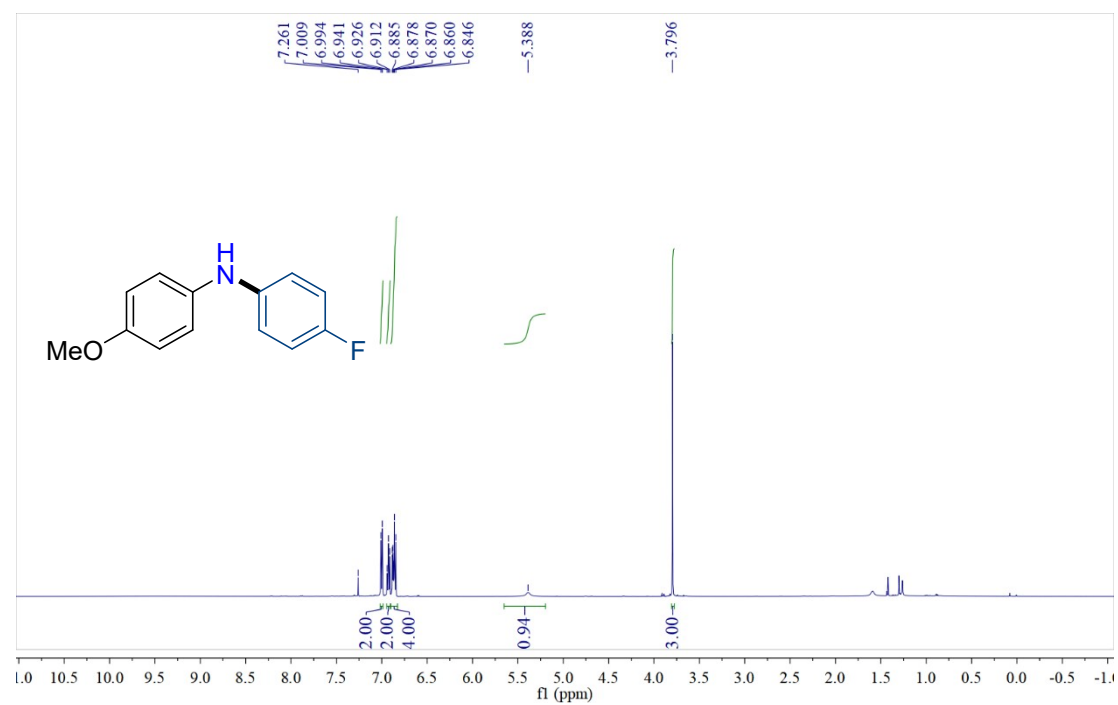

### <sup>13</sup>C NMR Spectrum of 4c

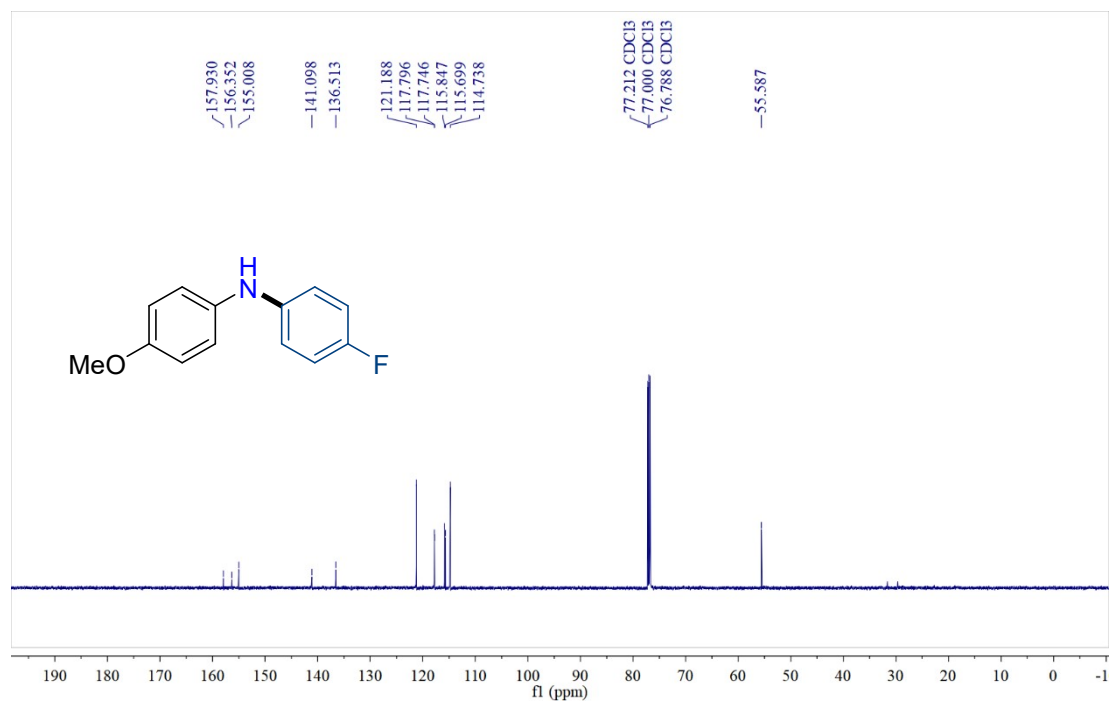

### $^{19}\text{F}$ NMR Spectrum of **4c**

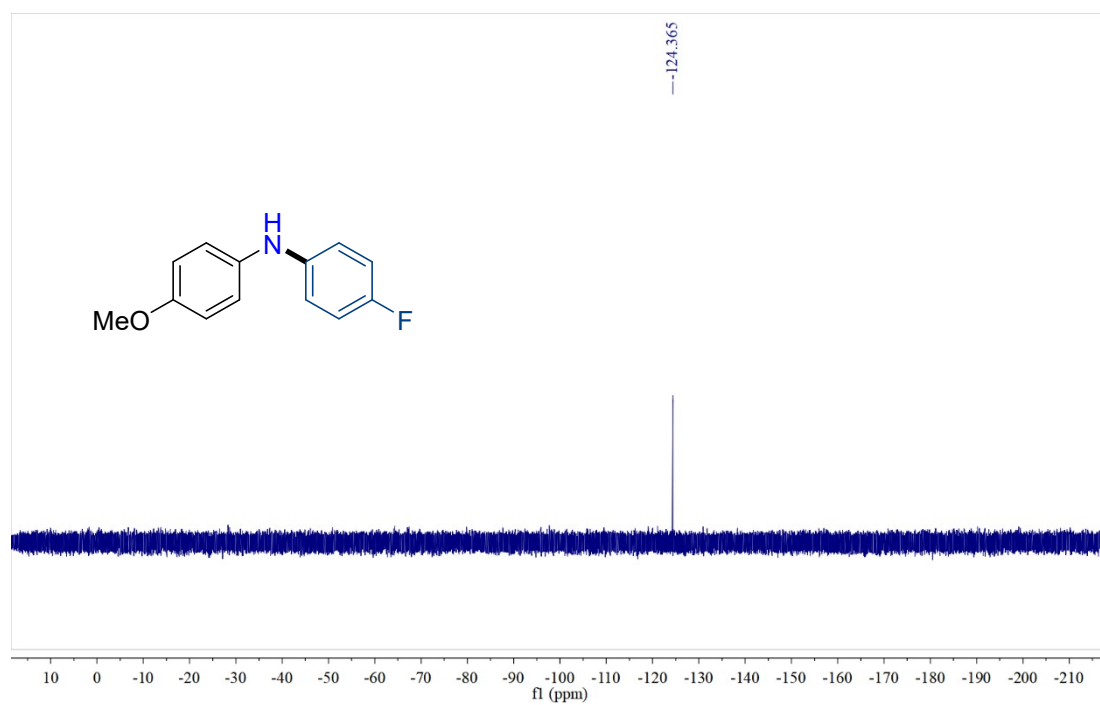

### $^1\text{H}$ NMR Spectrum of **4d**

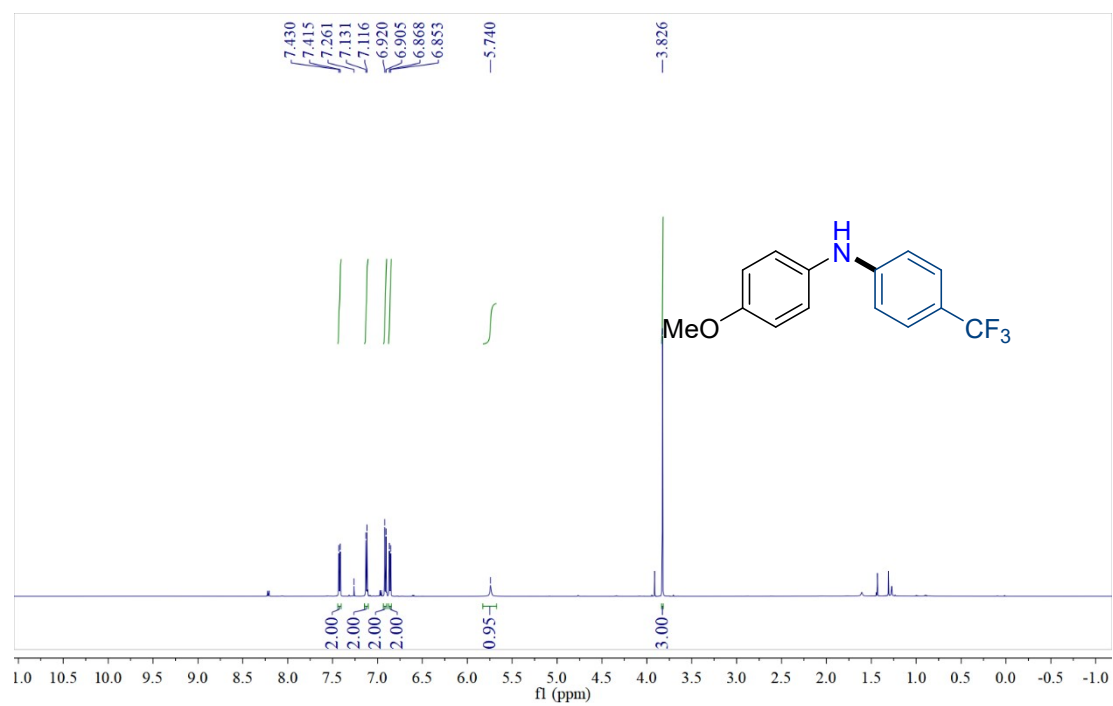

### <sup>13</sup>C NMR Spectrum of **4d**

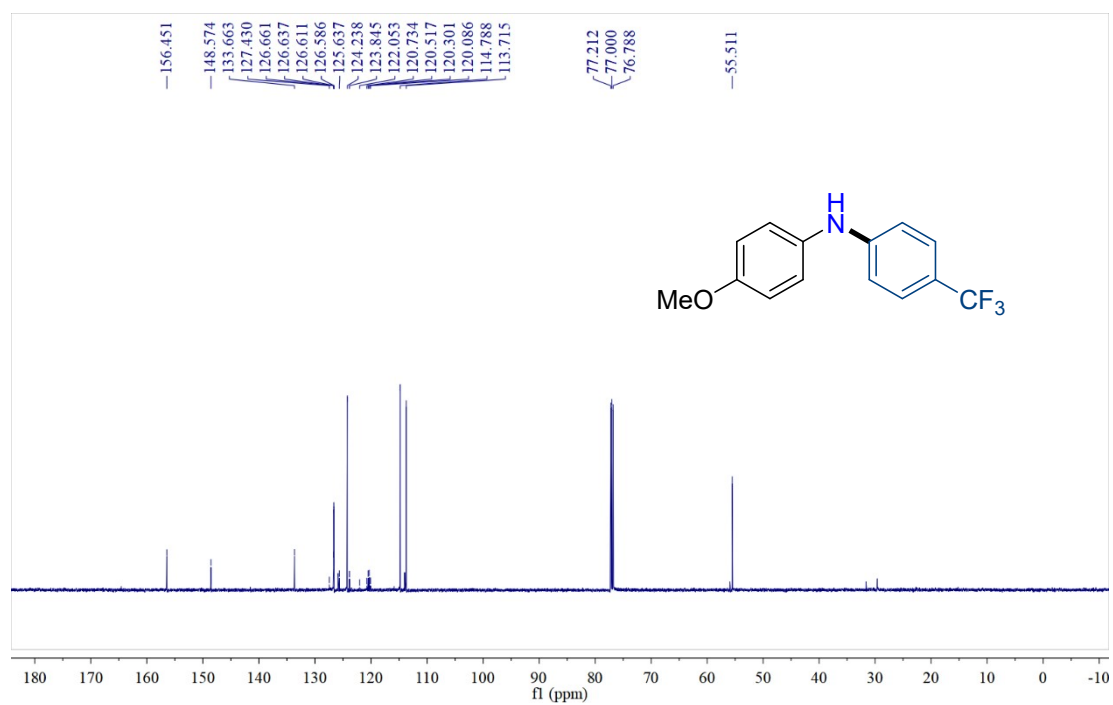

### <sup>19</sup>F NMR Spectrum of **4d**

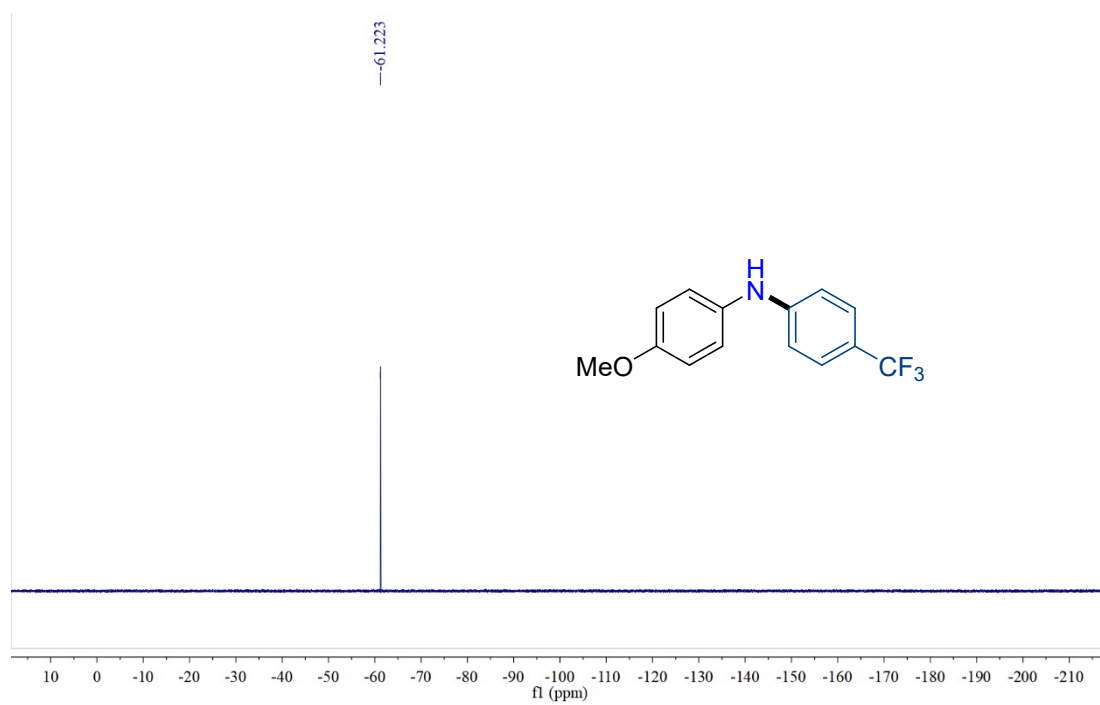

### <sup>1</sup>H NMR Spectrum of 4e

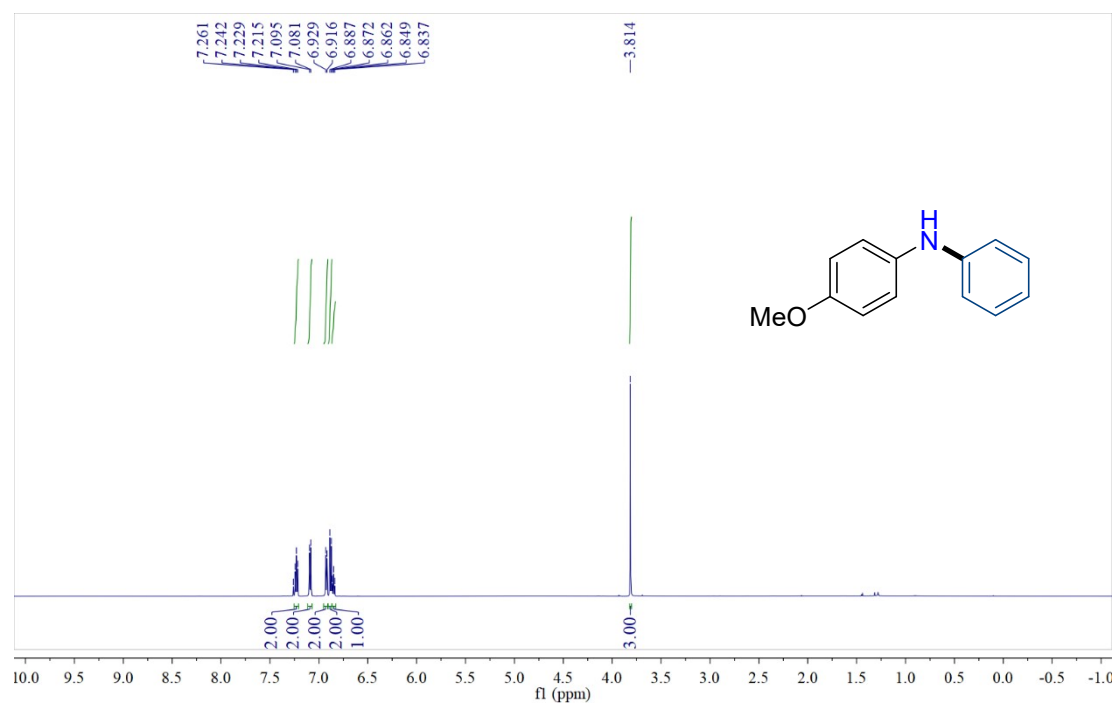

### <sup>13</sup>C NMR Spectrum of 4e

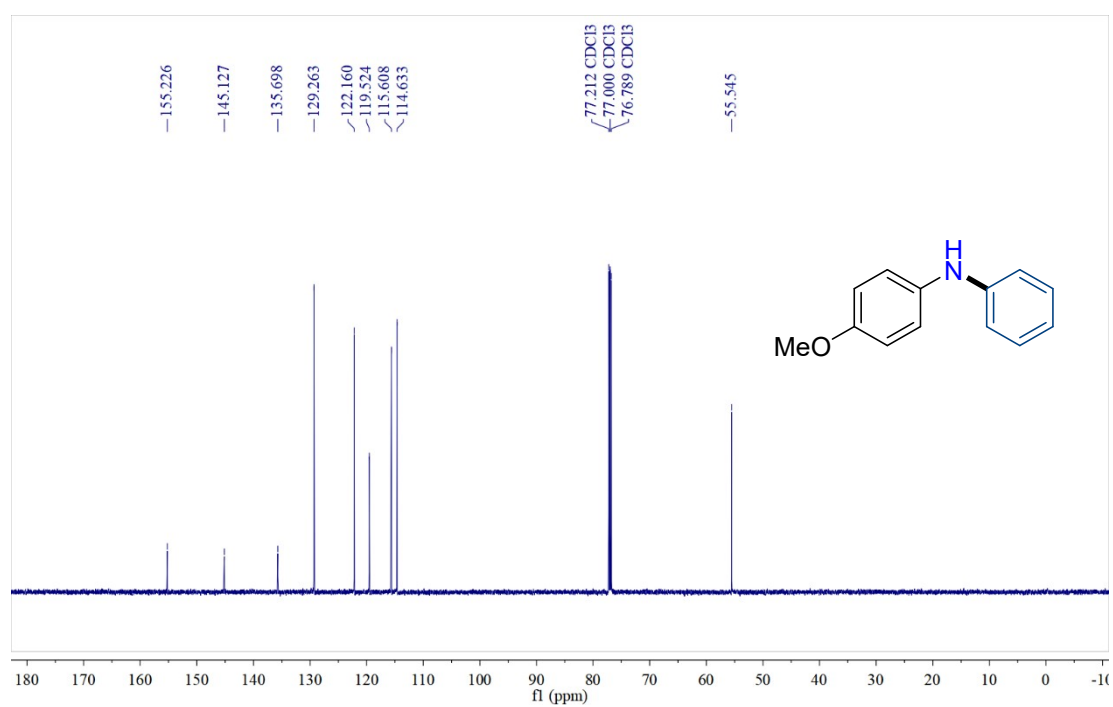

### <sup>1</sup>H NMR Spectrum of 4f

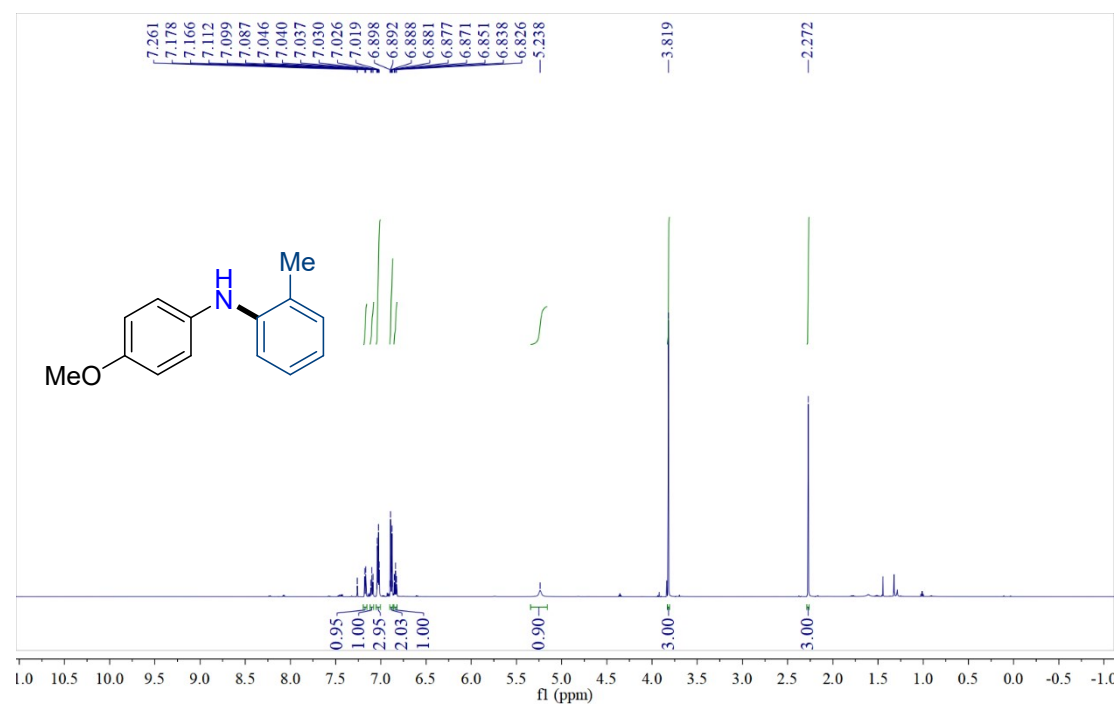

### <sup>13</sup>C NMR Spectrum of 4f

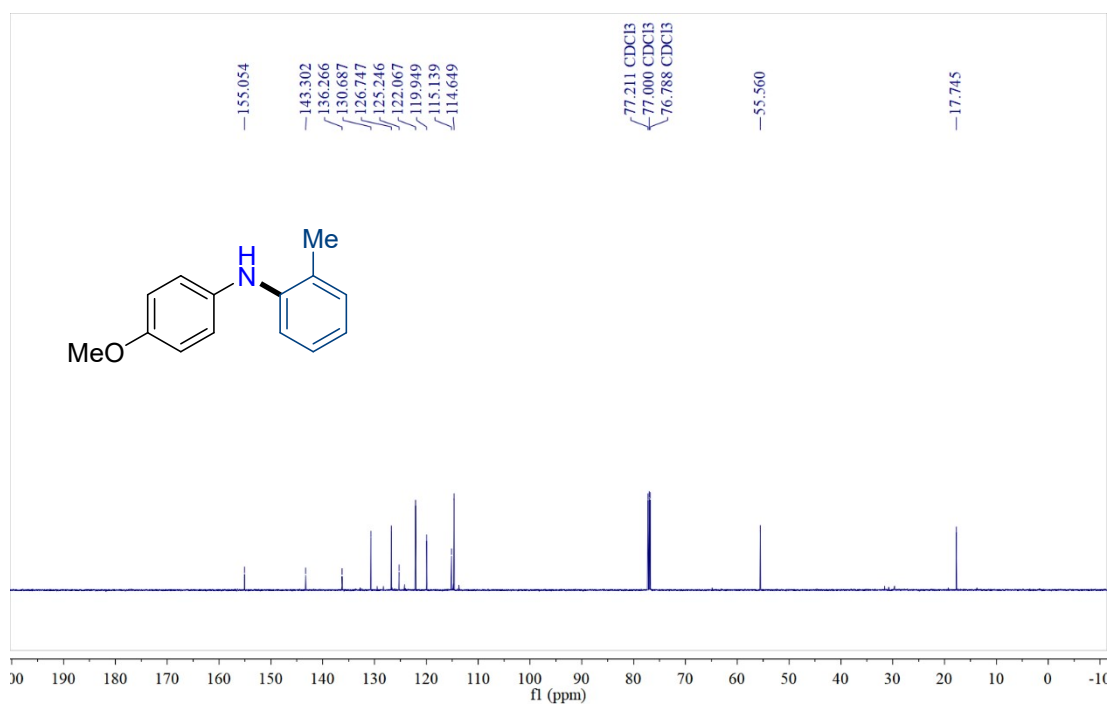

### <sup>1</sup>H NMR Spectrum of 4g

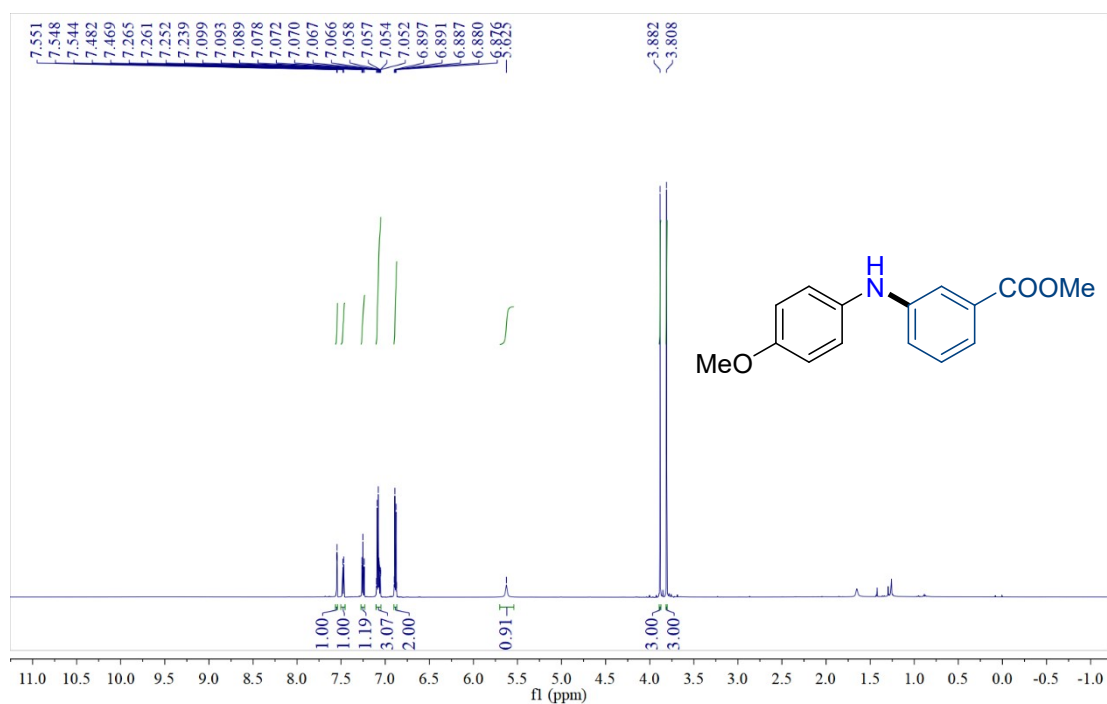

### <sup>13</sup>C NMR Spectrum of 4g

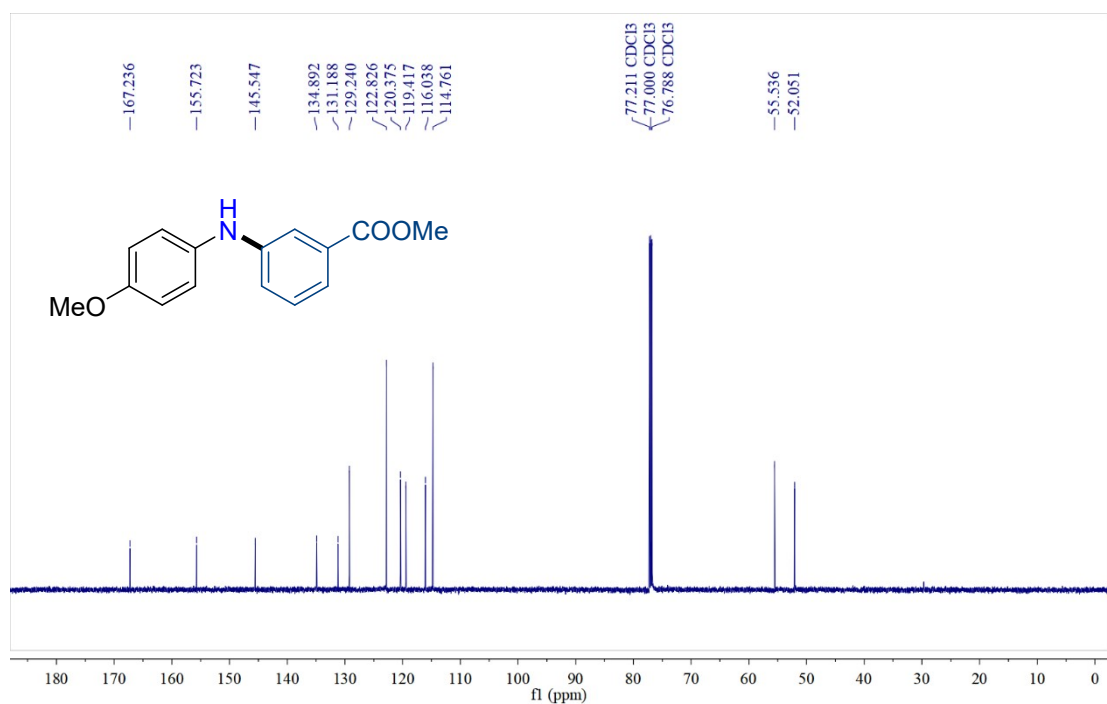

### <sup>1</sup>H NMR Spectrum of **4h**

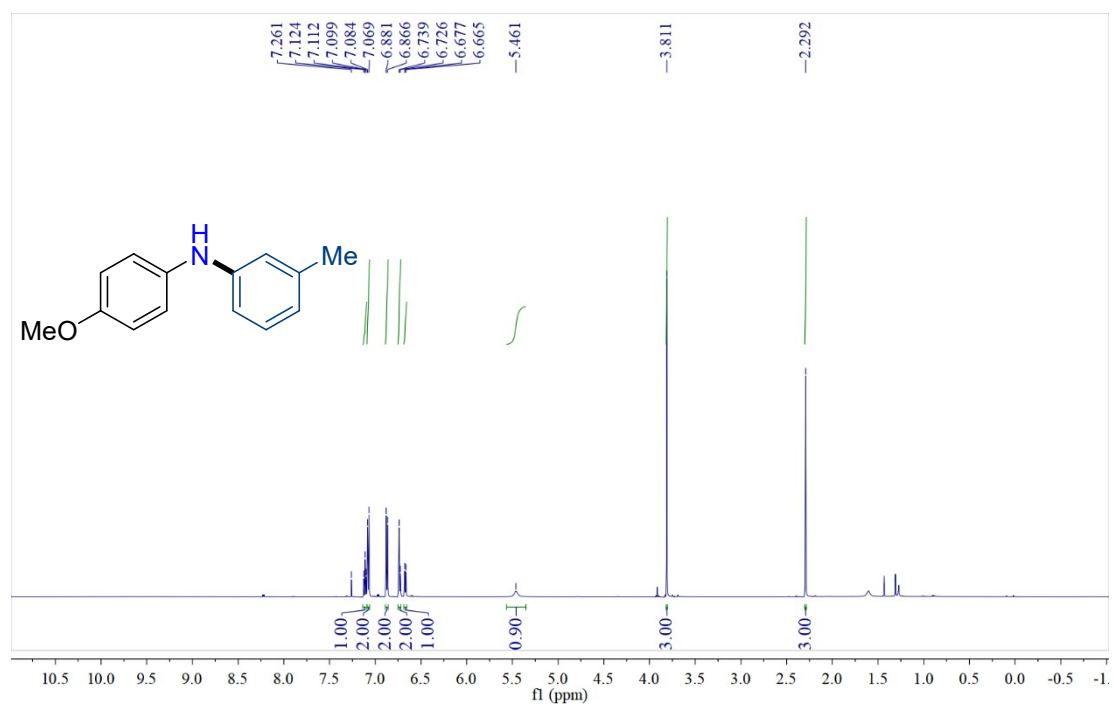

### <sup>13</sup>C NMR Spectrum of **4h**

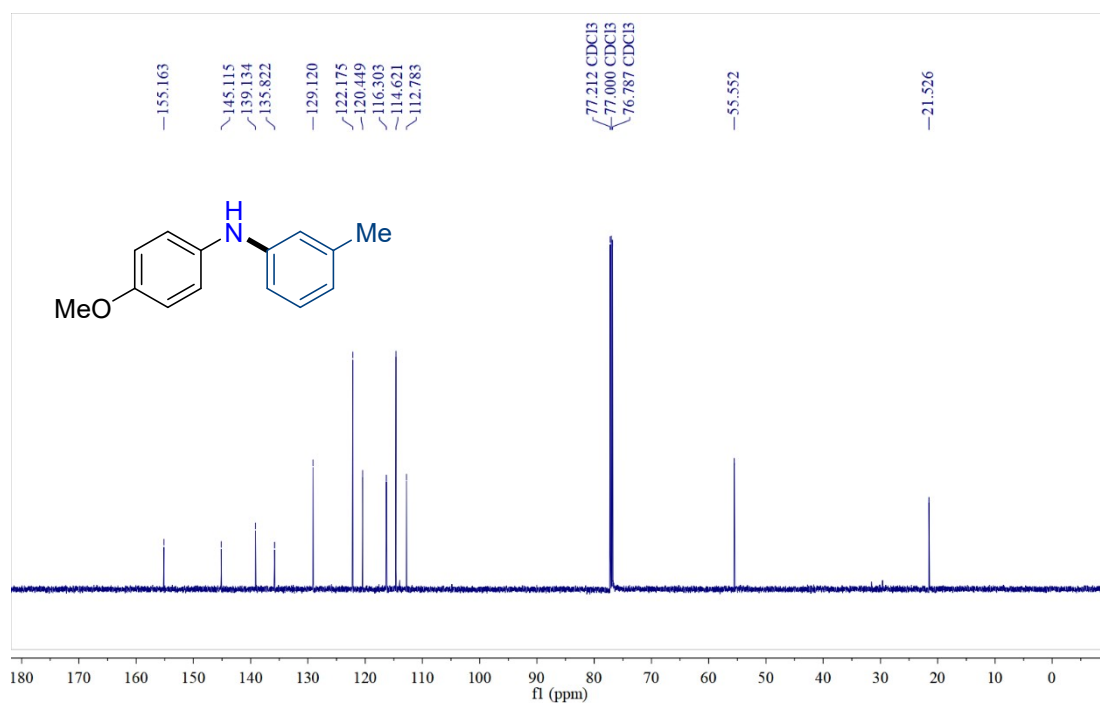



### <sup>1</sup>H NMR Spectrum of **4i**

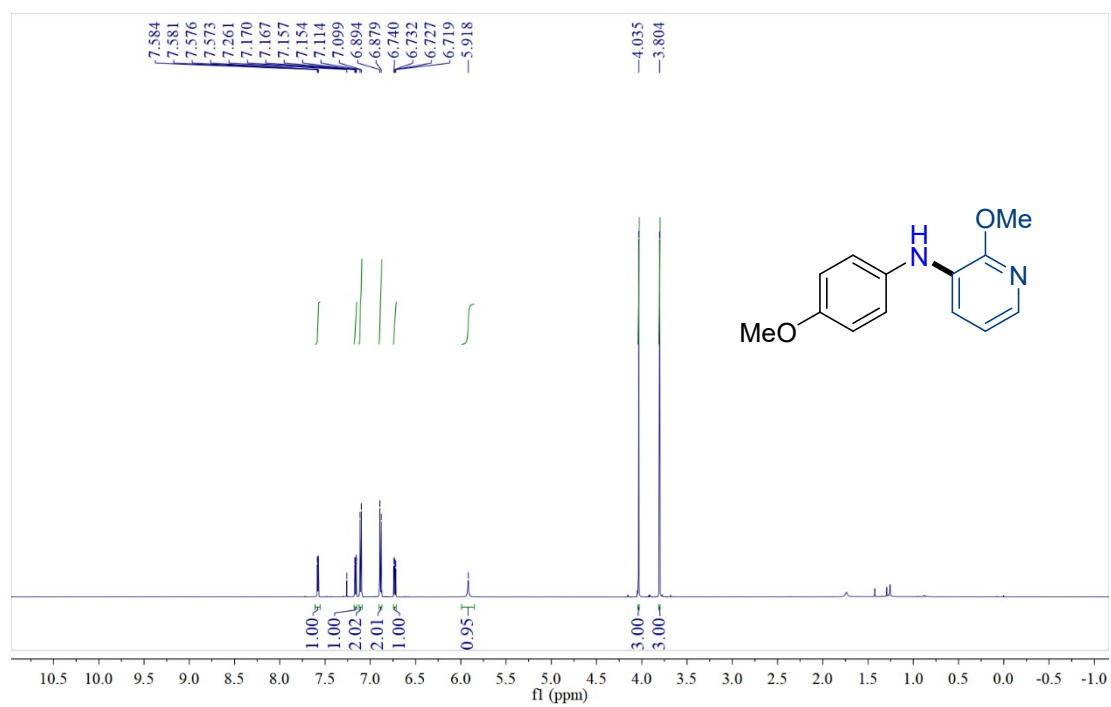

### <sup>13</sup>C NMR Spectrum of **4i**

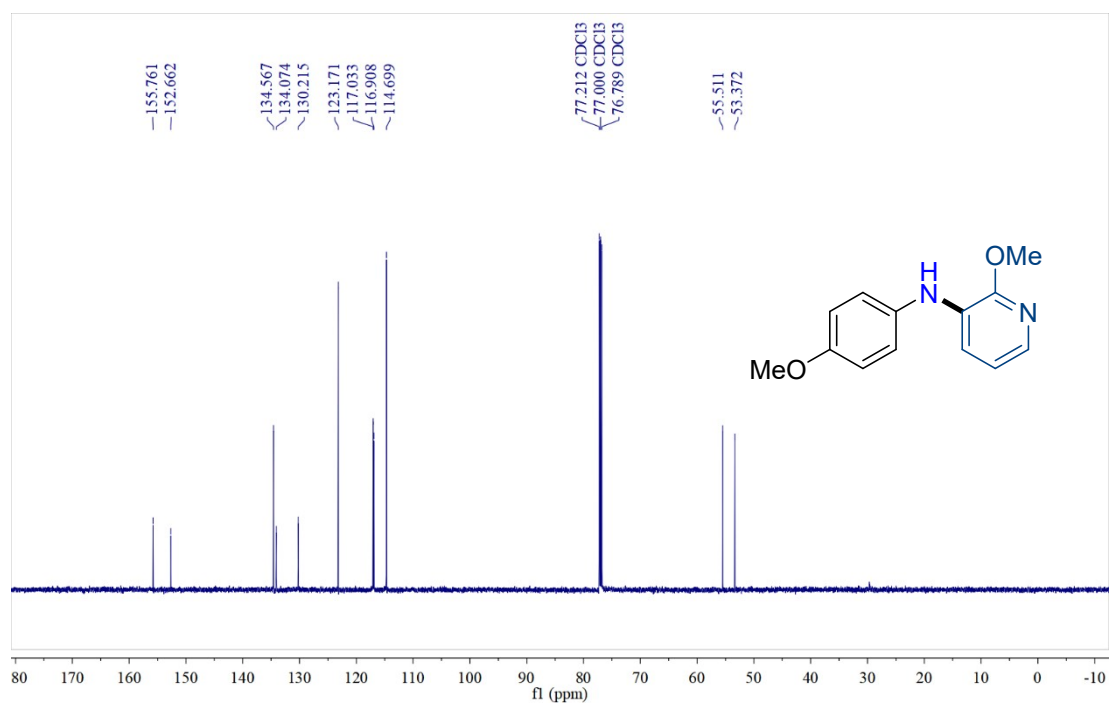

### <sup>1</sup>H NMR Spectrum of 4j

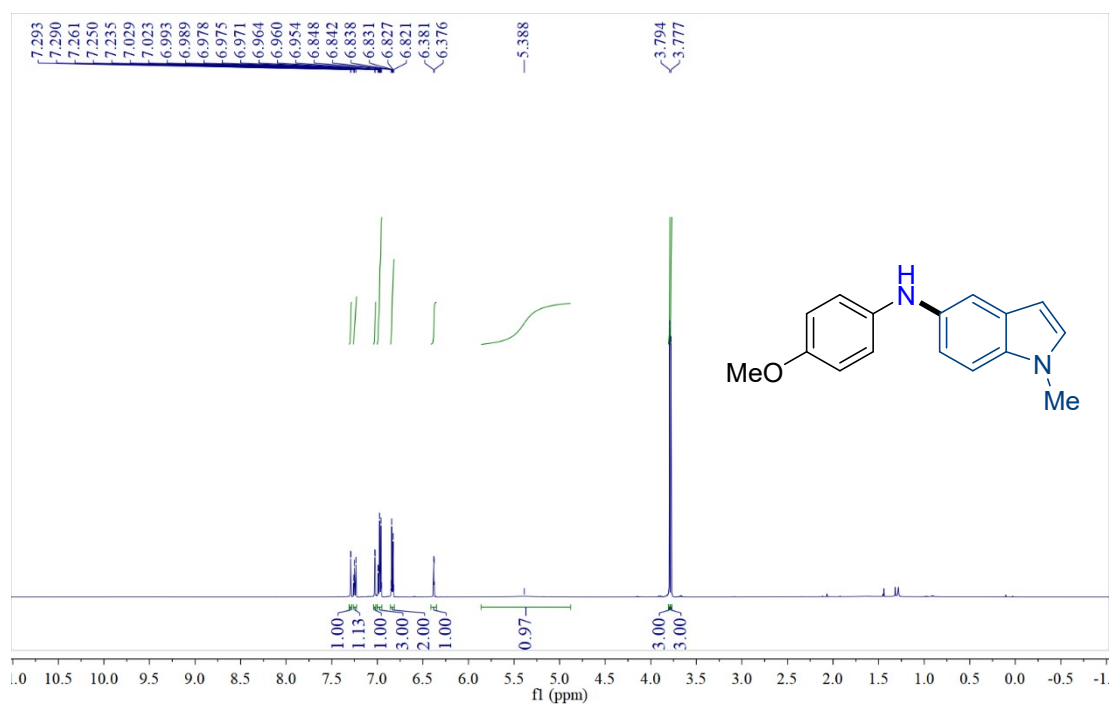

### <sup>13</sup>C NMR Spectrum of 4j

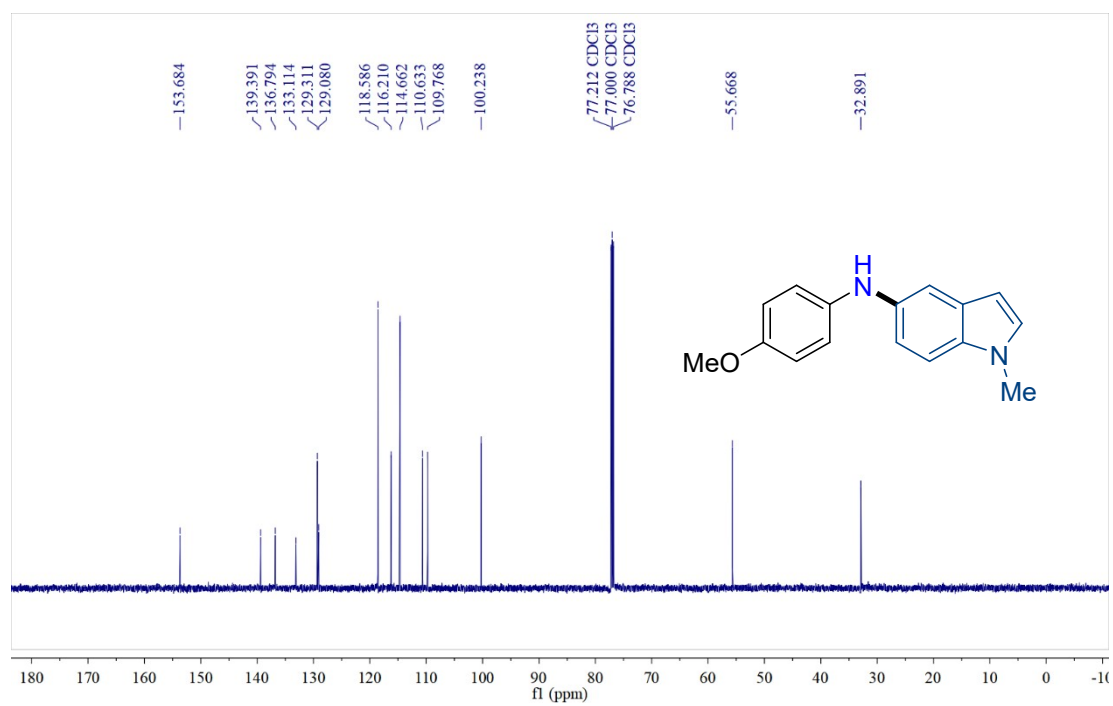

### <sup>1</sup>H NMR Spectrum of **4k**

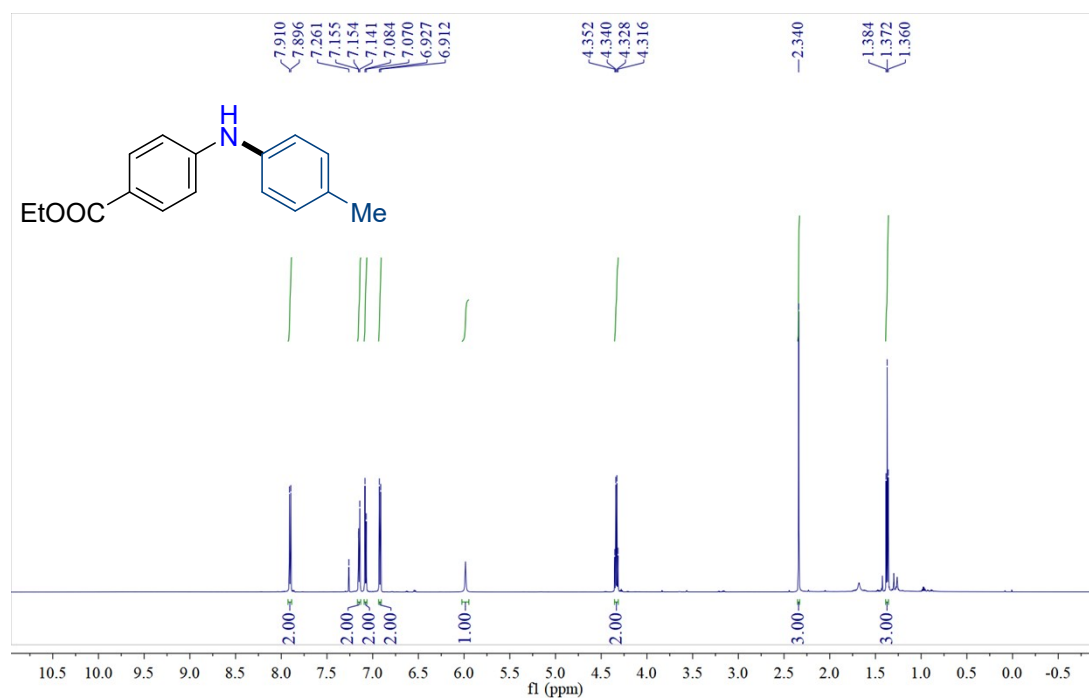

### <sup>13</sup>C NMR Spectrum of **4k**

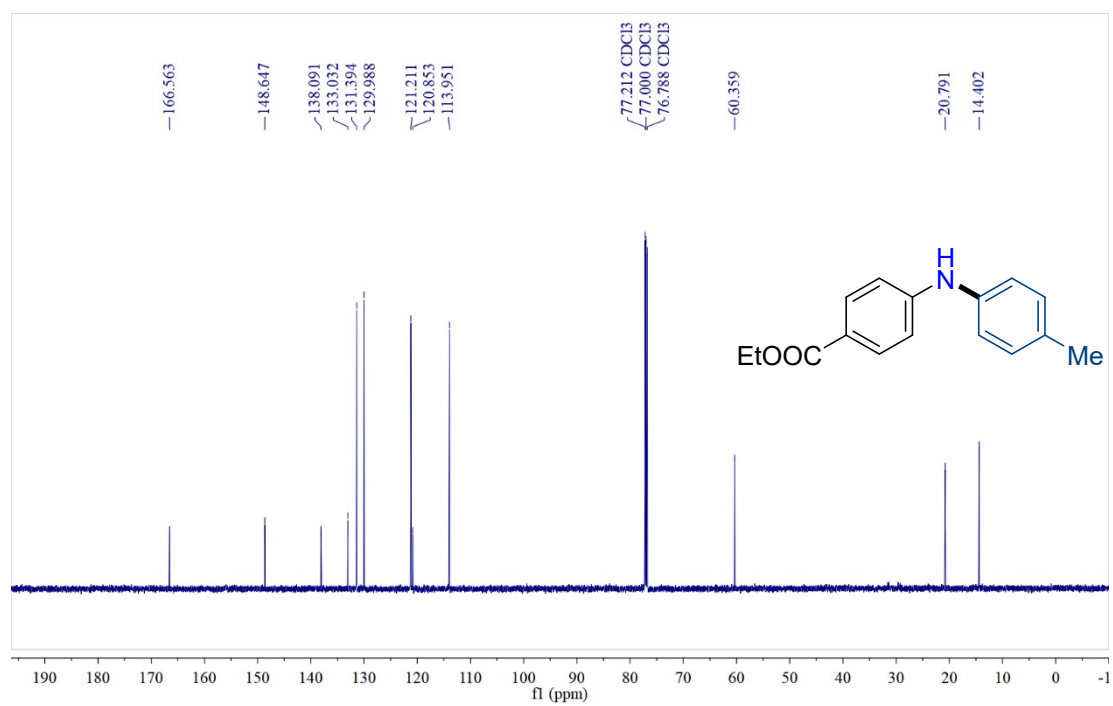

### <sup>1</sup>H NMR Spectrum of **4l**

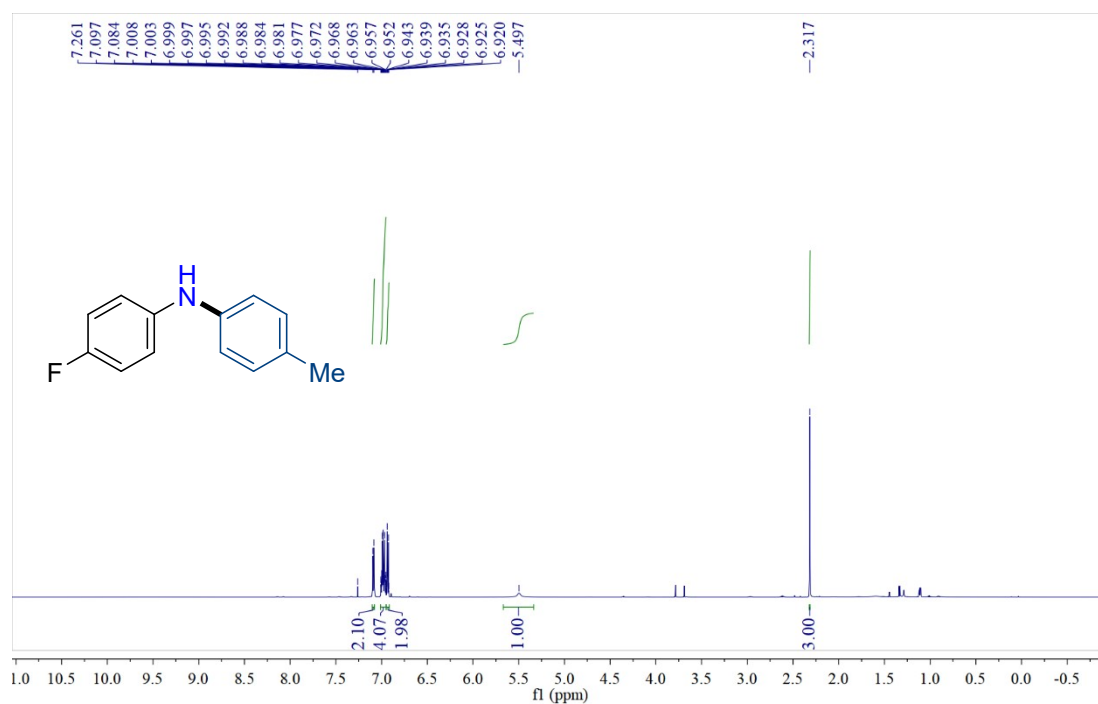

### <sup>13</sup>C NMR Spectrum of **4l**

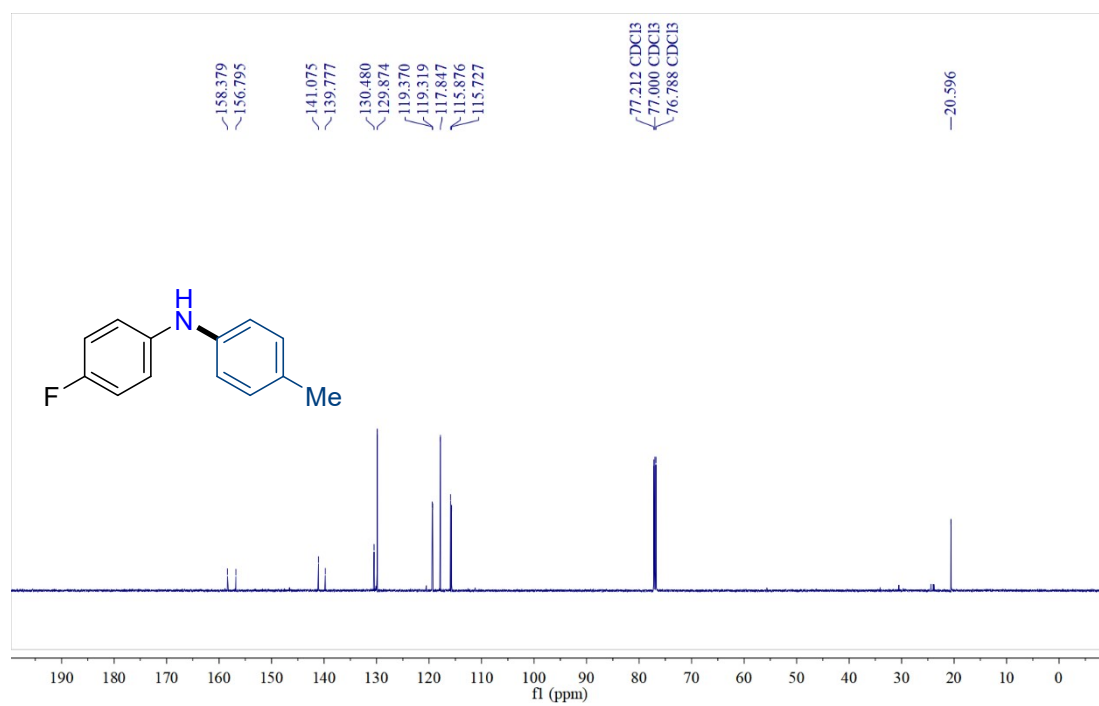

### $^{19}\text{F}$ NMR Spectrum of **4l**

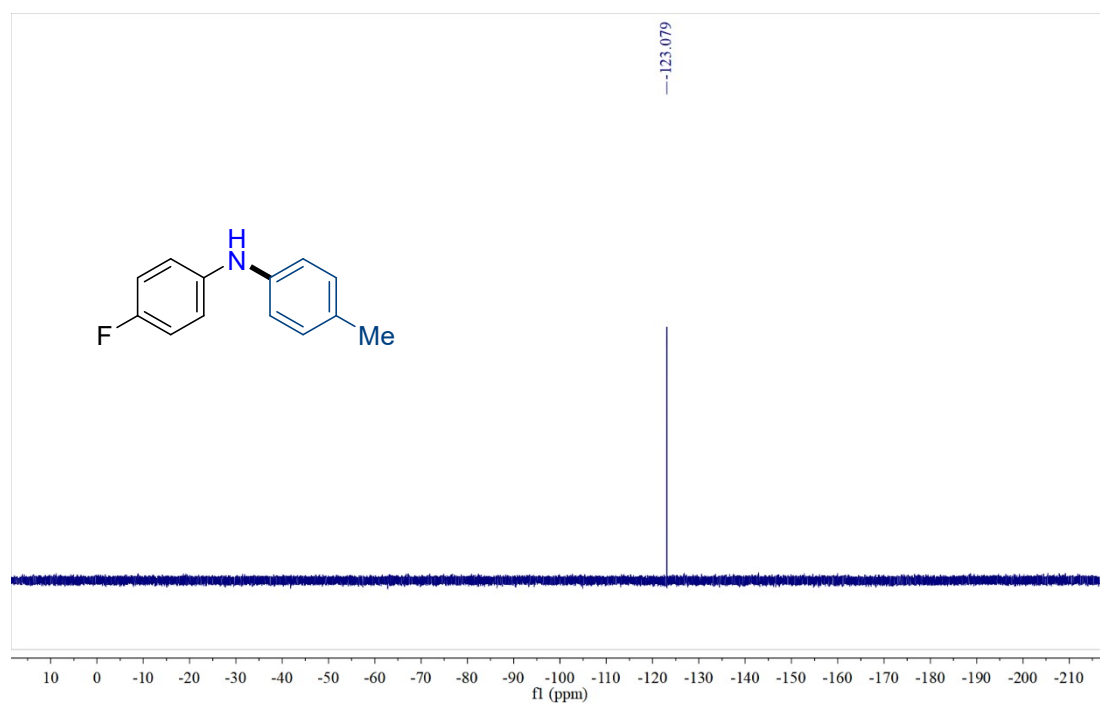

### $^1\text{H}$ NMR Spectrum of **4m**

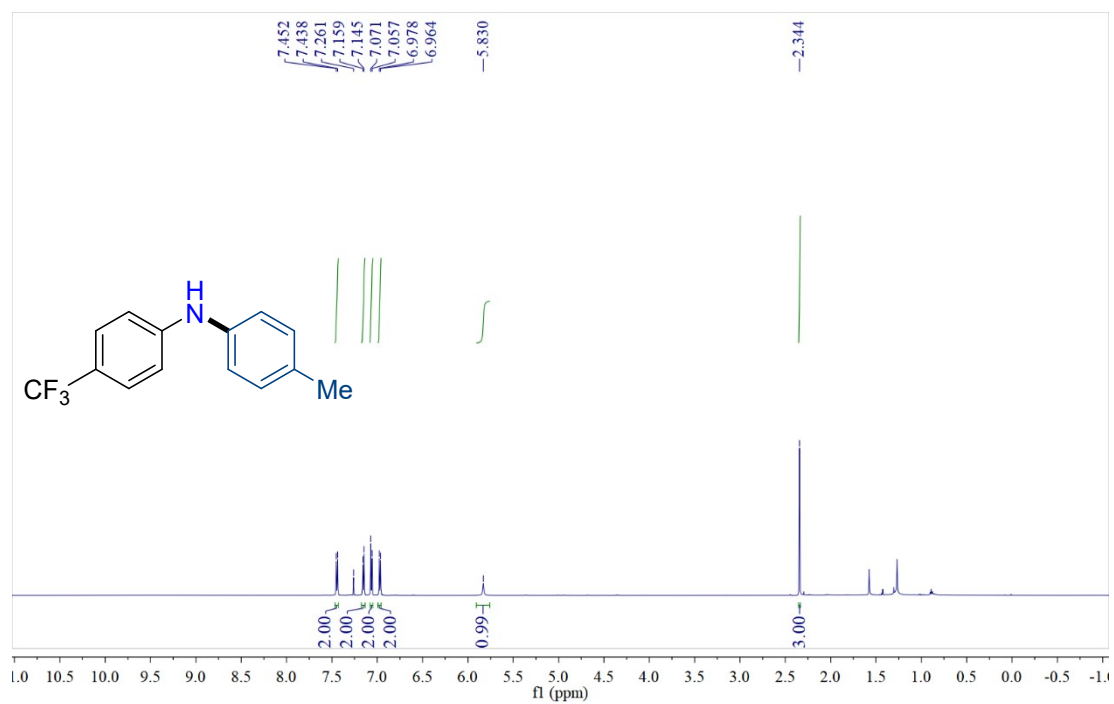

### $^{13}\text{C}$ NMR Spectrum of **4m**

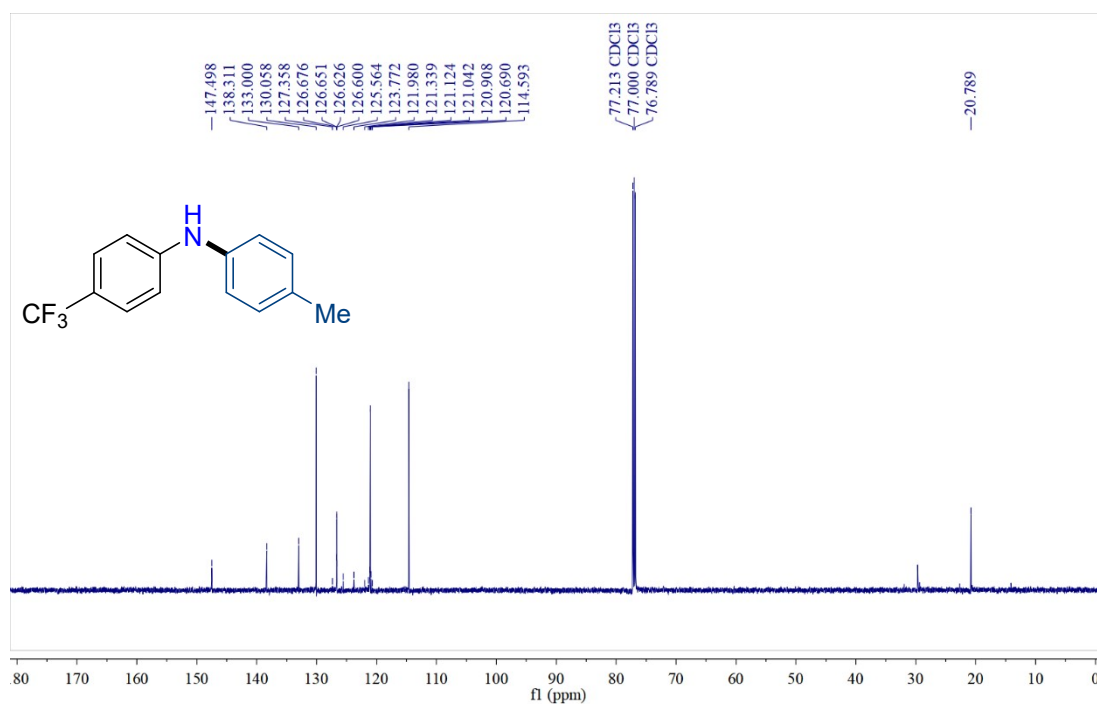

### $^{19}\text{F}$ NMR Spectrum of **4m**

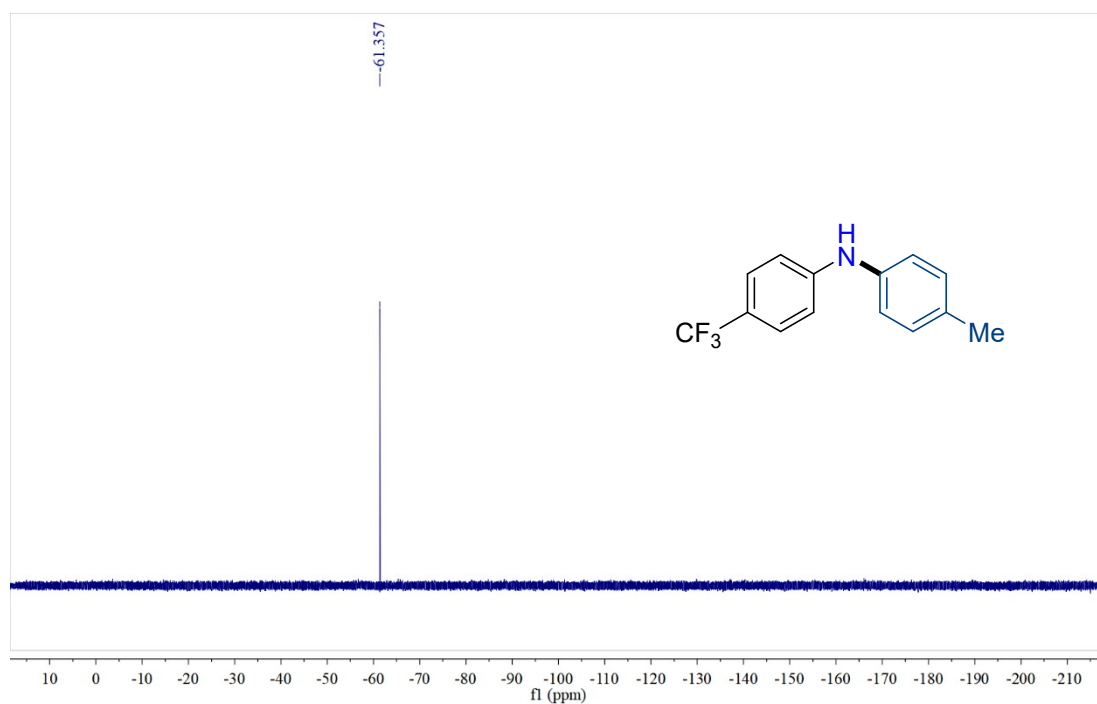

### <sup>1</sup>H NMR Spectrum of **4n**

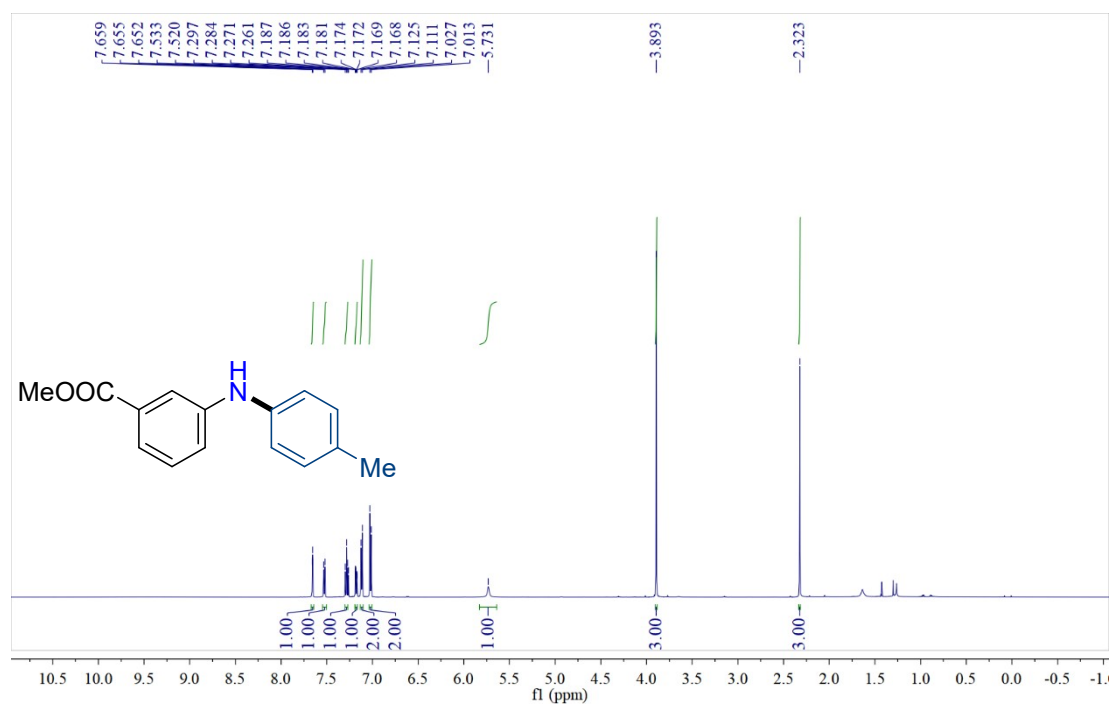

### <sup>13</sup>C NMR Spectrum of **4n**

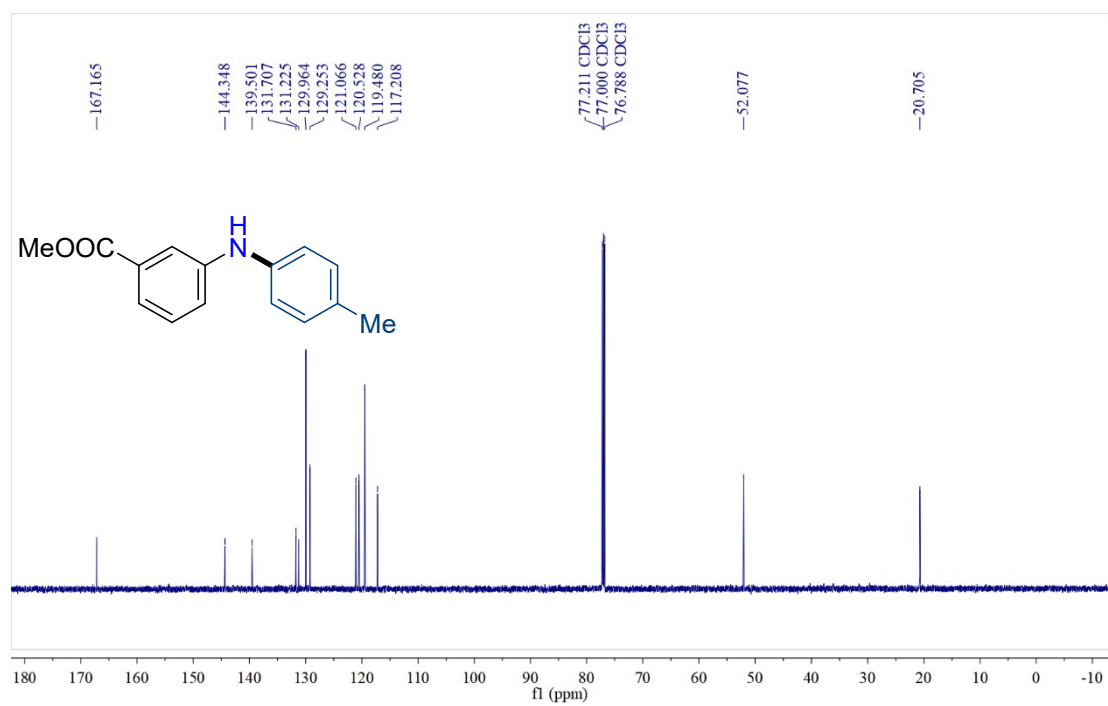

### <sup>1</sup>H NMR Spectrum of **4o**

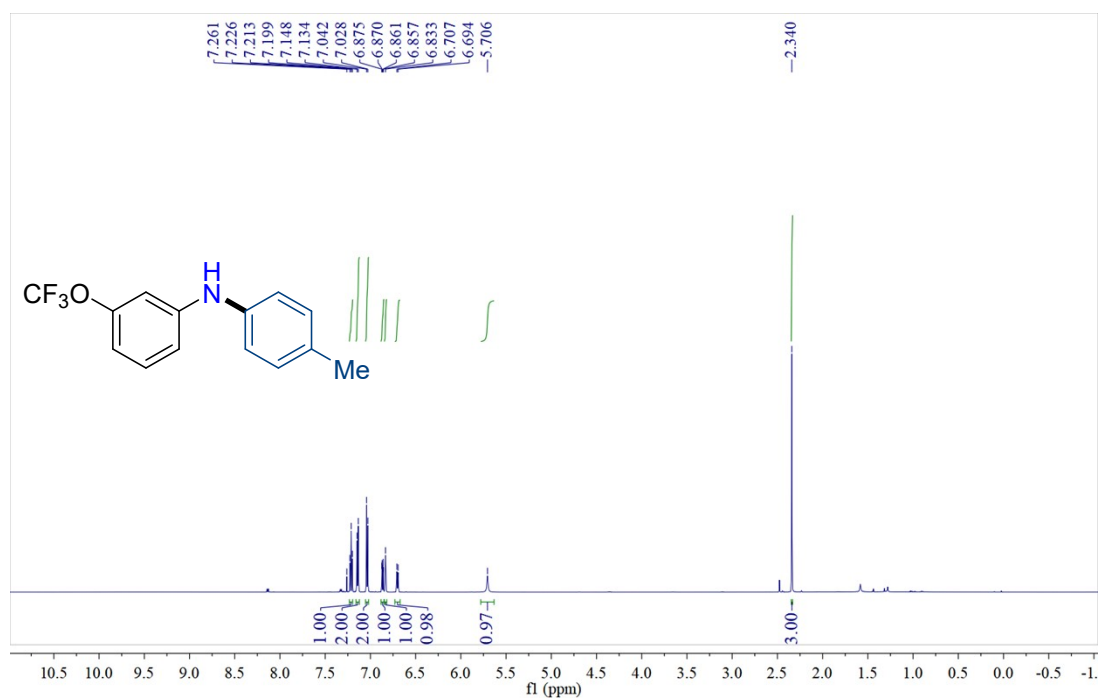

### <sup>13</sup>C NMR Spectrum of **4o**

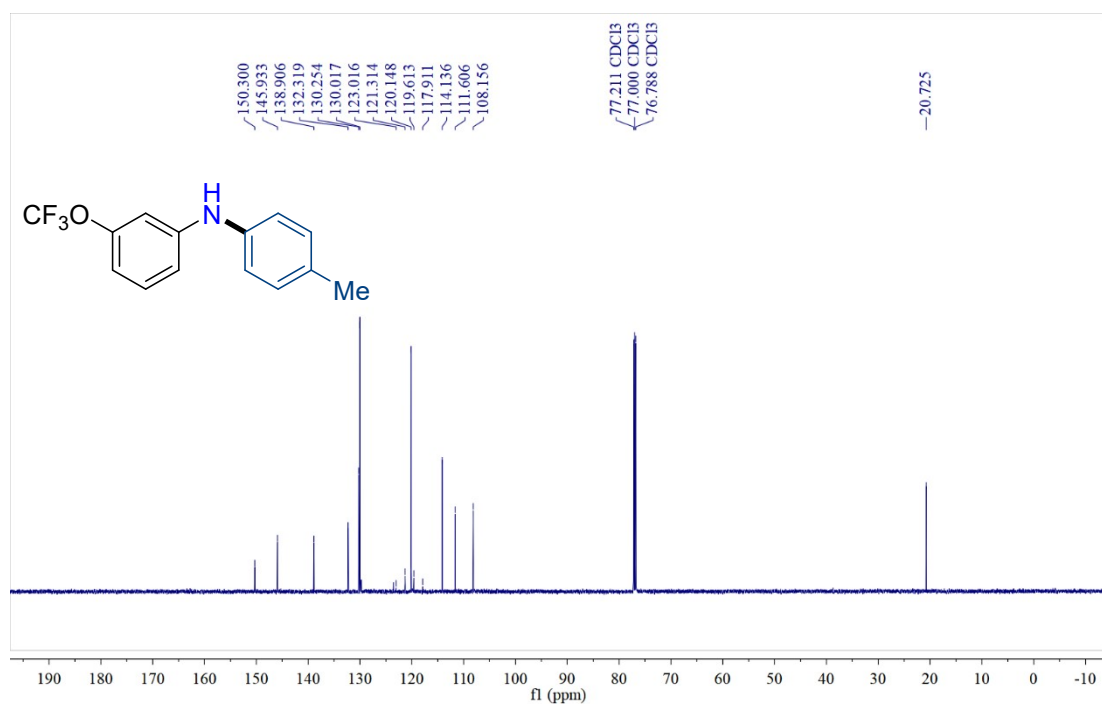



### <sup>19</sup>F NMR Spectrum of **4o**

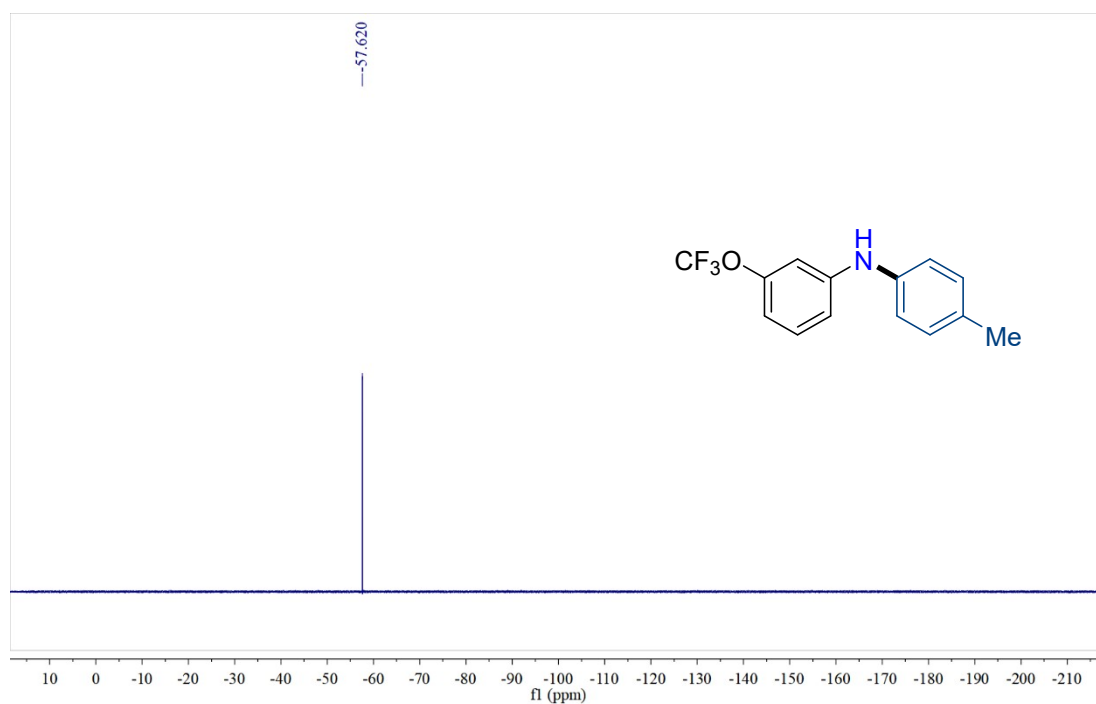

### <sup>1</sup>H NMR Spectrum of **4p**

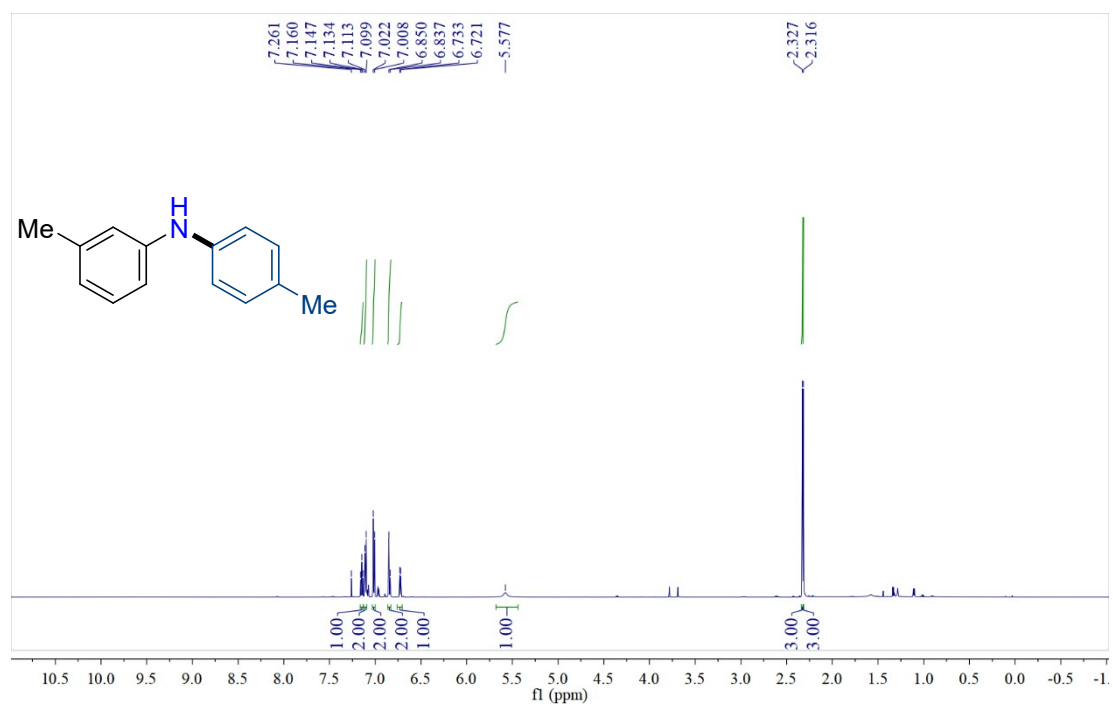

### <sup>13</sup>C NMR Spectrum of **4p**

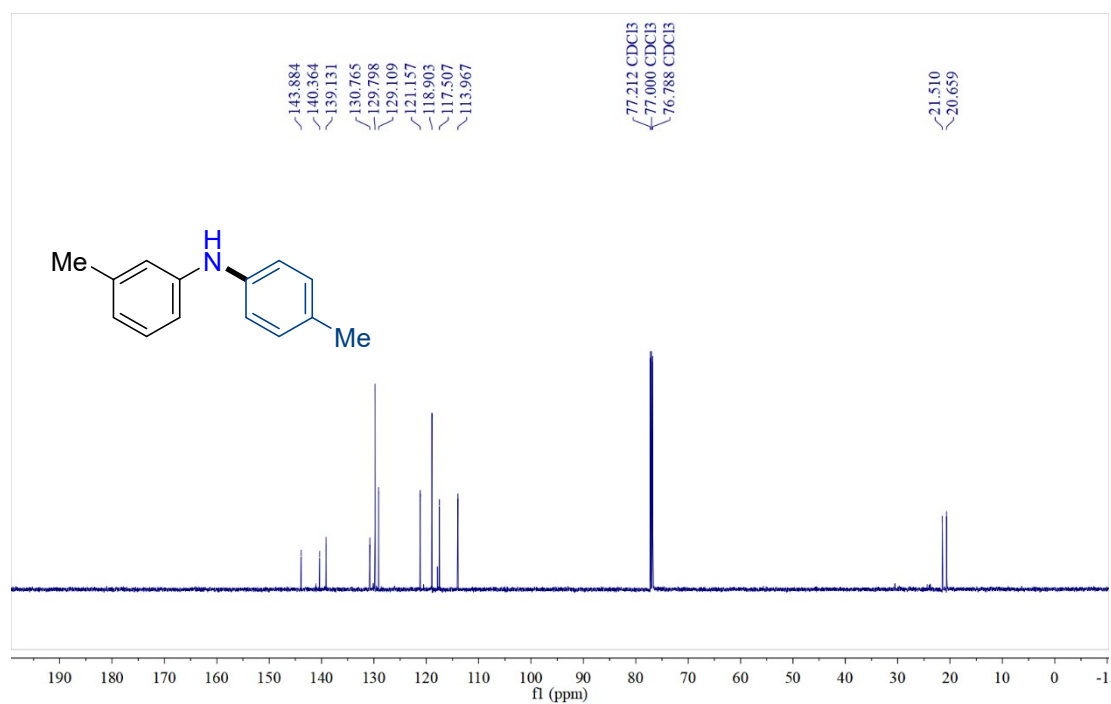

### <sup>1</sup>H NMR Spectrum of **4q**

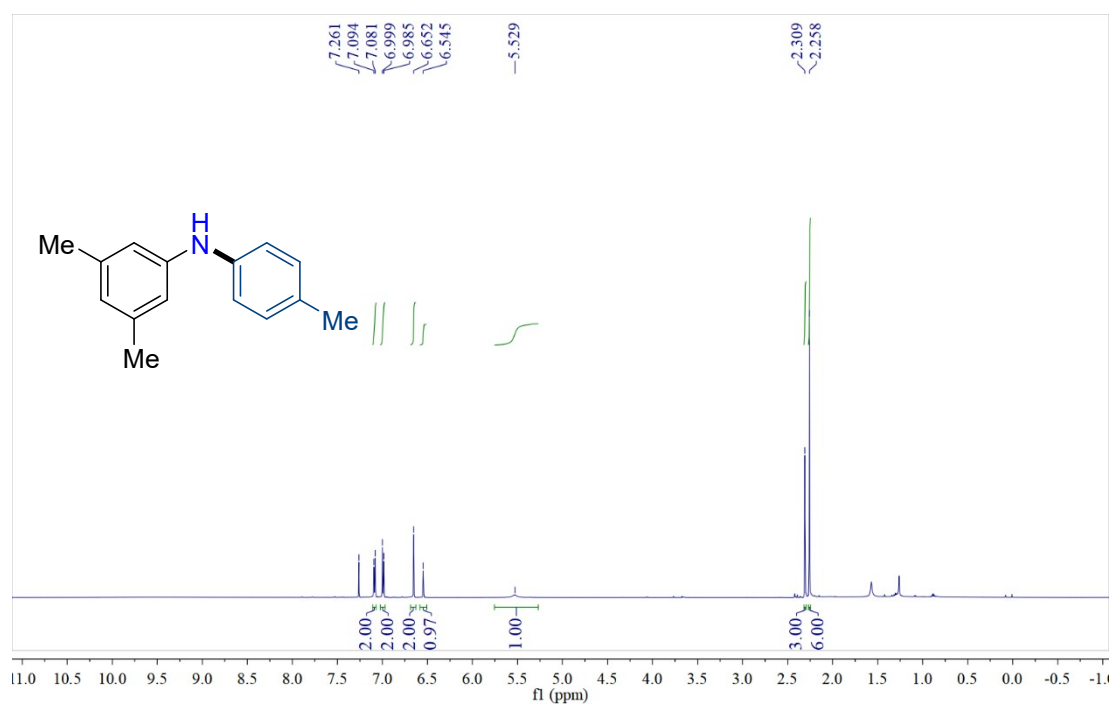

### <sup>13</sup>C NMR Spectrum of **4q**

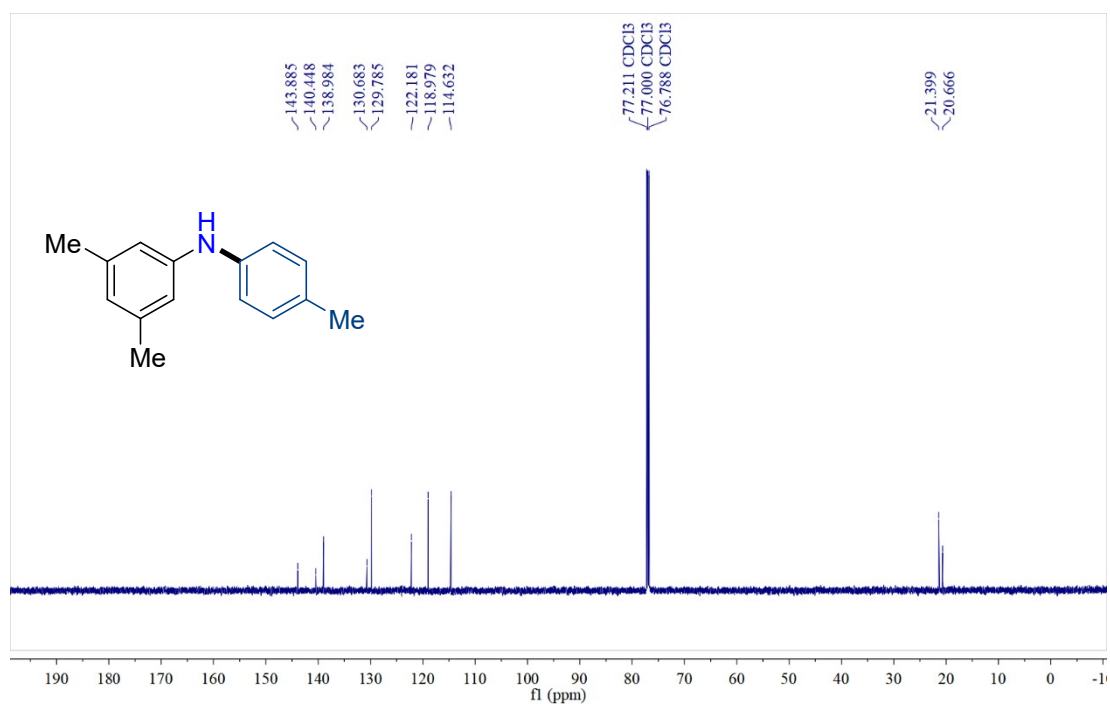

### <sup>1</sup>H NMR Spectrum of **4r**

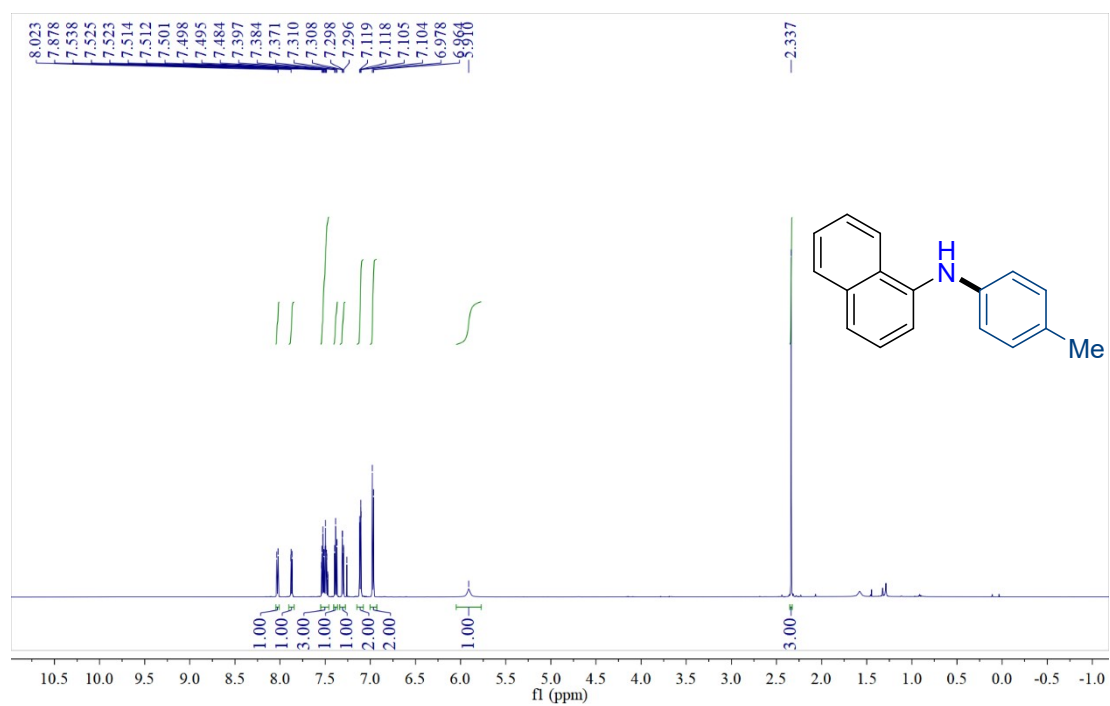

### <sup>13</sup>C NMR Spectrum of **4r**

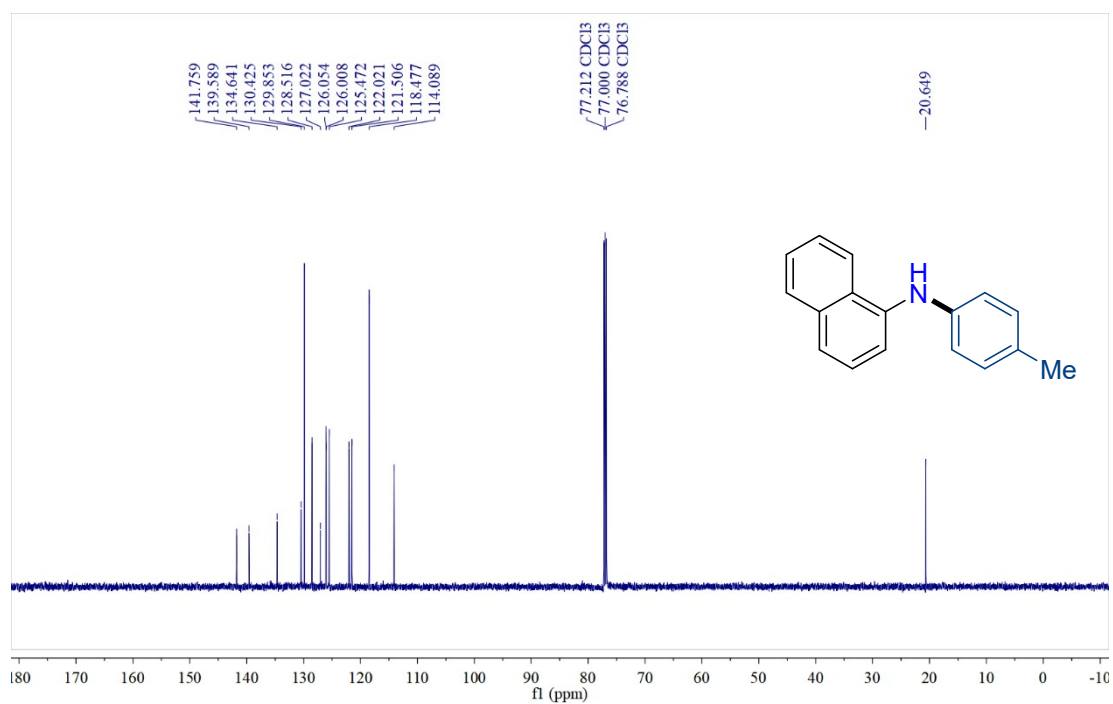

### <sup>1</sup>H NMR Spectrum of **4s**

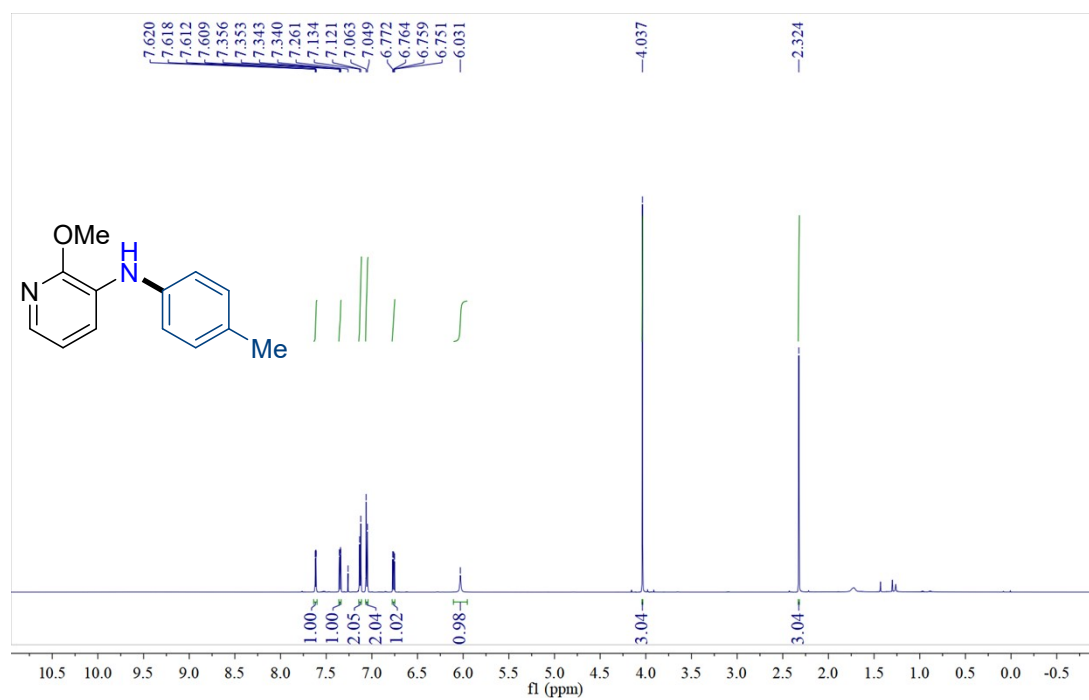

### <sup>13</sup>C NMR Spectrum of 4s

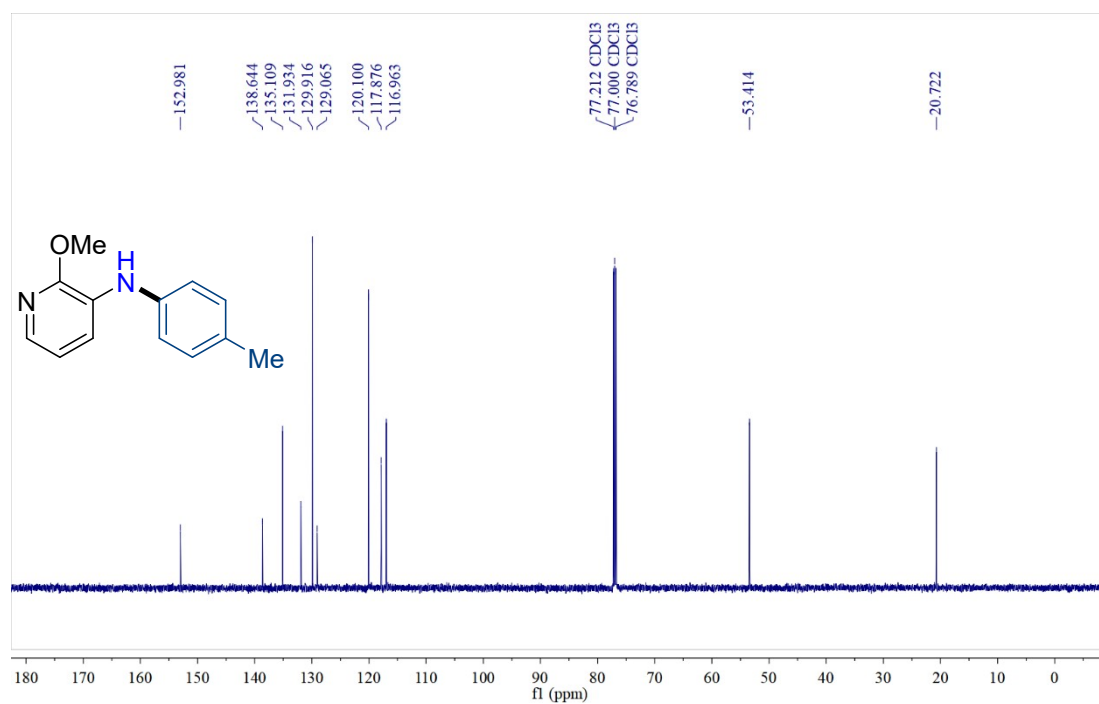

### <sup>1</sup>H NMR Spectrum of 4t

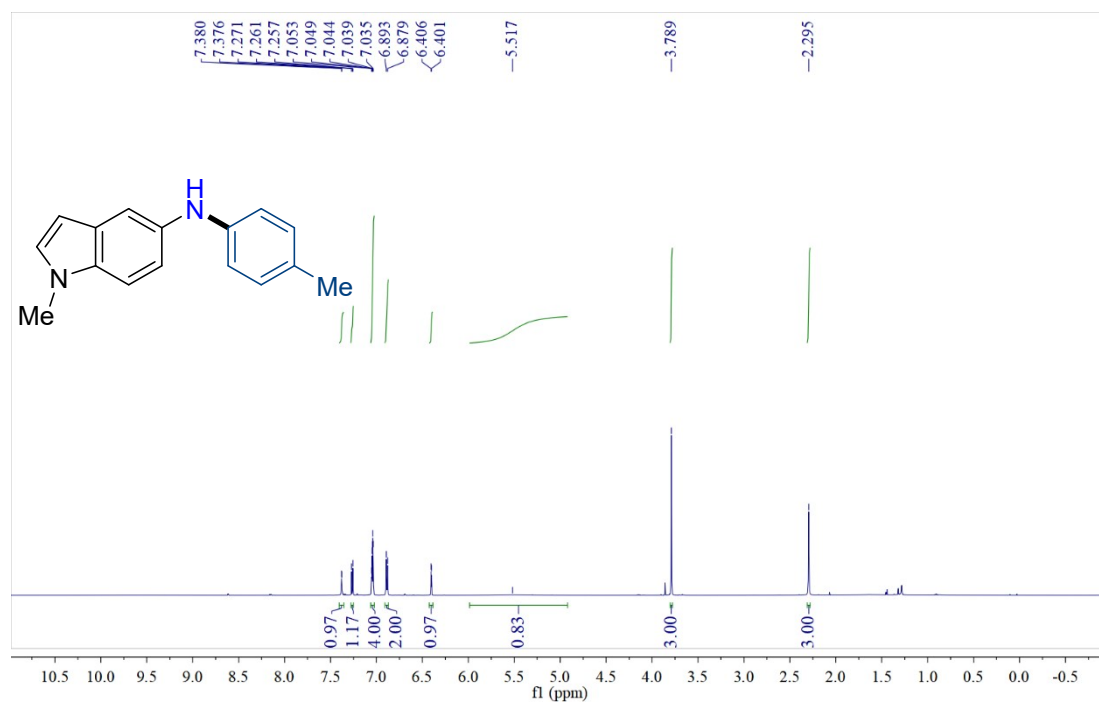

### <sup>13</sup>C NMR Spectrum of **4t**

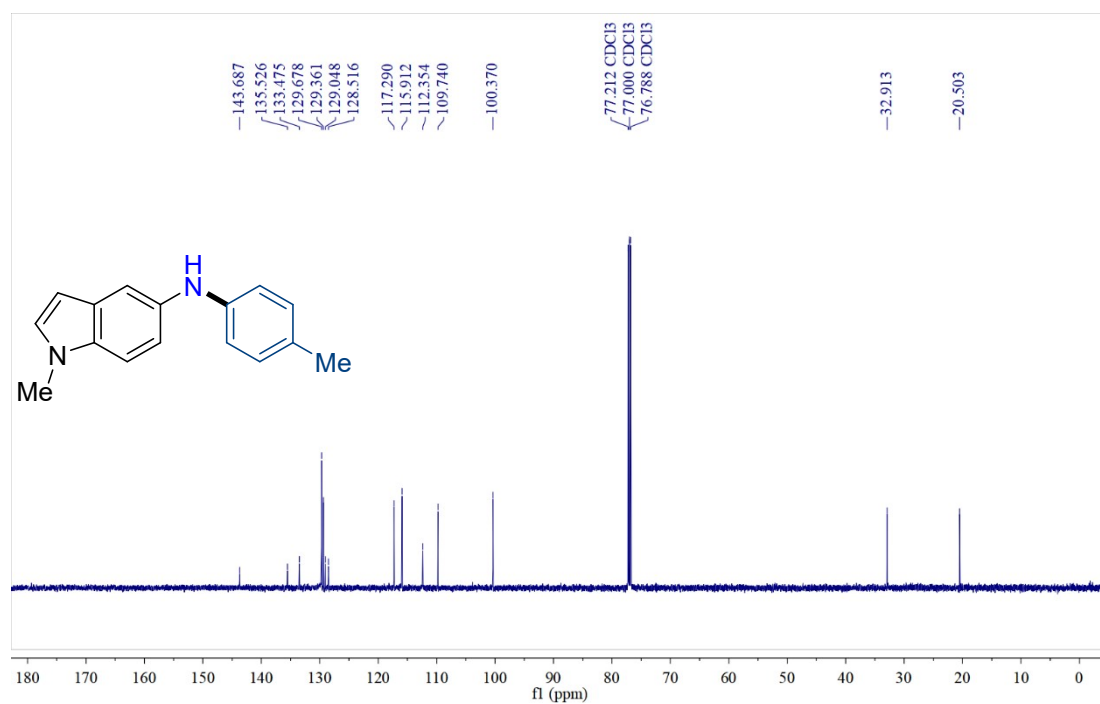

### <sup>1</sup>H NMR Spectrum of **4u**

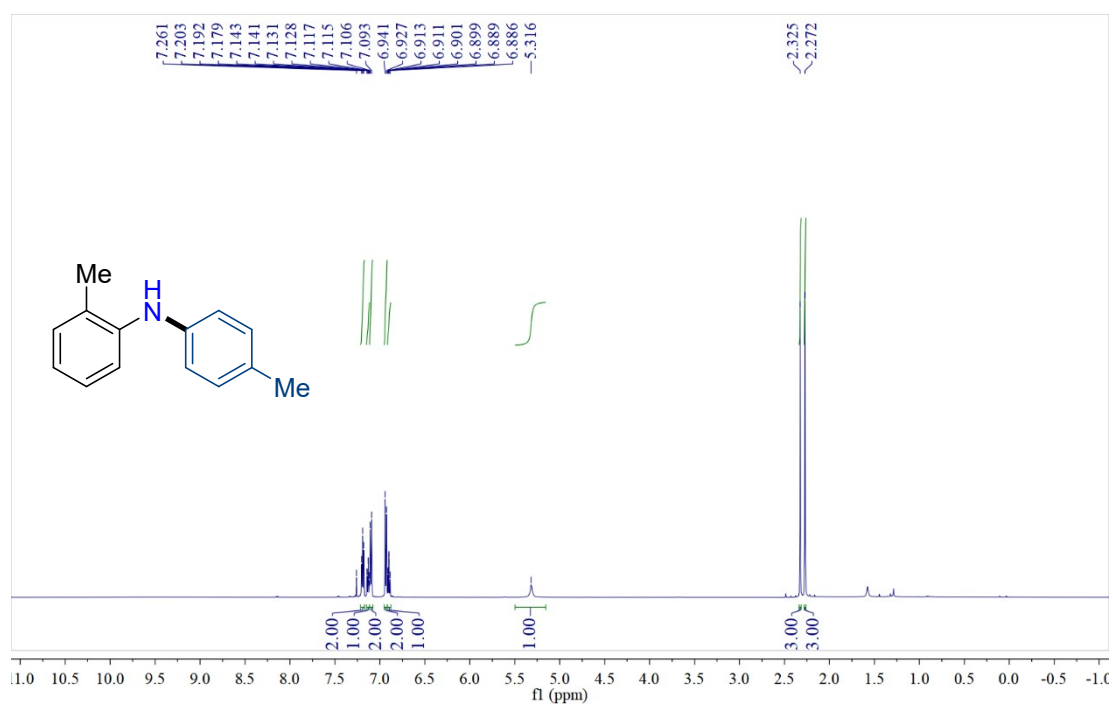

### <sup>13</sup>C NMR Spectrum of **4u**

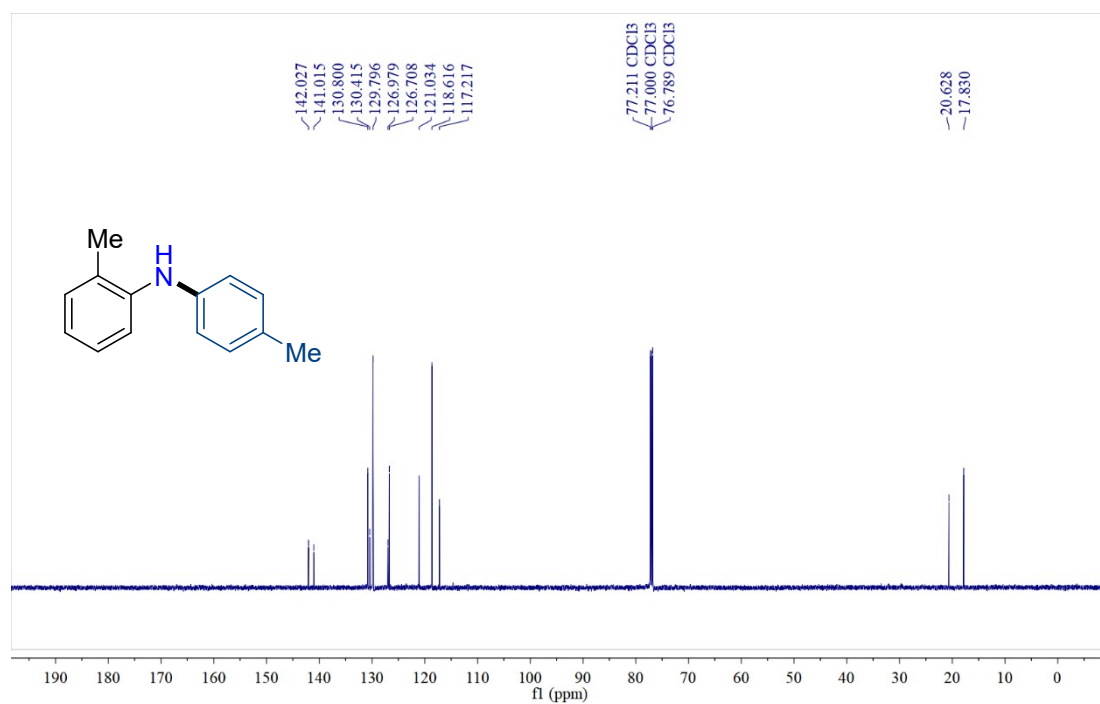

### <sup>1</sup>H NMR Spectrum of **5a**

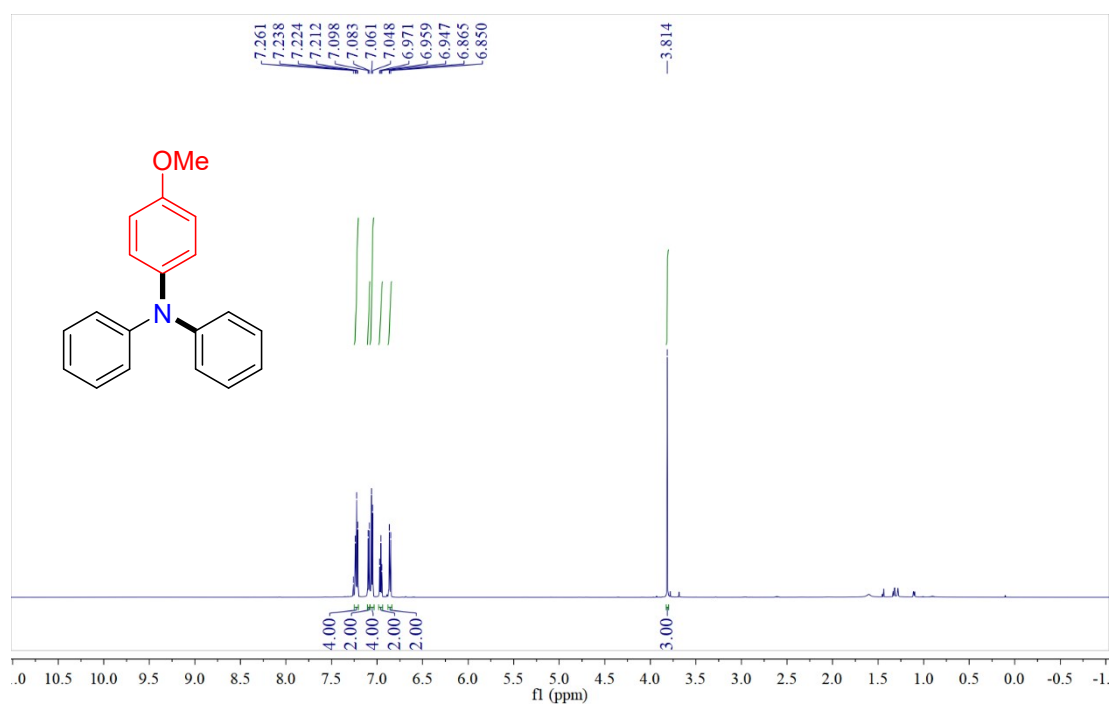

### <sup>13</sup>C NMR Spectrum of **5a**

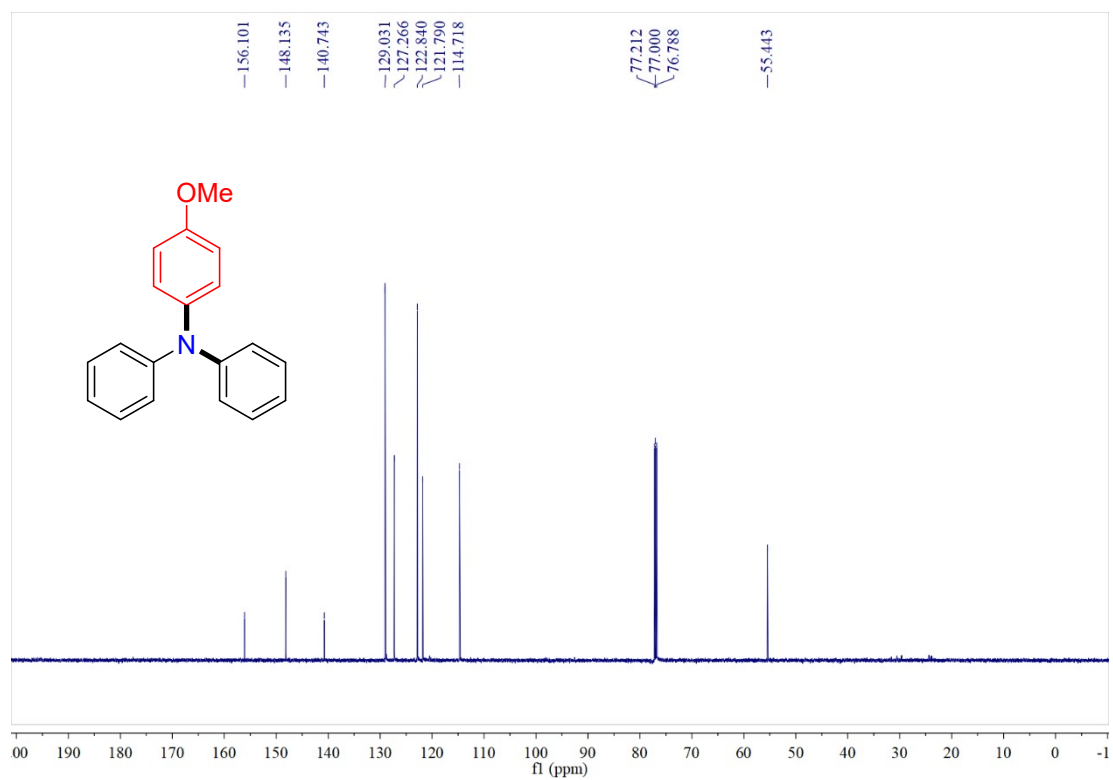

### <sup>1</sup>H NMR Spectrum of **5b**

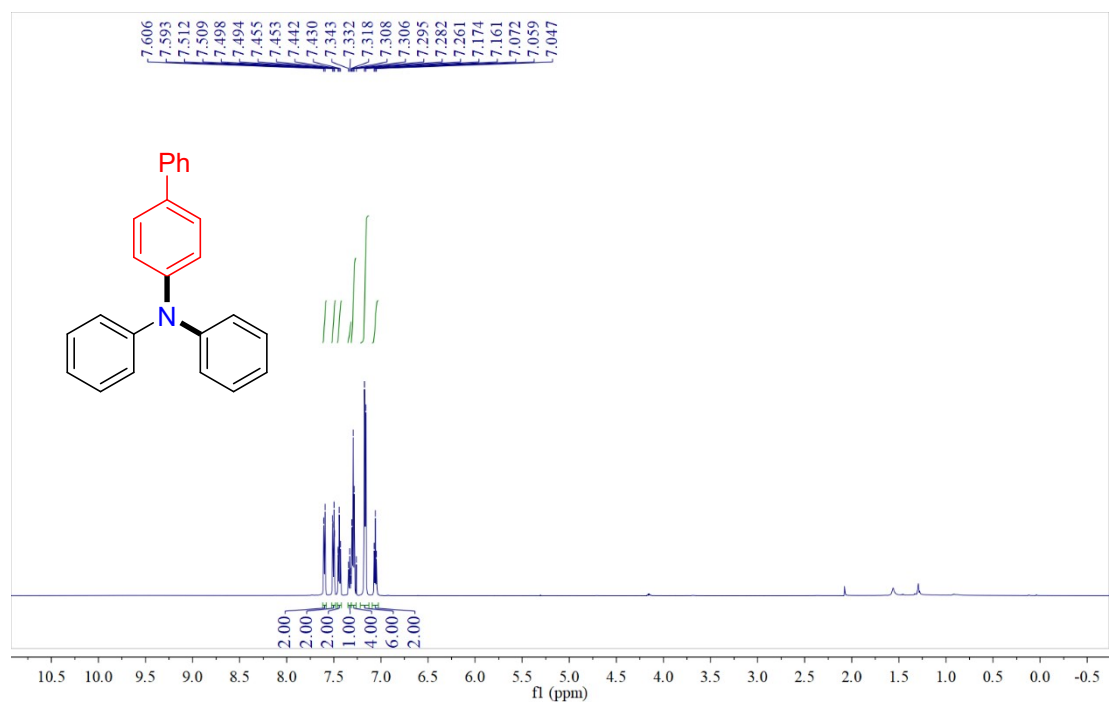



### $^{13}\text{C}$ NMR Spectrum of **5b**

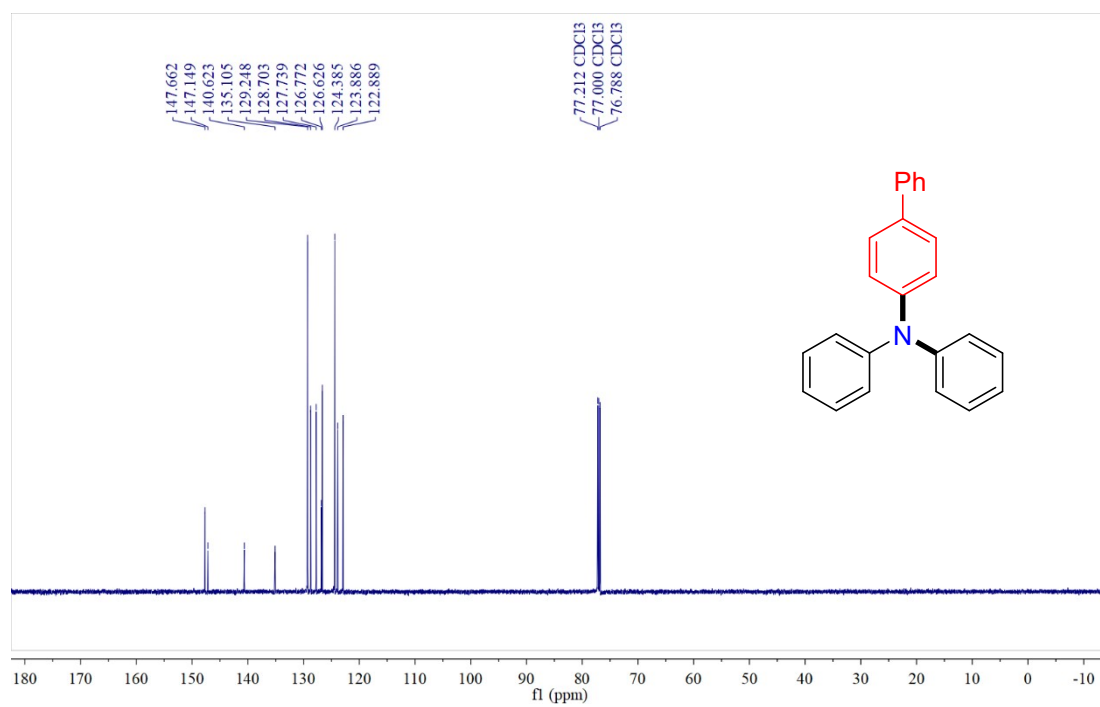

### $^1\text{H}$ NMR Spectrum of **5c**

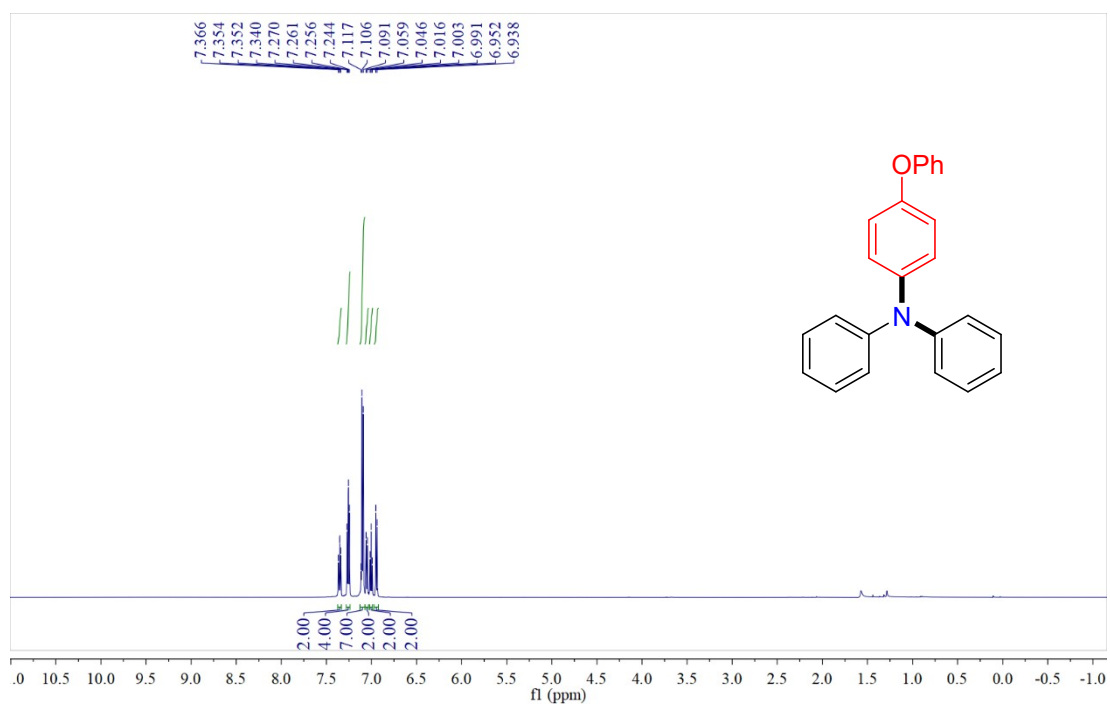

### $^{13}\text{C}$ NMR Spectrum of **5c**

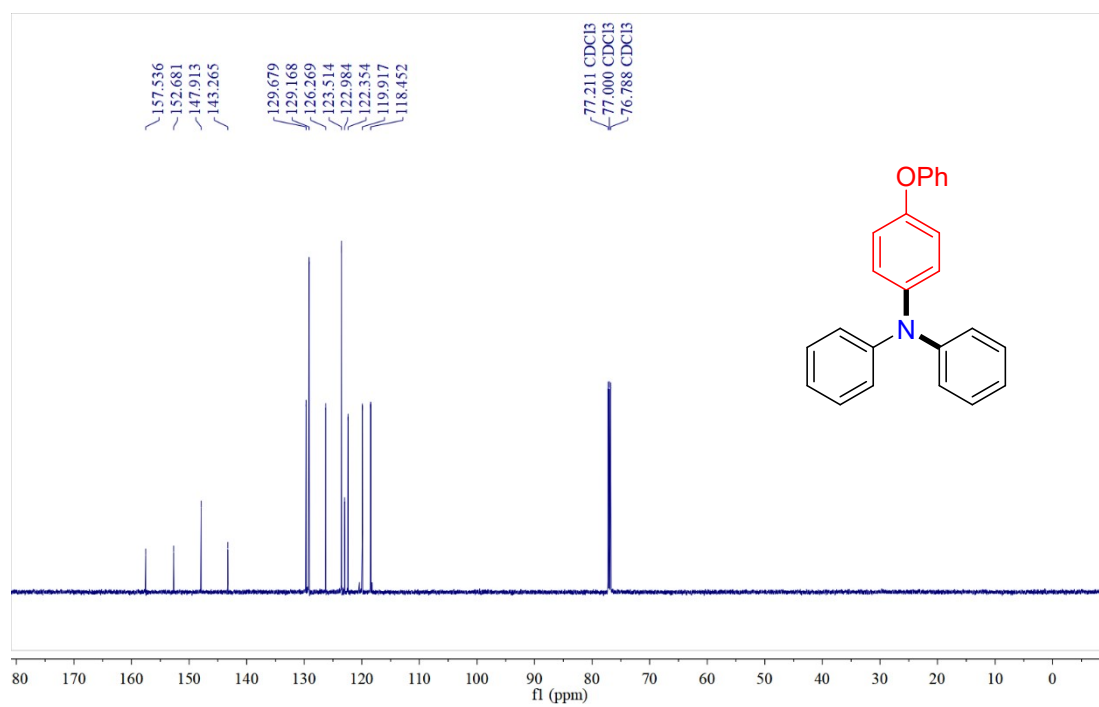

### $^1\text{H}$ NMR Spectrum of **5d**

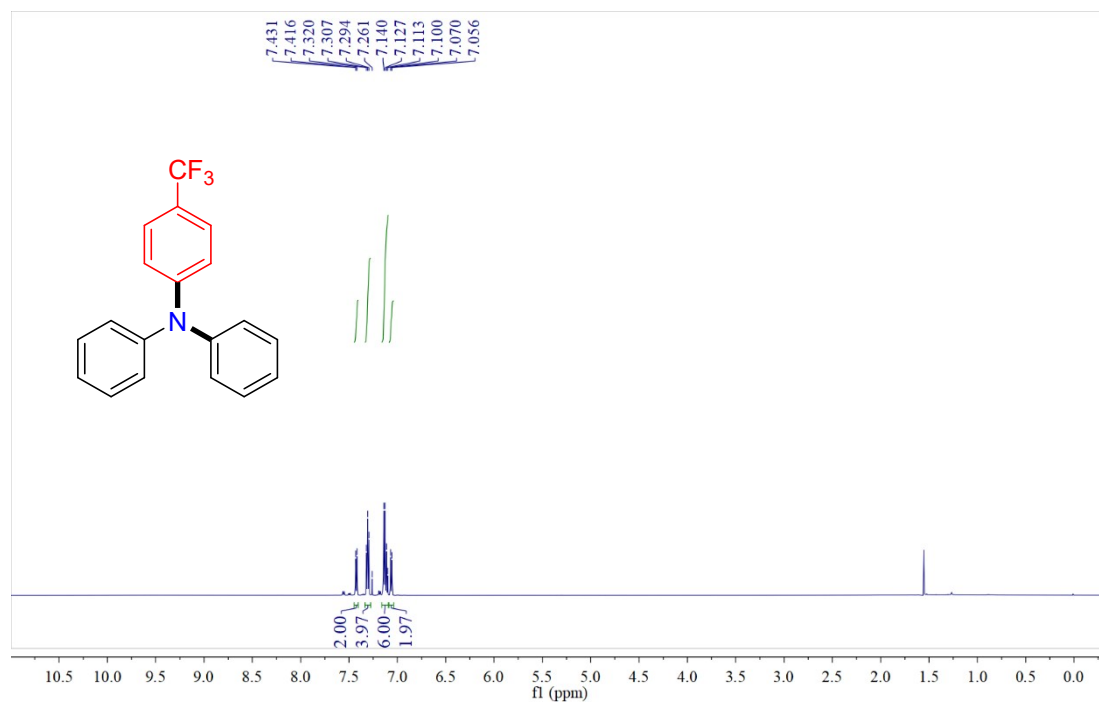

### <sup>13</sup>C NMR Spectrum of **5d**

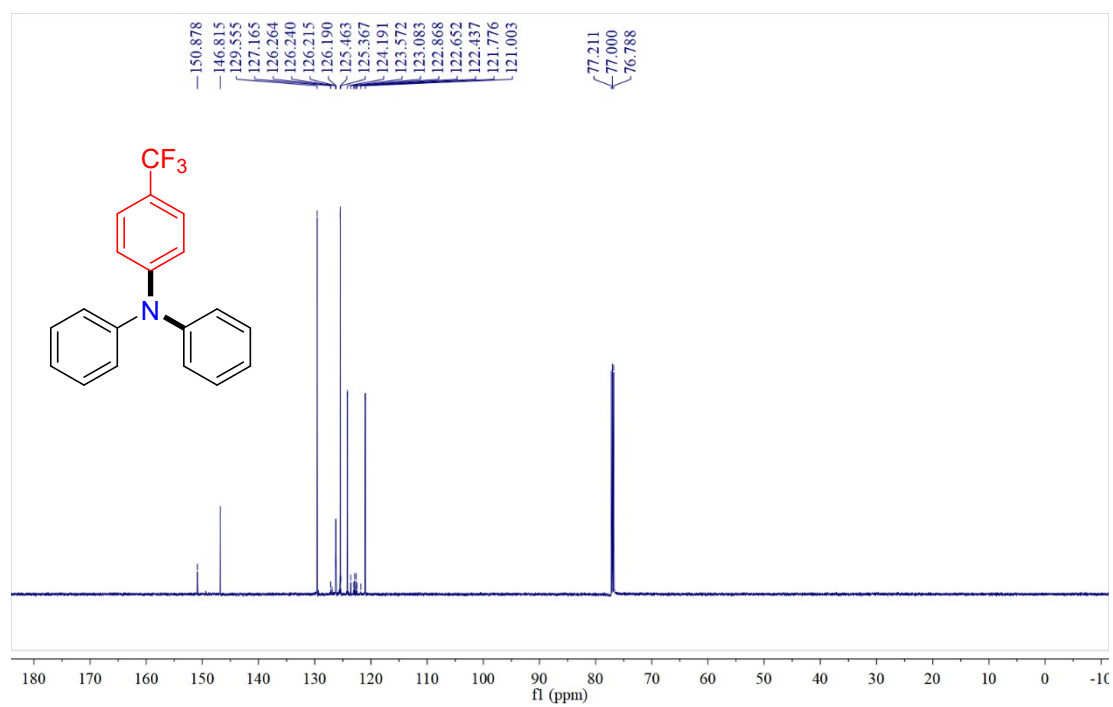

### <sup>19</sup>F NMR Spectrum of **5d**

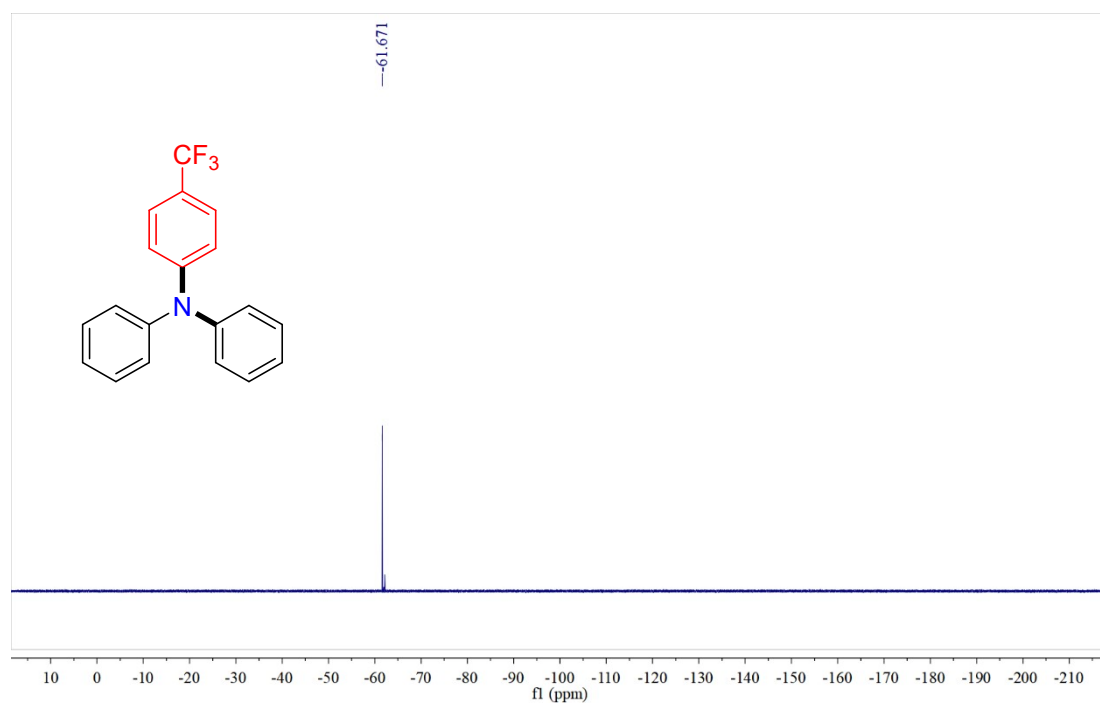

### <sup>1</sup>H NMR Spectrum of **5e**

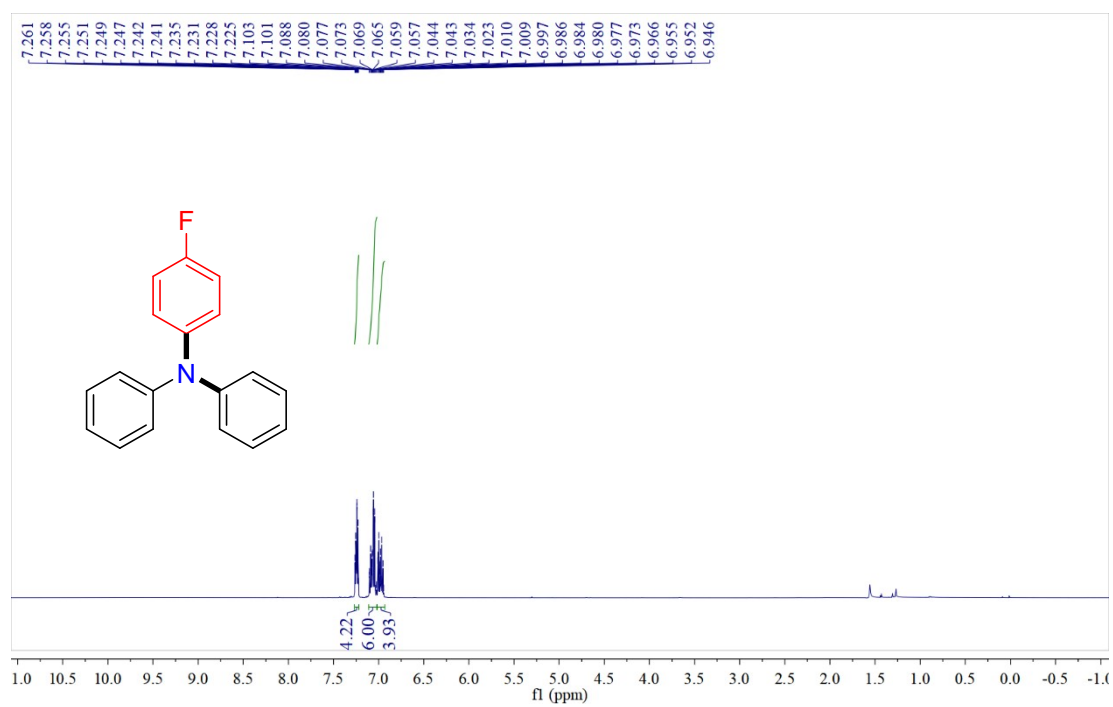

### <sup>13</sup>C NMR Spectrum of **5e**

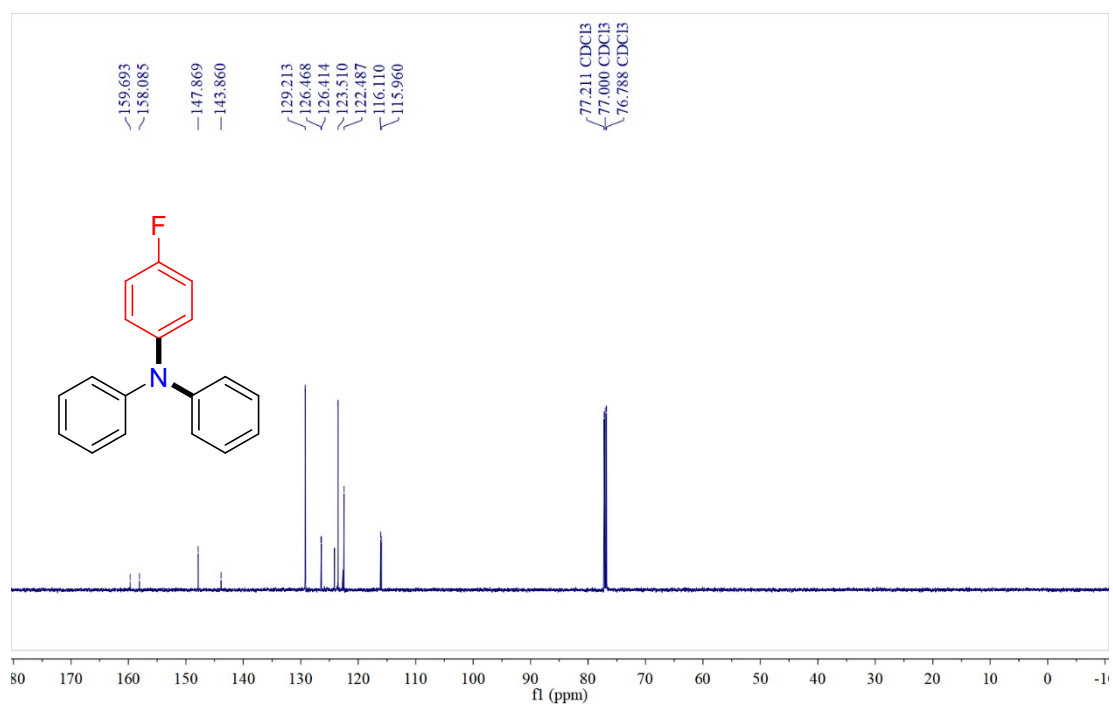

### $^{19}\text{F}$ NMR Spectrum of **5e**

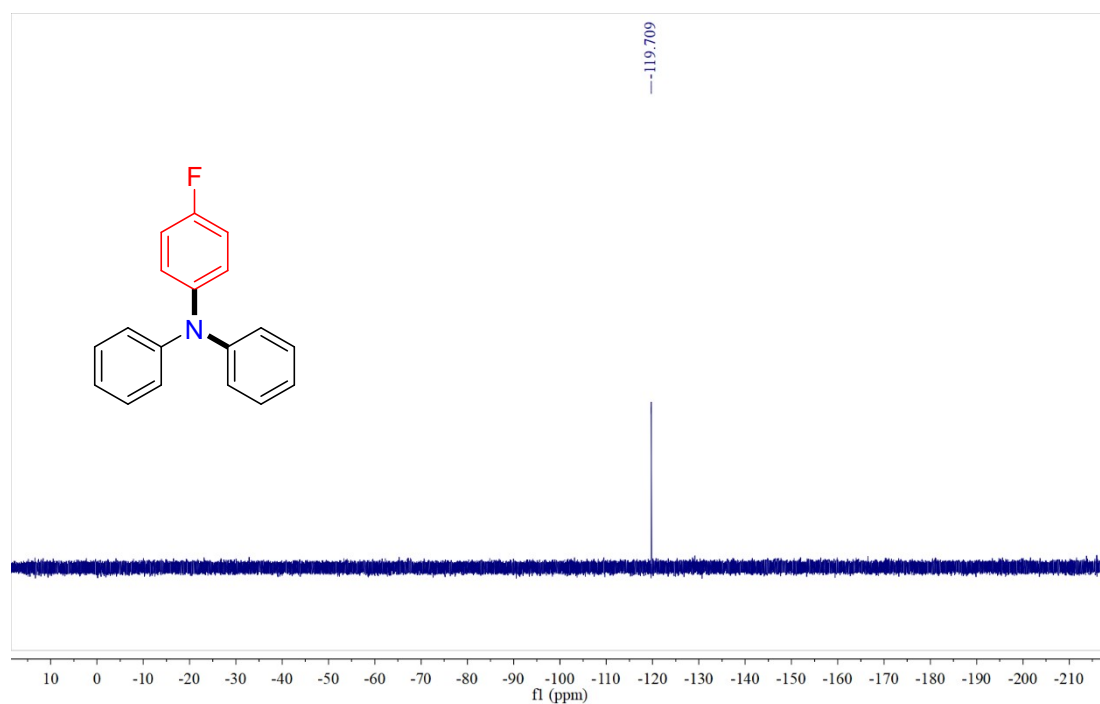

### $^1\text{H}$ NMR Spectrum of **5f**

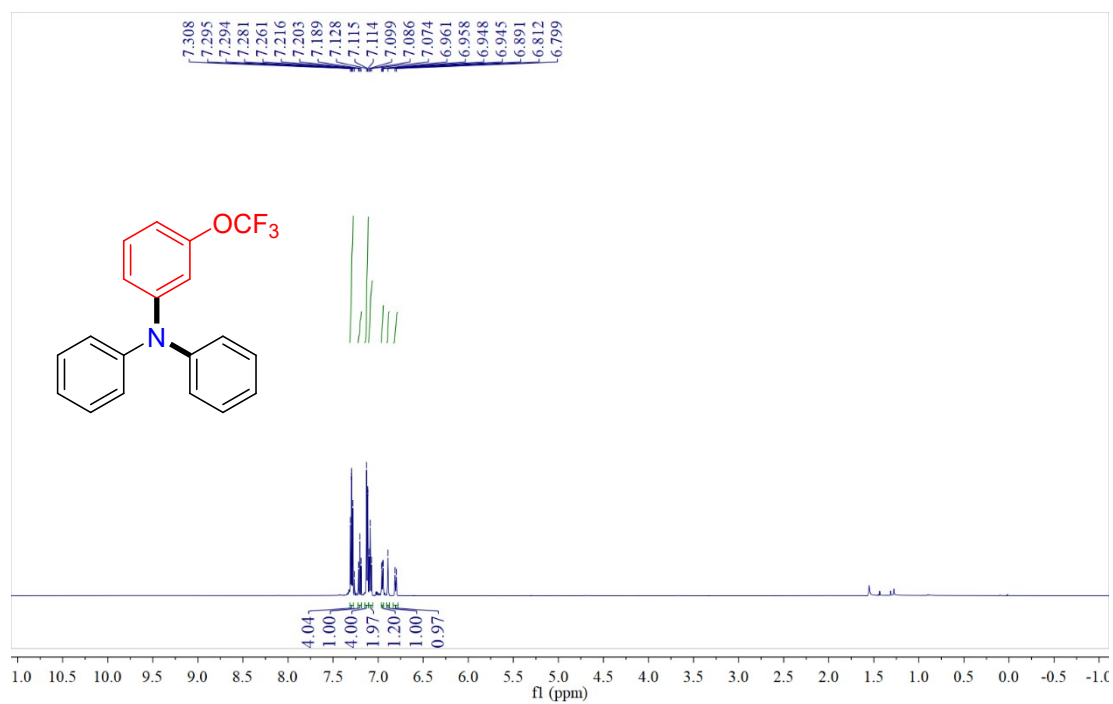

### <sup>13</sup>C NMR Spectrum of **5f**

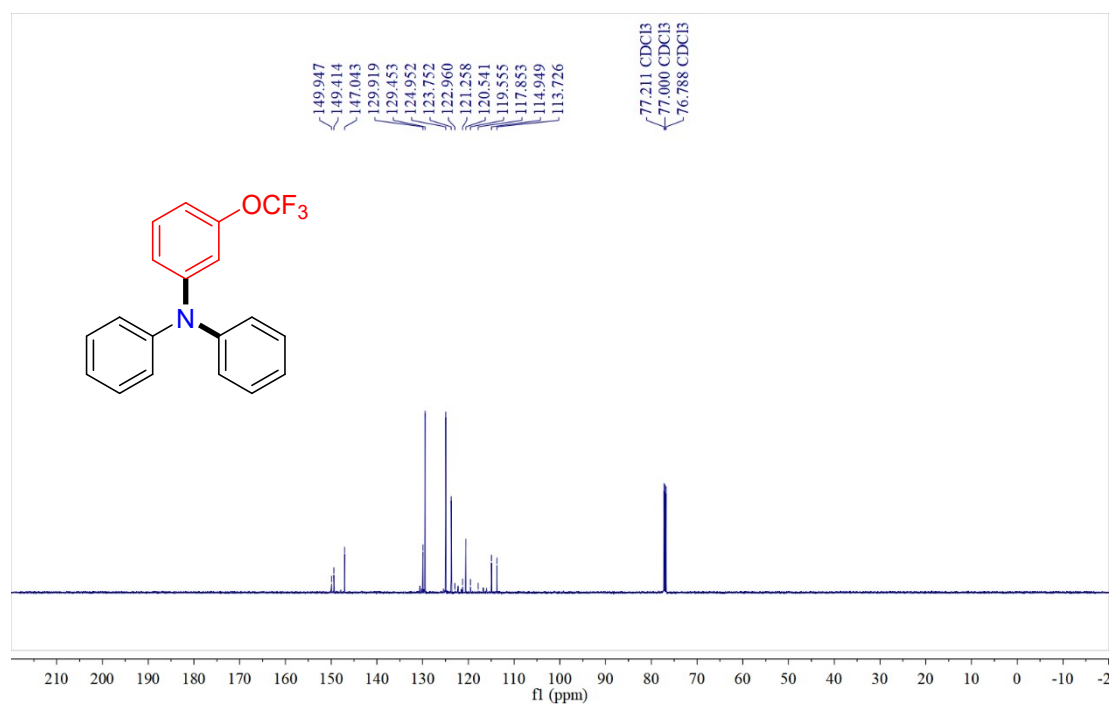

### <sup>19</sup>F NMR Spectrum of **5f**

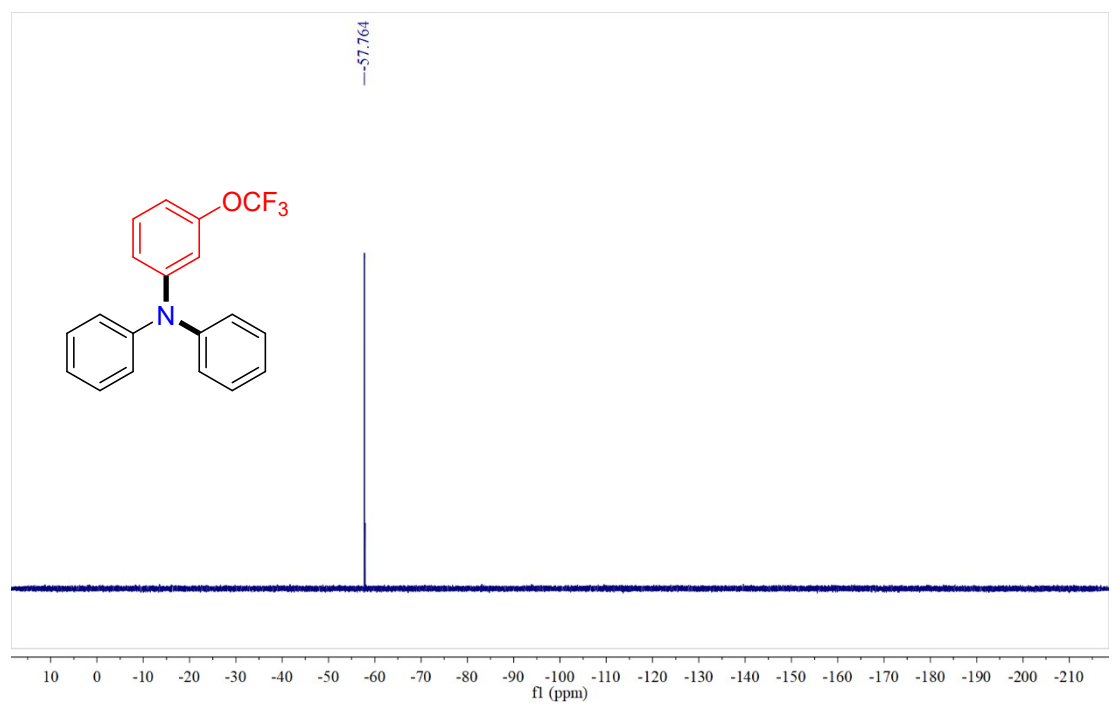

### <sup>1</sup>H NMR Spectrum of **5g**

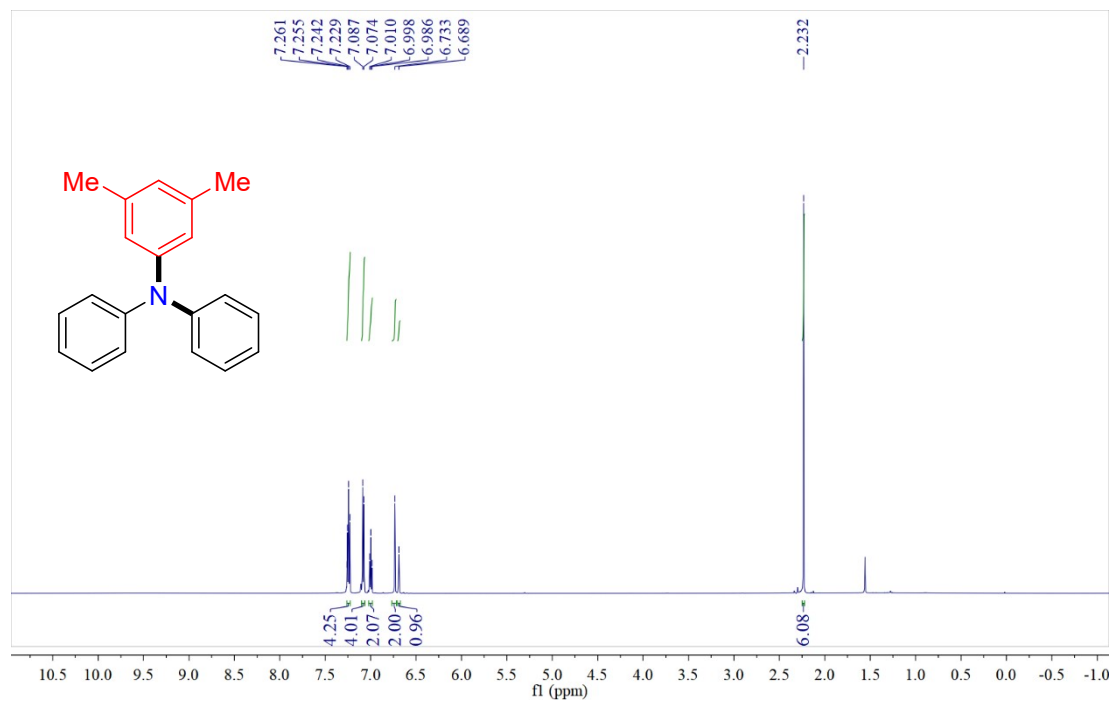

### <sup>13</sup>C NMR Spectrum of **5g**

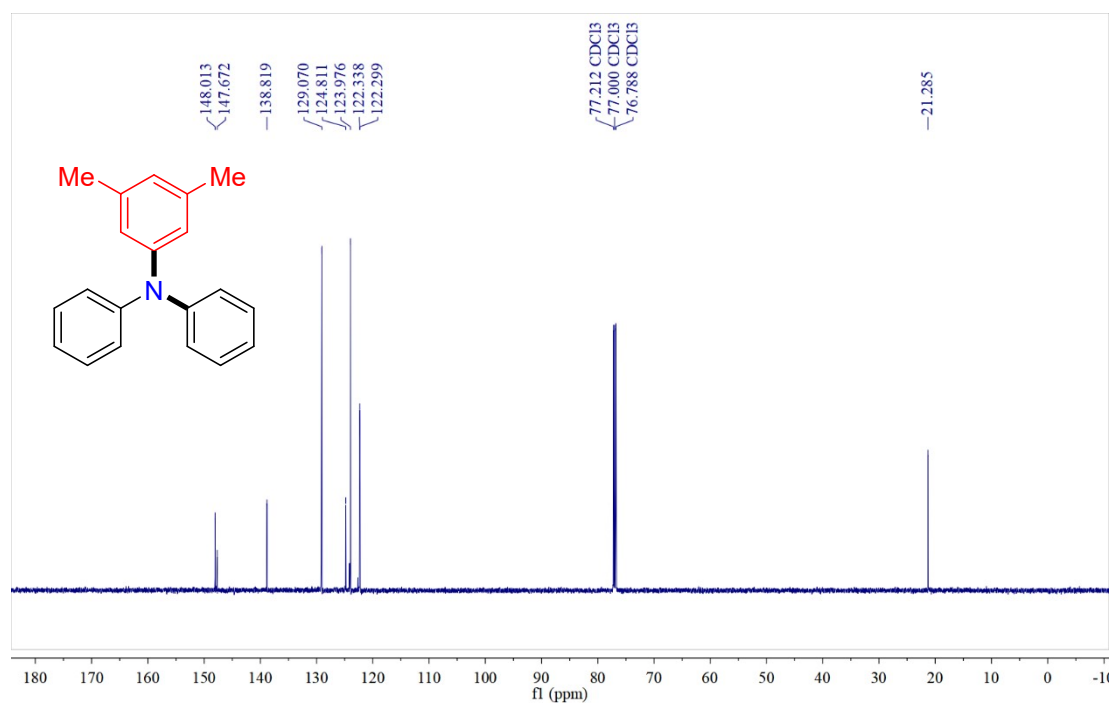

### <sup>1</sup>H NMR Spectrum of **5h**

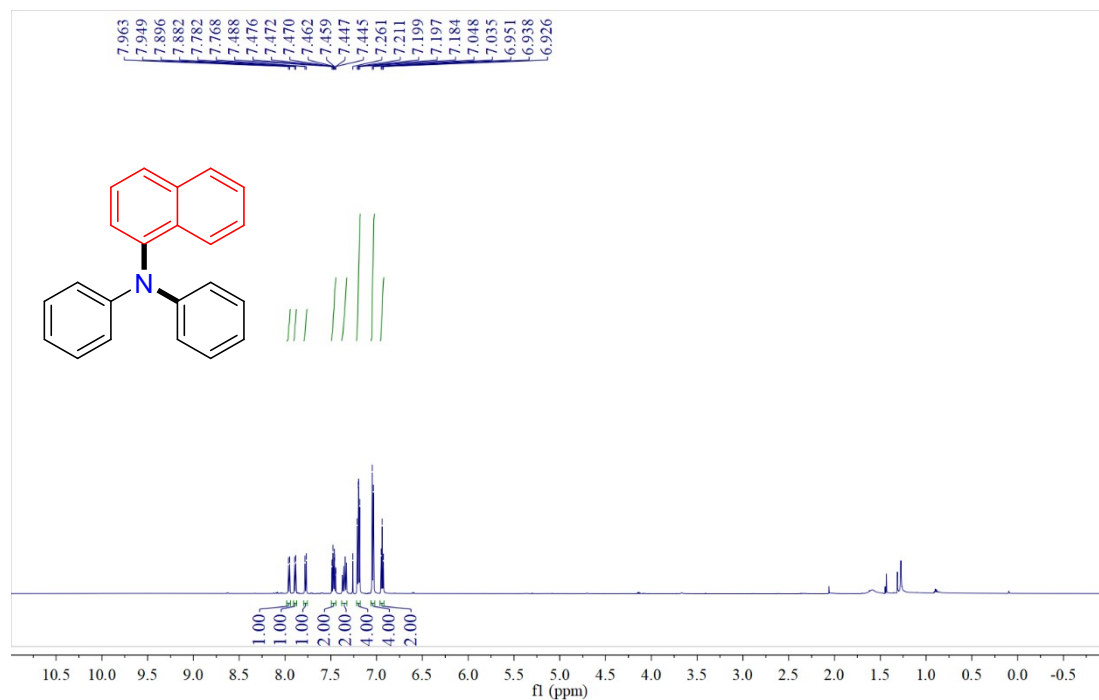

### <sup>13</sup>C NMR Spectrum of **5h**

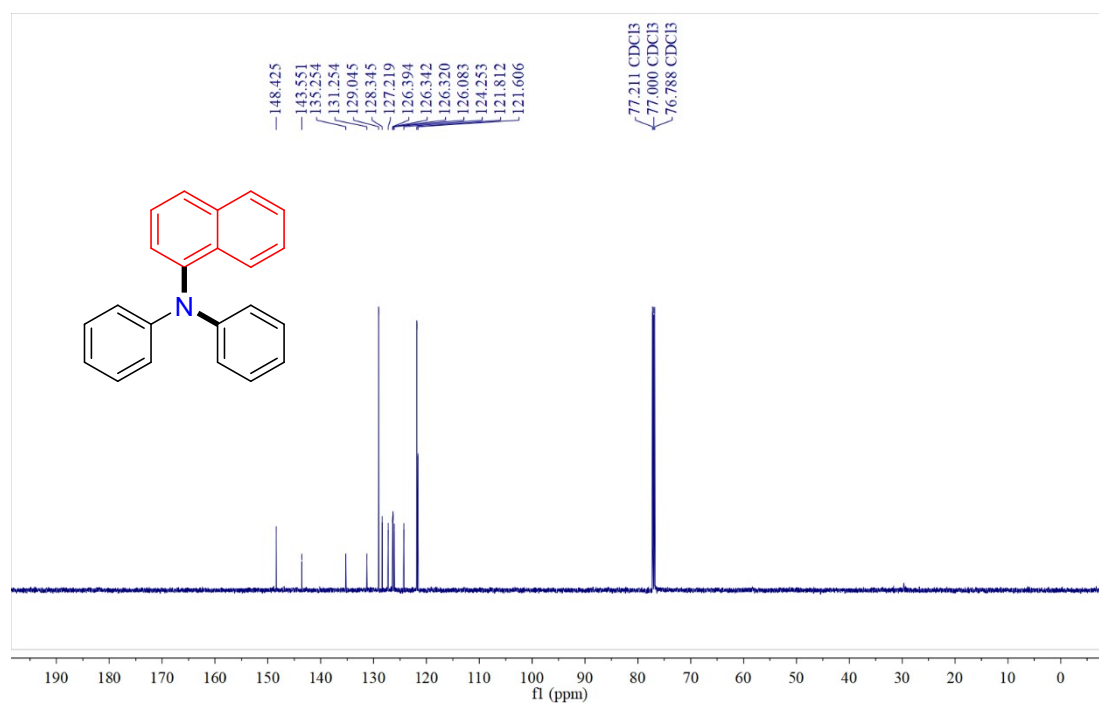



### <sup>1</sup>H NMR Spectrum of **5i**

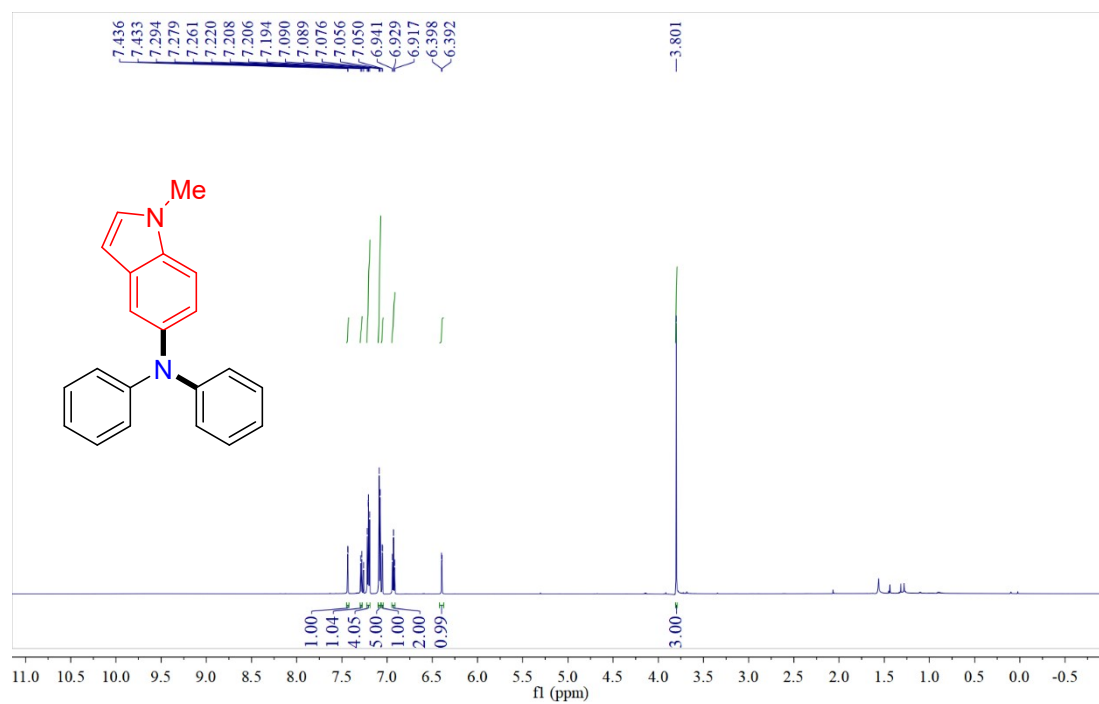

### <sup>13</sup>C NMR Spectrum of **5i**

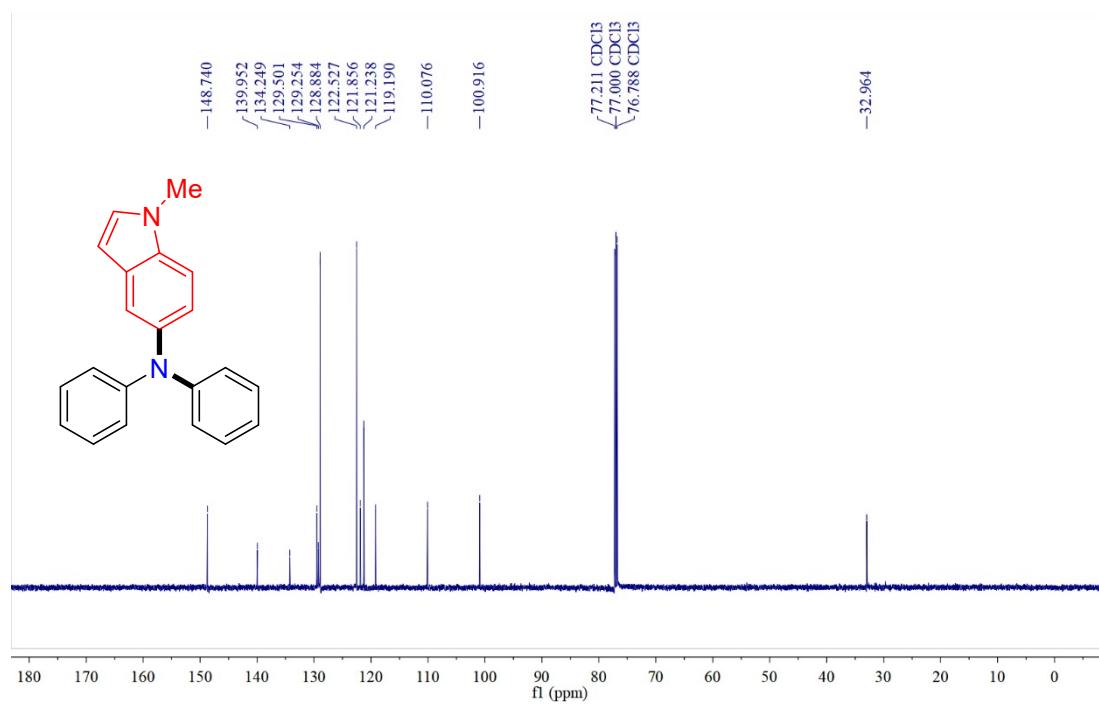

### <sup>1</sup>H NMR Spectrum of **5j**

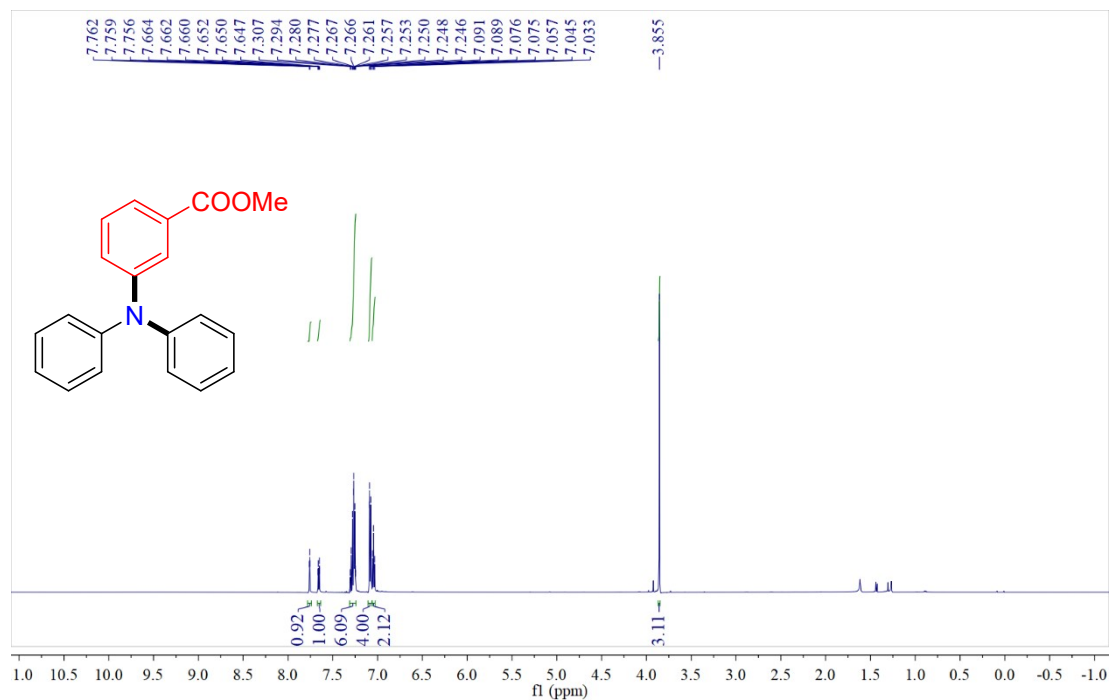

### <sup>13</sup>C NMR Spectrum of **5j**

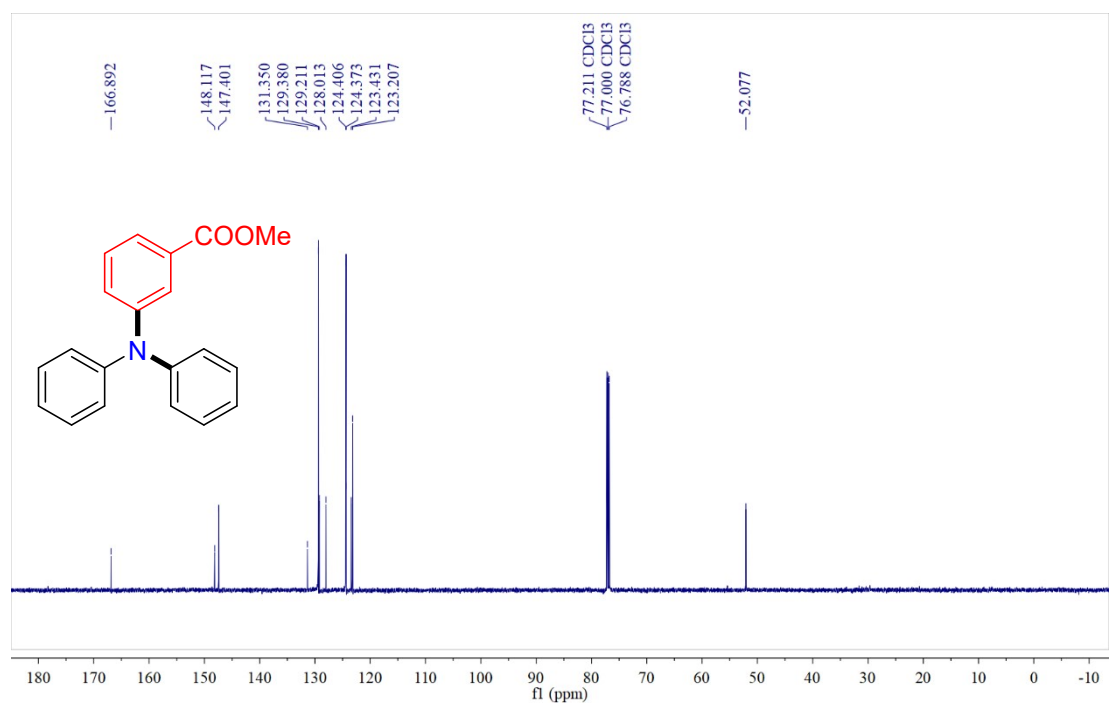

### <sup>1</sup>H NMR Spectrum of **5k**

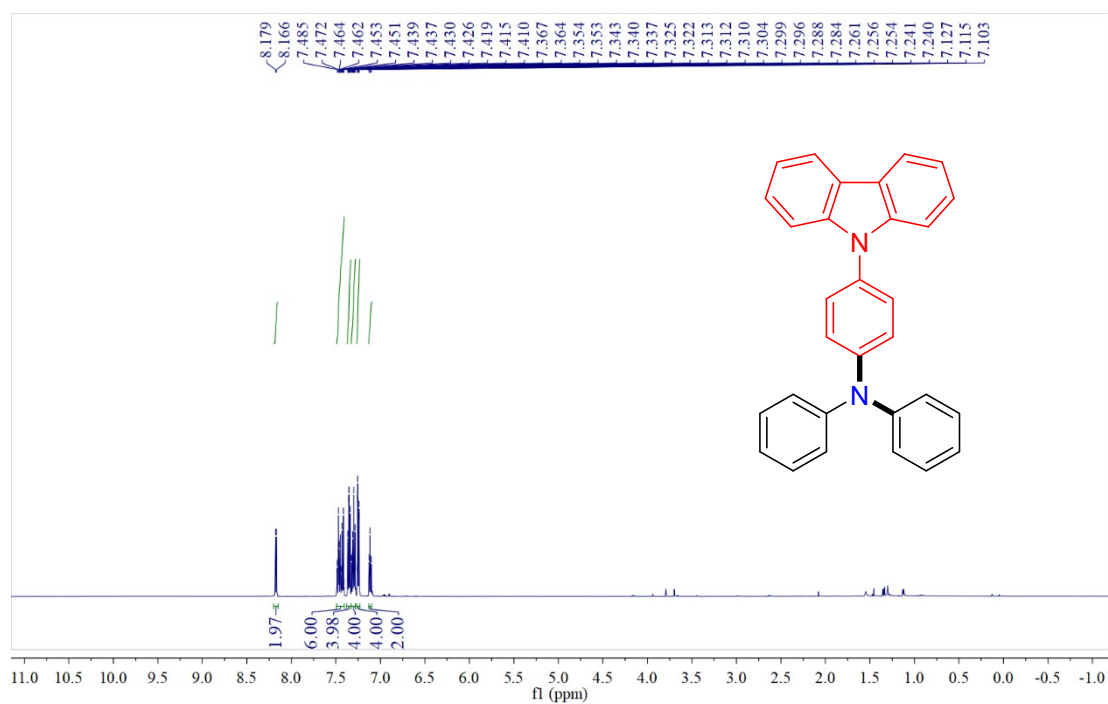

### <sup>13</sup>C NMR Spectrum of **5k**

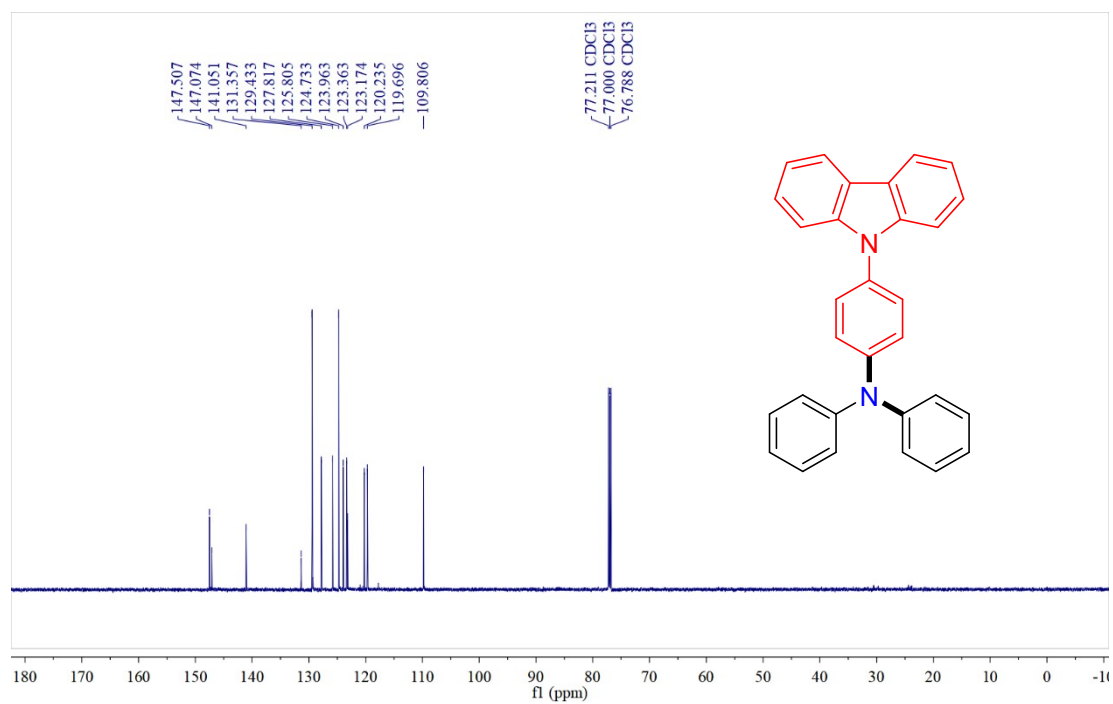

### <sup>1</sup>H NMR Spectrum of **51**

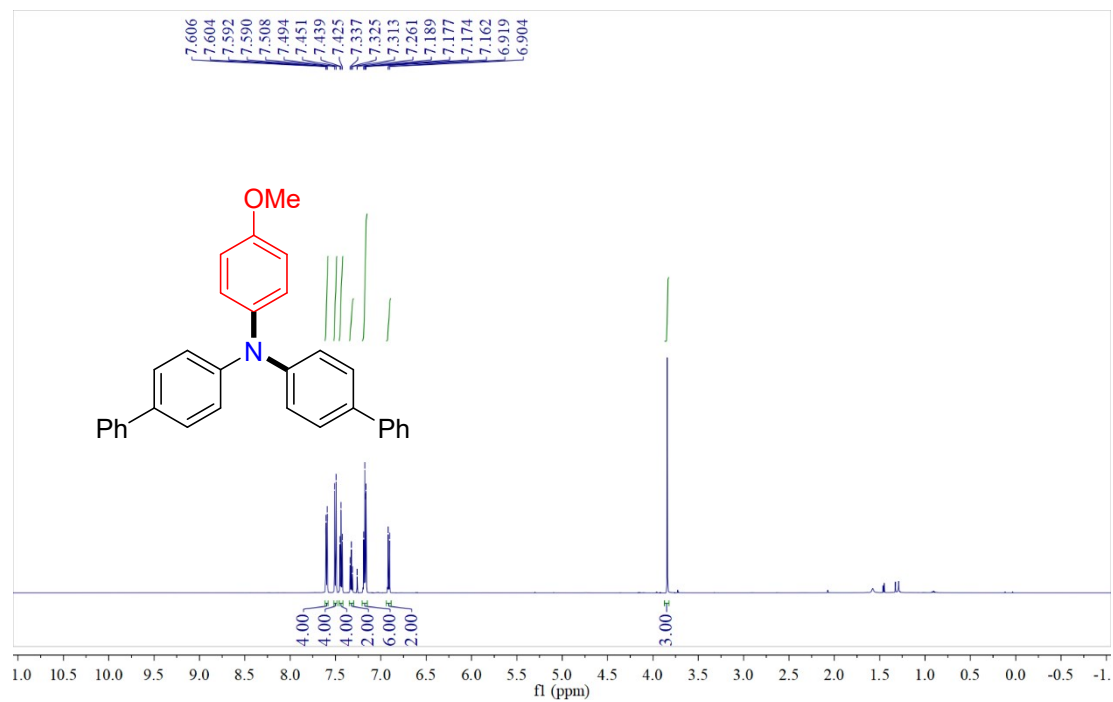

### <sup>13</sup>C NMR Spectrum of **51**

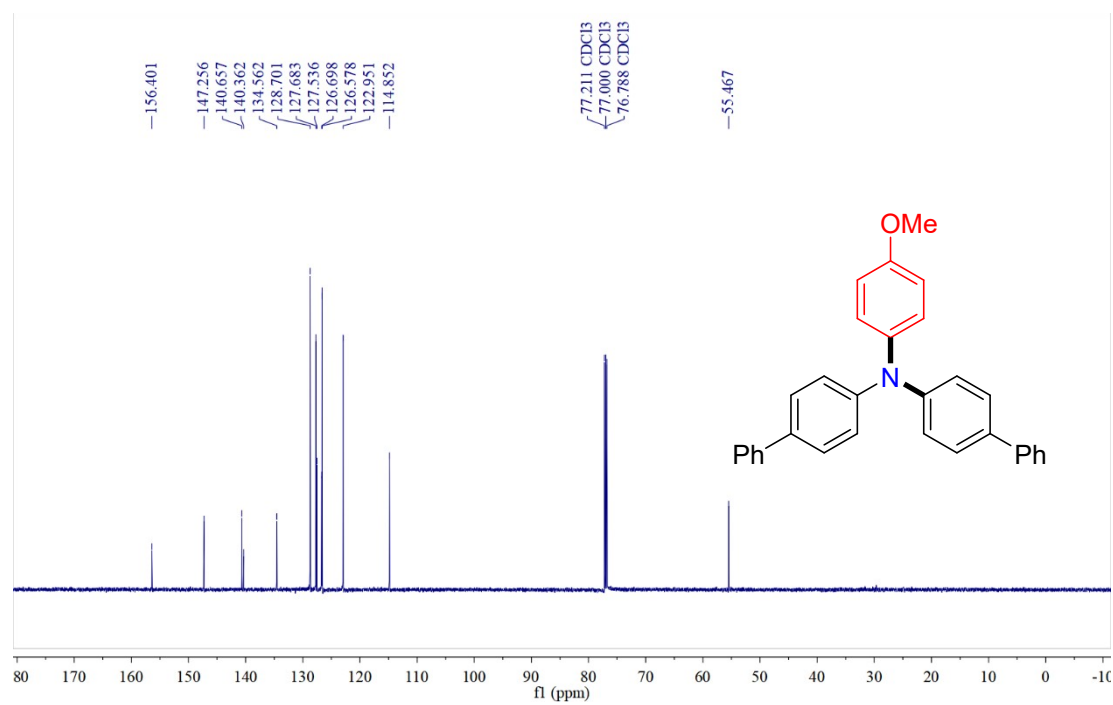

### <sup>1</sup>H NMR Spectrum of **5m**

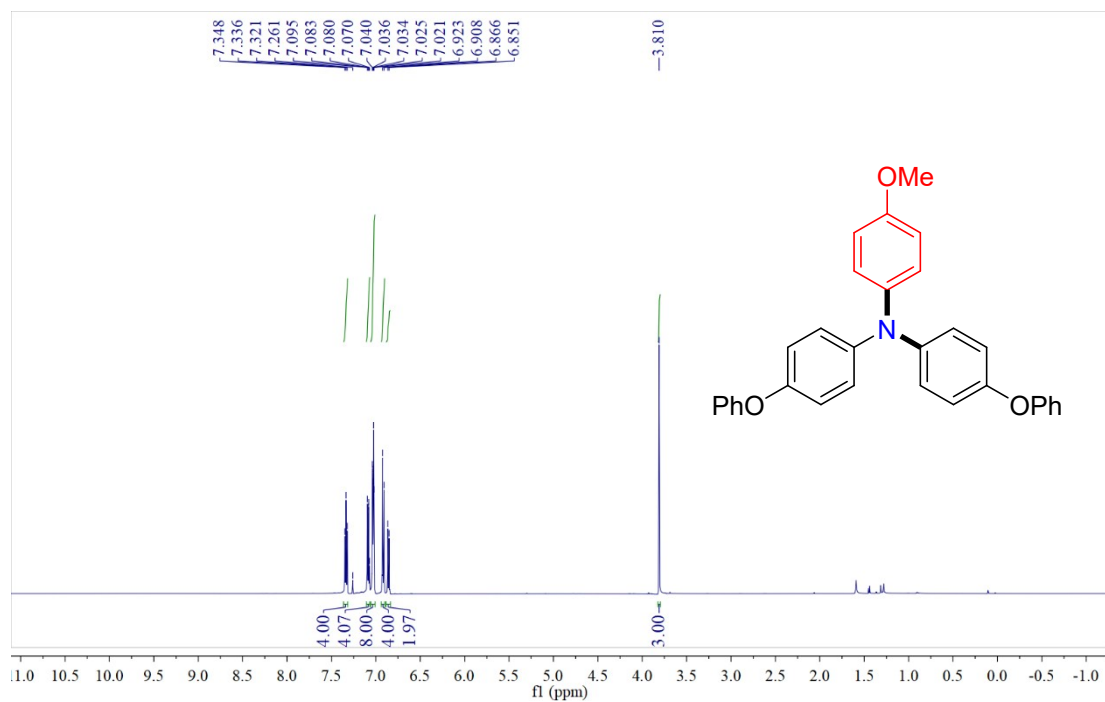

### <sup>13</sup>C NMR Spectrum of **5m**

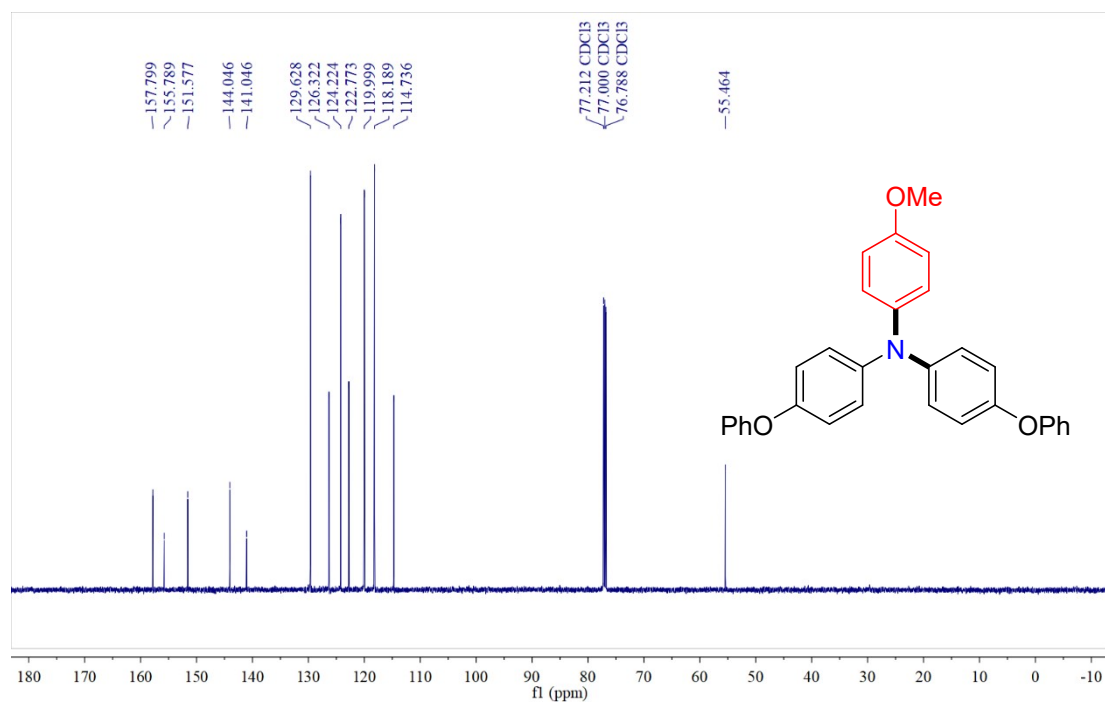

### <sup>1</sup>H NMR Spectrum of **5n**

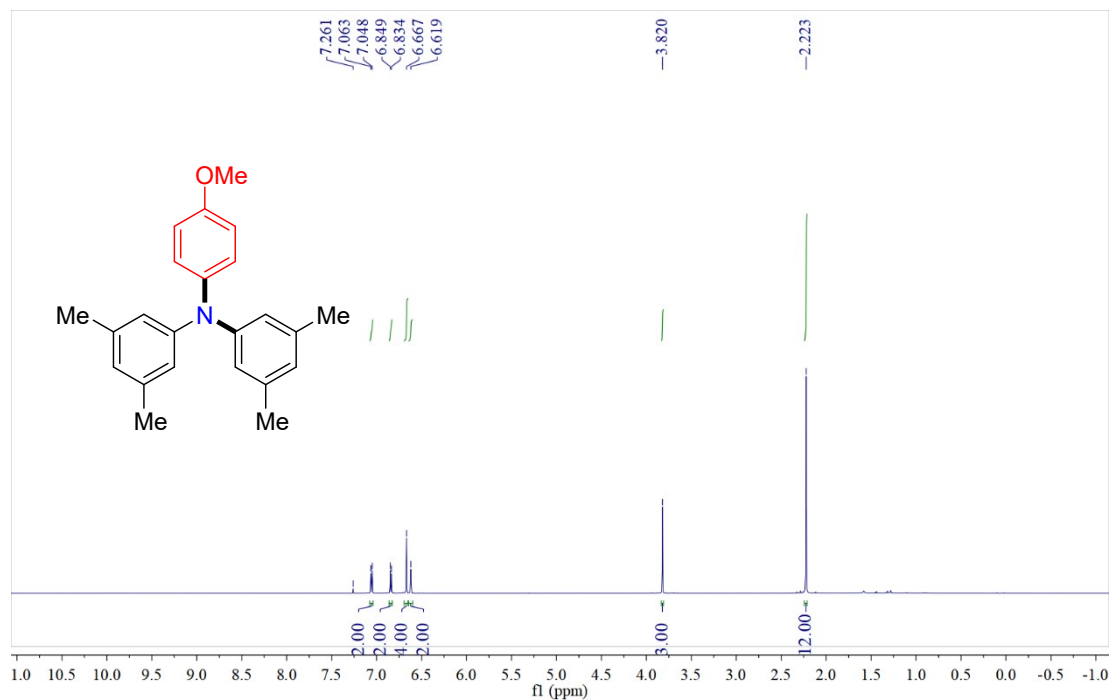

### <sup>13</sup>C NMR Spectrum of **5n**

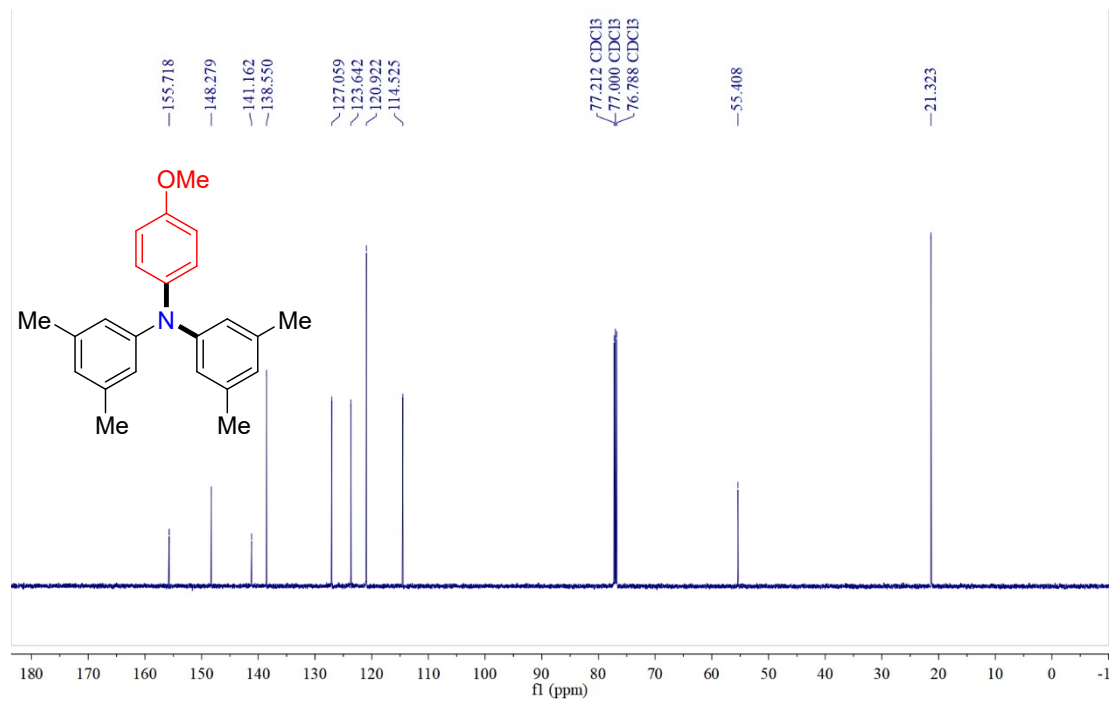

### <sup>1</sup>H NMR Spectrum of **50**

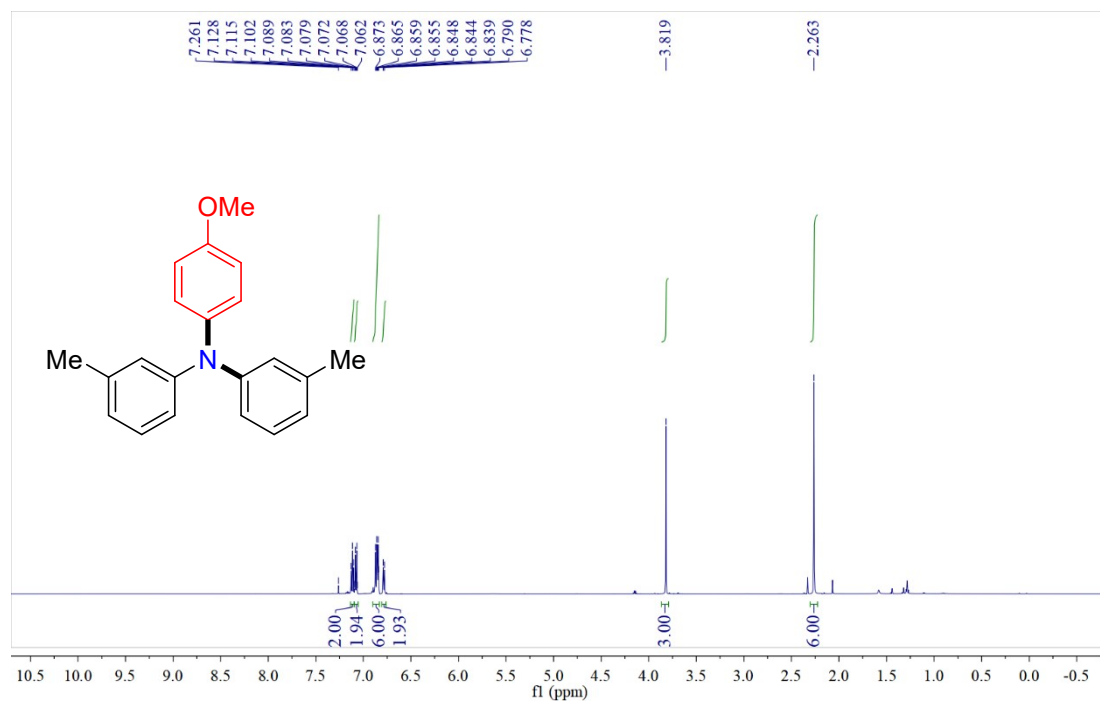

### <sup>13</sup>C NMR Spectrum of **50**

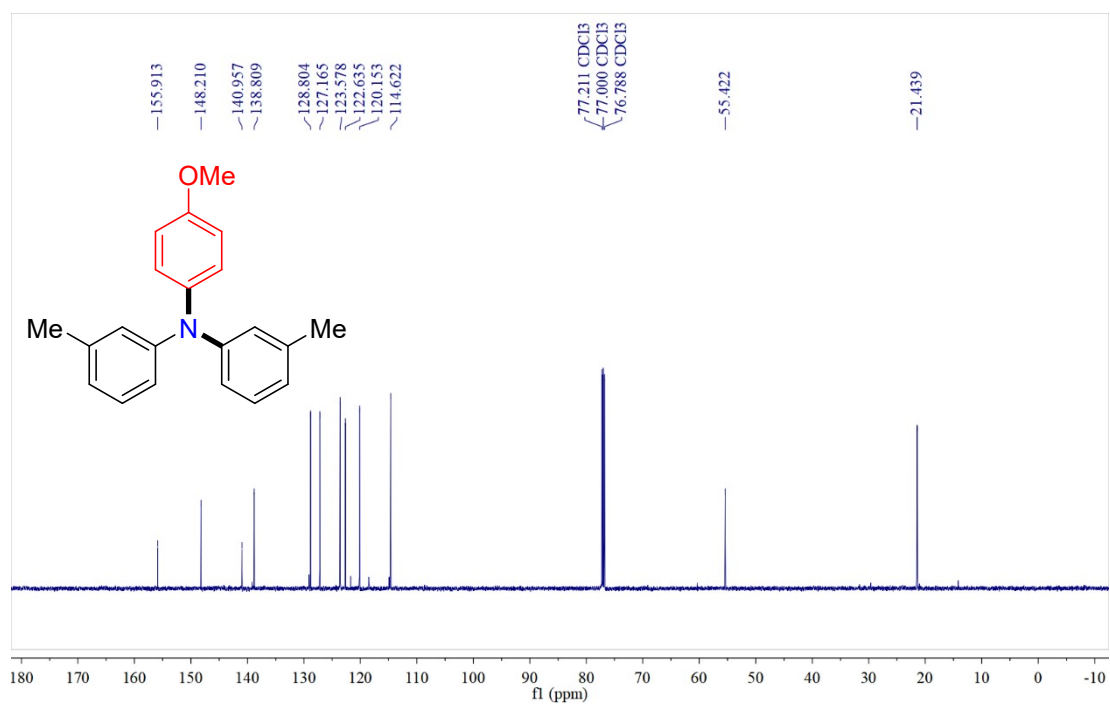

### $^1\text{H}$ NMR Spectrum of **5p**

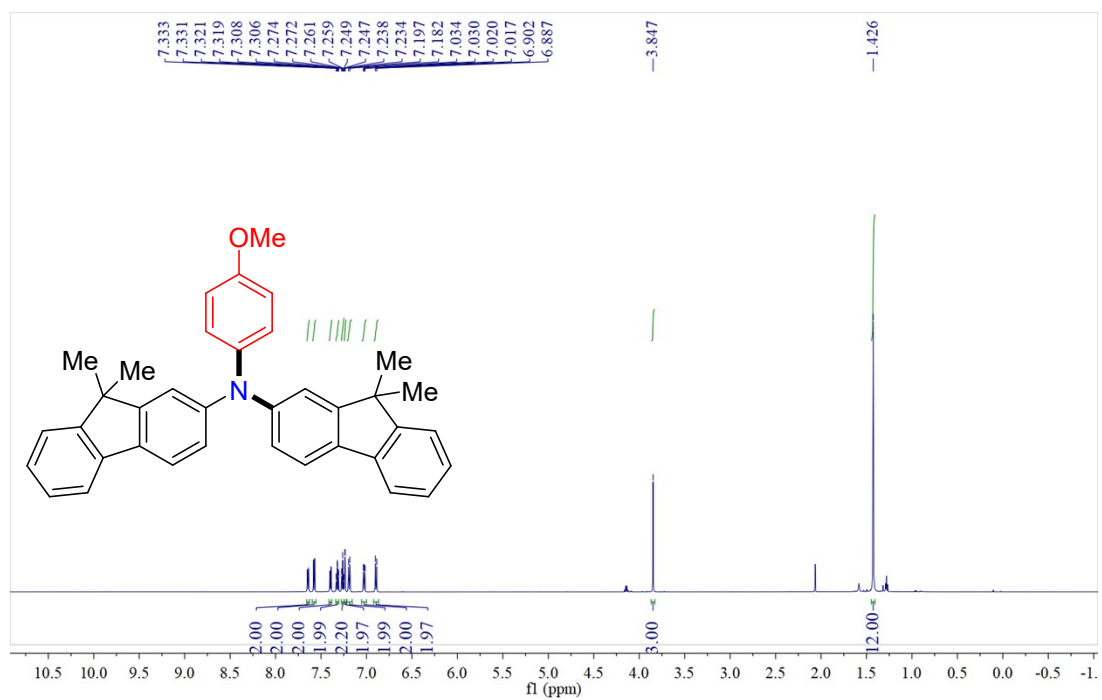

### $^{13}\text{C}$ NMR Spectrum of **5p**

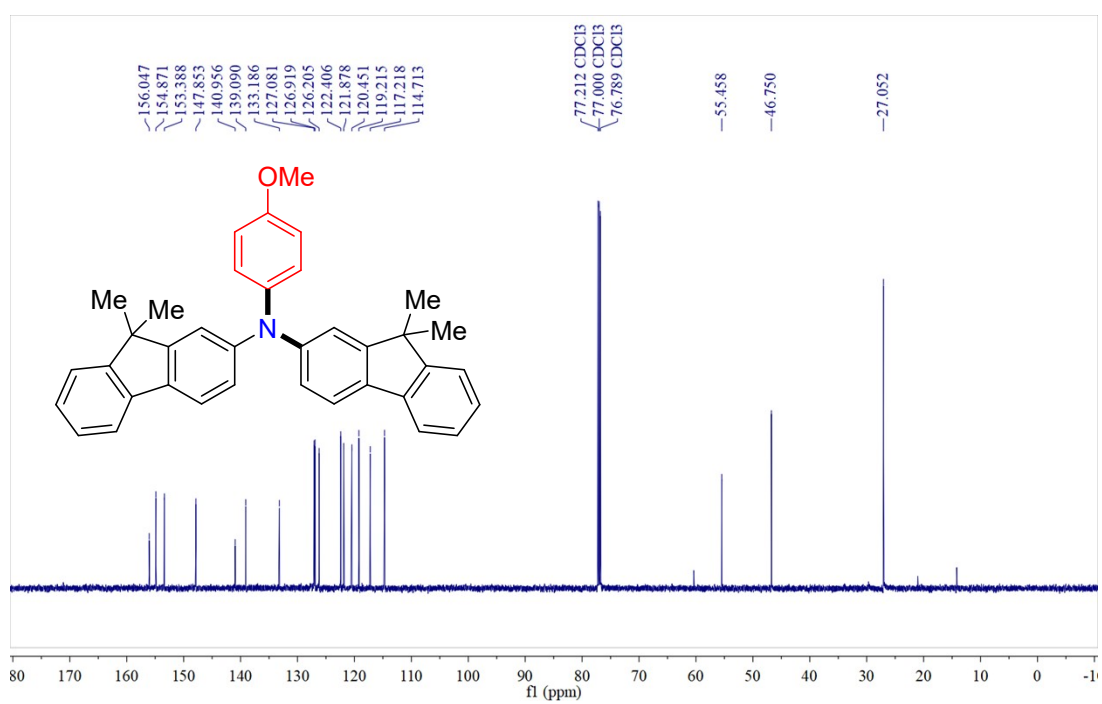

Supplement: d3sc06618e1.pdf [file d3sc06618e1.pdf]
